# Supplementary material
Source: publisher figshare collection journal article supplement (https://acs.figshare.com/ndownloader/files/9716959)
Supplement: Supplementary file 1 [file 9716959]

data_will2 

# start Validation Reply Form
_vrf_PLAT201_will2
;
PROBLEM: Isotropic non-H Atoms in Main Residue(s) ....... 20 Report
RESPONSE: The structure has a large number of disordered CF3 
groups that were constrained using SADI commands. As such all 
partial atoms were refined isotropical
;
_vrf_PLAT221_will2
;
PROBLEM: Solv./Anion Resd 2 C Ueq(max)/Ueq(min) Range 10.0 Ratio
RESPONSE: One of the four complexes exhibits a large number of 
disordered CF3 groups. One of these groups exhibited a set of 
relatively larger than expected displacement parameters.
;
# end Validation Reply Form


_audit_update_record
;
2017-03-06 # Formatted by publCIF

;

# publcif _publ_body_element loop start
loop_
_publ_body_element
_publ_body_title
_publ_body_contents

 section 
;
Introduction
; 
;

;
 section 
;
Experimental
; 
;

;
 subsection 
;
Synthesis and crystallization
; 
;

;
 subsection 
;
Refinement
;
;
Crystal data, data collection and structure refinement details are summarized
in Table 1.
;

 section 
;
Results and discussion
; 
;

;
# publcif _publ_body_element loop end
  
_audit_creation_method            'SHELXL-2014/7' 
_shelx_SHELXL_version_number      '2014/7' 
_chemical_name_systematic         ? 
_chemical_name_common             ? 
_chemical_melting_point           ? 
_chemical_formula_moiety          
'2(C6 H6 O3 F9 P Br Au).2(C18 H18 O9 F27 P3 Br3 Au3)'
_chemical_formula_sum 
 'C48 H46 Au8 Br8 F72 O24 P8' 
_chemical_formula_weight          4837.62 
  
loop_ 
 _atom_type_symbol 
 _atom_type_description 
 _atom_type_scat_dispersion_real 
 _atom_type_scat_dispersion_imag 
 _atom_type_scat_source 
 'C'  'C'   0.0033   0.0016 
 'International Tables Vol C Tables 4.2.6.8 and 6.1.1.4' 
 'H'  'H'   0.0000   0.0000 
 'International Tables Vol C Tables 4.2.6.8 and 6.1.1.4' 
 'O'  'O'   0.0106   0.0060 
 'International Tables Vol C Tables 4.2.6.8 and 6.1.1.4' 
 'F'  'F'   0.0171   0.0103 
 'International Tables Vol C Tables 4.2.6.8 and 6.1.1.4' 
 'P'  'P'   0.1023   0.0942 
 'International Tables Vol C Tables 4.2.6.8 and 6.1.1.4' 
 'Br'  'Br'  -0.2901   2.4595 
 'International Tables Vol C Tables 4.2.6.8 and 6.1.1.4' 
 'Au'  'Au'  -2.0133   8.8022 
 'International Tables Vol C Tables 4.2.6.8 and 6.1.1.4' 
  
_space_group_crystal_system       monoclinic 
_space_group_IT_number            14 
_space_group_name_H-M_alt         'P 21/n' 
_space_group_name_Hall            '-P 2yn' 
  
_shelx_space_group_comment 
; 
The symmetry employed for this shelxl refinement is uniquely defined 
by the following loop, which should always be used as a source of 
symmetry information in preference to the above space-group names. 
They are only intended as comments. 
; 
  
loop_ 
 _space_group_symop_operation_xyz 
 'x, y, z' 
 '-x+1/2, y+1/2, -z+1/2' 
 '-x, -y, -z' 
 'x-1/2, -y-1/2, z-1/2' 
  
_cell_length_a                    12.816(7) 
_cell_length_b                    24.424(14) 
_cell_length_c                    36.10(2) 
_cell_angle_alpha                 90 
_cell_angle_beta                  90.887(8) 
_cell_angle_gamma                 90 
_cell_volume                      11300(11) 
_cell_formula_units_Z             4 
_cell_measurement_temperature     100(2) 
_cell_measurement_reflns_used     9873 
_cell_measurement_theta_min       2.0 
_cell_measurement_theta_max       28.0 
  
_exptl_crystal_description        needle 
_exptl_crystal_colour             colourless 
_exptl_crystal_density_meas       ? 
_exptl_crystal_density_method     ? 
_exptl_crystal_density_diffrn     2.844 
_exptl_crystal_F_000              8824 
_exptl_transmission_factor_min    0.25194 
_exptl_transmission_factor_max    0.77212 
_exptl_crystal_size_max           0.264 
_exptl_crystal_size_mid           0.036 
_exptl_crystal_size_min           0.034 
_exptl_absorpt_coefficient_mu     13.464 
_shelx_estimated_absorpt_T_min    ? 
_shelx_estimated_absorpt_T_max    ? 
_exptl_absorpt_correction_type    analytical 
_exptl_absorpt_correction_T_min   ? 
_exptl_absorpt_correction_T_max   ? 
_exptl_absorpt_process_details    
'based on measured indexed crystal faces, Bruker SHELXTL2014 (Sheldrick, 2014)' 
  
_diffrn_ambient_temperature       100(2) 
_diffrn_radiation_wavelength      0.71073 
_diffrn_radiation_type            MoK\a 
_diffrn_source               'fine-focus sealed tube' 
_diffrn_measurement_device_type   'Bruker APEX-II DUO' 
_diffrn_measurement_method        'phi and omega scans' 
_diffrn_detector_area_resol_mean  ? 
_diffrn_reflns_number             200126 
_diffrn_reflns_av_unetI/netI      0.0614 
_diffrn_reflns_av_R_equivalents   0.0987 
_diffrn_reflns_limit_h_min        -16 
_diffrn_reflns_limit_h_max        16 
_diffrn_reflns_limit_k_min        -31 
_diffrn_reflns_limit_k_max        31 
_diffrn_reflns_limit_l_min        -46 
_diffrn_reflns_limit_l_max        46 
_diffrn_reflns_theta_min          1.668 
_diffrn_reflns_theta_max          27.500 
_diffrn_reflns_theta_full         25.242 
_diffrn_measured_fraction_theta_max   1.000 
_diffrn_measured_fraction_theta_full  1.000 
_diffrn_reflns_Laue_measured_fraction_max    1.000 
_diffrn_reflns_Laue_measured_fraction_full   1.000 
_diffrn_reflns_point_group_measured_fraction_max   1.000 
_diffrn_reflns_point_group_measured_fraction_full  1.000 
_reflns_number_total              25952 
_reflns_number_gt                 18946 
_reflns_threshold_expression      'I > 2\s(I)' 
_reflns_Friedel_coverage          0.000 
_reflns_Friedel_fraction_max      . 
_reflns_Friedel_fraction_full     . 
  
_reflns_special_details 
; 
 Reflections were merged by SHELXL according to the crystal 
 class for the calculation of statistics and refinement. 
  
 _reflns_Friedel_fraction is defined as the number of unique 
 Friedel pairs measured divided by the number that would be 
 possible theoretically, ignoring centric projections and 
 systematic absences. 
; 
  
_computing_data_collection        'Bruker APEX2 (Bruker, 2014)' 
_computing_cell_refinement        'Bruker APEX2 (Bruker, 2014)' 
_computing_data_reduction         'Bruker Apex2 SAINT (Bruker, 2014)' 
_computing_structure_solution     'SHELXL2014/7, Sheldrick G. M. 2014' 
_computing_structure_refinement   'SHELXL2014/7, Sheldrick G. M. 2014' 
_computing_molecular_graphics     'XP in SHELXTL-plus, Bruker 2014' 
_computing_publication_material   'SHELXL2014/7, Sheldrick, G. M. 2014' 
_refine_special_details 
; 
All H atoms were positioned geometrically ( C---H = 0.93/1.00 \%A) and 
allowed to ride with <i>U</i>~iso~(H)= 1.2/1.5<i>U</i>~eq~(C). 
Methyl ones were allowed to rotate around the corresponding C---C. 

The asymmetric unit consists of two Au complexes and two tri-Au complexes. 
 Complex Au1 has no disorder while complex Au2 has one set of three F atoms on
 C8 disordered and refined in two parts.  Trimer Au3-Au4-Au5 has one set of
 three F atoms on C16 which were refined similar to the previous disorder.  The
 last complex of Au6-Au7-Au8 exhibits several disordered regions.  Namely, those
 sets of F atoms on Carbon atoms C36, C38, C40, C42, C44, C46 and C48.  All of
 the C-F bond lengths were constrained to be equivalent using command SADI in
 the shlex refinement.  Additionally, The whole O-CH-CF3 of O19 and O22 are
 fully disordered and also refined in two parts.  The same treatment was used
 for the methyl C atoms of C42 and C44.  
; 
_refine_ls_structure_factor_coef  Fsqd 
_refine_ls_matrix_type            full 
_refine_ls_weighting_scheme       calc 
_refine_ls_weighting_details 
'w=1/[\s^2^(Fo^2^)+(0.0248P)^2^+132.7686P] where P=(Fo^2^+2Fc^2^)/3' 
_atom_sites_solution_primary      direct 
_atom_sites_solution_secondary    difmap 
_atom_sites_solution_hydrogens    geom 
_refine_ls_hydrogen_treatment     constr 
_refine_ls_extinction_method      none 
_refine_ls_extinction_coef        . 
_refine_ls_number_reflns          25952 
_refine_ls_number_parameters      1474 
_refine_ls_number_restraints      237 
_refine_ls_R_factor_all           0.0764 
_refine_ls_R_factor_gt            0.0463 
_refine_ls_wR_factor_ref          0.1015 
_refine_ls_wR_factor_gt           0.0902 
_refine_ls_goodness_of_fit_ref    1.048 
_refine_ls_restrained_S_all       1.047 
_refine_ls_shift/su_max           0.004 
_refine_ls_shift/su_mean          0.000 
  
loop_ 
 _atom_site_label 
 _atom_site_type_symbol 
 _atom_site_fract_x 
 _atom_site_fract_y 
 _atom_site_fract_z 
 _atom_site_U_iso_or_equiv 
 _atom_site_adp_type 
 _atom_site_occupancy 
 _atom_site_site_symmetry_order 
 _atom_site_calc_flag 
 _atom_site_refinement_flags_posn 
 _atom_site_refinement_flags_adp 
 _atom_site_refinement_flags_occupancy 
 _atom_site_disorder_assembly 
 _atom_site_disorder_group 
Au1 Au 1.11767(3) 0.12930(2) 0.11575(2) 0.02813(9) Uani 1 1 d . . . . . 
Br1 Br 1.10472(8) 0.04867(4) 0.15282(3) 0.0323(2) Uani 1 1 d . . . . . 
P1 P 1.1405(3) 0.20030(12) 0.07966(8) 0.0375(7) Uani 1 1 d . . . . . 
F1 F 1.2466(8) 0.1775(4) -0.0186(2) 0.083(3) Uani 1 1 d . . . . . 
F2 F 1.3981(7) 0.1719(3) 0.0066(2) 0.072(3) Uani 1 1 d . . . . . 
F3 F 1.3563(7) 0.2424(4) -0.0260(2) 0.083(3) Uani 1 1 d . . . . . 
F4 F 1.0098(5) 0.2915(3) 0.1523(2) 0.0528(18) Uani 1 1 d . . . . . 
F5 F 1.1364(6) 0.3189(3) 0.18732(18) 0.0546(19) Uani 1 1 d . . . . . 
F6 F 1.1109(5) 0.3562(2) 0.13425(17) 0.0447(16) Uani 1 1 d . . . . . 
F7 F 1.0230(6) 0.3112(3) 0.0150(3) 0.079(3) Uani 1 1 d . . . . . 
F8 F 0.8571(6) 0.3020(3) 0.0195(2) 0.060(2) Uani 1 1 d . . . . . 
F9 F 0.9462(7) 0.2447(4) -0.0127(2) 0.081(3) Uani 1 1 d . . . . . 
O1 O 1.2451(6) 0.1942(3) 0.0571(2) 0.0418(19) Uani 1 1 d . . . . . 
O2 O 1.1445(7) 0.2580(3) 0.0982(2) 0.048(2) Uani 1 1 d . . . . . 
O3 O 1.0587(7) 0.2124(3) 0.0472(2) 0.050(2) Uani 1 1 d . . . . . 
C1 C 1.2802(10) 0.2340(5) 0.0317(3) 0.049(3) Uani 1 1 d . . . . . 
H1A H 1.3363 0.2562 0.0433 0.059 Uiso 1 1 calc R U . . . 
H1B H 1.2219 0.2587 0.0247 0.059 Uiso 1 1 calc R U . . . 
C2 C 1.3199(11) 0.2066(5) -0.0017(4) 0.052(3) Uani 1 1 d . . . . . 
C3 C 1.1792(9) 0.2672(4) 0.1360(3) 0.039(3) Uani 1 1 d . . . . . 
H3A H 1.2518 0.2810 0.1365 0.047 Uiso 1 1 calc R U . . . 
H3B H 1.1768 0.2325 0.1502 0.047 Uiso 1 1 calc R U . . . 
C4 C 1.1076(8) 0.3085(4) 0.1526(3) 0.034(2) Uani 1 1 d . . . . . 
C5 C 0.9616(10) 0.2405(6) 0.0510(3) 0.051(3) Uani 1 1 d . . . . . 
H5A H 0.9633 0.2637 0.0735 0.061 Uiso 1 1 calc R U . . . 
H5B H 0.9038 0.2139 0.0532 0.061 Uiso 1 1 calc R U . . . 
C6 C 0.9465(9) 0.2745(5) 0.0178(3) 0.042(3) Uani 1 1 d . . . . . 
Au2 Au 1.44446(3) 0.52503(2) 0.13278(2) 0.02648(9) Uani 1 1 d . . . . . 
Br2 Br 1.42625(8) 0.60524(4) 0.17021(3) 0.0323(2) Uani 1 1 d . . . . . 
P2 P 1.4706(2) 0.45422(11) 0.09645(7) 0.0288(6) Uani 1 1 d . . . . . 
F10 F 1.2337(10) 0.3529(4) 0.0598(4) 0.073(4) Uiso 0.65 1 d D . P A 1 
F11 F 1.1093(6) 0.4104(5) 0.0621(3) 0.042(3) Uiso 0.65 1 d D . P A 1 
F12 F 1.2317(12) 0.4130(7) 0.0182(3) 0.084(5) Uiso 0.65 1 d D . P A 1 
F10' F 1.241(2) 0.3630(8) 0.0333(7) 0.080(7) Uiso 0.35 1 d D . P A 2 
F11' F 1.1152(12) 0.3845(13) 0.0594(9) 0.09(1) Uiso 0.35 1 d D . P A 2 
F12' F 1.2002(12) 0.4361(6) 0.0233(3) 0.025(3) Uiso 0.35 1 d D . P A 2 
F13 F 1.4507(6) 0.3420(3) 0.2022(2) 0.062(2) Uani 1 1 d . . . . . 
F14 F 1.3435(5) 0.3755(3) 0.1619(2) 0.0454(16) Uani 1 1 d . . . . . 
F15 F 1.4379(5) 0.3064(2) 0.1481(2) 0.0501(18) Uani 1 1 d . . . . . 
F16 F 1.7412(5) 0.4725(3) 0.0292(2) 0.0522(18) Uani 1 1 d . . . . . 
F17 F 1.6862(6) 0.4176(4) -0.0126(2) 0.079(3) Uani 1 1 d . . . . . 
F18 F 1.6108(6) 0.4953(4) -0.0042(2) 0.074(3) Uani 1 1 d . . . . . 
O4 O 1.3766(6) 0.4341(4) 0.0704(2) 0.051(2) Uani 1 1 d . . . . . 
O5 O 1.5068(7) 0.3993(3) 0.1153(2) 0.050(2) Uani 1 1 d . . . . . 
O6 O 1.5557(5) 0.4648(3) 0.0665(2) 0.0341(17) Uani 1 1 d . . . . . 
C7 C 1.2756(9) 0.4375(6) 0.0796(3) 0.055(4) Uani 1 1 d . . . . . 
H7A H 1.2532 0.4763 0.0790 0.066 Uiso 1 1 calc R U . . . 
H7B H 1.2668 0.4237 0.1051 0.066 Uiso 1 1 calc R U . . . 
C8 C 1.2097(7) 0.4052(4) 0.0536(3) 0.042(3) Uani 1 1 d D . . . . 
C9 C 1.5211(8) 0.3916(4) 0.1539(3) 0.032(2) Uani 1 1 d . . . . . 
H9A H 1.5160 0.4270 0.1671 0.039 Uiso 1 1 calc R U . . . 
H9B H 1.5908 0.3756 0.1592 0.039 Uiso 1 1 calc R U . . . 
C10 C 1.4379(8) 0.3537(4) 0.1665(3) 0.033(2) Uani 1 1 d . . . . . 
C11 C 1.5843(9) 0.4252(5) 0.0385(3) 0.039(3) Uani 1 1 d . . . . . 
H11A H 1.5211 0.4116 0.0253 0.047 Uiso 1 1 calc R U . . . 
H11B H 1.6203 0.3936 0.0502 0.047 Uiso 1 1 calc R U . . . 
C12 C 1.6544(8) 0.4525(5) 0.0121(3) 0.042(3) Uani 1 1 d . . . . . 
Au3 Au 1.15713(3) 0.59535(2) 0.14607(2) 0.02143(8) Uani 1 1 d . . . . . 
Au4 Au 0.92939(3) 0.58252(2) 0.17112(2) 0.01908(7) Uani 1 1 d . . . . . 
Au5 Au 0.71685(3) 0.57867(2) 0.21130(2) 0.01970(8) Uani 1 1 d . . . . . 
Br3 Br 1.16534(7) 0.49838(4) 0.15920(3) 0.0265(2) Uani 1 1 d . . . . . 
Br4 Br 1.00782(7) 0.61023(4) 0.22919(2) 0.02503(19) Uani 1 1 d . . . . . 
Br5 Br 0.71082(8) 0.48214(4) 0.19882(3) 0.0315(2) Uani 1 1 d . . . . . 
P3 P 1.15081(18) 0.68429(10) 0.13550(7) 0.0238(5) Uani 1 1 d . . . . . 
P4 P 0.87498(19) 0.55679(10) 0.11529(7) 0.0221(5) Uani 1 1 d . . . . . 
P5 P 0.69720(18) 0.66536(10) 0.22670(6) 0.0202(5) Uani 1 1 d . . . . . 
F19 F 1.3886(6) 0.7064(4) 0.0355(2) 0.070(2) Uani 1 1 d . . . . . 
F20 F 1.2523(7) 0.7537(5) 0.0495(2) 0.099(3) Uani 1 1 d . . . . . 
F21 F 1.3956(7) 0.7688(3) 0.0766(2) 0.074(2) Uani 1 1 d . . . . . 
F25 F 1.2197(6) 0.7643(3) 0.25863(18) 0.0529(18) Uani 1 1 d . . . . . 
F26 F 1.0637(5) 0.7574(3) 0.23754(19) 0.0559(19) Uani 1 1 d . . . . . 
F27 F 1.1673(6) 0.8142(3) 0.21326(19) 0.0533(18) Uani 1 1 d . . . . . 
F28 F 1.1032(5) 0.6164(3) 0.04219(17) 0.0410(15) Uani 1 1 d . . . . . 
F29 F 1.0489(5) 0.5632(3) -0.00092(17) 0.0460(16) Uani 1 1 d . . . . . 
F30 F 1.0919(6) 0.5305(3) 0.0528(2) 0.058(2) Uani 1 1 d . . . . . 
F31 F 0.7381(5) 0.4209(3) 0.1081(2) 0.0502(18) Uani 1 1 d . . . . . 
F32 F 0.8677(6) 0.3885(3) 0.07871(19) 0.0517(18) Uani 1 1 d . . . . . 
F33 F 0.8404(6) 0.3628(3) 0.1347(2) 0.057(2) Uani 1 1 d . . . . . 
F34 F 0.7139(5) 0.6399(3) 0.05064(17) 0.0423(15) Uani 1 1 d . . . . . 
F35 F 0.5873(5) 0.6721(3) 0.08242(19) 0.0485(17) Uani 1 1 d . . . . . 
F36 F 0.5809(5) 0.5897(3) 0.06186(18) 0.0496(18) Uani 1 1 d . . . . . 
F37 F 0.8468(6) 0.8027(3) 0.26954(18) 0.0485(17) Uani 1 1 d . . . . . 
F38 F 0.7021(5) 0.7755(2) 0.29079(18) 0.0412(15) Uani 1 1 d . . . . . 
F39 F 0.8408(5) 0.7721(2) 0.32514(16) 0.0419(16) Uani 1 1 d . . . . . 
F40 F 0.4877(5) 0.7532(3) 0.15883(19) 0.0505(18) Uani 1 1 d . . . . . 
F41 F 0.5673(5) 0.8302(2) 0.16201(17) 0.0445(16) Uani 1 1 d . . . . . 
F42 F 0.6299(6) 0.7641(3) 0.13061(16) 0.0496(18) Uani 1 1 d . . . . . 
F43 F 0.4348(5) 0.7082(3) 0.29513(18) 0.0468(17) Uani 1 1 d . . . . . 
F44 F 0.3492(4) 0.6441(3) 0.26734(18) 0.0422(15) Uani 1 1 d . . . . . 
F45 F 0.4286(4) 0.7051(2) 0.23571(16) 0.0344(14) Uani 1 1 d . . . . . 
O7 O 1.2529(6) 0.7123(3) 0.1203(2) 0.0395(18) Uani 1 1 d . . . . . 
O8 O 1.0556(5) 0.7014(3) 0.11050(19) 0.0322(16) Uani 1 1 d . . . . . 
O9 O 1.1326(5) 0.7232(3) 0.17040(19) 0.0330(16) Uani 1 1 d . . . . . 
O10 O 0.9350(5) 0.5915(3) 0.08559(17) 0.0268(15) Uani 1 1 d . . . . . 
O11 O 0.8977(6) 0.4963(3) 0.10263(18) 0.0349(17) Uani 1 1 d . . . . . 
O12 O 0.7539(5) 0.5606(3) 0.10470(19) 0.0299(15) Uani 1 1 d . . . . . 
O13 O 0.7912(5) 0.7019(3) 0.24081(17) 0.0246(14) Uani 1 1 d . . . . . 
O14 O 0.6562(5) 0.7000(3) 0.19256(17) 0.0240(14) Uani 1 1 d . . . . . 
O15 O 0.6192(5) 0.6744(2) 0.26000(17) 0.0219(13) Uani 1 1 d . . . . . 
C13 C 1.3129(9) 0.6876(5) 0.0911(3) 0.040(3) Uani 1 1 d . . . . . 
H13A H 1.2727 0.6572 0.0797 0.048 Uiso 1 1 calc R U . . . 
H13B H 1.3788 0.6725 0.1015 0.048 Uiso 1 1 calc R U . . . 
C14 C 1.3363(9) 0.7296(5) 0.0627(3) 0.044(3) Uani 1 1 d . . . . . 
C15 C 1.0205(8) 0.7571(4) 0.1058(3) 0.033(2) Uani 1 1 d . . . . . 
H15A H 1.0460 0.7722 0.0821 0.039 Uiso 1 1 calc R U . . . 
H15B H 1.0471 0.7803 0.1263 0.039 Uiso 1 1 calc R U . . . 
C16 C 0.9038(10) 0.7557(3) 0.1056(2) 0.049(3) Uani 1 1 d D . . . . 
F22 F 0.8715(10) 0.8062(4) 0.0955(4) 0.049(4) Uiso 0.6 1 d D . P B 1 
F23 F 0.8746(11) 0.7423(6) 0.1402(3) 0.057(4) Uiso 0.6 1 d D . P B 1 
F24 F 0.8516(10) 0.7203(5) 0.0837(3) 0.052(4) Uiso 0.6 1 d D . P B 1 
F22' F 0.8552(12) 0.8045(4) 0.1076(5) 0.031(4) Uiso 0.4 1 d D . P B 2 
F23' F 0.8563(16) 0.7254(8) 0.1316(5) 0.060(6) Uiso 0.4 1 d D . P B 2 
F24' F 0.8819(14) 0.7292(7) 0.0734(3) 0.038(4) Uiso 0.4 1 d D . P B 2 
C17 C 1.1996(8) 0.7207(4) 0.2021(3) 0.034(2) Uani 1 1 d . . . . . 
H17A H 1.2729 0.7274 0.1951 0.040 Uiso 1 1 calc R U . . . 
H17B H 1.1952 0.6843 0.2140 0.040 Uiso 1 1 calc R U . . . 
C18 C 1.1622(9) 0.7645(5) 0.2275(3) 0.039(3) Uani 1 1 d . . . . . 
C19 C 0.9343(8) 0.5799(4) 0.0464(2) 0.030(2) Uani 1 1 d . . . . . 
H19A H 0.9027 0.6108 0.0325 0.036 Uiso 1 1 calc R U . . . 
H19B H 0.8930 0.5465 0.0411 0.036 Uiso 1 1 calc R U . . . 
C20 C 1.0451(9) 0.5717(5) 0.0350(3) 0.037(3) Uani 1 1 d . . . . . 
C21 C 0.9054(7) 0.4504(4) 0.1273(3) 0.024(2) Uani 1 1 d . . . . . 
H21A H 0.8813 0.4609 0.1522 0.029 Uiso 1 1 calc R U . . . 
H21B H 0.9788 0.4380 0.1294 0.029 Uiso 1 1 calc R U . . . 
C22 C 0.8380(9) 0.4054(4) 0.1117(3) 0.035(2) Uani 1 1 d . . . . . 
C23 C 0.6960(8) 0.6090(5) 0.1118(3) 0.032(2) Uani 1 1 d . . . . . 
H23A H 0.7433 0.6380 0.1213 0.038 Uiso 1 1 calc R U . . . 
H23B H 0.6429 0.6016 0.1308 0.038 Uiso 1 1 calc R U . . . 
C24 C 0.6433(8) 0.6278(4) 0.0763(3) 0.033(2) Uani 1 1 d . . . . . 
C25 C 0.8279(8) 0.7080(4) 0.2781(3) 0.028(2) Uani 1 1 d . . . . . 
H25A H 0.9038 0.7005 0.2795 0.033 Uiso 1 1 calc R U . . . 
H25B H 0.7920 0.6815 0.2943 0.033 Uiso 1 1 calc R U . . . 
C26 C 0.8060(8) 0.7662(4) 0.2910(3) 0.036(3) Uani 1 1 d . . . . . 
C27 C 0.5814(8) 0.7761(4) 0.1619(3) 0.033(2) Uani 1 1 d . . . . . 
C28 C 0.6399(8) 0.7585(4) 0.1955(3) 0.030(2) Uani 1 1 d . . . . . 
H28A H 0.7077 0.7778 0.1972 0.036 Uiso 1 1 calc R U . . . 
H28B H 0.5996 0.7671 0.2180 0.036 Uiso 1 1 calc R U . . . 
C29 C 0.5319(7) 0.6391(4) 0.2666(3) 0.0229(19) Uani 1 1 d . . . . . 
H29A H 0.5404 0.6204 0.2907 0.027 Uiso 1 1 calc R U . . . 
H29B H 0.5261 0.6110 0.2469 0.027 Uiso 1 1 calc R U . . . 
C30 C 0.4366(7) 0.6747(4) 0.2665(3) 0.029(2) Uani 1 1 d . . . . . 
Au6 Au 1.10139(3) 0.58227(2) 0.31485(2) 0.02032(8) Uani 1 1 d . . . . . 
Au7 Au 0.88894(3) 0.58369(2) 0.35564(2) 0.02276(8) Uani 1 1 d . . . . . 
Au8 Au 0.65398(3) 0.57306(2) 0.37667(2) 0.02906(9) Uani 1 1 d . . . . . 
Br6 Br 1.10731(8) 0.67737(4) 0.33147(3) 0.0311(2) Uani 1 1 d . . . . . 
Br7 Br 0.80792(7) 0.55736(4) 0.29771(2) 0.02459(19) Uani 1 1 d . . . . . 
Br8 Br 0.63718(7) 0.67070(4) 0.36719(3) 0.0284(2) Uani 1 1 d . . . . . 
P6 P 1.11438(18) 0.49551(9) 0.29897(6) 0.0203(5) Uani 1 1 d . . . . . 
P7 P 0.9459(2) 0.60870(11) 0.41112(7) 0.0362(7) Uani 1 1 d D . . . . 
P8 P 0.6722(2) 0.48278(12) 0.38276(8) 0.0395(7) Uani 1 1 d D . . . . 
F49 F 1.4555(5) 0.5094(3) 0.25009(18) 0.0431(16) Uani 1 1 d . . . . . 
F50 F 1.3797(5) 0.4493(2) 0.28433(16) 0.0363(14) Uani 1 1 d . . . . . 
F51 F 1.3619(5) 0.4457(3) 0.22515(18) 0.0489(18) Uani 1 1 d . . . . . 
F52 F 1.0214(8) 0.3597(4) 0.2540(3) 0.037(3) Uiso 0.6 1 d D . P C 1 
F53 F 0.8658(7) 0.3830(4) 0.2637(2) 0.029(2) Uiso 0.6 1 d D . P C 1 
F54 F 0.9421(10) 0.3907(5) 0.20663(19) 0.040(3) Uiso 0.6 1 d D . P C 1 
F52' F 1.0495(10) 0.3778(10) 0.2459(7) 0.072(7) Uiso 0.4 1 d D . P C 2 
F53' F 0.908(2) 0.3602(9) 0.2663(6) 0.103(9) Uiso 0.4 1 d D . P C 2 
F54' F 0.9061(11) 0.3880(6) 0.2101(2) 0.018(3) Uiso 0.4 1 d D . P C 2 
F55 F 1.2061(11) 0.5668(5) 0.4764(3) 0.058(4) Uiso 0.55 1 d D . P D 1 
F56 F 1.2837(8) 0.5236(6) 0.4357(4) 0.060(4) Uiso 0.55 1 d D . P D 1 
F57 F 1.1425(9) 0.4925(4) 0.4591(3) 0.044(3) Uiso 0.55 1 d D . P D 1 
F55' F 1.2632(10) 0.5702(5) 0.4579(4) 0.051(4) Uiso 0.45 1 d D . P D 2 
F56' F 1.2343(13) 0.4885(5) 0.4417(5) 0.059(4) Uiso 0.45 1 d D . P D 2 
F57' F 1.1279(10) 0.5262(7) 0.4748(3) 0.050(4) Uiso 0.45 1 d D . P D 2 
F58 F 0.751(2) 0.6519(10) 0.4719(7) 0.097(9) Uiso 0.391(12) 1 d D . P E 1 
F59 F 0.7907(19) 0.6241(9) 0.5256(5) 0.065(6) Uiso 0.391(12) 1 d D . P E 1 
F60 F 0.729(2) 0.5680(12) 0.4859(8) 0.078(8) Uiso 0.391(12) 1 d D . P E 1 
F58' F 0.6754(10) 0.6329(5) 0.4760(3) 0.059(4) Uiso 0.609(12) 1 d D . P E 2 
F59' F 0.7384(12) 0.6083(6) 0.5276(3) 0.059(4) Uiso 0.609(12) 1 d D . P E 2 
F60' F 0.7115(11) 0.5475(6) 0.4848(4) 0.051(4) Uiso 0.609(12) 1 d D . P E 2 
F61 F 0.9835(10) 0.7811(7) 0.4323(5) 0.066(5) Uiso 0.5 1 d D . P F 1 
F62 F 0.8580(19) 0.7484(11) 0.4602(4) 0.110(8) Uiso 0.5 1 d D . P F 1 
F63 F 0.8224(10) 0.7953(5) 0.4109(4) 0.035(3) Uiso 0.5 1 d D . P F 1 
F61' F 0.9623(10) 0.7772(6) 0.4489(4) 0.052(4) Uiso 0.5 1 d D . P G 2 
F62' F 0.8201(11) 0.7370(6) 0.4498(4) 0.049(4) Uiso 0.5 1 d D . P G 2 
F63' F 0.8575(12) 0.8024(5) 0.4060(4) 0.045(4) Uiso 0.5 1 d D . P G 2 
C43 C 0.6272(8) 0.4456(5) 0.3163(3) 0.038(5) Uiso 0.8 1 d D . P H 1 
H43A H 0.6594 0.4651 0.2953 0.045 Uiso 0.8 1 calc R U P H 1 
H43B H 0.5613 0.4646 0.3223 0.045 Uiso 0.8 1 calc R U P H 1 
C44 C 0.6045(6) 0.3896(5) 0.3055(2) 0.038(3) Uiso 0.8 1 d D . P H 1 
F64 F 0.5619(11) 0.3864(5) 0.2719(3) 0.090(3) Uiso 0.8 1 d D . P H 1 
F65 F 0.6884(9) 0.3581(4) 0.3059(4) 0.090(3) Uiso 0.8 1 d D . P H 1 
F66 F 0.5446(9) 0.3641(5) 0.3294(4) 0.090(3) Uiso 0.8 1 d D . P H 1 
C43' C 0.6304(18) 0.4412(8) 0.3157(3) 0.13(7) Uiso 0.2 1 d D . P H 2 
H43C H 0.6707 0.4520 0.2937 0.161 Uiso 0.2 1 calc R U P H 2 
H43D H 0.5713 0.4670 0.3177 0.161 Uiso 0.2 1 calc R U P H 2 
C44' C 0.5884(13) 0.3868(9) 0.3093(4) 0.6(4) Uiso 0.2 1 d D . P H 2 
F64' F 0.548(2) 0.3809(8) 0.2757(5) 0.014(3) Uiso 0.2 1 d D . P H 2 
F65' F 0.5169(16) 0.3732(9) 0.3336(6) 0.014(3) Uiso 0.2 1 d D . P H 2 
F66' F 0.6578(16) 0.3478(7) 0.3157(6) 0.014(3) Uiso 0.2 1 d D . P H 2 
C46 C 0.5177(19) 0.4237(9) 0.4575(6) 0.087(14) Uiso 0.45 1 d D . P I 1 
F67 F 0.6132(18) 0.4091(12) 0.4679(7) 0.116(9) Uiso 0.45 1 d D . P I 1 
F68 F 0.471(2) 0.3786(10) 0.4458(7) 0.107(9) Uiso 0.45 1 d D . P I 1 
F69 F 0.473(3) 0.4309(17) 0.4899(9) 0.20(2) Uiso 0.45 1 d D . P I 1 
C46' C 0.5402(11) 0.4339(6) 0.4621(4) 0.076(10) Uiso 0.55 1 d D . P I 2 
F67' F 0.6396(12) 0.4394(8) 0.4716(5) 0.080(5) Uiso 0.55 1 d D . P I 2 
F68' F 0.5164(13) 0.3820(6) 0.4560(5) 0.068(4) Uiso 0.55 1 d D . P I 2 
F69' F 0.4789(13) 0.4524(8) 0.4883(4) 0.075(5) Uiso 0.55 1 d D . P I 2 
F70 F 0.9658(9) 0.4338(5) 0.3864(3) 0.048(3) Uiso 0.6 1 d D . P J 1 
F71 F 0.9586(13) 0.4504(6) 0.4456(4) 0.065(5) Uiso 0.6 1 d D . P J 1 
F72 F 0.9642(9) 0.3665(3) 0.4199(4) 0.037(3) Uiso 0.6 1 d D . P J 1 
F70' F 0.9822(11) 0.4519(6) 0.3988(5) 0.042(4) Uiso 0.4 1 d D . P J 2 
F71' F 0.9319(16) 0.4423(8) 0.4517(4) 0.041(5) Uiso 0.4 1 d D . P J 2 
F72' F 0.9613(16) 0.3699(5) 0.4319(6) 0.047(6) Uiso 0.4 1 d D . P J 2 
O16 O 1.1572(5) 0.4610(2) 0.33292(17) 0.0219(14) Uani 1 1 d . . . . . 
O17 O 1.1859(5) 0.4834(3) 0.26456(17) 0.0250(14) Uani 1 1 d . . . . . 
O18 O 1.0158(5) 0.4605(3) 0.28736(17) 0.0242(14) Uani 1 1 d . . . . . 
O19 O 1.0701(6) 0.6026(6) 0.4179(5) 0.032(5) Uiso 0.391(12) 1 d D . P D 1 
O20 O 0.890(2) 0.5744(9) 0.4430(4) 0.064(7) Uiso 0.391(12) 1 d D . P E 1 
O19' O 1.0339(7) 0.5759(4) 0.4340(2) 0.028(3) Uiso 0.609(12) 1 d D . P D 2 
O20' O 0.8515(7) 0.5977(5) 0.4393(2) 0.025(3) Uiso 0.609(12) 1 d D . P E 2 
O21 O 0.9686(5) 0.6712(3) 0.41843(18) 0.0284(15) Uani 1 1 d . . . . . 
O22 O 0.6950(6) 0.4474(3) 0.34711(18) 0.0446(19) Uani 1 1 d D . . . . 
O23 O 0.5777(5) 0.4487(3) 0.3976(2) 0.048(2) Uani 1 1 d D . . . . 
O24 O 0.7726(5) 0.4693(3) 0.40657(18) 0.0311(16) Uani 1 1 d D . . . . 
C31 C 1.1724(8) 0.4027(4) 0.3311(3) 0.025(2) Uani 1 1 d . . . . . 
H31A H 1.2079 0.3928 0.3078 0.030 Uiso 1 1 calc R U . . . 
H31B H 1.1043 0.3836 0.3315 0.030 Uiso 1 1 calc R U . . . 
C32 C 1.2373(8) 0.3862(4) 0.3635(3) 0.034(2) Uani 1 1 d D . . . . 
F46 F 1.2494(6) 0.3324(2) 0.36427(18) 0.0488(18) Uani 1 1 d D . . . . 
F47 F 1.3327(5) 0.4079(3) 0.3629(2) 0.056(2) Uani 1 1 d D . . . . 
F48 F 1.1948(6) 0.4009(3) 0.39518(17) 0.058(2) Uani 1 1 d D . . . . 
C33 C 1.2752(7) 0.5173(4) 0.2558(3) 0.025(2) Uani 1 1 d . . . . . 
H33A H 1.2868 0.5452 0.2753 0.030 Uiso 1 1 calc R U . . . 
H33B H 1.2634 0.5363 0.2319 0.030 Uiso 1 1 calc R U . . . 
C34 C 1.3681(8) 0.4799(4) 0.2535(3) 0.031(2) Uani 1 1 d . . . . . 
C35 C 0.9743(8) 0.4564(4) 0.2502(3) 0.028(2) Uani 1 1 d . . . . . 
H35A H 1.0260 0.4695 0.2322 0.034 Uiso 1 1 calc R U . . . 
H35B H 0.9102 0.4788 0.2475 0.034 Uiso 1 1 calc R U . . . 
C36 C 0.9504(6) 0.3979(5) 0.24376(17) 0.047(3) Uani 1 1 d D . . . . 
C37 C 1.1195(14) 0.5492(9) 0.4146(5) 0.031(8) Uiso 0.391(12) 1 d D . P D 1 
C37' C 1.1325(11) 0.5667(9) 0.4153(5) 0.036(5) Uiso 0.609(12) 1 d D . P D 2 
C38 C 1.1895(6) 0.5364(3) 0.4468(2) 0.030(2) Uani 1 1 d D . . . . 
C39 C 0.903(2) 0.5979(12) 0.4799(6) 0.034(6) Uiso 0.391(12) 1 d D . P E 1 
H39A H 0.9459 0.6316 0.4793 0.041 Uiso 0.391(12) 1 calc R U P E 1 
H39B H 0.9357 0.5713 0.4973 0.041 Uiso 0.391(12) 1 calc R U P E 1 
C40 C 0.793(2) 0.6101(9) 0.4902(5) 0.039(7) Uiso 0.391(12) 1 d D . P E 1 
C39' C 0.8519(14) 0.6058(7) 0.4793(3) 0.030(4) Uiso 0.609(12) 1 d D . P E 2 
H39C H 0.8770 0.6430 0.4856 0.036 Uiso 0.609(12) 1 calc R U P E 2 
H39D H 0.8984 0.5787 0.4916 0.036 Uiso 0.609(12) 1 calc R U P E 2 
C40' C 0.7425(15) 0.5983(5) 0.4916(3) 0.042(5) Uiso 0.609(12) 1 d D . P E 2 
C41 C 0.9101(8) 0.7130(4) 0.3991(3) 0.026(2) Uani 1 1 d D . . . . 
H41A H 0.8436 0.6977 0.3893 0.031 Uiso 0.5 1 calc R U P K 1 
H41B H 0.9506 0.7270 0.3779 0.031 Uiso 0.5 1 calc R U P K 1 
H41C H 0.8426 0.6982 0.3899 0.031 Uiso 0.5 1 calc R U P L 2 
H41D H 0.9498 0.7267 0.3777 0.031 Uiso 0.5 1 calc R U P L 2 
C42 C 0.8891(7) 0.7574(5) 0.4251(3) 0.11(2) Uiso 0.5 1 d D . P F 1 
C42' C 0.8929(15) 0.7572(7) 0.4258(5) 0.025(7) Uiso 0.5 1 d D . P G 2 
C45 C 0.5147(10) 0.4679(5) 0.4287(3) 0.051(3) Uani 1 1 d D . . . . 
H45A H 0.4419 0.4748 0.4204 0.062 Uiso 0.55 1 calc R U P I 1 
H45B H 0.5439 0.5023 0.4390 0.062 Uiso 0.55 1 calc R U P I 1 
H45C H 0.4395 0.4645 0.4224 0.062 Uiso 0.45 1 calc R U P I 2 
H45D H 0.5301 0.5069 0.4339 0.062 Uiso 0.45 1 calc R U P I 2 
C47 C 0.8087(8) 0.4143(5) 0.4114(4) 0.043(3) Uani 1 1 d . . . . . 
H47A H 0.7935 0.3924 0.3889 0.052 Uiso 1 1 calc R U . . . 
H47B H 0.7736 0.3969 0.4327 0.052 Uiso 1 1 calc R U . . . 
C48 C 0.9228(9) 0.4173(3) 0.4185(2) 0.041(3) Uani 1 1 d D . . . . 
  
loop_ 
 _atom_site_aniso_label 
 _atom_site_aniso_U_11 
 _atom_site_aniso_U_22 
 _atom_site_aniso_U_33 
 _atom_site_aniso_U_23 
 _atom_site_aniso_U_13 
 _atom_site_aniso_U_12 
Au1 0.0311(2) 0.0270(2) 0.02639(19) 0.00249(15) 0.00313(16) 0.00509(16) 
Br1 0.0324(5) 0.0298(5) 0.0346(5) 0.0053(4) -0.0068(4) -0.0028(4) 
P1 0.0530(18) 0.0285(14) 0.0312(15) 0.0048(12) 0.0064(13) 0.0080(13) 
F1 0.125(8) 0.073(6) 0.051(5) -0.009(4) -0.011(5) -0.011(6) 
F2 0.085(6) 0.073(6) 0.059(5) 0.028(4) 0.023(4) 0.040(5) 
F3 0.102(7) 0.070(6) 0.079(6) 0.039(5) 0.041(5) 0.024(5) 
F4 0.035(4) 0.053(4) 0.071(5) 0.000(4) 0.004(3) 0.005(3) 
F5 0.080(5) 0.048(4) 0.036(4) -0.005(3) -0.006(4) -0.002(4) 
F6 0.067(4) 0.025(3) 0.043(4) 0.009(3) 0.007(3) 0.010(3) 
F7 0.054(5) 0.064(5) 0.117(7) 0.050(5) -0.015(5) -0.015(4) 
F8 0.056(5) 0.074(5) 0.051(4) 0.002(4) -0.009(4) 0.004(4) 
F9 0.088(6) 0.119(8) 0.035(4) -0.020(5) -0.022(4) 0.030(6) 
O1 0.051(5) 0.032(4) 0.044(5) 0.003(3) 0.016(4) 0.000(4) 
O2 0.083(6) 0.029(4) 0.033(4) 0.011(3) 0.002(4) 0.010(4) 
O3 0.070(6) 0.040(5) 0.040(5) 0.007(4) 0.002(4) 0.011(4) 
C1 0.060(8) 0.038(7) 0.050(7) 0.011(6) 0.014(6) -0.009(6) 
C2 0.070(9) 0.040(7) 0.047(8) 0.012(6) 0.022(7) 0.008(7) 
C3 0.043(6) 0.033(6) 0.041(6) 0.010(5) 0.006(5) -0.007(5) 
C4 0.029(5) 0.027(5) 0.045(7) -0.001(5) -0.001(5) -0.002(4) 
C5 0.052(8) 0.064(9) 0.038(7) 0.013(6) 0.000(6) 0.000(7) 
C6 0.036(6) 0.057(8) 0.033(6) 0.006(5) -0.007(5) -0.005(6) 
Au2 0.02673(19) 0.02450(19) 0.02814(19) 0.00318(15) -0.00141(15) -0.00184(15) 
Br2 0.0284(5) 0.0316(5) 0.0368(6) -0.0036(4) -0.0043(4) 0.0004(4) 
P2 0.0294(13) 0.0267(13) 0.0304(14) 0.0019(11) -0.0001(11) -0.0042(11) 
F13 0.082(5) 0.055(5) 0.051(4) 0.032(4) 0.019(4) 0.019(4) 
F14 0.030(3) 0.036(4) 0.070(5) -0.009(3) 0.003(3) 0.000(3) 
F15 0.047(4) 0.025(3) 0.078(5) -0.002(3) 0.013(4) -0.006(3) 
F16 0.036(4) 0.063(5) 0.058(4) 0.012(4) 0.001(3) -0.003(3) 
F17 0.063(5) 0.111(7) 0.065(5) -0.028(5) 0.032(4) -0.010(5) 
F18 0.054(5) 0.104(7) 0.063(5) 0.054(5) 0.011(4) 0.012(5) 
O4 0.035(4) 0.069(6) 0.050(5) -0.023(4) 0.003(4) -0.010(4) 
O5 0.093(7) 0.022(4) 0.035(4) 0.006(3) 0.011(4) 0.005(4) 
O6 0.035(4) 0.026(4) 0.041(4) 0.007(3) 0.001(3) 0.001(3) 
C7 0.036(7) 0.094(11) 0.033(6) -0.022(7) -0.007(5) 0.011(7) 
C8 0.052(7) 0.039(7) 0.036(6) -0.001(5) 0.004(5) -0.020(6) 
C9 0.031(5) 0.027(5) 0.039(6) 0.002(4) -0.007(5) -0.004(4) 
C10 0.031(6) 0.024(5) 0.044(6) 0.003(5) 0.008(5) 0.004(4) 
C11 0.033(6) 0.042(7) 0.042(6) -0.001(5) 0.005(5) -0.002(5) 
C12 0.023(5) 0.061(8) 0.043(7) 0.011(6) 0.003(5) 0.004(5) 
Au3 0.01882(17) 0.02173(17) 0.02375(18) -0.00189(14) 0.00027(14) -0.00154(14) 
Au4 0.01804(16) 0.02184(17) 0.01735(16) 0.00066(13) 0.00040(13) -0.00078(13) 
Au5 0.02001(17) 0.01961(17) 0.01947(16) -0.00105(13) 0.00000(13) 0.00062(13) 
Br3 0.0276(5) 0.0223(5) 0.0297(5) -0.0022(4) -0.0006(4) -0.0001(4) 
Br4 0.0261(5) 0.0305(5) 0.0185(4) -0.0012(4) -0.0005(4) -0.0036(4) 
Br5 0.0270(5) 0.0228(5) 0.0447(6) -0.0088(4) -0.0005(4) -0.0005(4) 
P3 0.0183(11) 0.0248(13) 0.0283(13) -0.0019(10) 0.0014(10) -0.0028(10) 
P4 0.0244(12) 0.0222(12) 0.0196(12) 0.0008(9) -0.0007(10) -0.0023(10) 
P5 0.0182(11) 0.0224(12) 0.0201(11) 0.0000(9) -0.0016(9) 0.0006(9) 
F19 0.076(6) 0.101(7) 0.033(4) 0.005(4) 0.013(4) -0.014(5) 
F20 0.080(6) 0.158(10) 0.057(5) 0.021(6) -0.025(5) 0.048(7) 
F21 0.079(6) 0.062(5) 0.080(6) 0.008(4) 0.013(5) -0.034(5) 
F25 0.063(5) 0.062(5) 0.034(4) -0.014(3) -0.011(3) 0.002(4) 
F26 0.050(4) 0.065(5) 0.053(4) -0.014(4) 0.018(4) -0.003(4) 
F27 0.085(5) 0.026(3) 0.049(4) -0.003(3) 0.005(4) -0.006(3) 
F28 0.033(3) 0.056(4) 0.035(3) 0.003(3) 0.003(3) -0.009(3) 
F29 0.048(4) 0.064(5) 0.026(3) -0.003(3) 0.006(3) 0.003(3) 
F30 0.061(5) 0.051(4) 0.061(5) 0.014(4) 0.004(4) 0.027(4) 
F31 0.031(3) 0.057(4) 0.062(5) 0.001(4) -0.013(3) -0.006(3) 
F32 0.060(4) 0.045(4) 0.050(4) -0.025(3) -0.002(3) 0.000(3) 
F33 0.086(5) 0.027(3) 0.058(4) 0.009(3) -0.034(4) -0.012(3) 
F34 0.046(4) 0.046(4) 0.036(3) 0.010(3) 0.007(3) 0.002(3) 
F35 0.040(4) 0.053(4) 0.053(4) -0.001(3) -0.003(3) 0.015(3) 
F36 0.051(4) 0.049(4) 0.047(4) 0.012(3) -0.026(3) -0.013(3) 
F37 0.075(5) 0.028(3) 0.042(4) 0.004(3) -0.001(3) -0.013(3) 
F38 0.041(4) 0.031(3) 0.051(4) -0.012(3) -0.010(3) 0.007(3) 
F39 0.057(4) 0.038(4) 0.030(3) -0.007(3) -0.020(3) -0.008(3) 
F40 0.036(4) 0.058(4) 0.058(4) 0.022(4) -0.016(3) -0.009(3) 
F41 0.064(4) 0.027(3) 0.042(4) 0.009(3) -0.006(3) 0.013(3) 
F42 0.070(5) 0.054(4) 0.025(3) 0.013(3) 0.006(3) 0.018(4) 
F43 0.044(4) 0.050(4) 0.046(4) -0.018(3) 0.004(3) 0.015(3) 
F44 0.024(3) 0.051(4) 0.052(4) 0.002(3) 0.009(3) -0.005(3) 
F45 0.030(3) 0.037(3) 0.036(3) 0.009(3) -0.004(3) 0.004(3) 
O7 0.036(4) 0.025(4) 0.058(5) -0.005(3) 0.006(4) -0.005(3) 
O8 0.032(4) 0.026(4) 0.038(4) -0.004(3) -0.012(3) 0.001(3) 
O9 0.038(4) 0.032(4) 0.028(4) -0.006(3) -0.012(3) 0.003(3) 
O10 0.026(3) 0.035(4) 0.020(3) 0.000(3) 0.001(3) -0.004(3) 
O11 0.056(5) 0.025(4) 0.023(4) -0.001(3) 0.001(3) -0.001(3) 
O12 0.027(4) 0.031(4) 0.032(4) 0.004(3) -0.005(3) -0.004(3) 
O13 0.021(3) 0.029(4) 0.024(3) 0.001(3) -0.003(3) -0.002(3) 
O14 0.028(3) 0.023(3) 0.021(3) -0.001(3) -0.005(3) -0.001(3) 
O15 0.021(3) 0.018(3) 0.027(3) -0.003(3) -0.001(3) 0.000(3) 
C13 0.031(6) 0.041(6) 0.048(7) 0.002(5) 0.014(5) -0.002(5) 
C14 0.035(6) 0.051(7) 0.046(7) 0.001(6) -0.006(6) -0.004(6) 
C15 0.035(6) 0.021(5) 0.041(6) 0.003(4) -0.009(5) 0.000(4) 
C16 0.051(7) 0.034(6) 0.063(8) 0.000(6) -0.019(6) 0.020(6) 
C17 0.031(6) 0.034(6) 0.036(6) 0.002(5) -0.007(5) 0.004(5) 
C18 0.033(6) 0.036(6) 0.046(7) -0.006(5) -0.004(5) 0.001(5) 
C19 0.032(5) 0.039(6) 0.018(5) -0.005(4) -0.003(4) -0.006(5) 
C20 0.044(6) 0.043(7) 0.024(5) 0.015(5) -0.010(5) 0.000(5) 
C21 0.023(5) 0.020(5) 0.029(5) 0.000(4) -0.006(4) 0.001(4) 
C22 0.041(6) 0.025(5) 0.038(6) 0.002(5) -0.016(5) -0.005(5) 
C23 0.022(5) 0.049(7) 0.024(5) 0.000(5) -0.003(4) 0.005(5) 
C24 0.035(6) 0.031(6) 0.035(6) -0.004(5) 0.003(5) 0.001(5) 
C25 0.029(5) 0.029(5) 0.025(5) 0.002(4) -0.014(4) 0.000(4) 
C26 0.034(6) 0.023(5) 0.050(7) 0.002(5) -0.009(5) -0.013(4) 
C27 0.037(6) 0.035(6) 0.028(5) 0.005(4) 0.000(5) 0.007(5) 
C28 0.033(5) 0.016(5) 0.039(6) 0.000(4) -0.006(5) -0.001(4) 
C29 0.026(5) 0.022(5) 0.021(5) -0.004(4) 0.001(4) -0.002(4) 
C30 0.023(5) 0.028(5) 0.034(6) 0.002(4) 0.005(4) -0.007(4) 
Au6 0.02258(17) 0.01687(16) 0.02145(17) -0.00071(13) -0.00194(14) 0.00200(13) 
Au7 0.02587(18) 0.02086(17) 0.02140(17) 0.00084(14) -0.00431(14) 0.00209(14) 
Au8 0.02676(19) 0.0301(2) 0.0301(2) 0.00704(16) -0.00576(16) -0.00386(16) 
Br6 0.0316(5) 0.0189(5) 0.0428(6) -0.0058(4) 0.0046(4) -0.0019(4) 
Br7 0.0277(5) 0.0261(5) 0.0199(4) 0.0008(4) -0.0014(4) -0.0021(4) 
Br8 0.0245(5) 0.0280(5) 0.0326(5) -0.0031(4) 0.0004(4) 0.0027(4) 
P6 0.0212(12) 0.0193(11) 0.0205(12) -0.0024(9) -0.0021(9) 0.0024(9) 
P7 0.0564(18) 0.0250(14) 0.0267(14) 0.0001(11) -0.0187(13) 0.0083(13) 
P8 0.0338(15) 0.0341(16) 0.0503(18) 0.0123(13) -0.0126(14) -0.0045(12) 
F49 0.029(3) 0.050(4) 0.051(4) 0.003(3) 0.010(3) 0.004(3) 
F50 0.038(3) 0.034(3) 0.037(3) 0.004(3) -0.004(3) 0.008(3) 
F51 0.048(4) 0.054(4) 0.045(4) -0.022(3) -0.004(3) 0.023(3) 
O16 0.025(3) 0.013(3) 0.027(3) 0.000(3) -0.010(3) 0.003(3) 
O17 0.026(3) 0.025(3) 0.024(3) -0.005(3) 0.002(3) 0.000(3) 
O18 0.026(3) 0.024(3) 0.023(3) 0.002(3) -0.005(3) -0.004(3) 
O21 0.033(4) 0.025(4) 0.027(4) -0.001(3) -0.012(3) -0.001(3) 
O22 0.048(5) 0.040(5) 0.046(5) -0.002(4) -0.001(4) 0.002(4) 
O23 0.041(5) 0.035(4) 0.068(6) -0.001(4) -0.004(4) 0.003(4) 
O24 0.029(4) 0.031(4) 0.033(4) 0.007(3) -0.010(3) -0.005(3) 
C31 0.034(5) 0.014(4) 0.027(5) -0.007(4) -0.005(4) 0.002(4) 
C32 0.047(7) 0.028(5) 0.026(5) 0.000(4) -0.005(5) 0.002(5) 
F46 0.077(5) 0.021(3) 0.049(4) 0.015(3) -0.006(4) 0.012(3) 
F47 0.041(4) 0.047(4) 0.080(5) 0.019(4) -0.026(4) 0.001(3) 
F48 0.086(6) 0.059(5) 0.030(4) 0.009(3) -0.001(4) 0.030(4) 
C33 0.030(5) 0.019(5) 0.025(5) 0.001(4) 0.004(4) -0.001(4) 
C34 0.026(5) 0.034(6) 0.032(6) -0.007(5) 0.001(4) 0.006(4) 
C35 0.029(5) 0.023(5) 0.032(5) -0.001(4) -0.013(4) 0.000(4) 
C36 0.072(9) 0.032(6) 0.036(6) -0.007(5) -0.017(6) 0.013(6) 
C38 0.033(6) 0.031(5) 0.027(5) 0.002(4) 0.001(4) 0.010(4) 
C41 0.027(5) 0.025(5) 0.026(5) -0.002(4) -0.008(4) 0.001(4) 
C45 0.059(8) 0.041(7) 0.054(8) -0.010(6) 0.001(6) 0.020(6) 
C47 0.035(6) 0.033(6) 0.062(8) 0.008(6) -0.016(6) -0.004(5) 
C48 0.038(6) 0.036(6) 0.050(7) 0.011(5) -0.004(5) 0.000(5) 
  
_geom_special_details 
; 
 All esds (except the esd in the dihedral angle between two l.s. planes) 
 are estimated using the full covariance matrix.  The cell esds are taken 
 into account individually in the estimation of esds in distances, angles 
 and torsion angles; correlations between esds in cell parameters are only 
 used when they are defined by crystal symmetry.  An approximate (isotropic) 
 treatment of cell esds is used for estimating esds involving l.s. planes. 
; 
  
loop_ 
 _geom_bond_atom_site_label_1 
 _geom_bond_atom_site_label_2 
 _geom_bond_distance 
 _geom_bond_site_symmetry_2 
 _geom_bond_publ_flag 
Au1 P1 2.191(3) . ? 
Au1 Br1 2.3883(15) . ? 
P1 O2 1.561(8) . ? 
P1 O1 1.586(8) . ? 
P1 O3 1.588(9) . ? 
F1 C2 1.322(16) . ? 
F2 C2 1.344(14) . ? 
F3 C2 1.328(13) . ? 
F4 C4 1.319(12) . ? 
F5 C4 1.325(12) . ? 
F6 C4 1.341(12) . ? 
F7 C6 1.333(13) . ? 
F8 C6 1.329(14) . ? 
F9 C6 1.322(14) . ? 
O1 C1 1.416(13) . ? 
O2 C3 1.446(13) . ? 
O3 C5 1.430(15) . ? 
C1 C2 1.472(17) . ? 
C1 H1A 0.9900 . ? 
C1 H1B 0.9900 . ? 
C3 C4 1.497(15) . ? 
C3 H3A 0.9900 . ? 
C3 H3B 0.9900 . ? 
C5 C6 1.469(16) . ? 
C5 H5A 0.9900 . ? 
C5 H5B 0.9900 . ? 
Au2 P2 2.199(3) . ? 
Au2 Br2 2.3934(15) . ? 
P2 O6 1.569(8) . ? 
P2 O5 1.572(8) . ? 
P2 O4 1.595(8) . ? 
F10 C8 1.331(7) . ? 
F11 C8 1.332(7) . ? 
F12 C8 1.328(7) . ? 
F10' C8 1.332(7) . ? 
F11' C8 1.330(7) . ? 
F12' C8 1.334(7) . ? 
F13 C10 1.328(13) . ? 
F14 C10 1.330(12) . ? 
F15 C10 1.332(12) . ? 
F16 C12 1.356(13) . ? 
F17 C12 1.303(14) . ? 
F18 C12 1.319(13) . ? 
O4 C7 1.344(14) . ? 
O5 C9 1.415(12) . ? 
O6 C11 1.451(13) . ? 
C7 C8 1.481(16) . ? 
C7 H7A 0.9900 . ? 
C7 H7B 0.9900 . ? 
C9 C10 1.488(14) . ? 
C9 H9A 0.9900 . ? 
C9 H9B 0.9900 . ? 
C11 C12 1.479(15) . ? 
C11 H11A 0.9900 . ? 
C11 H11B 0.9900 . ? 
Au3 P3 2.207(3) . ? 
Au3 Br3 2.4175(16) . ? 
Au3 Au4 3.0850(17) . ? 
Au4 P4 2.214(3) . ? 
Au4 Br4 2.4078(14) . ? 
Au4 Au5 3.1074(15) . ? 
Au5 P5 2.205(3) . ? 
Au5 Br5 2.4014(16) . ? 
P3 O8 1.564(7) . ? 
P3 O7 1.583(8) . ? 
P3 O9 1.599(7) . ? 
P4 O11 1.575(7) . ? 
P4 O10 1.577(7) . ? 
P4 O12 1.595(7) . ? 
P5 O13 1.577(7) . ? 
P5 O14 1.578(6) . ? 
P5 O15 1.591(7) . ? 
F19 C14 1.324(14) . ? 
F20 C14 1.310(13) . ? 
F21 C14 1.318(13) . ? 
F25 C18 1.332(12) . ? 
F26 C18 1.330(13) . ? 
F27 C18 1.322(13) . ? 
F28 C20 1.344(12) . ? 
F29 C20 1.315(12) . ? 
F30 C20 1.332(12) . ? 
F31 C22 1.340(12) . ? 
F32 C22 1.322(13) . ? 
F33 C22 1.332(12) . ? 
F34 C24 1.337(12) . ? 
F35 C24 1.318(12) . ? 
F36 C24 1.328(12) . ? 
F37 C26 1.296(12) . ? 
F38 C26 1.351(12) . ? 
F39 C26 1.314(12) . ? 
F40 C27 1.328(12) . ? 
F41 C27 1.333(12) . ? 
F42 C27 1.331(12) . ? 
F43 C30 1.319(11) . ? 
F44 C30 1.347(11) . ? 
F45 C30 1.339(11) . ? 
O7 C13 1.447(13) . ? 
O8 C15 1.442(11) . ? 
O9 C17 1.421(11) . ? 
O10 C19 1.443(11) . ? 
O11 C21 1.434(11) . ? 
O12 C23 1.421(12) . ? 
O13 C25 1.426(11) . ? 
O14 C28 1.450(11) . ? 
O15 C29 1.433(10) . ? 
C13 C14 1.485(16) . ? 
C13 H13A 0.9900 . ? 
C13 H13B 0.9900 . ? 
C15 C16 1.496(15) . ? 
C15 H15A 0.9900 . ? 
C15 H15B 0.9900 . ? 
C16 F24 1.344(7) . ? 
C16 F23' 1.347(7) . ? 
C16 F22 1.349(7) . ? 
C16 F22' 1.349(7) . ? 
C16 F23 1.352(7) . ? 
C16 F24' 1.354(7) . ? 
C17 C18 1.495(15) . ? 
C17 H17A 0.9900 . ? 
C17 H17B 0.9900 . ? 
C19 C20 1.498(15) . ? 
C19 H19A 0.9900 . ? 
C19 H19B 0.9900 . ? 
C21 C22 1.502(13) . ? 
C21 H21A 0.9900 . ? 
C21 H21B 0.9900 . ? 
C23 C24 1.513(14) . ? 
C23 H23A 0.9900 . ? 
C23 H23B 0.9900 . ? 
C25 C26 1.523(14) . ? 
C25 H25A 0.9900 . ? 
C25 H25B 0.9900 . ? 
C27 C28 1.481(14) . ? 
C28 H28A 0.9900 . ? 
C28 H28B 0.9900 . ? 
C29 C30 1.500(13) . ? 
C29 H29A 0.9900 . ? 
C29 H29B 0.9900 . ? 
Au6 P6 2.202(3) . ? 
Au6 Br6 2.3998(16) . ? 
Au6 Au7 3.1157(15) . ? 
Au7 P7 2.207(3) . ? 
Au7 Br7 2.4082(14) . ? 
Au7 Au8 3.1277(17) . ? 
Au8 P8 2.228(3) . ? 
Au8 Br8 2.4182(17) . ? 
P6 O18 1.577(6) . ? 
P6 O16 1.579(6) . ? 
P6 O17 1.583(7) . ? 
P7 O21 1.576(7) . ? 
P7 O19' 1.602(7) . ? 
P7 O20 1.602(7) . ? 
P7 O19 1.614(7) . ? 
P7 O20' 1.615(7) . ? 
P8 O23 1.570(5) . ? 
P8 O24 1.571(5) . ? 
P8 O22 1.581(5) . ? 
F49 C34 1.339(12) . ? 
F50 C34 1.346(12) . ? 
F51 C34 1.322(11) . ? 
F52 C36 1.351(7) . ? 
F53 C36 1.362(7) . ? 
F54 C36 1.355(7) . ? 
F52' C36 1.362(7) . ? 
F53' C36 1.352(7) . ? 
F54' C36 1.355(7) . ? 
F55 C38 1.316(7) . ? 
F56 C38 1.314(7) . ? 
F57 C38 1.311(7) . ? 
F55' C38 1.311(7) . ? 
F56' C38 1.317(7) . ? 
F57' C38 1.316(7) . ? 
F58 C40 1.326(10) . ? 
F59 C40 1.326(10) . ? 
F60 C40 1.326(10) . ? 
F58' C40' 1.325(9) . ? 
F59' C40' 1.325(9) . ? 
F60' C40' 1.325(10) . ? 
F61 C42 1.362(8) . ? 
F62 C42 1.353(8) . ? 
F63 C42 1.356(8) . ? 
F61' C42' 1.306(19) . ? 
F62' C42' 1.38(2) . ? 
F63' C42' 1.39(2) . ? 
C43 O22 1.402(11) . ? 
C43 C44 1.450(17) . ? 
C43 H43A 0.9900 . ? 
C43 H43B 0.9900 . ? 
C44 F66 1.321(7) . ? 
C44 F65 1.322(7) . ? 
C44 F64 1.324(7) . ? 
C43' O22 1.402(11) . ? 
C43' C44' 1.450(18) . ? 
C43' H43C 0.9900 . ? 
C43' H43D 0.9900 . ? 
C44' F66' 1.322(7) . ? 
C44' F64' 1.322(7) . ? 
C44' F65' 1.322(7) . ? 
C46 F68 1.323(7) . ? 
C46 F69 1.323(7) . ? 
C46 F67 1.323(7) . ? 
C46 C45 1.50(2) . ? 
C46' F69' 1.321(7) . ? 
C46' F68' 1.321(7) . ? 
C46' F67' 1.321(7) . ? 
C46' C45 1.49(2) . ? 
F70 C48 1.350(7) . ? 
F71 C48 1.345(7) . ? 
F72 C48 1.350(7) . ? 
F70' C48 1.346(7) . ? 
F71' C48 1.352(7) . ? 
F72' C48 1.346(7) . ? 
O16 C31 1.44(1) . ? 
O17 C33 1.452(11) . ? 
O18 C35 1.440(11) . ? 
O19 C37 1.456(11) . ? 
O20 C39 1.457(11) . ? 
O19' C37' 1.458(11) . ? 
O20' C39' 1.458(11) . ? 
O21 C41 1.440(11) . ? 
O23 C45 1.472(14) . ? 
O24 C47 1.432(12) . ? 
C31 C32 1.480(13) . ? 
C31 H31A 0.9900 . ? 
C31 H31B 0.9900 . ? 
C32 F48 1.325(10) . ? 
C32 F46 1.325(9) . ? 
C32 F47 1.333(10) . ? 
C33 C34 1.505(13) . ? 
C33 H33A 0.9900 . ? 
C33 H33B 0.9900 . ? 
C35 C36 1.478(14) . ? 
C35 H35A 0.9900 . ? 
C35 H35B 0.9900 . ? 
C37 C38 1.490(19) . ? 
C37' C38 1.53(2) . ? 
C39 C40 1.490(19) . ? 
C39 H39A 0.9900 . ? 
C39 H39B 0.9900 . ? 
C39' C40' 1.489(19) . ? 
C39' H39C 0.9900 . ? 
C39' H39D 0.9900 . ? 
C41 C42 1.464(16) . ? 
C41 C42' 1.467(16) . ? 
C41 H41A 0.9900 . ? 
C41 H41B 0.9900 . ? 
C41 H41C 0.9900 . ? 
C41 H41D 0.9900 . ? 
C45 H45A 0.9900 . ? 
C45 H45B 0.9900 . ? 
C45 H45C 0.9900 . ? 
C45 H45D 0.9900 . ? 
C47 C48 1.483(15) . ? 
C47 H47A 0.9900 . ? 
C47 H47B 0.9900 . ? 
  
loop_ 
 _geom_angle_atom_site_label_1 
 _geom_angle_atom_site_label_2 
 _geom_angle_atom_site_label_3 
 _geom_angle 
 _geom_angle_site_symmetry_1 
 _geom_angle_site_symmetry_3 
 _geom_angle_publ_flag 
P1 Au1 Br1 175.41(9) . . ? 
O2 P1 O1 106.4(5) . . ? 
O2 P1 O3 99.6(4) . . ? 
O1 P1 O3 101.0(5) . . ? 
O2 P1 Au1 117.6(3) . . ? 
O1 P1 Au1 110.6(3) . . ? 
O3 P1 Au1 119.6(4) . . ? 
C1 O1 P1 123.2(8) . . ? 
C3 O2 P1 123.5(7) . . ? 
C5 O3 P1 125.6(8) . . ? 
O1 C1 C2 109.7(10) . . ? 
O1 C1 H1A 109.7 . . ? 
C2 C1 H1A 109.7 . . ? 
O1 C1 H1B 109.7 . . ? 
C2 C1 H1B 109.7 . . ? 
H1A C1 H1B 108.2 . . ? 
F1 C2 F3 107.6(12) . . ? 
F1 C2 F2 106.6(11) . . ? 
F3 C2 F2 107.0(11) . . ? 
F1 C2 C1 111.8(11) . . ? 
F3 C2 C1 111.7(11) . . ? 
F2 C2 C1 111.8(11) . . ? 
O2 C3 C4 107.6(9) . . ? 
O2 C3 H3A 110.2 . . ? 
C4 C3 H3A 110.2 . . ? 
O2 C3 H3B 110.2 . . ? 
C4 C3 H3B 110.2 . . ? 
H3A C3 H3B 108.5 . . ? 
F4 C4 F5 108.5(9) . . ? 
F4 C4 F6 107.9(9) . . ? 
F5 C4 F6 106.9(8) . . ? 
F4 C4 C3 111.9(9) . . ? 
F5 C4 C3 110.2(9) . . ? 
F6 C4 C3 111.3(9) . . ? 
O3 C5 C6 107.3(10) . . ? 
O3 C5 H5A 110.3 . . ? 
C6 C5 H5A 110.3 . . ? 
O3 C5 H5B 110.3 . . ? 
C6 C5 H5B 110.3 . . ? 
H5A C5 H5B 108.5 . . ? 
F9 C6 F8 108.9(9) . . ? 
F9 C6 F7 107.3(10) . . ? 
F8 C6 F7 107.5(10) . . ? 
F9 C6 C5 111.6(11) . . ? 
F8 C6 C5 110.6(10) . . ? 
F7 C6 C5 110.8(10) . . ? 
P2 Au2 Br2 175.89(8) . . ? 
O6 P2 O5 103.6(4) . . ? 
O6 P2 O4 99.9(4) . . ? 
O5 P2 O4 102.0(5) . . ? 
O6 P2 Au2 113.3(3) . . ? 
O5 P2 Au2 117.3(3) . . ? 
O4 P2 Au2 118.2(3) . . ? 
C7 O4 P2 123.8(7) . . ? 
C9 O5 P2 125.0(7) . . ? 
C11 O6 P2 123.9(6) . . ? 
O4 C7 C8 110.7(9) . . ? 
O4 C7 H7A 109.5 . . ? 
C8 C7 H7A 109.5 . . ? 
O4 C7 H7B 109.5 . . ? 
C8 C7 H7B 109.5 . . ? 
H7A C7 H7B 108.1 . . ? 
F12 C8 F10 104.3(11) . . ? 
F11' C8 F10' 94(2) . . ? 
F12 C8 F11 115.3(11) . . ? 
F10 C8 F11 105.9(10) . . ? 
F11' C8 F12' 105.8(17) . . ? 
F10' C8 F12' 90.7(15) . . ? 
F12 C8 C7 113.9(10) . . ? 
F11' C8 C7 128.0(16) . . ? 
F10 C8 C7 106.1(11) . . ? 
F10' C8 C7 125.8(14) . . ? 
F11 C8 C7 110.3(9) . . ? 
F12' C8 C7 105.1(11) . . ? 
O5 C9 C10 107.5(9) . . ? 
O5 C9 H9A 110.2 . . ? 
C10 C9 H9A 110.2 . . ? 
O5 C9 H9B 110.2 . . ? 
C10 C9 H9B 110.2 . . ? 
H9A C9 H9B 108.5 . . ? 
F13 C10 F14 107.7(9) . . ? 
F13 C10 F15 107.3(8) . . ? 
F14 C10 F15 107.0(9) . . ? 
F13 C10 C9 110.5(9) . . ? 
F14 C10 C9 111.5(8) . . ? 
F15 C10 C9 112.5(9) . . ? 
O6 C11 C12 108.1(9) . . ? 
O6 C11 H11A 110.1 . . ? 
C12 C11 H11A 110.1 . . ? 
O6 C11 H11B 110.1 . . ? 
C12 C11 H11B 110.1 . . ? 
H11A C11 H11B 108.4 . . ? 
F17 C12 F18 110.5(11) . . ? 
F17 C12 F16 106.5(9) . . ? 
F18 C12 F16 104.9(10) . . ? 
F17 C12 C11 110.1(11) . . ? 
F18 C12 C11 112.8(9) . . ? 
F16 C12 C11 111.7(10) . . ? 
P3 Au3 Br3 178.59(7) . . ? 
P3 Au3 Au4 96.80(6) . . ? 
Br3 Au3 Au4 83.19(3) . . ? 
P4 Au4 Br4 173.66(7) . . ? 
P4 Au4 Au3 92.75(7) . . ? 
Br4 Au4 Au3 80.94(4) . . ? 
P4 Au4 Au5 98.65(7) . . ? 
Br4 Au4 Au5 87.66(4) . . ? 
Au3 Au4 Au5 168.563(16) . . ? 
P5 Au5 Br5 170.69(7) . . ? 
P5 Au5 Au4 101.13(6) . . ? 
Br5 Au5 Au4 88.17(3) . . ? 
O8 P3 O7 109.1(4) . . ? 
O8 P3 O9 100.0(4) . . ? 
O7 P3 O9 98.4(4) . . ? 
O8 P3 Au3 112.9(3) . . ? 
O7 P3 Au3 117.2(3) . . ? 
O9 P3 Au3 117.1(3) . . ? 
O11 P4 O10 102.3(4) . . ? 
O11 P4 O12 99.7(4) . . ? 
O10 P4 O12 106.8(4) . . ? 
O11 P4 Au4 118.3(3) . . ? 
O10 P4 Au4 108.4(3) . . ? 
O12 P4 Au4 119.6(3) . . ? 
O13 P5 O14 101.1(3) . . ? 
O13 P5 O15 99.4(3) . . ? 
O14 P5 O15 108.1(3) . . ? 
O13 P5 Au5 122.3(3) . . ? 
O14 P5 Au5 110.8(3) . . ? 
O15 P5 Au5 113.5(2) . . ? 
C13 O7 P3 121.5(6) . . ? 
C15 O8 P3 124.0(6) . . ? 
C17 O9 P3 120.9(6) . . ? 
C19 O10 P4 124.4(6) . . ? 
C21 O11 P4 124.3(6) . . ? 
C23 O12 P4 121.0(6) . . ? 
C25 O13 P5 127.0(6) . . ? 
C28 O14 P5 121.1(6) . . ? 
C29 O15 P5 122.9(5) . . ? 
O7 C13 C14 109.4(9) . . ? 
O7 C13 H13A 109.8 . . ? 
C14 C13 H13A 109.8 . . ? 
O7 C13 H13B 109.8 . . ? 
C14 C13 H13B 109.8 . . ? 
H13A C13 H13B 108.2 . . ? 
F20 C14 F21 106.1(11) . . ? 
F20 C14 F19 110.2(10) . . ? 
F21 C14 F19 107.3(10) . . ? 
F20 C14 C13 112.8(10) . . ? 
F21 C14 C13 111.2(10) . . ? 
F19 C14 C13 109.1(10) . . ? 
O8 C15 C16 106.7(7) . . ? 
O8 C15 H15A 110.4 . . ? 
C16 C15 H15A 110.4 . . ? 
O8 C15 H15B 110.4 . . ? 
C16 C15 H15B 110.4 . . ? 
H15A C15 H15B 108.6 . . ? 
F24 C16 F22 106.4(10) . . ? 
F23' C16 F22' 103.4(15) . . ? 
F24 C16 F23 104.3(12) . . ? 
F22 C16 F23 112.5(11) . . ? 
F23' C16 F24' 104.2(15) . . ? 
F22' C16 F24' 112.3(12) . . ? 
F24 C16 C15 120.4(10) . . ? 
F23' C16 C15 118.2(12) . . ? 
F22 C16 C15 106.4(9) . . ? 
F22' C16 C15 116.2(10) . . ? 
F23 C16 C15 107.1(9) . . ? 
F24' C16 C15 102.1(11) . . ? 
O9 C17 C18 105.5(8) . . ? 
O9 C17 H17A 110.6 . . ? 
C18 C17 H17A 110.6 . . ? 
O9 C17 H17B 110.6 . . ? 
C18 C17 H17B 110.6 . . ? 
H17A C17 H17B 108.8 . . ? 
F27 C18 F26 106.2(9) . . ? 
F27 C18 F25 107.5(9) . . ? 
F26 C18 F25 106.6(10) . . ? 
F27 C18 C17 113.5(10) . . ? 
F26 C18 C17 112.8(9) . . ? 
F25 C18 C17 109.8(9) . . ? 
O10 C19 C20 107.7(8) . . ? 
O10 C19 H19A 110.2 . . ? 
C20 C19 H19A 110.2 . . ? 
O10 C19 H19B 110.2 . . ? 
C20 C19 H19B 110.2 . . ? 
H19A C19 H19B 108.5 . . ? 
F29 C20 F30 109.5(10) . . ? 
F29 C20 F28 106.9(8) . . ? 
F30 C20 F28 106.0(8) . . ? 
F29 C20 C19 110.0(8) . . ? 
F30 C20 C19 112.9(9) . . ? 
F28 C20 C19 111.3(9) . . ? 
O11 C21 C22 107.8(8) . . ? 
O11 C21 H21A 110.1 . . ? 
C22 C21 H21A 110.1 . . ? 
O11 C21 H21B 110.1 . . ? 
C22 C21 H21B 110.1 . . ? 
H21A C21 H21B 108.5 . . ? 
F32 C22 F33 108.3(9) . . ? 
F32 C22 F31 106.7(8) . . ? 
F33 C22 F31 107.1(9) . . ? 
F32 C22 C21 113.3(9) . . ? 
F33 C22 C21 109.3(8) . . ? 
F31 C22 C21 111.9(9) . . ? 
O12 C23 C24 109.1(8) . . ? 
O12 C23 H23A 109.9 . . ? 
C24 C23 H23A 109.9 . . ? 
O12 C23 H23B 109.9 . . ? 
C24 C23 H23B 109.9 . . ? 
H23A C23 H23B 108.3 . . ? 
F35 C24 F36 108.3(9) . . ? 
F35 C24 F34 108.2(9) . . ? 
F36 C24 F34 107.1(8) . . ? 
F35 C24 C23 110.1(9) . . ? 
F36 C24 C23 112.2(9) . . ? 
F34 C24 C23 110.8(9) . . ? 
O13 C25 C26 109.0(8) . . ? 
O13 C25 H25A 109.9 . . ? 
C26 C25 H25A 109.9 . . ? 
O13 C25 H25B 109.9 . . ? 
C26 C25 H25B 109.9 . . ? 
H25A C25 H25B 108.3 . . ? 
F37 C26 F39 110.5(8) . . ? 
F37 C26 F38 106.7(9) . . ? 
F39 C26 F38 107.8(9) . . ? 
F37 C26 C25 112.5(10) . . ? 
F39 C26 C25 109.2(8) . . ? 
F38 C26 C25 110.0(8) . . ? 
F40 C27 F42 105.7(9) . . ? 
F40 C27 F41 107.2(9) . . ? 
F42 C27 F41 106.6(8) . . ? 
F40 C27 C28 113.1(9) . . ? 
F42 C27 C28 113.2(9) . . ? 
F41 C27 C28 110.6(9) . . ? 
O14 C28 C27 107.3(8) . . ? 
O14 C28 H28A 110.3 . . ? 
C27 C28 H28A 110.3 . . ? 
O14 C28 H28B 110.3 . . ? 
C27 C28 H28B 110.3 . . ? 
H28A C28 H28B 108.5 . . ? 
O15 C29 C30 106.8(7) . . ? 
O15 C29 H29A 110.4 . . ? 
C30 C29 H29A 110.4 . . ? 
O15 C29 H29B 110.4 . . ? 
C30 C29 H29B 110.4 . . ? 
H29A C29 H29B 108.6 . . ? 
F43 C30 F45 107.7(8) . . ? 
F43 C30 F44 107.6(8) . . ? 
F45 C30 F44 105.9(8) . . ? 
F43 C30 C29 112.4(8) . . ? 
F45 C30 C29 112.0(8) . . ? 
F44 C30 C29 110.9(8) . . ? 
P6 Au6 Br6 173.81(7) . . ? 
P6 Au6 Au7 101.76(6) . . ? 
Br6 Au6 Au7 84.01(3) . . ? 
P7 Au7 Br7 173.76(9) . . ? 
P7 Au7 Au6 98.80(9) . . ? 
Br7 Au7 Au6 87.41(4) . . ? 
P7 Au7 Au8 96.24(9) . . ? 
Br7 Au7 Au8 77.57(4) . . ? 
Au6 Au7 Au8 164.906(18) . . ? 
P8 Au8 Br8 177.37(9) . . ? 
P8 Au8 Au7 90.37(8) . . ? 
Br8 Au8 Au7 88.15(3) . . ? 
O18 P6 O16 100.6(3) . . ? 
O18 P6 O17 99.3(3) . . ? 
O16 P6 O17 108.1(4) . . ? 
O18 P6 Au6 121.8(3) . . ? 
O16 P6 Au6 109.8(2) . . ? 
O17 P6 Au6 115.5(3) . . ? 
O21 P7 O19' 105.8(5) . . ? 
O21 P7 O20 118.0(9) . . ? 
O21 P7 O19 83.4(6) . . ? 
O20 P7 O19 107.1(12) . . ? 
O21 P7 O20' 101.2(5) . . ? 
O19' P7 O20' 97.0(5) . . ? 
O21 P7 Au7 118.5(3) . . ? 
O19' P7 Au7 123.3(4) . . ? 
O20 P7 Au7 111.2(8) . . ? 
O19 P7 Au7 115.0(6) . . ? 
O20' P7 Au7 106.6(4) . . ? 
O23 P8 O24 109.4(4) . . ? 
O23 P8 O22 98.1(5) . . ? 
O24 P8 O22 99.8(4) . . ? 
O23 P8 Au8 118.6(3) . . ? 
O24 P8 Au8 110.1(3) . . ? 
O22 P8 Au8 118.8(3) . . ? 
O22 C43 C44 111.2(8) . . ? 
O22 C43 H43A 109.4 . . ? 
C44 C43 H43A 109.4 . . ? 
O22 C43 H43B 109.4 . . ? 
C44 C43 H43B 109.4 . . ? 
H43A C43 H43B 108.0 . . ? 
F66 C44 F65 101.4(10) . . ? 
F66 C44 F64 109.5(11) . . ? 
F65 C44 F64 107.5(11) . . ? 
F66 C44 C43 112.7(7) . . ? 
F65 C44 C43 112.7(7) . . ? 
F64 C44 C43 112.4(6) . . ? 
O22 C43' C44' 116.2(13) . . ? 
O22 C43' H43C 108.2 . . ? 
C44' C43' H43C 108.2 . . ? 
O22 C43' H43D 108.2 . . ? 
C44' C43' H43D 108.2 . . ? 
H43C C43' H43D 107.4 . . ? 
F66' C44' F64' 109.6(15) . . ? 
F66' C44' F65' 100.1(15) . . ? 
F64' C44' F65' 108.4(16) . . ? 
F66' C44' C43' 112.7(7) . . ? 
F64' C44' C43' 112.7(7) . . ? 
F65' C44' C43' 112.6(7) . . ? 
F68 C46 F69 100.9(18) . . ? 
F68 C46 F67 106.4(19) . . ? 
F69 C46 F67 101.4(19) . . ? 
F68 C46 C45 112(2) . . ? 
F69 C46 C45 121(3) . . ? 
F67 C46 C45 114(2) . . ? 
F69' C46' F68' 107.9(14) . . ? 
F69' C46' F67' 111.1(14) . . ? 
F68' C46' F67' 111.1(15) . . ? 
F69' C46' C45 105.2(14) . . ? 
F68' C46' C45 110.7(13) . . ? 
F67' C46' C45 110.6(14) . . ? 
C31 O16 P6 122.6(5) . . ? 
C33 O17 P6 122.2(6) . . ? 
C35 O18 P6 124.7(6) . . ? 
C37 O19 P7 120.0(9) . . ? 
C39 O20 P7 113.9(15) . . ? 
C37' O19' P7 116.5(10) . . ? 
C39' O20' P7 127.6(9) . . ? 
C41 O21 P7 120.8(6) . . ? 
C43' O22 P8 127.1(9) . . ? 
C43 O22 P8 122.9(8) . . ? 
C45 O23 P8 121.8(8) . . ? 
C47 O24 P8 121.6(6) . . ? 
O16 C31 C32 107.9(7) . . ? 
O16 C31 H31A 110.1 . . ? 
C32 C31 H31A 110.1 . . ? 
O16 C31 H31B 110.1 . . ? 
C32 C31 H31B 110.1 . . ? 
H31A C31 H31B 108.4 . . ? 
F48 C32 F46 107.5(8) . . ? 
F48 C32 F47 107.2(8) . . ? 
F46 C32 F47 106.7(8) . . ? 
F48 C32 C31 112.1(8) . . ? 
F46 C32 C31 110.6(8) . . ? 
F47 C32 C31 112.6(8) . . ? 
O17 C33 C34 107.0(7) . . ? 
O17 C33 H33A 110.3 . . ? 
C34 C33 H33A 110.3 . . ? 
O17 C33 H33B 110.3 . . ? 
C34 C33 H33B 110.3 . . ? 
H33A C33 H33B 108.6 . . ? 
F51 C34 F49 108.0(8) . . ? 
F51 C34 F50 107.1(8) . . ? 
F49 C34 F50 107.1(8) . . ? 
F51 C34 C33 112.8(8) . . ? 
F49 C34 C33 110.0(8) . . ? 
F50 C34 C33 111.7(8) . . ? 
O18 C35 C36 106.6(7) . . ? 
O18 C35 H35A 110.4 . . ? 
C36 C35 H35A 110.4 . . ? 
O18 C35 H35B 110.4 . . ? 
C36 C35 H35B 110.4 . . ? 
H35A C35 H35B 108.6 . . ? 
F52 C36 F54 102.8(9) . . ? 
F53' C36 F54' 104.5(16) . . ? 
F53' C36 F52' 96.0(17) . . ? 
F54' C36 F52' 111.2(13) . . ? 
F52 C36 F53 102.1(9) . . ? 
F54 C36 F53 116.0(9) . . ? 
F52 C36 C35 119.2(9) . . ? 
F53' C36 C35 130.5(14) . . ? 
F54 C36 C35 107.2(9) . . ? 
F54' C36 C35 113.4(9) . . ? 
F52' C36 C35 98.6(13) . . ? 
F53 C36 C35 109.8(8) . . ? 
O19 C37 C38 112.5(15) . . ? 
O19' C37' C38 97.9(10) . . ? 
F57 C38 F56 109.7(10) . . ? 
F55' C38 F57' 108.9(11) . . ? 
F57 C38 F55 104.9(10) . . ? 
F56 C38 F55 104.1(10) . . ? 
F55' C38 F56' 106.7(12) . . ? 
F57' C38 F56' 101.9(11) . . ? 
F57 C38 C37 99.2(12) . . ? 
F56 C38 C37 110.9(9) . . ? 
F55 C38 C37 127.1(11) . . ? 
F55' C38 C37' 104.8(12) . . ? 
F57' C38 C37' 112.1(10) . . ? 
F56' C38 C37' 121.9(12) . . ? 
O20 C39 C40 102.1(19) . . ? 
O20 C39 H39A 111.3 . . ? 
C40 C39 H39A 111.3 . . ? 
O20 C39 H39B 111.3 . . ? 
C40 C39 H39B 111.3 . . ? 
H39A C39 H39B 109.2 . . ? 
F58 C40 F59 105(2) . . ? 
F58 C40 F60 107(2) . . ? 
F59 C40 F60 107(2) . . ? 
F58 C40 C39 114(2) . . ? 
F59 C40 C39 109.4(19) . . ? 
F60 C40 C39 114(2) . . ? 
O20' C39' C40' 106.8(11) . . ? 
O20' C39' H39C 110.4 . . ? 
C40' C39' H39C 110.4 . . ? 
O20' C39' H39D 110.4 . . ? 
C40' C39' H39D 110.4 . . ? 
H39C C39' H39D 108.6 . . ? 
F59' C40' F58' 105.4(13) . . ? 
F59' C40' F60' 109.7(13) . . ? 
F58' C40' F60' 109.2(14) . . ? 
F59' C40' C39' 108.8(13) . . ? 
F58' C40' C39' 113.8(15) . . ? 
F60' C40' C39' 109.9(13) . . ? 
O21 C41 C42 108.2(7) . . ? 
O21 C41 C42' 106.5(10) . . ? 
O21 C41 H41A 110.1 . . ? 
C42 C41 H41A 110.1 . . ? 
O21 C41 H41B 110.1 . . ? 
C42 C41 H41B 110.1 . . ? 
H41A C41 H41B 108.4 . . ? 
O21 C41 H41C 110.4 . . ? 
C42' C41 H41C 110.4 . . ? 
O21 C41 H41D 110.4 . . ? 
C42' C41 H41D 110.4 . . ? 
H41C C41 H41D 108.6 . . ? 
F62 C42 F63 105.8(15) . . ? 
F62 C42 F61 99.5(15) . . ? 
F63 C42 F61 109.6(12) . . ? 
F62 C42 C41 122.7(14) . . ? 
F63 C42 C41 112.6(10) . . ? 
F61 C42 C41 105.4(12) . . ? 
F61' C42' F62' 101.1(15) . . ? 
F61' C42' F63' 104.2(15) . . ? 
F62' C42' F63' 113.0(16) . . ? 
F61' C42' C41 126.1(16) . . ? 
F62' C42' C41 105.1(14) . . ? 
F63' C42' C41 107.4(14) . . ? 
O23 C45 C46' 108.8(10) . . ? 
O23 C45 C46 106.9(13) . . ? 
O23 C45 H45A 110.3 . . ? 
C46 C45 H45A 110.3 . . ? 
O23 C45 H45B 110.3 . . ? 
C46 C45 H45B 110.3 . . ? 
H45A C45 H45B 108.6 . . ? 
O23 C45 H45C 109.9 . . ? 
C46' C45 H45C 109.9 . . ? 
O23 C45 H45D 109.9 . . ? 
C46' C45 H45D 109.9 . . ? 
H45C C45 H45D 108.3 . . ? 
O24 C47 C48 106.8(8) . . ? 
O24 C47 H47A 110.4 . . ? 
C48 C47 H47A 110.4 . . ? 
O24 C47 H47B 110.4 . . ? 
C48 C47 H47B 110.4 . . ? 
H47A C47 H47B 108.6 . . ? 
F70' C48 F72' 121.5(14) . . ? 
F71 C48 F72 113.2(12) . . ? 
F71 C48 F70 107.8(11) . . ? 
F72 C48 F70 98.2(9) . . ? 
F70' C48 F71' 98.2(14) . . ? 
F72' C48 F71' 92.5(13) . . ? 
F71 C48 C47 118.6(11) . . ? 
F70' C48 C47 120.4(10) . . ? 
F72' C48 C47 111.9(12) . . ? 
F72 C48 C47 110.3(9) . . ? 
F70 C48 C47 106.5(9) . . ? 
F71' C48 C47 104.2(12) . . ? 
  
_refine_diff_density_max    4.764 
_refine_diff_density_min   -2.187 
_refine_diff_density_rms    0.238 
  
_shelx_res_file 
; 
  
    will2.res created by SHELXL-2014/7 
  
  
TITL abc in P2(1)/n 
REM Old TITL will2 #5544 
  
REM SHELXT solution in P2(1)/n 
REM R1 0.126,  Rweak 0.006,  Alpha 0.053,  Orientation as input 
REM Formula found by SHELXT:  C71 O23 F51 P8 Br8 Au8 
  
CELL  0.71073  12.8163  24.4241  36.1024   90.000   90.887   90.000 
ZERR    4.000   0.0073   0.0136   0.0202    0.000    0.008    0.000 
LATT  1 
SYMM 1/2-X, 1/2+Y, 1/2-Z 
SFAC C H O F P BR AU 
UNIT 192 184 96 288 32 32 32 
TEMP -173.16 
omit -3 55 
omit 0 1 1 
omit 0 0 2 
  
L.S. 24 
acta 
BOND $H 
LIST 4 
FMAP 2 
PLAN 20 
  
sadi 0.005 p7 o19 p7 o19' p7 o20 p7 o20' 
sadi 0.005 c37 o19 c37 o19' o20 c39 o20' c39' 
sadi 0.005 c37 c38 c39 c40 c39' c40' 
sadi 0.005 c8 f10 c8 f11 c8 f12 c8 f10' c8 f11' c8 f12' 
sadi 0.005 c16 f22 c16 f23 c16 f24 c16 f22' c16 f23' c16 f24' 
sadi 0.005 c36 f52 c36 f53 c36 f54 c36 f52' c36 f53' c36 f54' 
sadi 0.005 c38 f55 c38 f56 c38 f57 c38 f55' c38 f56' c38 f57' 
sadi 0.005 c40 f58 c40 f59 c40 f60 c40' f58' c40' f59' c40' f60' 
sadi 0.005 c42 f61 c42 f62 c42 f63 c42 f61' c42 f62' c42 f63' 
sadi 0.005 c44 f64 c44 f65 c44 f66 c44' f64' c44' f65' c44' f66' 
sadi 0.005 c46 f67 c46 f68 c46 f69 c46' f67' c46' f68' c46' f69' 
sadi 0.005 c48 f70 c48 f71 c48 f72 c48 f70' c48 f71' c48 f72' 
  
SADI 0.005 o22 c43 O22 C43' 
SADI 0.005 C43 C44 C43' C44' 
  
SADI 0.005 C43 F64 C43 F65 C43 F66 C43' F64' C43' F65' C43' F66' 
SADI 0.005 O19 C37 O19' C37' 
SADI 0.005 C41 C42 C41 C42' 
SADI 0.005 C45 C46 C45 C46' 
dfix 2.671 0.005 p8 c43' 
  
sadi 0.005 p8 o22 p8 o23 p8 o24 
  
WGHT    0.024800  132.768585 
FVAR       0.01124   0.39054 
AU1   7    1.117673    0.129303    0.115747    11.00000    0.03112    0.02697 = 
         0.02639    0.00249    0.00313    0.00509 
BR1   6    1.104720    0.048671    0.152819    11.00000    0.03239    0.02981 = 
         0.03461    0.00526   -0.00677   -0.00282 
P1    5    1.140472    0.200297    0.079658    11.00000    0.05302    0.02850 = 
         0.03122    0.00481    0.00636    0.00803 
F1    4    1.246566    0.177518   -0.018647    11.00000    0.12473    0.07268 = 
         0.05061   -0.00869   -0.01121   -0.01107 
F2    4    1.398144    0.171860    0.006562    11.00000    0.08525    0.07276 = 
         0.05949    0.02793    0.02314    0.04018 
F3    4    1.356289    0.242436   -0.025951    11.00000    0.10206    0.06973 = 
         0.07869    0.03936    0.04102    0.02439 
F4    4    1.009849    0.291548    0.152348    11.00000    0.03516    0.05290 = 
         0.07053    0.00036    0.00423    0.00531 
F5    4    1.136390    0.318950    0.187322    11.00000    0.07960    0.04766 = 
         0.03635   -0.00540   -0.00568   -0.00173 
F6    4    1.110904    0.356209    0.134251    11.00000    0.06674    0.02470 = 
         0.04295    0.00888    0.00681    0.00961 
F7    4    1.023033    0.311154    0.014962    11.00000    0.05415    0.06416 = 
         0.11684    0.04958   -0.01545   -0.01502 
F8    4    0.857139    0.302005    0.019467    11.00000    0.05591    0.07366 = 
         0.05075    0.00183   -0.00892    0.00376 
F9    4    0.946184    0.244697   -0.012749    11.00000    0.08800    0.11938 = 
         0.03527   -0.02019   -0.02164    0.03046 
O1    3    1.245050    0.194171    0.057124    11.00000    0.05082    0.03154 = 
         0.04363    0.00325    0.01567   -0.00012 
O2    3    1.144500    0.258012    0.098198    11.00000    0.08305    0.02887 = 
         0.03265    0.01097    0.00166    0.00972 
O3    3    1.058734    0.212386    0.047161    11.00000    0.06965    0.04006 = 
         0.03950    0.00650    0.00155    0.01088 
C1    1    1.280189    0.233953    0.031650    11.00000    0.05974    0.03841 = 
         0.05007    0.01122    0.01378   -0.00861 
AFIX  23 
H1A   2    1.336299    0.256223    0.043286    11.00000   -1.20000 
H1B   2    1.221932    0.258694    0.024683    11.00000   -1.20000 
AFIX   0 
C2    1    1.319862    0.206644   -0.001653    11.00000    0.06988    0.03973 = 
         0.04653    0.01197    0.02198    0.00784 
C3    1    1.179168    0.267182    0.135983    11.00000    0.04254    0.03300 = 
         0.04146    0.01011    0.00606   -0.00694 
AFIX  23 
H3A   2    1.251813    0.280973    0.136485    11.00000   -1.20000 
H3B   2    1.176842    0.232546    0.150191    11.00000   -1.20000 
AFIX   0 
C4    1    1.107572    0.308543    0.152623    11.00000    0.02911    0.02716 = 
         0.04489   -0.00067   -0.00135   -0.00213 
C5    1    0.961607    0.240508    0.051006    11.00000    0.05157    0.06366 = 
         0.03767    0.01345    0.00018   -0.00048 
AFIX  23 
H5A   2    0.963301    0.263707    0.073494    11.00000   -1.20000 
H5B   2    0.903760    0.213895    0.053177    11.00000   -1.20000 
AFIX   0 
C6    1    0.946458    0.274524    0.017812    11.00000    0.03615    0.05715 = 
         0.03313    0.00639   -0.00721   -0.00491 
AU2   7    1.444457    0.525033    0.132781    11.00000    0.02673    0.02450 = 
         0.02814    0.00318   -0.00141   -0.00184 
BR2   6    1.426251    0.605241    0.170213    11.00000    0.02835    0.03164 = 
         0.03681   -0.00362   -0.00425    0.00041 
P2    5    1.470649    0.454225    0.096451    11.00000    0.02937    0.02670 = 
         0.03037    0.00194   -0.00007   -0.00418 
PART   1 
F10   4    1.233687    0.352909    0.059814    10.65000    0.07327 
F11   4    1.109320    0.410365    0.062094    10.65000    0.04206 
F12   4    1.231671    0.412972    0.018188    10.65000    0.08398 
PART   2 
F10'  4    1.241364    0.362972    0.033309    10.35000    0.07973 
F11'  4    1.115243    0.384504    0.059373    10.35000    0.09048 
F12'  4    1.200216    0.436123    0.023340    10.35000    0.02521 
PART   0 
F13   4    1.450699    0.342028    0.202218    11.00000    0.08159    0.05540 = 
         0.05087    0.03153    0.01861    0.01919 
F14   4    1.343514    0.375521    0.161923    11.00000    0.02995    0.03617 = 
         0.07019   -0.00882    0.00337    0.00038 
F15   4    1.437868    0.306356    0.148128    11.00000    0.04745    0.02476 = 
         0.07845   -0.00206    0.01336   -0.00558 
F16   4    1.741222    0.472524    0.029245    11.00000    0.03573    0.06317 = 
         0.05786    0.01242    0.00123   -0.00257 
F17   4    1.686219    0.417600   -0.012592    11.00000    0.06301    0.11103 = 
         0.06469   -0.02799    0.03238   -0.00969 
F18   4    1.610780    0.495338   -0.004182    11.00000    0.05425    0.10445 = 
         0.06271    0.05362    0.01146    0.01230 
O4    3    1.376611    0.434098    0.070389    11.00000    0.03488    0.06890 = 
         0.04980   -0.02287    0.00279   -0.00956 
O5    3    1.506776    0.399281    0.115342    11.00000    0.09293    0.02200 = 
         0.03518    0.00634    0.01062    0.00467 
O6    3    1.555735    0.464768    0.066511    11.00000    0.03495    0.02621 = 
         0.04115    0.00712    0.00090    0.00076 
C7    1    1.275643    0.437519    0.079586    11.00000    0.03613    0.09402 = 
         0.03340   -0.02232   -0.00674    0.01122 
AFIX  23 
H7A   2    1.253249    0.476306    0.078969    11.00000   -1.20000 
H7B   2    1.266757    0.423674    0.105116    11.00000   -1.20000 
AFIX   0 
C8    1    1.209664    0.405161    0.053634    11.00000    0.05189    0.03903 = 
         0.03645   -0.00120    0.00383   -0.02042 
C9    1    1.521130    0.391554    0.153936    11.00000    0.03067    0.02694 = 
         0.03915    0.00199   -0.00714   -0.00377 
AFIX  23 
H9A   2    1.516025    0.427028    0.167052    11.00000   -1.20000 
H9B   2    1.590819    0.375639    0.159233    11.00000   -1.20000 
AFIX   0 
C10   1    1.437909    0.353657    0.166493    11.00000    0.03126    0.02364 = 
         0.04438    0.00327    0.00843    0.00357 
C11   1    1.584345    0.425181    0.038481    11.00000    0.03348    0.04154 = 
         0.04172   -0.00141    0.00534   -0.00179 
AFIX  23 
H11A  2    1.521087    0.411606    0.025348    11.00000   -1.20000 
H11B  2    1.620346    0.393592    0.050166    11.00000   -1.20000 
AFIX   0 
C12   1    1.654390    0.452547    0.012073    11.00000    0.02326    0.06088 = 
         0.04267    0.01105    0.00343    0.00357 
AU3   7    1.157127    0.595354    0.146068    11.00000    0.01882    0.02173 = 
         0.02375   -0.00189    0.00027   -0.00154 
AU4   7    0.929393    0.582516    0.171122    11.00000    0.01804    0.02184 = 
         0.01735    0.00066    0.00040   -0.00078 
AU5   7    0.716853    0.578668    0.211305    11.00000    0.02001    0.01961 = 
         0.01947   -0.00105    0.00000    0.00062 
BR3   6    1.165338    0.498381    0.159204    11.00000    0.02757    0.02228 = 
         0.02970   -0.00221   -0.00064   -0.00012 
BR4   6    1.007823    0.610229    0.229185    11.00000    0.02613    0.03045 = 
         0.01847   -0.00124   -0.00055   -0.00357 
BR5   6    0.710825    0.482135    0.198824    11.00000    0.02699    0.02278 = 
         0.04473   -0.00883   -0.00050   -0.00050 
P3    5    1.150810    0.684290    0.135505    11.00000    0.01832    0.02480 = 
         0.02829   -0.00195    0.00138   -0.00278 
P4    5    0.874978    0.556793    0.115294    11.00000    0.02442    0.02217 = 
         0.01963    0.00076   -0.00072   -0.00231 
P5    5    0.697204    0.665361    0.226704    11.00000    0.01818    0.02237 = 
         0.02007    0.00003   -0.00156    0.00057 
F19   4    1.388616    0.706399    0.035494    11.00000    0.07565    0.10063 = 
         0.03339    0.00469    0.01345   -0.01421 
F20   4    1.252303    0.753659    0.049482    11.00000    0.08035    0.15792 = 
         0.05704    0.02116   -0.02546    0.04815 
F21   4    1.395634    0.768827    0.076552    11.00000    0.07940    0.06217 = 
         0.08026    0.00795    0.01321   -0.03434 
F25   4    1.219656    0.764336    0.258630    11.00000    0.06286    0.06161 = 
         0.03376   -0.01416   -0.01081    0.00201 
F26   4    1.063722    0.757379    0.237543    11.00000    0.04966    0.06544 = 
         0.05306   -0.01359    0.01774   -0.00305 
F27   4    1.167342    0.814247    0.213256    11.00000    0.08494    0.02586 = 
         0.04925   -0.00288    0.00528   -0.00616 
F28   4    1.103188    0.616410    0.042189    11.00000    0.03271    0.05580 = 
         0.03453    0.00322    0.00299   -0.00934 
F29   4    1.048882    0.563176   -0.000917    11.00000    0.04836    0.06356 = 
         0.02619   -0.00296    0.00586    0.00323 
F30   4    1.091913    0.530537    0.052830    11.00000    0.06148    0.05129 = 
         0.06067    0.01400    0.00382    0.02679 
F31   4    0.738072    0.420858    0.108079    11.00000    0.03131    0.05729 = 
         0.06163    0.00133   -0.01254   -0.00555 
F32   4    0.867669    0.388466    0.078714    11.00000    0.05996    0.04528 = 
         0.04980   -0.02484   -0.00171   -0.00002 
F33   4    0.840445    0.362821    0.134729    11.00000    0.08599    0.02650 = 
         0.05773    0.00895   -0.03379   -0.01186 
F34   4    0.713945    0.639927    0.050637    11.00000    0.04554    0.04580 = 
         0.03588    0.01011    0.00697    0.00154 
F35   4    0.587320    0.672064    0.082416    11.00000    0.03990    0.05279 = 
         0.05260   -0.00123   -0.00258    0.01547 
F36   4    0.580850    0.589725    0.061858    11.00000    0.05130    0.04947 = 
         0.04726    0.01177   -0.02599   -0.01329 
F37   4    0.846792    0.802686    0.269543    11.00000    0.07543    0.02828 = 
         0.04169    0.00422   -0.00097   -0.01336 
F38   4    0.702112    0.775502    0.290793    11.00000    0.04065    0.03147 = 
         0.05125   -0.01247   -0.01021    0.00716 
F39   4    0.840812    0.772132    0.325142    11.00000    0.05720    0.03760 = 
         0.03020   -0.00667   -0.02019   -0.00778 
F40   4    0.487694    0.753178    0.158826    11.00000    0.03559    0.05764 = 
         0.05767    0.02249   -0.01620   -0.00863 
F41   4    0.567289    0.830208    0.162008    11.00000    0.06410    0.02676 = 
         0.04234    0.00890   -0.00603    0.01260 
F42   4    0.629934    0.764108    0.130611    11.00000    0.07004    0.05373 = 
         0.02504    0.01327    0.00566    0.01769 
F43   4    0.434788    0.708215    0.295126    11.00000    0.04442    0.05025 = 
         0.04581   -0.01816    0.00413    0.01462 
F44   4    0.349180    0.644073    0.267338    11.00000    0.02398    0.05137 = 
         0.05159    0.00198    0.00918   -0.00461 
F45   4    0.428570    0.705133    0.235713    11.00000    0.03028    0.03716 = 
         0.03570    0.00934   -0.00354    0.00385 
O7    3    1.252949    0.712347    0.120333    11.00000    0.03623    0.02463 = 
         0.05785   -0.00543    0.00585   -0.00547 
O8    3    1.055566    0.701407    0.110503    11.00000    0.03223    0.02629 = 
         0.03779   -0.00350   -0.01171    0.00126 
O9    3    1.132568    0.723249    0.170402    11.00000    0.03801    0.03245 = 
         0.02819   -0.00623   -0.01171    0.00272 
O10   3    0.935013    0.591530    0.085592    11.00000    0.02601    0.03495 = 
         0.01952    0.00038    0.00129   -0.00445 
O11   3    0.897737    0.496307    0.102625    11.00000    0.05645    0.02540 = 
         0.02290   -0.00123    0.00068   -0.00102 
O12   3    0.753935    0.560632    0.104697    11.00000    0.02689    0.03065 = 
         0.03212    0.00371   -0.00464   -0.00434 
O13   3    0.791229    0.701867    0.240811    11.00000    0.02084    0.02906 = 
         0.02386    0.00062   -0.00330   -0.00164 
O14   3    0.656224    0.699963    0.192561    11.00000    0.02774    0.02287 = 
         0.02108   -0.00121   -0.00545   -0.00073 
O15   3    0.619165    0.674373    0.260005    11.00000    0.02104    0.01761 = 
         0.02716   -0.00315   -0.00057   -0.00039 
C13   1    1.312874    0.687612    0.091117    11.00000    0.03053    0.04097 = 
         0.04782    0.00217    0.01438   -0.00165 
AFIX  23 
H13A  2    1.272713    0.657211    0.079682    11.00000   -1.20000 
H13B  2    1.378754    0.672496    0.101507    11.00000   -1.20000 
AFIX   0 
C14   1    1.336336    0.729577    0.062668    11.00000    0.03507    0.05054 = 
         0.04623    0.00073   -0.00617   -0.00405 
C15   1    1.020532    0.757117    0.105758    11.00000    0.03538    0.02121 = 
         0.04142    0.00326   -0.00853   -0.00045 
AFIX  23 
H15A  2    1.046006    0.772244    0.082118    11.00000   -1.20000 
H15B  2    1.047054    0.780317    0.126324    11.00000   -1.20000 
AFIX   0 
C16   1    0.903817    0.755670    0.105586    11.00000    0.05088    0.03377 = 
         0.06308   -0.00014   -0.01930    0.01996 
PART   1 
F22   4    0.871458    0.806161    0.095535    10.60000    0.04937 
F23   4    0.874550    0.742251    0.140234    10.60000    0.05660 
F24   4    0.851592    0.720259    0.083657    10.60000    0.05206 
PART   2 
F22'  4    0.855159    0.804545    0.107636    10.40000    0.03095 
F23'  4    0.856334    0.725442    0.131583    10.40000    0.06043 
F24'  4    0.881863    0.729203    0.073442    10.40000    0.03836 
PART   0 
C17   1    1.199649    0.720675    0.202052    11.00000    0.03136    0.03388 = 
         0.03572    0.00190   -0.00721    0.00359 
AFIX  23 
H17A  2    1.272932    0.727404    0.195065    11.00000   -1.20000 
H17B  2    1.195188    0.684298    0.214020    11.00000   -1.20000 
AFIX   0 
C18   1    1.162243    0.764498    0.227550    11.00000    0.03343    0.03600 = 
         0.04627   -0.00585   -0.00398    0.00134 
C19   1    0.934349    0.579924    0.046393    11.00000    0.03188    0.03928 = 
         0.01752   -0.00489   -0.00267   -0.00631 
AFIX  23 
H19A  2    0.902704    0.610808    0.032463    11.00000   -1.20000 
H19B  2    0.892962    0.546512    0.041144    11.00000   -1.20000 
AFIX   0 
C20   1    1.045111    0.571737    0.034987    11.00000    0.04399    0.04269 = 
         0.02358    0.01481   -0.01007    0.00000 
C21   1    0.905394    0.450411    0.127295    11.00000    0.02273    0.01975 = 
         0.02929    0.00032   -0.00581    0.00085 
AFIX  23 
H21A  2    0.881319    0.460851    0.152244    11.00000   -1.20000 
H21B  2    0.978756    0.437973    0.129449    11.00000   -1.20000 
AFIX   0 
C22   1    0.838049    0.405400    0.111689    11.00000    0.04067    0.02547 = 
         0.03757    0.00170   -0.01606   -0.00498 
C23   1    0.696037    0.609006    0.111811    11.00000    0.02233    0.04916 = 
         0.02443   -0.00043   -0.00260    0.00465 
AFIX  23 
H23A  2    0.743261    0.638018    0.121332    11.00000   -1.20000 
H23B  2    0.642922    0.601597    0.130791    11.00000   -1.20000 
AFIX   0 
C24   1    0.643303    0.627825    0.076261    11.00000    0.03471    0.03075 = 
         0.03488   -0.00377    0.00296    0.00149 
C25   1    0.827860    0.707957    0.278086    11.00000    0.02942    0.02858 = 
         0.02454    0.00229   -0.01429   -0.00025 
AFIX  23 
H25A  2    0.903750    0.700531    0.279549    11.00000   -1.20000 
H25B  2    0.791970    0.681477    0.294282    11.00000   -1.20000 
AFIX   0 
C26   1    0.805992    0.766153    0.290967    11.00000    0.03406    0.02258 = 
         0.05039    0.00192   -0.00943   -0.01253 
C27   1    0.581353    0.776118    0.161901    11.00000    0.03737    0.03475 = 
         0.02835    0.00548   -0.00009    0.00671 
C28   1    0.639889    0.758520    0.195538    11.00000    0.03336    0.01650 = 
         0.03880    0.00012   -0.00634   -0.00115 
AFIX  23 
H28A  2    0.707739    0.777801    0.197243    11.00000   -1.20000 
H28B  2    0.599599    0.767055    0.217990    11.00000   -1.20000 
AFIX   0 
C29   1    0.531941    0.639143    0.266566    11.00000    0.02613    0.02152 = 
         0.02098   -0.00444    0.00091   -0.00167 
AFIX  23 
H29A  2    0.540419    0.620420    0.290747    11.00000   -1.20000 
H29B  2    0.526134    0.611037    0.246883    11.00000   -1.20000 
AFIX   0 
C30   1    0.436553    0.674706    0.266475    11.00000    0.02299    0.02843 = 
         0.03450    0.00217    0.00474   -0.00660 
AU6   7    1.101392    0.582272    0.314855    11.00000    0.02258    0.01687 = 
         0.02145   -0.00071   -0.00194    0.00200 
AU7   7    0.888944    0.583687    0.355644    11.00000    0.02587    0.02086 = 
         0.02140    0.00084   -0.00431    0.00209 
AU8   7    0.653983    0.573061    0.376669    11.00000    0.02676    0.03014 = 
         0.03011    0.00704   -0.00576   -0.00386 
BR6   6    1.107314    0.677370    0.331466    11.00000    0.03165    0.01893 = 
         0.04281   -0.00580    0.00458   -0.00188 
BR7   6    0.807924    0.557358    0.297707    11.00000    0.02766    0.02614 = 
         0.01991    0.00081   -0.00140   -0.00211 
BR8   6    0.637179    0.670697    0.367188    11.00000    0.02454    0.02797 = 
         0.03258   -0.00311    0.00041    0.00269 
P6    5    1.114381    0.495507    0.298969    11.00000    0.02115    0.01930 = 
         0.02049   -0.00237   -0.00205    0.00242 
P7    5    0.945877    0.608700    0.411122    11.00000    0.05643    0.02495 = 
         0.02672    0.00009   -0.01870    0.00833 
P8    5    0.672161    0.482779    0.382757    11.00000    0.03379    0.03408 = 
         0.05032    0.01229   -0.01258   -0.00451 
F49   4    1.455516    0.509365    0.250092    11.00000    0.02940    0.04962 = 
         0.05066    0.00306    0.01017    0.00384 
F50   4    1.379699    0.449278    0.284326    11.00000    0.03824    0.03376 = 
         0.03680    0.00408   -0.00389    0.00758 
F51   4    1.361878    0.445711    0.225146    11.00000    0.04755    0.05436 = 
         0.04465   -0.02167   -0.00398    0.02334 
PART   1 
F52   4    1.021420    0.359746    0.254008    10.60000    0.03738 
F53   4    0.865774    0.383043    0.263740    10.60000    0.02872 
F54   4    0.942146    0.390651    0.206633    10.60000    0.03950 
PART   2 
F52'  4    1.049450    0.377845    0.245856    10.40000    0.07227 
F53'  4    0.907897    0.360176    0.266335    10.40000    0.10320 
F54'  4    0.906145    0.388001    0.210106    10.40000    0.01829 
PART   1 
F55   4    1.206109    0.566822    0.476427    10.55000    0.05775 
F56   4    1.283654    0.523639    0.435740    10.55000    0.05955 
F57   4    1.142494    0.492489    0.459073    10.55000    0.04388 
PART   2 
F55'  4    1.263174    0.570171    0.457894    10.45000    0.05126 
F56'  4    1.234262    0.488537    0.441711    10.45000    0.05915 
F57'  4    1.127878    0.526165    0.474777    10.45000    0.04976 
PART   1 
F58   4    0.751247    0.651863    0.471896    21.00000    0.09683 
F59   4    0.790680    0.624133    0.525635    21.00000    0.06454 
F60   4    0.729104    0.567951    0.485874    21.00000    0.07795 
PART   2 
F58'  4    0.675406    0.632902    0.475958   -21.00000    0.05945 
F59'  4    0.738350    0.608273    0.527576   -21.00000    0.05896 
F60'  4    0.711535    0.547481    0.484775   -21.00000    0.05067 
PART   1 
F61   4    0.983486    0.781112    0.432292    10.50000    0.06575 
F62   4    0.858002    0.748387    0.460231    10.50000    0.10960 
F63   4    0.822355    0.795342    0.410914    10.50000    0.03451 
PART   2 
F61'  4    0.962320    0.777222    0.448942    10.50000    0.05194 
F62'  4    0.820127    0.736967    0.449811    10.50000    0.04926 
F63'  4    0.857536    0.802438    0.406001    10.50000    0.04482 
PART   1 
C43   1    0.627207    0.445582    0.316269    10.80000    0.03763 
AFIX  23 
H43A  2    0.659418    0.465054    0.295287    10.80000   -1.20000 
H43B  2    0.561330    0.464565    0.322252    10.80000   -1.20000 
AFIX   0 
eadp f64 f65 f66 
eadp f64' f65' f66' 
same c32 > f48 
C44   1    0.604493    0.389595    0.305482    10.80000    0.03768 
F64   4    0.561887    0.386357    0.271911    10.80000    0.09023 
F65   4    0.688413    0.358093    0.305933    10.80000    0.09023 
F66   4    0.544579    0.364064    0.329386    10.80000    0.09023 
PART   2 
C43'  1    0.630447    0.441168    0.315679    10.20000    0.13379 
AFIX  23 
H43C  2    0.670679    0.451955    0.293656    10.20000   -1.20000 
H43D  2    0.571338    0.467032    0.317719    10.20000   -1.20000 
AFIX   0 
same c32 > f48 
C44'  1    0.588402    0.386825    0.309300    10.20000    0.60648 
F64'  4    0.547723    0.380919    0.275663    10.20000    0.01448 
F65'  4    0.516869    0.373216    0.333641    10.20000    0.01448 
F66'  4    0.657840    0.347789    0.315665    10.20000    0.01448 
PART   1 10.45 
same c32 > f48 
C46   1    0.517735    0.423682    0.457482    10.45000    0.08735 
F67   4    0.613238    0.409078    0.467853    10.45000    0.11635 
F68   4    0.470528    0.378563    0.445834    10.45000    0.10744 
F69   4    0.472911    0.430873    0.489878    10.45000    0.19625 
PART   2 10.55 
same c32 > f48 
C46'  1    0.540244    0.433900    0.462072    10.55000    0.07611 
F67'  4    0.639594    0.439426    0.471620    10.55000    0.07992 
F68'  4    0.516422    0.382013    0.456047    10.55000    0.06758 
F69'  4    0.478940    0.452414    0.488336    10.55000    0.07471 
PART   1 
F70   4    0.965835    0.433844    0.386431    10.60000    0.04760 
F71   4    0.958602    0.450358    0.445598    10.60000    0.06480 
F72   4    0.964212    0.366514    0.419882    10.60000    0.03723 
PART   2 
F70'  4    0.982152    0.451910    0.398837    10.40000    0.04166 
F71'  4    0.931874    0.442316    0.451750    10.40000    0.04051 
F72'  4    0.961311    0.369872    0.431851    10.40000    0.04702 
PART   0 
O16   3    1.157156    0.460997    0.332919    11.00000    0.02528    0.01335 = 
         0.02672    0.00039   -0.00972    0.00322 
O17   3    1.185889    0.483392    0.264557    11.00000    0.02594    0.02492 = 
         0.02425   -0.00500    0.00246   -0.00020 
O18   3    1.015812    0.460513    0.287364    11.00000    0.02605    0.02365 = 
         0.02277    0.00168   -0.00521   -0.00416 
PART   1 
O19   3    1.070098    0.602608    0.417873    21.00000    0.03169 
O20   3    0.889933    0.574397    0.443022    21.00000    0.06363 
PART   2 
O19'  3    1.033887    0.575855    0.433960   -21.00000    0.02758 
O20'  3    0.851462    0.597711    0.439293   -21.00000    0.02544 
PART   0 
O21   3    0.968551    0.671245    0.418430    11.00000    0.03315    0.02484 = 
         0.02696   -0.00116   -0.01240   -0.00059 
O22   3    0.694972    0.447394    0.347106    11.00000    0.04813    0.04000 = 
         0.04554   -0.00178   -0.00077    0.00221 
O23   3    0.577722    0.448675    0.397589    11.00000    0.04098    0.03549 = 
         0.06833   -0.00124   -0.00362    0.00276 
O24   3    0.772574    0.469331    0.406575    11.00000    0.02897    0.03120 = 
         0.03285    0.00681   -0.01005   -0.00457 
C31   1    1.172428    0.402658    0.331079    11.00000    0.03367    0.01449 = 
         0.02719   -0.00674   -0.00451    0.00180 
AFIX  23 
H31A  2    1.207904    0.392808    0.307843    11.00000   -1.20000 
H31B  2    1.104292    0.383594    0.331528    11.00000   -1.20000 
AFIX   0 
C32   1    1.237265    0.386215    0.363474    11.00000    0.04659    0.02819 = 
         0.02635   -0.00008   -0.00547    0.00183 
F46   4    1.249411    0.332371    0.364272    11.00000    0.07670    0.02086 = 
         0.04870    0.01514   -0.00600    0.01189 
F47   4    1.332715    0.407898    0.362904    11.00000    0.04124    0.04695 = 
         0.08011    0.01861   -0.02638    0.00120 
F48   4    1.194809    0.400920    0.395178    11.00000    0.08641    0.05865 = 
         0.03017    0.00892   -0.00086    0.02981 
C33   1    1.275215    0.517293    0.255785    11.00000    0.03012    0.01947 = 
         0.02508    0.00063    0.00366   -0.00136 
AFIX  23 
H33A  2    1.286790    0.545191    0.275313    11.00000   -1.20000 
H33B  2    1.263421    0.536275    0.231855    11.00000   -1.20000 
AFIX   0 
C34   1    1.368141    0.479851    0.253507    11.00000    0.02625    0.03410 = 
         0.03239   -0.00664    0.00096    0.00566 
C35   1    0.974271    0.456415    0.250186    11.00000    0.02907    0.02350 = 
         0.03175   -0.00141   -0.01277    0.00027 
AFIX  23 
H35A  2    1.026038    0.469540    0.232155    11.00000   -1.20000 
H35B  2    0.910195    0.478785    0.247458    11.00000   -1.20000 
AFIX   0 
C36   1    0.950445    0.397949    0.243759    11.00000    0.07188    0.03153 = 
         0.03631   -0.00695   -0.01719    0.01344 
PART   1 
C37   1    1.119475    0.549171    0.414631    21.00000    0.03119 
PART   2 
C37'  1    1.132462    0.566719    0.415296   -21.00000    0.03587 
PART   0 
C38   1    1.189516    0.536419    0.446809    11.00000    0.03308    0.03128 = 
         0.02676    0.00224    0.00133    0.00969 
PART   1 
C39   1    0.903084    0.597857    0.479893    21.00000    0.03388 
AFIX  23 
H39A  2    0.945897    0.631575    0.479303    21.00000   -1.20000 
H39B  2    0.935694    0.571340    0.497281    21.00000   -1.20000 
AFIX   0 
C40   1    0.793397    0.610096    0.490181    21.00000    0.03887 
PART   2 
C39'  1    0.851949    0.605756    0.479302   -21.00000    0.02994 
AFIX  23 
H39C  2    0.877043    0.642992    0.485607   -21.00000   -1.20000 
H39D  2    0.898405    0.578708    0.491608   -21.00000   -1.20000 
AFIX   0 
C40'  1    0.742476    0.598314    0.491565   -21.00000    0.04189 
PART   0 
C41   1    0.910100    0.712996    0.399063    11.00000    0.02736    0.02467 = 
         0.02609   -0.00170   -0.00753    0.00082 
part 1 
AFIX  23 
H41A  2    0.843630    0.697670    0.389328    10.50000   -1.20000 
H41B  2    0.950625    0.726967    0.377938    10.50000   -1.20000 
AFIX  23 
part 2 
H41C  2    0.842582    0.698190    0.389902    10.50000   -1.20000 
H41D  2    0.949765    0.726703    0.377653    10.50000   -1.20000 
AFIX   0 
PART   1 
C42   1    0.889134    0.757443    0.425108    10.50000    0.11108 
PART   2 
C42'  1    0.892889    0.757191    0.425788    10.50000    0.02535 
PART   0 
C45   1    0.514661    0.467879    0.428743    11.00000    0.05897    0.04124 = 
         0.05385   -0.01008    0.00124    0.02001 
part 1 
AFIX  23 
H45A  2    0.441886    0.474755    0.420403    10.55000   -1.20000 
H45B  2    0.543863    0.502312    0.438996    10.55000   -1.20000 
AFIX  23 
part 2 
H45C  2    0.439502    0.464527    0.422405    10.45000   -1.20000 
H45D  2    0.530111    0.506868    0.433942    10.45000   -1.20000 
AFIX   0 
part 0 
  
C47   1    0.808668    0.414251    0.411431    11.00000    0.03514    0.03257 = 
         0.06191    0.00798   -0.01593   -0.00404 
AFIX  23 
H47A  2    0.793541    0.392361    0.388901    11.00000   -1.20000 
H47B  2    0.773589    0.396866    0.432653    11.00000   -1.20000 
AFIX   0 
C48   1    0.922812    0.417303    0.418457    11.00000    0.03751    0.03597 = 
         0.04992    0.01108   -0.00370    0.00021 
  
HKLF 4 
  
REM  abc in P2(1)/n 
REM R1 =  0.0463 for   18946 Fo > 4sig(Fo)  and  0.0764 for all   25952 data 
REM   1474 parameters refined using    237 restraints 
  
END 
  
WGHT      0.0246    133.0125 
  
REM Highest difference peak  4.764,  deepest hole -2.187,  1-sigma level  0.238 
Q1    1   0.6259  0.5939  0.3910  11.00000  0.05    4.76 
Q2    1   0.6422  0.5006  0.4023  11.00000  0.05    3.15 
Q3    1   1.1782  0.5753  0.1302  11.00000  0.05    2.59 
Q4    1   0.9127  0.5828  0.4374  11.00000  0.05    2.25 
Q5    1   1.0954  0.3801  0.2423  11.00000  0.05    2.10 
Q6    1   0.9593  0.5623  0.1575  11.00000  0.05    1.94 
Q7    1   1.2192  0.5926  0.1398  11.00000  0.05    1.92 
Q8    1   1.1726  0.6136  0.1295  11.00000  0.05    1.90 
Q9    1   0.9888  0.5761  0.1596  11.00000  0.05    1.75 
Q10   1   0.6377  0.3989  0.2867  11.00000  0.05    1.73 
Q11   1   1.0650  0.1249  0.0960  11.00000  0.05    1.71 
Q12   1   0.6084  0.4504  0.3700  11.00000  0.05    1.69 
Q13   1   1.1723  0.5577  0.4883  11.00000  0.05    1.66 
Q14   1   0.7388  0.6028  0.1962  11.00000  0.05    1.66 
Q15   1   0.8463  0.5892  0.3664  11.00000  0.05    1.65 
Q16   1   1.4146  0.5473  0.1458  11.00000  0.05    1.65 
Q17   1   0.9614  0.3600  0.2567  11.00000  0.05    1.64 
Q18   1   1.1237  0.1654  0.1179  11.00000  0.05    1.60 
Q19   1   1.0891  0.5614  0.3307  11.00000  0.05    1.58 
Q20   1   0.6394  0.5477  0.3898  11.00000  0.05    1.57 
; 
_shelx_res_checksum   60561 
  
_shelx_hkl_file 
; 
   1   0   0   -0.11    0.06 
   1   0   0    0.06    0.07 
   1   0   0    0.02    0.08 
  -1   0   0   -0.01    0.07 
   1   0   0    0.04    0.08 
   1   0   0   -0.01    0.06 
  -1   0   0    0.19    0.09 
   2   0   0    0.44    0.15 
   2   0   0    0.58    0.17 
   2   0   0    0.36    0.14 
   2   0   0   -0.11    0.16 
   2   0   0    0.22    0.15 
   2   0   0    0.35    0.13 
  -2   0   0    0.31    0.14 
   3   0   0   -0.15    0.16 
   3   0   0    0.48    0.22 
   3   0   0   -0.13    0.22 
   3   0   0   -0.10    0.17 
  -3   0   0    0.50    0.19 
   3   0   0    0.07    0.20 
   3   0   0    0.31    0.21 
   4   0   0  295.64   24.21 
   4   0   0  293.66   24.21 
   4   0   0  287.27   24.20 
   4   0   0  272.09   24.20 
  -4   0   0  296.10   24.20 
   4   0   0  294.35   24.20 
   4   0   0  284.12   24.20 
   5   0   0   -0.32    0.21 
   5   0   0   -0.19    0.26 
   5   0   0   -0.07    0.25 
   5   0   0    0.09    0.27 
   5   0   0    0.06    0.20 
  -5   0   0   -0.45    0.21 
   6   0   0    6.55    0.77 
   6   0   0    7.67    0.77 
   6   0   0    6.52    0.71 
   6   0   0    7.40    0.74 
  -6   0   0    8.21    0.73 
   6   0   0    7.80    0.75 
  -7   0   0   -0.62    0.24 
  -7   0   0   -0.09    0.28 
   7   0   0   -0.01    0.27 
   7   0   0    0.10    0.25 
   7   0   0    0.21    0.23 
   7   0   0   -0.03    0.32 
   7   0   0    0.32    0.31 
   8   0   0    1.91    0.30 
   8   0   0    1.92    0.33 
   8   0   0    0.68    0.38 
   8   0   0    0.24    0.35 
  -8   0   0    1.88    0.32 
  -8   0   0    0.76    0.34 
   9   0   0    0.10    0.28 
   9   0   0   -0.20    0.37 
  -9   0   0   -0.28    0.29 
  -9   0   0    0.10    0.36 
   9   0   0   -0.19    0.29 
   9   0   0    0.77    0.40 
 -10   0   0    0.54    0.33 
 -10   0   0    0.15    0.37 
  10   0   0   -0.18    0.41 
  10   0   0   -0.18    0.30 
  10   0   0   -0.13    0.46 
  10   0   0   -0.28    0.32 
 -11   0   0    0.03    0.36 
  11   0   0   -0.60    0.46 
  11   0   0    0.04    0.36 
  11   0   0   -0.67    0.31 
  11   0   0   -0.08    0.47 
 -11   0   0   -0.13    0.42 
  12   0   0   -0.05    0.52 
  12   0   0    1.49    0.43 
 -12   0   0   -0.04    0.46 
  12   0   0   -0.19    0.38 
  12   0   0    1.39    0.55 
 -12   0   0    0.84    0.40 
  13   0   0   -0.31    0.39 
 -13   0   0   -0.35    0.40 
  13   0   0    0.26    0.57 
  13   0   0    0.30    0.42 
  13   0   0   -0.03    0.56 
 -13   0   0    1.20    0.53 
  14   0   0    0.98    0.66 
  14   0   0    2.73    0.52 
 -14   0   0    2.51    0.63 
 -14   0   0    1.80    0.52 
  15   0   0   -0.15    0.48 
  15   0   0   -0.89    0.65 
 -15   0   0    0.95    0.60 
  16   0   0    1.47    0.74 
 -16   0   0    1.50    0.67 
 -17   0   0    0.53    0.66 
  17   0   0   -0.82    0.78 
   0  -1   0   -0.01    0.06 
   0   1   0    0.00    0.05 
   1  -1   0    6.47    0.49 
   1  -1   0    6.59    0.49 
  -1  -1   0    4.51    0.48 
   1  -1   0    4.40    0.49 
   1  -1   0    6.06    0.48 
   1  -1   0    5.68    0.49 
   1   1   0    5.07    0.48 
   1   1   0    5.63    0.48 
   1   1   0    5.38    0.48 
   1   1   0    6.18    0.50 
   2  -1   0   -0.07    0.14 
   2  -1   0    0.05    0.13 
   2  -1   0    0.04    0.18 
  -2  -1   0   -0.16    0.13 
   2  -1   0   -0.06    0.17 
   2  -1   0   -0.02    0.12 
   2  -1   0    0.11    0.15 
  -2  -1   0   -0.19    0.17 
   2   1   0   -0.24    0.15 
   2   1   0    0.21    0.14 
   2   1   0    0.04    0.13 
   2   1   0    0.17    0.18 
   2   1   0    0.25    0.15 
   2   1   0    0.13    0.13 
   3  -1   0    0.01    0.21 
   3  -1   0   -0.11    0.21 
   3  -1   0   -0.09    0.17 
   3  -1   0   -0.16    0.22 
   3  -1   0    0.13    0.16 
   3  -1   0    0.12    0.21 
  -3  -1   0    0.00    0.17 
  -3  -1   0   -0.04    0.21 
   3   1   0    0.09    0.17 
   3   1   0   -0.02    0.18 
   3   1   0   -0.16    0.24 
   3   1   0   -0.33    0.20 
   3   1   0   -0.02    0.18 
   4  -1   0   27.75    2.09 
  -4  -1   0   23.91    2.06 
   4  -1   0   26.87    2.09 
  -4  -1   0   25.64    2.09 
   4  -1   0   22.10    2.06 
   4  -1   0   20.50    2.08 
   4  -1   0   25.34    2.07 
   4  -1   0   23.22    2.05 
   4   1   0   20.27    2.06 
   4   1   0   23.04    2.06 
   4   1   0   21.60    2.06 
   4   1   0   28.86    2.08 
   4   1   0   26.31    2.09 
  -5  -1   0   24.87    2.21 
   5  -1   0   22.72    2.21 
  -5  -1   0   27.57    2.19 
   5  -1   0   24.40    2.20 
   5  -1   0   27.64    2.19 
   5  -1   0   23.44    2.20 
   5  -1   0   26.52    2.18 
   5  -1   0   27.12    2.21 
   5   1   0   23.67    2.21 
   5   1   0   26.90    2.19 
   5   1   0   27.16    2.19 
  -5   1   0   26.80    2.20 
   5   1   0   26.13    2.19 
   5   1   0   22.51    2.20 
  -6  -1   0   -0.16    0.22 
   6  -1   0    0.41    0.30 
   6  -1   0    0.27    0.30 
   6  -1   0    0.00    0.27 
   6  -1   0    0.57    0.27 
   6  -1   0    0.34    0.24 
  -6  -1   0    0.06    0.27 
   6  -1   0    0.51    0.21 
   6   1   0    0.17    0.32 
   6   1   0   -0.07    0.28 
   6   1   0    0.00    0.25 
  -6   1   0   -0.05    0.23 
   6   1   0    0.21    0.23 
   6   1   0    0.04    0.24 
  -7  -1   0    6.51    0.68 
   7  -1   0    6.20    0.65 
   7  -1   0    6.39    0.66 
   7  -1   0    5.72    0.67 
   7  -1   0    6.12    0.68 
  -7  -1   0    6.34    0.67 
   7  -1   0    7.11    0.71 
   7   1   0    6.43    0.66 
  -7   1   0    6.38    0.68 
   7   1   0    6.06    0.69 
   7   1   0    6.08    0.67 
   7   1   0    6.18    0.67 
   8  -1   0    5.36    0.65 
   8  -1   0    5.54    0.60 
  -8  -1   0    5.47    0.64 
  -8  -1   0    5.45    0.60 
   8  -1   0    5.75    0.59 
   8  -1   0    5.18    0.65 
   8   1   0    5.73    0.67 
  -8   1   0    5.99    0.61 
   8   1   0    6.15    0.61 
   8   1   0    5.52    0.59 
   8   1   0    6.43    0.65 
  -9  -1   0   -0.10    0.29 
  -9  -1   0    0.02    0.35 
   9  -1   0    0.41    0.37 
   9  -1   0   -0.33    0.37 
   9  -1   0    0.63    0.31 
   9  -1   0   -0.27    0.26 
   9   1   0   -0.11    0.37 
   9   1   0    0.57    0.28 
  -9   1   0   -0.01    0.30 
   9   1   0   -0.73    0.40 
  -9   1   0   -0.57    0.33 
   9   1   0    0.29    0.31 
 -10  -1   0    0.09    0.42 
  10  -1   0    0.80    0.32 
 -10  -1   0    0.62    0.33 
  10  -1   0    0.60    0.35 
  10  -1   0    0.61    0.43 
  10  -1   0    0.29    0.45 
 -10   1   0    0.82    0.35 
  10   1   0   -0.43    0.46 
 -10   1   0    0.97    0.39 
  10   1   0    0.88    0.44 
  10   1   0    0.59    0.34 
  10   1   0    0.59    0.33 
 -11  -1   0   32.55    2.84 
  11  -1   0   30.88    2.85 
 -11  -1   0   32.95    2.79 
  11  -1   0   32.84    2.80 
  11  -1   0   32.41    2.86 
  11  -1   0   31.26    2.78 
  11   1   0   31.25    2.85 
  11   1   0   31.45    2.83 
 -11   1   0   30.63    2.83 
  11   1   0   32.53    2.78 
  11   1   0   31.52    2.79 
 -11   1   0   33.15    2.80 
  12  -1   0    1.56    0.57 
 -12  -1   0    1.42    0.52 
  12  -1   0    1.12    0.41 
  12  -1   0    1.69    0.42 
  12  -1   0    1.67    0.58 
 -12  -1   0    1.50    0.44 
  12   1   0    1.23    0.46 
 -12   1   0    1.60    0.53 
  12   1   0    0.78    0.55 
  12   1   0    1.26    0.56 
  12   1   0    1.85    0.42 
 -12   1   0    1.92    0.44 
 -13  -1   0    0.40    0.54 
 -13  -1   0   -0.56    0.41 
  13  -1   0    0.76    0.57 
  13  -1   0    0.36    0.40 
  13  -1   0    0.26    0.57 
  13   1   0    0.86    0.42 
  13   1   0    0.41    0.59 
 -13   1   0   -0.50    0.41 
  13   1   0   -0.17    0.44 
  13   1   0    0.24    0.55 
 -13   1   0    0.97    0.48 
 -14  -1   0    4.86    0.76 
 -14  -1   0    4.10    0.67 
  14  -1   0    5.30    0.68 
  14  -1   0    6.07    0.87 
 -14   1   0    5.02    0.69 
 -14   1   0    3.65    0.73 
  14   1   0    5.24    0.68 
  14   1   0    4.71    0.86 
  14   1   0    4.51    0.69 
 -15  -1   0    2.45    0.65 
  15  -1   0    2.44    0.76 
  15  -1   0    1.98    0.54 
 -15   1   0    2.63    0.72 
  15   1   0    1.38    0.55 
 -15   1   0    2.26    0.66 
  15   1   0    3.18    0.77 
 -16  -1   0    0.86    0.67 
  16  -1   0    0.35    0.72 
 -16   1   0    0.41    0.63 
  16   1   0    0.53    0.74 
  17  -1   0    0.21    0.81 
 -17  -1   0    0.58    0.68 
  17   1   0   -0.40    0.80 
 -17   1   0    0.67    0.65 
   0  -2   0  168.57   15.37 
   0   2   0  198.56   15.37 
   1  -2   0    2.99    0.30 
   1  -2   0    2.12    0.25 
   1  -2   0    2.42    0.26 
   1  -2   0    2.37    0.26 
  -1  -2   0    2.41    0.24 
  -1  -2   0    2.90    0.26 
  -1   2   0    2.73    0.29 
   1   2   0    2.44    0.26 
   1   2   0    2.08    0.25 
   1   2   0    2.30    0.25 
   1   2   0    2.76    0.28 
   2  -2   0    0.02    0.16 
   2  -2   0    0.41    0.20 
   2  -2   0    0.37    0.21 
  -2  -2   0    0.09    0.19 
   2  -2   0    0.04    0.14 
   2  -2   0    0.09    0.16 
  -2  -2   0   -0.09    0.13 
  -2  -2   0    0.21    0.10 
   2   2   0    0.08    0.17 
   2   2   0    0.05    0.19 
   2   2   0   -0.08    0.17 
   2   2   0   -0.04    0.15 
   2   2   0   -0.10    0.14 
   2   2   0   -0.02    0.11 
  -3  -2   0   77.21    6.25 
  -3  -2   0   73.26    6.24 
   3  -2   0   68.97    6.25 
   3  -2   0   75.49    6.25 
   3  -2   0   75.77    6.25 
   3  -2   0   72.29    6.24 
   3  -2   0   74.14    6.24 
   3  -2   0   81.42    6.26 
   3   2   0   83.80    6.25 
   3   2   0   77.66    6.26 
   3   2   0   66.04    6.23 
   3   2   0   70.53    6.25 
   3   2   0   70.59    6.24 
   4  -2   0    1.28    0.26 
   4  -2   0    1.25    0.29 
   4  -2   0    1.61    0.27 
   4  -2   0    0.98    0.29 
  -4  -2   0    1.02    0.22 
   4  -2   0    1.47    0.22 
  -4  -2   0    1.21    0.30 
   4  -2   0    0.74    0.22 
   4   2   0    1.16    0.31 
   4   2   0    1.10    0.26 
   4   2   0    1.12    0.22 
   4   2   0    0.53    0.23 
   4   2   0    1.14    0.27 
  -5  -2   0    2.42    0.31 
  -5  -2   0    1.69    0.36 
   5  -2   0    2.36    0.31 
   5  -2   0    1.76    0.36 
   5  -2   0    2.65    0.35 
   5  -2   0    2.63    0.30 
   5  -2   0    2.10    0.35 
   5  -2   0    2.25    0.36 
   5   2   0    1.95    0.31 
   5   2   0    2.43    0.33 
   5   2   0    2.23    0.35 
   5   2   0    2.74    0.39 
   5   2   0    2.55    0.31 
   6  -2   0    6.36    0.72 
  -6  -2   0    7.34    0.71 
  -6  -2   0    6.51    0.65 
   6  -2   0    6.21    0.63 
   6  -2   0    5.97    0.67 
   6  -2   0    6.79    0.66 
   6  -2   0    5.89    0.65 
   6  -2   0    5.96    0.65 
   6   2   0    6.04    0.70 
   6   2   0    6.06    0.63 
  -6   2   0    6.11    0.65 
   6   2   0    6.88    0.68 
   6   2   0    6.16    0.65 
   6   2   0    5.93    0.66 
   7  -2   0    2.76    0.46 
   7  -2   0    3.77    0.46 
   7  -2   0    3.19    0.44 
  -7  -2   0    3.73    0.40 
   7  -2   0    2.95    0.40 
   7  -2   0    3.35    0.39 
  -7  -2   0    3.02    0.47 
   7  -2   0    3.10    0.45 
   7   2   0    2.66    0.47 
   7   2   0    3.61    0.46 
   7   2   0    2.83    0.40 
   7   2   0    3.14    0.42 
  -7   2   0    3.29    0.43 
  -8  -2   0    7.89    0.84 
   8  -2   0    8.25    0.80 
   8  -2   0    7.73    0.84 
   8  -2   0    8.16    0.83 
   8  -2   0    8.11    0.89 
  -8  -2   0    7.77    0.81 
   8   2   0    8.32    0.91 
  -8   2   0    7.92    0.84 
   8   2   0    8.42    0.82 
   8   2   0    8.42    0.84 
   8   2   0    8.72    0.86 
  -9  -2   0    0.75    0.31 
   9  -2   0    1.45    0.30 
   9  -2   0    0.38    0.40 
   9  -2   0    1.11    0.32 
  -9  -2   0    1.13    0.39 
   9  -2   0    0.97    0.39 
   9   2   0    1.23    0.33 
   9   2   0    0.42    0.41 
  -9   2   0    1.12    0.34 
   9   2   0    0.62    0.38 
   9   2   0    0.98    0.35 
 -10  -2   0    0.26    0.32 
  10  -2   0    0.20    0.44 
 -10  -2   0   -0.33    0.41 
  10  -2   0   -0.02    0.31 
  10  -2   0    0.10    0.30 
  10  -2   0    0.31    0.42 
  10   2   0    0.37    0.32 
  10   2   0    0.64    0.43 
 -10   2   0    0.33    0.34 
  10   2   0   -0.73    0.43 
  10   2   0    0.55    0.35 
 -10   2   0    0.61    0.37 
 -11  -2   0    0.25    0.43 
 -11  -2   0    0.19    0.36 
  11  -2   0    0.16    0.33 
  11  -2   0   -0.12    0.48 
  11  -2   0    0.48    0.47 
  11  -2   0   -0.34    0.32 
  11   2   0   -0.03    0.35 
  11   2   0   -0.97    0.45 
 -11   2   0   -0.27    0.40 
  11   2   0    0.11    0.40 
 -11   2   0    0.06    0.37 
  11   2   0    0.21    0.52 
  12  -2   0    0.02    0.52 
  12  -2   0   -0.19    0.36 
 -12  -2   0   -0.34    0.38 
  12  -2   0   -0.10    0.53 
 -12  -2   0   -0.09    0.46 
 -12   2   0    0.33    0.45 
  12   2   0   -0.28    0.56 
  12   2   0   -0.23    0.40 
  12   2   0    0.15    0.40 
 -12   2   0    0.25    0.40 
  12   2   0    0.12    0.48 
  13  -2   0    8.18    1.00 
  13  -2   0    7.56    0.86 
 -13  -2   0    7.66    0.88 
  13  -2   0    9.71    1.04 
 -13  -2   0    8.79    0.99 
  13   2   0    8.06    1.02 
  13   2   0    9.22    1.00 
  13   2   0    8.04    0.88 
  13   2   0    7.05    0.90 
 -13   2   0    6.81    0.92 
 -13   2   0    8.36    0.90 
  14  -2   0    0.13    0.42 
  14  -2   0    0.65    0.62 
 -14  -2   0    0.31    0.59 
  14  -2   0   -0.45    0.67 
  14   2   0    0.77    0.49 
  14   2   0    0.69    0.66 
  14   2   0    0.51    0.46 
 -14   2   0   -0.19    0.45 
 -14   2   0   -0.61    0.52 
 -14   2   0   -0.03    0.56 
  15  -2   0    1.23    0.74 
 -15  -2   0    1.85    0.62 
  15  -2   0    1.50    0.50 
  15   2   0    1.37    0.53 
  15   2   0    1.37    0.54 
 -15   2   0    0.59    0.51 
  15   2   0    1.03    0.76 
 -15   2   0    1.09    0.59 
  16  -2   0    0.56    0.75 
 -16  -2   0    0.78    0.66 
  16   2   0    0.64    0.54 
  16   2   0   -0.04    0.73 
 -16   2   0    1.39    0.65 
 -17  -2   0    2.00    0.75 
  17  -2   0    1.85    0.84 
 -17   2   0    1.29    0.69 
  17   2   0    1.18    0.86 
   0  -3   0    0.02    0.19 
   0  -3   0    0.31    0.11 
   0  -3   0    0.45    0.15 
   0   3   0    0.36    0.14 
   0   3   0    0.23    0.23 
   0   3   0    0.41    0.16 
   1  -3   0    3.66    0.36 
  -1  -3   0    3.62    0.34 
   1  -3   0    3.88    0.39 
  -1  -3   0    3.41    0.38 
   1  -3   0    3.84    0.39 
   1   3   0    3.72    0.36 
  -1   3   0    3.37    0.38 
   1   3   0    3.18    0.36 
   1   3   0    3.07    0.31 
   1   3   0    3.27    0.37 
  -1   3   0    3.67    0.33 
   1   3   0    3.94    0.38 
  -2  -3   0    0.22    0.14 
   2  -3   0    0.07    0.23 
   2  -3   0    0.18    0.17 
   2  -3   0    0.33    0.22 
   2  -3   0    0.20    0.19 
  -2  -3   0    0.31    0.21 
   2   3   0   -0.06    0.17 
  -2   3   0    0.04    0.22 
   2   3   0    0.06    0.21 
   2   3   0    0.38    0.18 
   2   3   0   -0.39    0.19 
   2   3   0   -0.07    0.17 
  -3  -3   0   16.13    1.42 
   3  -3   0   15.37    1.46 
  -3  -3   0   16.89    1.46 
   3  -3   0   16.47    1.42 
   3  -3   0   17.14    1.44 
   3  -3   0   16.64    1.45 
   3  -3   0   16.57    1.46 
   3   3   0   17.30    1.46 
   3   3   0   18.38    1.45 
   3   3   0   15.05    1.41 
   3   3   0   15.89    1.44 
  -3   3   0   17.45    1.46 
   3   3   0   17.09    1.45 
  -4  -3   0   98.44    7.98 
   4  -3   0   89.60    7.97 
   4  -3   0   95.15    7.96 
   4  -3   0   94.65    7.97 
   4  -3   0   96.67    7.97 
   4  -3   0   99.76    7.98 
  -4  -3   0   92.89    7.95 
   4   3   0   93.26    7.96 
   4   3   0   92.57    7.97 
   4   3   0   88.17    7.95 
   4   3   0   94.61    7.98 
   4   3   0  102.27    7.97 
   5  -3   0    2.01    0.28 
   5  -3   0    1.84    0.36 
  -5  -3   0    1.92    0.36 
   5  -3   0    2.04    0.37 
   5  -3   0    1.59    0.33 
   5  -3   0    1.49    0.33 
  -5  -3   0    2.11    0.28 
   5   3   0    2.17    0.34 
   5   3   0    2.10    0.33 
   5   3   0    2.11    0.30 
   5   3   0    2.01    0.37 
   5   3   0    2.41    0.27 
   6  -3   0    1.66    0.32 
   6  -3   0    1.48    0.31 
  -6  -3   0    1.24    0.34 
  -6  -3   0    0.89    0.24 
   6  -3   0    1.53    0.35 
   6  -3   0    1.09    0.24 
   6  -3   0    0.73    0.24 
   6  -3   0    0.32    0.33 
   6   3   0    0.95    0.30 
   6   3   0    1.25    0.27 
   6   3   0    1.44    0.31 
   6   3   0    1.20    0.36 
   7  -3   0    6.83    0.69 
  -7  -3   0    6.39    0.70 
   7  -3   0    6.71    0.71 
   7  -3   0    6.08    0.67 
   7  -3   0    7.00    0.74 
   7  -3   0    7.10    0.70 
  -7  -3   0    6.28    0.66 
   7  -3   0    6.54    0.66 
   7   3   0    6.16    0.72 
   7   3   0    6.90    0.69 
   7   3   0    6.39    0.71 
   7   3   0    6.31    0.67 
  -8  -3   0   22.49    1.92 
   8  -3   0   22.51    1.92 
   8  -3   0   21.82    1.91 
   8  -3   0   21.57    1.95 
   8  -3   0   20.91    1.95 
  -8  -3   0   23.39    1.97 
   8  -3   0   20.66    1.98 
   8   3   0   21.44    1.98 
   8   3   0   22.74    1.94 
   8   3   0   22.69    1.93 
  -8   3   0   22.83    1.95 
   8   3   0   21.24    1.95 
  -9  -3   0   -0.22    0.28 
   9  -3   0    0.85    0.42 
  -9  -3   0    0.10    0.39 
   9  -3   0    0.20    0.33 
   9  -3   0    0.34    0.37 
   9  -3   0    0.01    0.27 
   9   3   0   -0.31    0.31 
   9   3   0   -0.17    0.29 
   9   3   0   -0.07    0.36 
   9   3   0    0.46    0.42 
  -9   3   0   -0.37    0.30 
 -10  -3   0    2.86    0.42 
 -10  -3   0    2.25    0.53 
  10  -3   0    2.10    0.51 
  10  -3   0    2.44    0.41 
  10  -3   0    2.18    0.53 
  10   3   0    1.47    0.54 
 -10   3   0    3.74    0.48 
  10   3   0    3.23    0.47 
  10   3   0    2.58    0.52 
  10   3   0    2.77    0.44 
  11  -3   0   -0.37    0.51 
  11  -3   0    0.97    0.35 
 -11  -3   0    1.68    0.48 
  11  -3   0    0.90    0.49 
 -11  -3   0    0.52    0.37 
 -11   3   0    1.34    0.40 
  11   3   0    0.63    0.48 
  11   3   0    0.91    0.41 
  11   3   0    1.04    0.53 
 -11   3   0    0.47    0.41 
  11   3   0    1.54    0.40 
 -12  -3   0    1.03    0.55 
  12  -3   0    0.89    0.57 
  12  -3   0    1.69    0.40 
 -12  -3   0    1.06    0.43 
  12  -3   0    0.91    0.56 
 -12   3   0    0.67    0.49 
  12   3   0    1.36    0.42 
  12   3   0    1.78    0.46 
 -12   3   0    1.47    0.44 
 -12   3   0    0.77    0.47 
  12   3   0   -0.08    0.59 
  12   3   0    0.24    0.51 
 -13  -3   0    0.32    0.53 
  13  -3   0    0.82    0.40 
  13  -3   0    0.80    0.59 
 -13  -3   0   -0.54    0.41 
  13  -3   0   -0.10    0.59 
  13   3   0    0.41    0.44 
 -13   3   0    1.85    0.51 
  13   3   0    0.79    0.64 
  13   3   0    0.31    0.60 
 -13   3   0    0.07    0.50 
  13   3   0    0.19    0.46 
 -13   3   0    0.53    0.44 
 -14  -3   0   21.18    2.17 
  14  -3   0   21.94    2.21 
  14  -3   0   22.29    2.06 
  14  -3   0   21.85    2.24 
 -14   3   0   23.56    2.11 
 -14   3   0   21.04    2.14 
 -14   3   0   22.76    2.14 
  14   3   0   24.72    2.14 
  14   3   0   23.00    2.26 
  14   3   0   24.61    2.09 
  15  -3   0    0.58    0.70 
 -15  -3   0    1.38    0.64 
  15   3   0    0.81    0.56 
 -15   3   0    0.70    0.49 
  15   3   0    0.12    0.50 
 -15   3   0    0.11    0.52 
  15   3   0    0.42    0.76 
 -16  -3   0    0.58    0.66 
  16  -3   0    0.08    0.72 
  16   3   0   -0.21    0.53 
  16   3   0    0.65    0.75 
  16   3   0    0.07    0.53 
 -16   3   0   -0.32    0.57 
   0  -4   0   55.34    4.64 
   0  -4   0   55.52    4.66 
   0  -4   0   51.37    4.63 
   0   4   0   63.32    4.67 
   0   4   0   51.41    4.64 
   1  -4   0   31.43    2.66 
   1  -4   0   29.89    2.66 
   1  -4   0   33.32    2.65 
  -1  -4   0   31.06    2.65 
  -1  -4   0   32.94    2.67 
   1   4   0   34.63    2.67 
  -1   4   0   29.01    2.64 
   1   4   0   29.36    2.66 
   1   4   0   31.20    2.66 
   2  -4   0    5.05    0.52 
  -2  -4   0    5.70    0.50 
   2  -4   0    4.84    0.55 
   2  -4   0    4.14    0.51 
   2  -4   0    5.81    0.59 
  -2  -4   0    5.22    0.56 
   2   4   0    4.97    0.52 
  -2   4   0    5.37    0.53 
   2   4   0    4.75    0.55 
   2   4   0    4.98    0.54 
  -3  -4   0    6.38    0.62 
   3  -4   0    5.40    0.60 
   3  -4   0    5.07    0.57 
   3  -4   0    4.68    0.55 
  -3  -4   0    6.48    0.53 
   3  -4   0    5.23    0.56 
   3   4   0    5.30    0.59 
   3   4   0    5.19    0.57 
   3   4   0    5.70    0.58 
  -3   4   0    5.25    0.57 
   3   4   0    5.92    0.58 
   4  -4   0   28.50    2.31 
  -4  -4   0   27.38    2.33 
   4  -4   0   26.04    2.32 
  -4  -4   0   27.50    2.29 
   4  -4   0   26.62    2.34 
   4  -4   0   26.88    2.34 
   4   4   0   27.23    2.33 
   4   4   0   27.39    2.31 
  -4   4   0   27.23    2.32 
   4   4   0   26.62    2.31 
   4   4   0   25.85    2.27 
   4   4   0   26.47    2.31 
   5  -4   0    6.44    0.64 
   5  -4   0    6.67    0.69 
   5  -4   0    6.50    0.67 
  -5  -4   0    6.69    0.67 
   5  -4   0    6.94    0.64 
   5  -4   0    6.89    0.67 
  -5  -4   0    6.40    0.62 
   5   4   0    6.69    0.66 
   5   4   0    5.77    0.64 
  -5   4   0    5.43    0.65 
   5   4   0    5.93    0.67 
   5   4   0    6.60    0.68 
  -6  -4   0    2.67    0.40 
   6  -4   0    2.19    0.41 
   6  -4   0    1.98    0.37 
   6  -4   0    2.33    0.42 
   6  -4   0    2.69    0.37 
  -6  -4   0    2.33    0.31 
   6  -4   0    2.00    0.31 
   6   4   0    2.71    0.38 
   6   4   0    1.98    0.33 
   6   4   0    2.44    0.37 
   6   4   0    2.74    0.43 
  -7  -4   0    0.90    0.25 
   7  -4   0    0.92    0.25 
   7  -4   0    0.59    0.37 
  -7  -4   0    1.03    0.36 
   7  -4   0    0.95    0.32 
   7  -4   0    0.80    0.36 
   7  -4   0    1.40    0.35 
   7   4   0    1.48    0.40 
   7   4   0    1.29    0.32 
   7   4   0    1.14    0.33 
   7   4   0    1.42    0.29 
   8  -4   0   13.21    1.22 
  -8  -4   0   12.77    1.18 
  -8  -4   0   12.58    1.25 
   8  -4   0   12.04    1.24 
   8  -4   0   13.38    1.17 
   8  -4   0   11.22    1.25 
   8   4   0   13.90    1.22 
   8   4   0   12.32    1.23 
  -8   4   0   13.67    1.21 
   8   4   0   12.71    1.27 
   8   4   0   13.89    1.20 
   9  -4   0    0.44    0.39 
  -9  -4   0   -0.22    0.27 
   9  -4   0    0.09    0.37 
  -9  -4   0   -0.28    0.39 
   9  -4   0    0.01    0.39 
   9  -4   0    0.85    0.27 
   9   4   0   -0.10    0.33 
  -9   4   0   -0.10    0.33 
   9   4   0    0.14    0.30 
   9   4   0   -0.07    0.36 
   9   4   0    0.47    0.43 
  10  -4   0    2.47    0.58 
 -10  -4   0    3.09    0.46 
 -10  -4   0    3.23    0.58 
  10  -4   0    2.95    0.44 
  10  -4   0    3.29    0.56 
  10   4   0    3.97    0.52 
  10   4   0    2.64    0.60 
 -10   4   0    3.52    0.55 
  10   4   0    2.03    0.53 
  10   4   0    4.45    0.50 
 -10   4   0    3.58    0.52 
 -11  -4   0   -0.69    0.33 
  11  -4   0   -0.17    0.50 
  11  -4   0    0.29    0.32 
  11  -4   0    0.10    0.46 
 -11  -4   0   -0.11    0.45 
 -11   4   0   -0.18    0.43 
 -11   4   0    0.70    0.40 
  11   4   0    0.03    0.45 
  11   4   0   -0.04    0.36 
  11   4   0    0.63    0.55 
  11   4   0   -0.43    0.40 
  12  -4   0   -0.12    0.56 
  12  -4   0    1.72    0.39 
 -12  -4   0    1.20    0.56 
  12  -4   0    1.66    0.56 
 -12  -4   0    0.64    0.40 
 -12   4   0    0.73    0.44 
  12   4   0    0.98    0.47 
  12   4   0    1.25    0.42 
 -12   4   0    1.07    0.43 
  12   4   0    1.21    0.58 
 -12   4   0    0.72    0.49 
  12   4   0    0.35    0.54 
 -13  -4   0    4.92    0.73 
  13  -4   0    4.30    0.58 
  13  -4   0    3.06    0.77 
  13  -4   0    3.35    0.72 
 -13  -4   0    3.77    0.60 
 -13   4   0    3.76    0.68 
  13   4   0    4.31    0.62 
 -13   4   0    4.78    0.64 
  13   4   0    4.20    0.66 
 -13   4   0    3.07    0.66 
  13   4   0    4.03    0.78 
 -14  -4   0    0.47    0.63 
  14  -4   0    0.46    0.66 
  14  -4   0    0.41    0.42 
  14  -4   0    0.35    0.59 
 -14   4   0   -0.56    0.55 
 -14   4   0    0.41    0.47 
  14   4   0    0.44    0.50 
  14   4   0    0.74    0.68 
  14   4   0    1.00    0.50 
 -14   4   0    0.84    0.52 
  15  -4   0    0.64    0.68 
 -15  -4   0    0.90    0.65 
  15   4   0    1.14    0.53 
  15   4   0    1.40    0.73 
  15   4   0    1.01    0.54 
 -15   4   0    0.10    0.55 
 -15   4   0    0.18    0.51 
 -16  -4   0    0.85    0.70 
  16  -4   0   -0.60    0.73 
  16   4   0    1.18    0.79 
  16   4   0    1.22    0.57 
 -16   4   0   -0.41    0.57 
 -16   4   0    0.51    0.67 
  16   4   0    0.38    0.56 
   0  -5   0   -0.14    0.18 
   0  -5   0    0.23    0.24 
   0  -5   0   -0.45    0.31 
   0   5   0   -0.02    0.35 
   0   5   0    0.14    0.26 
   0   5   0   -0.11    0.23 
   1  -5   0   79.94    6.87 
  -1  -5   0   84.94    6.88 
  -1  -5   0   81.02    6.86 
   1  -5   0   71.98    6.86 
   1  -5   0   89.92    6.87 
   1   5   0   91.09    6.88 
  -1   5   0   78.90    6.86 
   1   5   0   74.42    6.87 
  -1   5   0   84.28    6.88 
   2  -5   0   10.12    0.90 
  -2  -5   0   10.50    0.93 
  -2  -5   0   10.01    0.88 
   2  -5   0    8.51    0.92 
   2  -5   0    9.45    0.92 
   2   5   0    9.42    0.91 
  -2   5   0   10.56    0.95 
   2   5   0    9.42    0.90 
   2   5   0   10.31    0.92 
   3  -5   0    2.68    0.35 
   3  -5   0    3.06    0.42 
   3  -5   0    2.94    0.38 
  -3  -5   0    3.60    0.32 
   3  -5   0    2.15    0.39 
  -3  -5   0    2.60    0.39 
   3   5   0    2.56    0.35 
  -3   5   0    2.50    0.41 
   3   5   0    2.73    0.37 
   3   5   0    3.04    0.37 
   4  -5   0    8.19    0.77 
   4  -5   0    7.44    0.79 
  -4  -5   0    7.44    0.73 
  -4  -5   0    8.51    0.82 
   4  -5   0    9.91    0.86 
   4  -5   0    7.27    0.80 
   4   5   0    9.15    0.79 
   4   5   0    6.78    0.77 
  -4   5   0    8.81    0.82 
   4   5   0    7.91    0.84 
   4   5   0    7.46    0.80 
  -5  -5   0   20.70    1.75 
   5  -5   0   18.80    1.75 
   5  -5   0   20.33    1.74 
   5  -5   0   19.84    1.77 
   5  -5   0   18.84    1.73 
  -5  -5   0   19.14    1.70 
   5   5   0   19.26    1.72 
   5   5   0   18.13    1.73 
  -5   5   0   19.52    1.75 
   5   5   0   21.83    1.74 
   5   5   0   20.98    1.76 
   6  -5   0    3.35    0.41 
  -6  -5   0    3.40    0.45 
   6  -5   0    2.10    0.40 
   6  -5   0    2.69    0.34 
   6  -5   0    3.70    0.46 
   6  -5   0    2.44    0.44 
  -6  -5   0    2.47    0.34 
   6   5   0    2.97    0.41 
  -6   5   0    3.60    0.45 
   6   5   0    3.22    0.46 
   6   5   0    2.21    0.36 
   6   5   0    2.01    0.40 
   7  -5   0    2.81    0.48 
  -7  -5   0    3.64    0.43 
   7  -5   0    4.06    0.54 
   7  -5   0    4.46    0.44 
   7  -5   0    3.23    0.53 
  -7  -5   0    3.88    0.51 
   7  -5   0    4.39    0.49 
   7   5   0    3.65    0.45 
   7   5   0    4.61    0.49 
  -7   5   0    2.92    0.51 
   7   5   0    4.19    0.54 
   7   5   0    3.46    0.48 
   8  -5   0    1.02    0.27 
  -8  -5   0    0.93    0.28 
   8  -5   0    0.63    0.41 
   8  -5   0    0.74    0.35 
  -8  -5   0    0.71    0.39 
   8  -5   0    0.58    0.35 
  -8   5   0    0.71    0.36 
   8   5   0   -0.02    0.40 
   8   5   0    1.01    0.36 
   8   5   0    1.27    0.31 
   8   5   0    1.39    0.36 
   9  -5   0    4.74    0.53 
  -9  -5   0    4.88    0.64 
   9  -5   0    3.92    0.66 
   9  -5   0    5.05    0.62 
  -9  -5   0    4.99    0.54 
   9  -5   0    4.75    0.61 
   9   5   0    3.36    0.65 
   9   5   0    4.63    0.60 
  -9   5   0    5.15    0.64 
   9   5   0    4.58    0.56 
   9   5   0    5.43    0.62 
  -9   5   0    5.03    0.60 
  10  -5   0    5.01    0.81 
  10  -5   0    7.27    0.78 
  10  -5   0    6.62    0.79 
 -10  -5   0    6.27    0.81 
  10  -5   0    6.92    0.70 
 -10  -5   0    7.31    0.71 
  10   5   0    6.08    0.78 
 -10   5   0    7.58    0.77 
  10   5   0    7.45    0.76 
 -10   5   0    6.79    0.80 
  10   5   0    5.80    0.84 
  10   5   0    7.15    0.74 
  11  -5   0    1.04    0.50 
 -11  -5   0    0.35    0.48 
 -11  -5   0    0.25    0.34 
  11  -5   0    1.26    0.35 
  11  -5   0    1.12    0.56 
  11   5   0    0.84    0.57 
  11   5   0    0.75    0.49 
 -11   5   0    1.21    0.43 
 -11   5   0    0.74    0.49 
  11   5   0    1.69    0.41 
  11   5   0    1.21    0.44 
  12  -5   0    0.19    0.51 
 -12  -5   0   -0.80    0.36 
  12  -5   0    0.36    0.35 
 -12  -5   0    0.56    0.55 
  12  -5   0   -0.49    0.58 
  12   5   0    1.23    0.54 
 -12   5   0   -0.35    0.51 
  12   5   0    0.17    0.43 
  12   5   0    0.41    0.59 
 -12   5   0    0.77    0.44 
  12   5   0    0.64    0.41 
  13  -5   0    0.20    0.38 
  13  -5   0    0.28    0.65 
 -13  -5   0    0.86    0.56 
  13  -5   0    0.64    0.57 
  13   5   0   -0.31    0.62 
 -13   5   0    0.54    0.47 
 -13   5   0   -0.06    0.52 
  13   5   0    0.36    0.49 
  13   5   0   -0.16    0.43 
 -13   5   0   -0.21    0.48 
  14  -5   0    5.60    0.80 
 -14  -5   0    3.27    0.76 
  14  -5   0    2.97    0.57 
  14  -5   0    3.84    0.83 
 -14   5   0    4.45    0.66 
 -14   5   0    4.20    0.69 
  14   5   0    3.81    0.65 
 -14   5   0    3.52    0.75 
  14   5   0    4.77    0.69 
  14   5   0    4.16    0.87 
  15  -5   0    0.18    0.66 
 -15  -5   0    0.63    0.64 
  15   5   0    0.20    0.52 
 -15   5   0    0.65    0.56 
  15   5   0   -0.21    0.73 
 -15   5   0    0.75    0.51 
  15   5   0    0.96    0.55 
 -16  -5   0    0.49    0.68 
  16  -5   0    0.42    0.76 
  16   5   0   -0.11    0.54 
 -16   5   0    0.10    0.58 
 -16   5   0   -0.10    0.52 
  16   5   0   -0.49    0.76 
  16   5   0   -0.02    0.57 
   0  -6   0  353.95   29.83 
   0  -6   0  334.84   29.81 
   0  -6   0  366.59   29.82 
   0   6   0  384.94   29.84 
   0   6   0  343.68   29.82 
   0   6   0  353.41   29.82 
  -1  -6   0    1.08    0.33 
  -1  -6   0    1.40    0.27 
   1  -6   0    1.23    0.30 
   1  -6   0    1.42    0.30 
   1  -6   0    1.53    0.28 
   1   6   0    1.18    0.30 
  -1   6   0    1.03    0.24 
   1   6   0    0.62    0.39 
  -1   6   0    2.12    0.40 
   1   6   0    1.44    0.28 
   2  -6   0    0.48    0.24 
  -2  -6   0    0.28    0.20 
   2  -6   0    0.02    0.27 
  -2  -6   0    0.38    0.26 
   2  -6   0    0.22    0.26 
   2   6   0    0.18    0.30 
   2   6   0   -0.07    0.24 
  -2   6   0    0.23    0.33 
   2   6   0    0.00    0.26 
  -2   6   0    0.08    0.15 
   3  -6   0    0.13    0.27 
   3  -6   0   -0.07    0.22 
  -3  -6   0    0.29    0.28 
   3  -6   0    0.52    0.30 
  -3  -6   0    0.35    0.19 
   3   6   0    0.01    0.24 
  -3   6   0    0.20    0.32 
   3   6   0    0.50    0.27 
   3   6   0    0.02    0.26 
  -4  -6   0   18.53    1.69 
   4  -6   0   18.30    1.70 
  -4  -6   0   20.18    1.64 
   4  -6   0   20.23    1.68 
   4  -6   0   18.56    1.68 
   4  -6   0   19.29    1.66 
   4   6   0   19.20    1.66 
   4   6   0   18.14    1.67 
  -4   6   0   18.44    1.70 
   4   6   0   18.75    1.66 
   5  -6   0   37.07    3.32 
  -5  -6   0   38.40    3.28 
   5  -6   0   38.75    3.32 
   5  -6   0   37.40    3.30 
   5  -6   0   39.12    3.32 
  -5  -6   0   38.96    3.32 
   5   6   0   40.14    3.31 
  -5   6   0   38.92    3.32 
   5   6   0   39.54    3.33 
   5   6   0   39.28    3.31 
   5   6   0   38.51    3.30 
  -6  -6   0    4.64    0.55 
  -6  -6   0    4.56    0.45 
   6  -6   0    3.71    0.55 
   6  -6   0    3.77    0.54 
   6  -6   0    4.11    0.52 
   6  -6   0    3.56    0.49 
   6   6   0    4.17    0.50 
   6   6   0    3.84    0.54 
   6   6   0    4.12    0.51 
  -6   6   0    4.85    0.55 
   6   6   0    4.49    0.48 
   7  -6   0   -0.15    0.31 
  -7  -6   0   -0.07    0.33 
   7  -6   0   -0.12    0.37 
  -7  -6   0   -0.07    0.21 
   7  -6   0    0.48    0.37 
   7  -6   0    0.02    0.31 
   7   6   0    0.29    0.27 
   7   6   0    0.28    0.32 
  -7   6   0    0.33    0.35 
   7   6   0   -0.28    0.38 
   7   6   0   -0.30    0.31 
   8  -6   0   -0.04    0.41 
  -8  -6   0   -0.12    0.23 
   8  -6   0    0.16    0.33 
   8  -6   0    0.26    0.35 
  -8  -6   0   -0.02    0.37 
   8   6   0    0.02    0.33 
  -8   6   0   -0.26    0.37 
   8   6   0   -0.37    0.32 
   8   6   0    0.11    0.41 
   8   6   0    0.42    0.28 
   9  -6   0    3.04    0.50 
   9  -6   0    1.85    0.56 
   9  -6   0    2.98    0.41 
  -9  -6   0    2.46    0.53 
  -9  -6   0    3.04    0.40 
   9  -6   0    3.02    0.49 
   9   6   0    2.74    0.49 
  -9   6   0    3.24    0.54 
   9   6   0    3.44    0.47 
   9   6   0    3.45    0.45 
   9   6   0    1.98    0.55 
 -10  -6   0    3.21    0.44 
  10  -6   0    3.46    0.62 
  10  -6   0    3.78    0.45 
  10  -6   0    2.58    0.54 
  10  -6   0    2.77    0.55 
 -10  -6   0    3.37    0.59 
  10   6   0    2.69    0.53 
 -10   6   0    2.72    0.58 
  10   6   0    3.86    0.53 
 -10   6   0    3.27    0.53 
  10   6   0    3.27    0.49 
  10   6   0    1.96    0.60 
  11  -6   0    1.27    0.59 
  11  -6   0    1.85    0.49 
 -11  -6   0    2.03    0.39 
  11  -6   0    1.07    0.50 
  11  -6   0    2.20    0.38 
 -11  -6   0    1.76    0.55 
 -11   6   0    1.65    0.47 
  11   6   0    1.30    0.52 
 -11   6   0    1.31    0.52 
  11   6   0    1.12    0.59 
  11   6   0    1.73    0.44 
  11   6   0    1.18    0.46 
 -12  -6   0    5.14    0.64 
 -12  -6   0    5.14    0.78 
  12  -6   0    5.77    0.77 
  12  -6   0    4.54    0.83 
 -12   6   0    5.55    0.71 
 -12   6   0    4.83    0.76 
  12   6   0    5.19    0.75 
  12   6   0    5.60    0.72 
  12   6   0    5.33    0.68 
  12   6   0    4.93    0.83 
  13  -6   0    1.32    0.60 
  13  -6   0    1.21    0.67 
 -13  -6   0    0.93    0.62 
 -13   6   0    0.64    0.49 
  13   6   0    1.04    0.47 
 -13   6   0    0.02    0.47 
  13   6   0    0.52    0.65 
  13   6   0    0.62    0.50 
 -13   6   0    1.19    0.58 
  14  -6   0    1.03    0.66 
 -14  -6   0    1.83    0.67 
  14  -6   0    1.50    0.74 
  14   6   0    1.14    0.75 
  14   6   0    2.09    0.58 
  14   6   0    2.48    0.56 
 -14   6   0    2.74    0.58 
 -14   6   0    0.59    0.66 
 -14   6   0    1.84    0.56 
  15  -6   0    1.60    0.70 
 -15  -6   0    1.85    0.69 
  15   6   0    0.96    0.58 
 -15   6   0   -0.59    0.53 
 -15   6   0    1.83    0.55 
  15   6   0    0.54    0.79 
  15   6   0    1.35    0.55 
  16  -6   0    3.87    0.90 
 -16  -6   0    4.11    0.87 
  16   6   0    4.86    0.81 
 -16   6   0    5.28    0.77 
 -16   6   0    4.31    0.80 
  16   6   0    5.11    0.77 
   0  -7   0    0.59    0.29 
   0  -7   0   -0.06    0.36 
   0   7   0    0.26    0.43 
   0   7   0    0.23    0.27 
   0   7   0    0.57    0.31 
  -1  -7   0   72.34    6.03 
  -1  -7   0   74.67    6.05 
   1  -7   0   77.73    6.04 
   1  -7   0   73.65    6.04 
   1  -7   0   66.06    6.02 
   1   7   0   75.56    6.06 
   1   7   0   64.56    6.02 
  -1   7   0   70.05    6.02 
  -1   7   0   74.27    6.06 
   1   7   0   67.82    6.03 
  -2  -7   0    0.07    0.21 
   2  -7   0    0.62    0.26 
   2  -7   0   -0.10    0.27 
   2  -7   0    0.39    0.28 
  -2  -7   0    0.63    0.31 
   2   7   0    0.72    0.31 
   2   7   0    0.45    0.28 
   2   7   0   -0.18    0.26 
  -2   7   0    0.47    0.36 
  -2   7   0    0.05    0.17 
  -3  -7   0    0.21    0.20 
  -3  -7   0   -0.17    0.28 
   3  -7   0    0.03    0.22 
   3  -7   0    0.44    0.30 
   3  -7   0    0.06    0.29 
   3   7   0    0.12    0.25 
   3   7   0    0.16    0.28 
  -3   7   0    0.21    0.34 
   3   7   0    0.10    0.29 
   4  -7   0   21.82    1.89 
  -4  -7   0   21.87    1.87 
   4  -7   0   22.05    1.91 
   4  -7   0   19.58    1.91 
  -4  -7   0   22.91    1.92 
   4   7   0   20.98    1.90 
   4   7   0   21.44    1.89 
  -4   7   0   21.62    1.93 
   4   7   0   23.27    1.91 
  -5  -7   0   41.32    3.59 
   5  -7   0   41.29    3.59 
   5  -7   0   41.43    3.57 
   5  -7   0   42.95    3.59 
  -5  -7   0   43.61    3.55 
   5  -7   0   40.98    3.60 
   5   7   0   43.41    3.58 
   5   7   0   41.59    3.57 
  -5   7   0   41.93    3.60 
   5   7   0   40.59    3.56 
  -6  -7   0   18.76    1.61 
  -6  -7   0   18.90    1.68 
   6  -7   0   19.24    1.65 
   6  -7   0   18.23    1.69 
   6  -7   0   18.43    1.67 
   6  -7   0   17.88    1.68 
   6   7   0   19.33    1.64 
   6   7   0   17.28    1.69 
   6   7   0   19.03    1.66 
   6   7   0   17.61    1.65 
  -6   7   0   18.67    1.68 
  -7  -7   0    6.74    0.76 
   7  -7   0    7.02    0.80 
   7  -7   0    7.21    0.78 
   7  -7   0    6.55    0.74 
  -7  -7   0    6.99    0.70 
   7  -7   0    8.12    0.80 
  -7   7   0    7.22    0.78 
   7   7   0    7.44    0.80 
   7   7   0    6.88    0.75 
   7   7   0    6.54    0.79 
   7   7   0    7.22    0.75 
   8  -7   0    7.02    0.77 
   8  -7   0    7.55    0.84 
   8  -7   0    6.79    0.76 
  -8  -7   0    6.66    0.80 
  -8  -7   0    6.94    0.72 
   8   7   0    7.35    0.77 
   8   7   0    6.71    0.82 
  -8   7   0    7.70    0.80 
   8   7   0    6.93    0.77 
   8   7   0    7.61    0.77 
  -9  -7   0    2.20    0.49 
  -9  -7   0    1.79    0.34 
   9  -7   0    2.21    0.53 
   9  -7   0    2.02    0.45 
   9  -7   0    1.74    0.45 
   9   7   0    1.88    0.43 
   9   7   0    1.83    0.40 
  -9   7   0    1.80    0.49 
   9   7   0    1.23    0.53 
   9   7   0    1.76    0.46 
  10  -7   0   -0.13    0.52 
 -10  -7   0   -0.34    0.29 
  10  -7   0    0.20    0.42 
 -10  -7   0    0.17    0.46 
  10  -7   0   -0.22    0.42 
  10   7   0    0.23    0.43 
  10   7   0    0.05    0.54 
  10   7   0    0.46    0.41 
  10   7   0   -0.35    0.35 
 -10   7   0    0.12    0.48 
 -11  -7   0    2.04    0.41 
  11  -7   0    1.95    0.65 
  11  -7   0    2.60    0.53 
  11  -7   0    1.27    0.53 
 -11  -7   0    2.17    0.59 
 -11   7   0    1.89    0.48 
  11   7   0    2.10    0.55 
  11   7   0    1.76    0.50 
  11   7   0    1.86    0.63 
  11   7   0    2.30    0.46 
 -11   7   0    2.74    0.58 
  12  -7   0    1.02    0.63 
 -12  -7   0    0.80    0.56 
  12  -7   0    0.74    0.54 
 -12   7   0    1.71    0.58 
 -12   7   0    1.53    0.48 
  12   7   0    0.07    0.61 
  12   7   0    1.47    0.46 
  12   7   0    0.69    0.54 
  12   7   0    1.48    0.51 
 -13  -7   0    8.02    1.09 
  13  -7   0    8.93    1.16 
  13  -7   0   10.24    1.09 
  13   7   0    7.07    1.14 
 -13   7   0    8.56    1.10 
  13   7   0   10.25    1.06 
  13   7   0   10.23    1.01 
 -13   7   0   10.34    1.05 
  14  -7   0    0.86    0.64 
 -14  -7   0    3.24    0.71 
  14  -7   0    1.98    0.76 
 -14   7   0    2.75    0.57 
  14   7   0    1.36    0.57 
  14   7   0    1.20    0.54 
 -14   7   0    2.13    0.71 
 -14   7   0    0.36    0.52 
  15  -7   0    1.68    0.70 
 -15  -7   0    1.21    0.73 
 -15   7   0    2.06    0.59 
  15   7   0    1.15    0.59 
 -15   7   0    1.20    1.04 
  15   7   0    2.05    0.59 
 -15   7   0    0.36    0.55 
 -16  -7   0    0.58    0.71 
  16  -7   0    1.22    0.78 
  16   7   0    1.06    0.60 
  16   7   0    0.18    0.58 
 -16   7   0    0.46    0.57 
 -16   7   0   -0.12    0.58 
   0  -8   0   42.01    3.48 
   0  -8   0   42.09    3.50 
   0   8   0   39.68    3.48 
   0   8   0   44.62    3.53 
   0   8   0   36.59    3.46 
   1  -8   0    8.78    0.87 
   1  -8   0    9.41    0.91 
   1  -8   0    9.35    0.94 
  -1  -8   0    9.03    0.89 
  -1  -8   0    9.67    0.97 
   1   8   0    8.52    0.92 
   1   8   0    8.65    0.88 
  -1   8   0   10.21    1.02 
  -1   8   0    8.72    0.86 
   1   8   0    9.93    1.00 
   2  -8   0    5.98    0.66 
   2  -8   0    6.53    0.71 
   2  -8   0    6.51    0.70 
  -2  -8   0    6.46    0.68 
  -2  -8   0    5.48    0.67 
   2   8   0    6.78    0.70 
   2   8   0    7.48    0.71 
  -2   8   0    6.70    0.63 
  -2   8   0    5.76    0.72 
   2   8   0    7.22    0.71 
  -3  -8   0    3.15    0.47 
   3  -8   0    3.08    0.47 
  -3  -8   0    3.95    0.41 
   3  -8   0    4.45    0.49 
   3  -8   0    4.46    0.44 
  -3   8   0    3.37    0.37 
   3   8   0    3.33    0.46 
   3   8   0    4.36    0.49 
   3   8   0    2.97    0.44 
  -3   8   0    4.79    0.55 
   4  -8   0   10.35    1.01 
  -4  -8   0    9.74    1.01 
  -4  -8   0   10.28    0.94 
   4  -8   0   10.62    0.97 
   4  -8   0    9.78    1.02 
   4   8   0   10.15    1.00 
   4   8   0    8.19    0.96 
  -4   8   0   11.51    1.05 
   4   8   0   11.53    1.00 
   5  -8   0   26.42    2.32 
   5  -8   0   25.60    2.29 
   5  -8   0   26.72    2.32 
  -5  -8   0   27.99    2.27 
  -5  -8   0   25.48    2.32 
   5   8   0   25.43    2.29 
   5   8   0   25.15    2.30 
   5   8   0   27.81    2.31 
  -5   8   0   27.22    2.33 
  -6  -8   0    5.09    0.59 
  -6  -8   0    5.54    0.54 
   6  -8   0    4.56    0.59 
   6  -8   0    4.57    0.54 
   6  -8   0    4.06    0.60 
   6  -8   0    4.59    0.58 
   6   8   0    4.76    0.55 
   6   8   0    5.29    0.57 
   6   8   0    4.32    0.52 
  -6   8   0    3.67    0.59 
  -7  -8   0    1.26    0.27 
   7  -8   0    1.56    0.39 
   7  -8   0    1.42    0.36 
  -7  -8   0    1.51    0.41 
   7  -8   0    1.04    0.45 
   7   8   0    1.59    0.38 
   7   8   0    2.01    0.36 
   7   8   0    1.03    0.36 
  -7   8   0    1.69    0.45 
  -8  -8   0   -0.33    0.40 
  -8  -8   0    0.27    0.25 
   8  -8   0   -0.51    0.35 
   8  -8   0   -0.28    0.37 
   8  -8   0   -0.08    0.44 
  -8   8   0    0.31    0.42 
   8   8   0   -0.19    0.31 
   8   8   0    0.06    0.35 
   8   8   0    0.44    0.37 
  -9  -8   0    4.98    0.51 
   9  -8   0    3.47    0.59 
   9  -8   0    4.48    0.62 
   9  -8   0    3.15    0.68 
  -9  -8   0    4.25    0.65 
   9   8   0    4.80    0.60 
  -9   8   0    4.06    0.65 
   9   8   0    5.54    0.58 
   9   8   0    4.17    0.60 
   9   8   0    3.80    0.66 
 -10  -8   0    0.29    0.48 
  10  -8   0    0.75    0.45 
 -10  -8   0    0.78    0.31 
  10  -8   0    0.32    0.56 
  10  -8   0    0.53    0.44 
  10   8   0    0.81    0.55 
  10   8   0    1.09    0.43 
  10   8   0    0.49    0.37 
 -10   8   0    0.56    0.50 
  10   8   0    0.14    0.45 
 -11  -8   0    0.54    0.52 
  11  -8   0    0.57    0.50 
  11  -8   0    0.20    0.47 
  11  -8   0    0.38    0.59 
 -11  -8   0    0.13    0.32 
  11   8   0    0.53    0.45 
 -11   8   0    0.30    0.55 
  11   8   0    0.12    0.38 
 -11   8   0   -0.16    0.45 
  11   8   0    0.72    0.49 
  11   8   0   -0.14    0.58 
  12  -8   0    0.17    0.52 
 -12  -8   0    0.42    0.59 
  12  -8   0    0.21    0.66 
  12  -8   0    0.34    0.49 
  12   8   0   -0.24    0.46 
  12   8   0   -0.29    0.56 
  12   8   0   -0.09    0.42 
 -12   8   0    0.78    0.59 
 -12   8   0    0.42    0.47 
 -13  -8   0   10.09    1.15 
  13  -8   0    9.97    1.21 
  13  -8   0    9.77    1.11 
  13   8   0    8.72    1.07 
  13   8   0   10.18    1.05 
 -13   8   0    9.42    1.07 
 -13   8   0    9.50    1.16 
  14  -8   0    0.86    0.75 
  14  -8   0    1.15    0.63 
 -14  -8   0    0.78    0.69 
 -14   8   0    0.50    0.64 
 -14   8   0    0.11    0.51 
  14   8   0    0.87    0.52 
  14   8   0    1.15    0.57 
 -14   8   0    0.64    0.53 
 -15  -8   0    0.36    0.73 
  15  -8   0    0.44    0.79 
  15  -8   0    0.69    0.70 
  15   8   0    2.17    0.67 
 -15   8   0    1.25    0.72 
 -15   8   0    0.87    0.57 
  15   8   0    0.54    0.55 
 -15   8   0    0.99    0.58 
 -16  -8   0    1.63    0.79 
  16   8   0    2.22    0.65 
  16   8   0    1.83    0.71 
 -16   8   0    2.61    0.66 
   0  -9   0   -0.17    0.31 
   0  -9   0    0.02    0.37 
   0   9   0    0.21    0.45 
   0   9   0   -0.21    0.32 
   0   9   0    0.44    0.28 
   1  -9   0    4.33    0.59 
  -1  -9   0    5.04    0.55 
   1  -9   0    5.44    0.58 
  -1  -9   0    4.86    0.62 
   1   9   0    6.02    0.58 
   1   9   0    4.21    0.54 
   1   9   0    5.51    0.68 
  -1   9   0    4.67    0.67 
  -1   9   0    5.37    0.53 
   2  -9   0   54.75    4.95 
  -2  -9   0   58.83    4.94 
   2  -9   0   64.00    4.96 
   2  -9   0   56.85    4.96 
  -2   9   0   53.97    4.92 
  -2   9   0   65.83    5.00 
   2   9   0   52.79    4.95 
   2   9   0   54.44    4.95 
   2   9   0   67.21    4.99 
   3  -9   0   32.91    2.74 
  -3  -9   0   30.99    2.76 
   3  -9   0   31.53    2.75 
   3  -9   0   30.17    2.76 
  -3  -9   0   32.94    2.72 
  -3   9   0   31.18    2.70 
   3   9   0   32.43    2.75 
   3   9   0   32.59    2.75 
   3   9   0   32.23    2.76 
  -3   9   0   32.09    2.78 
   4  -9   0   27.36    2.27 
   4  -9   0   25.22    2.30 
  -4  -9   0   27.09    2.25 
  -4  -9   0   27.41    2.31 
   4  -9   0   26.27    2.30 
   4   9   0   25.19    2.27 
  -4   9   0   23.96    2.23 
   4   9   0   25.15    2.29 
   4   9   0   27.76    2.29 
  -4   9   0   28.19    2.33 
   5  -9   0    3.46    0.49 
   5  -9   0    3.82    0.53 
  -5  -9   0    3.53    0.50 
   5  -9   0    3.57    0.45 
  -5  -9   0    3.74    0.41 
  -5   9   0    3.81    0.54 
   5   9   0    3.18    0.48 
   5   9   0    3.00    0.48 
   5   9   0    3.44    0.46 
   6  -9   0    0.27    0.37 
  -6  -9   0    0.38    0.23 
   6  -9   0   -0.07    0.30 
  -6  -9   0    0.24    0.36 
   6  -9   0   -0.22    0.34 
   6   9   0   -0.16    0.33 
  -6   9   0    0.05    0.38 
   6   9   0   -0.07    0.33 
   6   9   0    0.27    0.30 
   7  -9   0   17.03    1.56 
  -7  -9   0   18.31    1.61 
   7  -9   0   15.48    1.62 
   7  -9   0   16.64    1.61 
  -7  -9   0   18.15    1.51 
   7   9   0   17.62    1.55 
   7   9   0   17.50    1.58 
  -7   9   0   15.21    1.60 
   7   9   0   17.48    1.57 
  -8  -9   0    1.72    0.30 
   8  -9   0    1.36    0.40 
   8  -9   0    1.09    0.51 
  -8  -9   0    1.53    0.47 
   8  -9   0    1.40    0.42 
  -8   9   0    1.25    0.47 
   8   9   0    1.56    0.38 
   8   9   0    1.42    0.42 
   8   9   0    1.06    0.42 
  -9  -9   0   -0.10    0.45 
   9  -9   0    0.65    0.54 
  -9  -9   0    0.94    0.30 
   9  -9   0    0.77    0.44 
   9  -9   0    0.23    0.41 
  -9   9   0    0.79    0.47 
   9   9   0    0.14    0.36 
   9   9   0    0.44    0.43 
   9   9   0    1.01    0.43 
  10  -9   0    4.00    0.64 
 -10  -9   0    3.75    0.67 
 -10  -9   0    5.16    0.53 
  10  -9   0    4.31    0.64 
  10  -9   0    3.05    0.72 
 -10   9   0    4.08    0.70 
  10   9   0    3.07    0.62 
  10   9   0    4.42    0.59 
  10   9   0    4.95    0.64 
 -11  -9   0   -0.15    0.40 
 -11  -9   0    1.15    0.55 
  11  -9   0    0.76    0.62 
  11  -9   0    0.04    0.50 
  11  -9   0   -0.01    0.47 
  11   9   0   -0.28    0.45 
  11   9   0    0.55    0.41 
  11   9   0    0.20    0.48 
 -11   9   0    0.48    0.54 
 -12  -9   0    0.97    0.63 
  12  -9   0    0.89    0.56 
  12  -9   0    0.82    0.69 
  12  -9   0    2.06    0.55 
  12   9   0    1.23    0.53 
  12   9   0    1.43    0.48 
 -12   9   0    0.34    0.50 
 -12   9   0    2.83    0.63 
  13  -9   0    5.58    0.95 
  13  -9   0    4.73    0.80 
  13  -9   0    5.40    0.81 
 -13  -9   0    4.85    0.88 
 -13   9   0    5.14    0.88 
  13   9   0    5.84    0.74 
 -13   9   0    5.90    0.78 
  13   9   0    5.48    0.78 
  14  -9   0    1.76    0.69 
 -14  -9   0    2.47    0.74 
 -14   9   0    2.60    0.75 
  14   9   0    0.58    0.60 
  14   9   0    1.67    0.56 
 -14   9   0    2.18    0.59 
  15  -9   0    0.88    0.70 
 -15  -9   0    0.66    0.72 
 -15   9   0    0.85    0.56 
 -15   9   0    1.01    0.73 
  15   9   0   -0.62    0.58 
  15   9   0    0.68    0.56 
 -15   9   0    1.70    0.58 
 -16  -9   0    1.00    0.81 
 -16   9   0    2.61    0.67 
  16   9   0    2.86    0.75 
  16   9   0    2.48    0.68 
   0 -10   0   76.77    6.21 
   0 -10   0   74.35    6.18 
   0  10   0   75.51    6.23 
   0  10   0   71.04    6.18 
   0  10   0   68.73    6.17 
  -1 -10   0  122.99   10.05 
   1 -10   0  106.24   10.03 
   1 -10   0  121.68   10.03 
  -1 -10   0  121.91   10.02 
  -1  10   0  122.76   10.01 
   1  10   0  118.96   10.05 
   1  10   0  118.71   10.01 
  -1  10   0  119.46   10.06 
   1  10   0  119.40   10.02 
  -2 -10   0    0.17    0.36 
   2 -10   0   -0.35    0.31 
   2 -10   0    0.02    0.32 
  -2 -10   0   -0.17    0.26 
   2 -10   0    0.19    0.30 
   2  10   0   -0.26    0.31 
   2  10   0    0.60    0.41 
  -2  10   0    0.23    0.40 
   2  10   0    0.11    0.31 
  -2  10   0    0.13    0.24 
   3 -10   0   20.74    1.86 
  -3 -10   0   21.15    1.87 
   3 -10   0   21.93    1.85 
  -3 -10   0   20.05    1.81 
   3 -10   0   21.02    1.84 
  -3  10   0   21.15    1.79 
   3  10   0   20.68    1.85 
   3  10   0   21.87    1.84 
  -3  10   0   19.66    1.90 
   3  10   0   20.11    1.87 
  -4 -10   0   11.32    1.00 
   4 -10   0   12.30    1.08 
  -4 -10   0    9.96    1.09 
   4 -10   0    9.81    1.03 
   4 -10   0    9.55    1.08 
   4  10   0    8.27    1.07 
   4  10   0   11.92    1.05 
  -4  10   0    9.69    1.13 
   4  10   0   11.09    1.07 
  -4  10   0   12.83    0.97 
   5 -10   0    5.06    0.56 
  -5 -10   0    4.02    0.60 
   5 -10   0    5.95    0.61 
  -5 -10   0    5.58    0.58 
   5 -10   0    4.13    0.60 
  -5  10   0    5.35    0.65 
   5  10   0    4.10    0.58 
   5  10   0    5.88    0.60 
   5  10   0    4.56    0.56 
   6 -10   0    0.34    0.32 
   6 -10   0    0.29    0.36 
  -6 -10   0    0.14    0.37 
  -6 -10   0    0.49    0.25 
   6  10   0   -0.14    0.31 
  -6  10   0   -0.88    0.39 
   6  10   0   -0.46    0.33 
   6  10   0    0.20    0.35 
   7 -10   0    0.77    0.35 
   7 -10   0    0.44    0.39 
  -7 -10   0    0.55    0.41 
  -7 -10   0    0.22    0.25 
  -7  10   0    1.28    0.46 
   7  10   0    0.27    0.35 
   7  10   0    0.33    0.38 
   7  10   0    1.38    0.39 
   8 -10   0    0.85    0.44 
  -8 -10   0    1.38    0.31 
  -8 -10   0    0.69    0.46 
   8 -10   0    1.25    0.41 
   8  10   0    1.30    0.43 
   8  10   0    1.64    0.40 
  -8  10   0    2.26    0.53 
   8  10   0    0.98    0.41 
  -9 -10   0    0.11    0.49 
   9 -10   0    0.11    0.42 
   9 -10   0    1.16    0.47 
  -9 -10   0    0.03    0.29 
  -9  10   0    0.73    0.52 
   9  10   0    0.30    0.42 
   9  10   0   -0.15    0.38 
   9  10   0    0.21    0.44 
  10 -10   0    0.11    0.56 
  10 -10   0    0.49    0.45 
 -10 -10   0    0.55    0.32 
 -10 -10   0    1.20    0.54 
  10 -10   0    0.47    0.49 
  10  10   0   -0.24    0.46 
  10  10   0    0.27    0.46 
  10  10   0    0.30    0.40 
 -10  10   0    0.72    0.54 
 -11 -10   0    0.16    0.56 
  11 -10   0    0.52    0.48 
  11 -10   0   -0.68    0.48 
  11  10   0   -0.01    0.51 
  11  10   0   -0.52    0.42 
  11  10   0    0.40    0.48 
 -11  10   0   -0.29    0.57 
 -12 -10   0    7.10    0.99 
  12 -10   0    7.04    0.94 
  12 -10   0    7.35    0.93 
 -12  10   0    7.71    0.92 
  12  10   0    7.18    0.92 
 -12  10   0    7.75    1.01 
  12  10   0    8.89    0.90 
  13 -10   0   20.23    2.01 
  13 -10   0   20.90    2.04 
 -13 -10   0   19.45    2.06 
 -13  10   0   20.25    2.11 
  13  10   0   22.16    1.99 
  13  10   0   21.40    1.96 
 -13  10   0   20.44    1.99 
  14 -10   0    1.20    0.68 
 -14 -10   0    0.78    0.76 
 -14  10   0    0.72    0.57 
  14  10   0    1.48    0.56 
 -14  10   0    1.08    0.76 
  14  10   0    2.22    0.64 
 -15 -10   0   -0.45    0.71 
 -15  10   0   -0.03    0.54 
 -15  10   0    0.56    0.76 
  15  10   0   -0.40    0.54 
  15  10   0   -0.02    0.61 
 -16 -10   0    2.51    0.84 
 -16  10   0    1.91    0.64 
  16  10   0    1.97    0.67 
  16  10   0    1.77    0.75 
   0 -11   0    0.55    0.34 
   0 -11   0    0.82    0.41 
   0  11   0   -0.03    0.34 
   0  11   0    0.29    0.30 
   0  11   0    0.08    0.49 
  -1 -11   0  101.89    8.07 
  -1 -11   0   97.19    8.04 
   1 -11   0   91.08    8.06 
   1 -11   0   95.54    8.04 
  -1  11   0   94.46    8.02 
   1  11   0   91.96    8.03 
   1  11   0   86.24    8.04 
   1  11   0   99.40    8.08 
  -1  11   0  101.65    8.09 
   2 -11   0   55.84    4.68 
   2 -11   0   54.44    4.67 
  -2 -11   0   54.24    4.69 
  -2 -11   0   56.89    4.66 
  -2  11   0   58.08    4.65 
   2  11   0   53.22    4.71 
   2  11   0   56.73    4.67 
  -2  11   0   48.72    4.70 
   2  11   0   55.32    4.67 
  -3 -11   0    6.46    0.72 
   3 -11   0    5.94    0.68 
  -3 -11   0    7.08    0.70 
   3 -11   0    6.79    0.71 
   3  11   0    5.41    0.74 
  -3  11   0    6.94    0.65 
   3  11   0    6.63    0.69 
   3  11   0    6.62    0.69 
  -3  11   0    5.94    0.77 
   4 -11   0    0.13    0.29 
   4 -11   0    0.41    0.35 
  -4 -11   0    0.73    0.36 
  -4 -11   0   -0.13    0.24 
  -4  11   0   -0.68    0.41 
   4  11   0    0.36    0.36 
  -4  11   0    0.05    0.20 
   4  11   0    0.33    0.32 
   4  11   0    0.81    0.32 
   5 -11   0   73.25    6.16 
  -5 -11   0   74.07    6.14 
   5 -11   0   71.40    6.18 
  -5 -11   0   72.66    6.19 
   5  11   0   72.25    6.17 
   5  11   0   72.15    6.18 
   5  11   0   75.15    6.18 
  -5  11   0   73.65    6.13 
  -5  11   0   70.66    6.20 
  -6 -11   0    9.16    0.85 
   6 -11   0    7.97    0.93 
  -6 -11   0    9.54    0.99 
   6 -11   0    9.19    0.98 
   6  11   0    8.06    0.91 
   6  11   0    8.83    0.96 
   6  11   0    9.00    0.92 
  -6  11   0    9.47    1.04 
   7 -11   0    2.21    0.51 
  -7 -11   0    2.81    0.38 
   7 -11   0    2.91    0.46 
  -7 -11   0    2.92    0.51 
   7  11   0    2.68    0.45 
   7  11   0    2.34    0.49 
  -7  11   0    1.87    0.55 
   7  11   0    2.90    0.50 
  -8 -11   0    0.59    0.45 
   8 -11   0    0.12    0.38 
   8 -11   0    0.91    0.45 
  -8 -11   0    0.26    0.28 
   8  11   0    0.39    0.37 
   8  11   0    0.17    0.39 
  -8  11   0    0.39    0.49 
   8  11   0    0.39    0.41 
  -9 -11   0    0.08    0.49 
  -9 -11   0    0.66    0.30 
   9 -11   0    0.05    0.41 
   9 -11   0    1.53    0.49 
  -9  11   0   -0.01    0.55 
   9  11   0    0.37    0.44 
   9  11   0    1.17    0.48 
   9  11   0    0.53    0.41 
 -10 -11   0    2.95    0.46 
 -10 -11   0    2.57    0.63 
  10 -11   0    2.53    0.58 
  10 -11   0    1.54    0.54 
  10  11   0    4.15    0.61 
  10  11   0    4.07    0.55 
  10  11   0    2.69    0.59 
 -10  11   0    2.29    0.67 
  11 -11   0    3.61    0.69 
 -11 -11   0    4.30    0.78 
  11 -11   0    5.62    0.75 
  11  11   0    4.69    0.67 
 -11  11   0    4.87    0.82 
  11  11   0    4.68    0.70 
  11  11   0    4.32    0.70 
  12 -11   0    4.65    0.74 
  12 -11   0    3.92    0.75 
 -12 -11   0    4.36    0.81 
  12  11   0    4.21    0.68 
 -12  11   0    5.63    0.87 
  12  11   0    4.98    0.74 
 -12  11   0    4.24    0.72 
 -13 -11   0   -0.53    0.65 
  13 -11   0    0.90    0.60 
  13 -11   0    0.77    0.61 
  13  11   0    1.35    0.58 
 -13  11   0   -0.60    0.53 
 -13  11   0    0.87    0.73 
  13  11   0    1.16    0.51 
 -14 -11   0    0.09    0.70 
  14 -11   0   -0.19    0.65 
 -14  11   0   -0.08    0.71 
  14  11   0    0.84    0.60 
  14  11   0    0.17    0.53 
 -14  11   0    0.84    0.57 
 -15 -11   0    2.96    0.94 
 -15  11   0    3.91    0.77 
  15  11   0    4.92    0.77 
 -15  11   0    4.42    0.97 
  15  11   0    5.00    0.82 
 -16 -11   0    0.53    0.81 
 -16  11   0    0.78    0.62 
  16  11   0   -0.21    0.60 
  16  11   0   -0.04    0.70 
   0 -12   0  101.56    8.34 
   0 -12   0  102.28    8.36 
   0  12   0   93.58    8.32 
   0  12   0  105.16    8.38 
   0  12   0   92.59    8.33 
  -1 -12   0   46.49    3.93 
   1 -12   0   38.90    3.95 
   1 -12   0   47.72    3.95 
  -1 -12   0   47.47    3.98 
  -1  12   0   43.02    3.99 
   1  12   0   50.14    3.93 
   1  12   0   43.51    4.00 
   1  12   0   47.04    3.94 
  -1  12   0   48.88    3.91 
   2 -12   0   11.24    1.18 
  -2 -12   0   13.24    1.26 
   2 -12   0   13.24    1.18 
  -2 -12   0   12.57    1.15 
   2  12   0   11.64    1.14 
   2  12   0    9.09    1.16 
   2  12   0   13.04    1.29 
  -2  12   0   13.86    1.30 
  -2  12   0   12.02    1.10 
   3 -12   0    1.09    0.36 
   3 -12   0    1.40    0.39 
  -3 -12   0    1.41    0.42 
  -3 -12   0    1.57    0.32 
  -3  12   0    1.06    0.49 
   3  12   0    0.80    0.37 
   3  12   0    1.59    0.39 
   3  12   0    0.86    0.47 
  -3  12   0    2.06    0.29 
   4 -12   0   27.65    2.28 
  -4 -12   0   24.55    2.31 
   4 -12   0   25.64    2.31 
  -4 -12   0   25.87    2.25 
   4  12   0   24.42    2.29 
   4  12   0   28.94    2.32 
   4  12   0   26.94    2.30 
  -4  12   0   24.89    2.22 
  -4  12   0   25.90    2.35 
  -5 -12   0    1.83    0.44 
  -5 -12   0    0.87    0.28 
   5 -12   0    0.26    0.38 
   5 -12   0    1.02    0.36 
   5  12   0    0.75    0.36 
   5  12   0    0.67    0.38 
  -5  12   0    0.44    0.23 
   5  12   0    1.41    0.42 
  -5  12   0    0.91    0.49 
   6 -12   0    4.97    0.62 
  -6 -12   0    3.96    0.60 
   6 -12   0    3.87    0.55 
  -6 -12   0    4.66    0.49 
   6  12   0    4.84    0.57 
  -6  12   0    5.10    0.49 
   6  12   0    4.62    0.57 
  -6  12   0    3.01    0.64 
   6  12   0    2.16    0.56 
  -7 -12   0    7.74    0.86 
  -7 -12   0    7.79    0.77 
   7 -12   0    8.04    0.80 
   7 -12   0    6.94    0.84 
  -7  12   0    7.26    0.90 
   7  12   0    6.37    0.79 
   7  12   0    6.25    0.79 
   7  12   0    8.40    0.88 
   8 -12   0    0.91    0.47 
  -8 -12   0    0.00    0.29 
  -8 -12   0    0.80    0.49 
   8 -12   0   -0.07    0.40 
   8  12   0    0.46    0.38 
   8  12   0    0.76    0.44 
   8  12   0    0.14    0.43 
  -8  12   0   -0.17    0.56 
  -9 -12   0   -0.08    0.51 
   9 -12   0    0.06    0.43 
  -9 -12   0    0.07    0.31 
   9 -12   0    0.42    0.49 
   9  12   0    0.79    0.43 
   9  12   0    1.33    0.47 
   9  12   0    0.39    0.47 
  -9  12   0    0.67    0.58 
  10 -12   0   -0.11    0.45 
 -10 -12   0    0.20    0.54 
  10 -12   0   -0.13    0.50 
  10  12   0   -0.17    0.42 
  10  12   0   -0.28    0.48 
  10  12   0    0.41    0.49 
 -10  12   0    0.70    0.60 
  11 -12   0    4.70    0.70 
  11 -12   0    3.74    0.72 
 -11 -12   0    4.02    0.78 
  11  12   0    4.55    0.70 
  11  12   0    3.67    0.70 
 -11  12   0    3.83    0.84 
  11  12   0    5.60    0.68 
 -12 -12   0    1.67    0.69 
  12 -12   0    1.60    0.63 
  12 -12   0    2.14    0.61 
  12  12   0    1.97    0.59 
 -12  12   0    0.18    0.70 
  12  12   0    1.72    0.55 
  13 -12   0    2.93    0.67 
  13 -12   0    2.40    0.70 
 -13 -12   0    2.19    0.78 
 -13  12   0    1.99    0.80 
  13  12   0    2.20    0.66 
  13  12   0    2.02    0.60 
 -13  12   0    1.95    0.65 
  14 -12   0    2.28    0.72 
 -14 -12   0    0.15    0.74 
 -14  12   0    1.10    0.64 
 -14  12   0    1.77    0.86 
  14  12   0    1.98    0.59 
  14  12   0    2.02    0.69 
 -15 -12   0    1.25    0.86 
  15  12   0    1.27    0.64 
 -15  12   0    1.71    0.88 
 -15  12   0    1.95    0.68 
  15  12   0    2.62    0.70 
   0 -13   0    0.34    0.35 
   0 -13   0    0.50    0.42 
   0  13   0    0.51    0.38 
   0  13   0    0.95    0.54 
   0  13   0    0.96    0.33 
   1 -13   0   37.02    3.49 
  -1 -13   0   45.39    3.54 
  -1 -13   0   42.61    3.47 
   1 -13   0   38.89    3.48 
  -1  13   0   40.39    3.48 
   1  13   0   40.55    3.54 
   1  13   0   39.67    3.48 
   1  13   0   39.01    3.46 
  -1  13   0   39.75    3.45 
  -1  13   0   42.29    3.55 
  -2 -13   0   16.84    1.48 
   2 -13   0   13.78    1.39 
  -2 -13   0   15.40    1.36 
   2 -13   0   14.27    1.40 
  -2  13   0   17.55    1.51 
   2  13   0   16.16    1.47 
   2  13   0   13.16    1.35 
   2  13   0   13.81    1.38 
  -2  13   0   13.67    1.32 
  -3 -13   0   -0.06    0.40 
   3 -13   0    0.58    0.36 
   3 -13   0    0.44    0.37 
  -3 -13   0   -0.21    0.28 
   3  13   0    0.06    0.34 
  -3  13   0    0.06    0.45 
  -3  13   0   -0.17    0.24 
   3  13   0   -0.07    0.35 
   3  13   0   -0.02    0.46 
   4 -13   0   14.92    1.29 
   4 -13   0   13.06    1.33 
  -4 -13   0   13.53    1.25 
  -4 -13   0   14.16    1.35 
   4  13   0   13.19    1.30 
   4  13   0   16.17    1.37 
  -4  13   0   12.38    1.21 
  -4  13   0   14.06    1.41 
   4  13   0   12.16    1.30 
   5 -13   0   85.69    6.97 
  -5 -13   0   82.89    6.94 
  -5 -13   0   81.44    6.99 
   5 -13   0   82.36    6.99 
  -5  13   0   75.80    7.01 
   5  13   0   85.15    6.98 
  -5  13   0   84.83    6.93 
   5  13   0   82.19    6.97 
   5  13   0   79.81    6.98 
   6 -13   0   39.15    3.33 
  -6 -13   0   36.85    3.33 
  -6 -13   0   39.10    3.25 
   6 -13   0   36.53    3.28 
   6  13   0   39.53    3.29 
  -6  13   0   41.00    3.23 
   6  13   0   39.57    3.31 
   6  13   0   34.58    3.31 
  -6  13   0   34.44    3.35 
  -7 -13   0    4.19    0.50 
   7 -13   0    5.14    0.66 
  -7 -13   0    4.03    0.65 
   7 -13   0    3.77    0.58 
  -7  13   0    4.05    0.46 
  -7  13   0    4.36    0.73 
   7  13   0    4.01    0.58 
   7  13   0    4.16    0.62 
   7  13   0    4.63    0.65 
  -8 -13   0   -0.57    0.47 
  -8 -13   0    0.57    0.32 
   8 -13   0    0.31    0.46 
   8 -13   0   -0.59    0.39 
   8  13   0    0.84    0.43 
  -8  13   0    0.08    0.56 
   8  13   0   -0.41    0.44 
   8  13   0   -0.16    0.45 
   9 -13   0    0.39    0.50 
   9 -13   0   -0.04    0.45 
  -9 -13   0    0.46    0.54 
  -9 -13   0    0.69    0.33 
   9  13   0    1.10    0.50 
   9  13   0    1.18    0.48 
  -9  13   0    0.02    0.59 
   9  13   0    0.30    0.43 
 -10 -13   0    1.56    0.64 
  10 -13   0    3.73    0.60 
  10 -13   0    2.88    0.63 
  10  13   0    3.24    0.61 
  10  13   0    2.72    0.62 
  10  13   0    3.31    0.58 
 -10  13   0    2.05    0.73 
 -11 -13   0    4.74    0.83 
  11 -13   0    4.76    0.74 
  11 -13   0    6.44    0.82 
  11  13   0    5.11    0.72 
 -11  13   0    4.94    0.92 
  11  13   0    5.12    0.76 
  11  13   0    4.86    0.79 
  12 -13   0    2.40    0.73 
  12 -13   0    3.54    0.67 
 -12 -13   0    2.90    0.75 
  12  13   0    3.06    0.60 
  12  13   0    2.78    0.67 
 -12  13   0    2.27    0.81 
  13 -13   0    5.27    0.81 
  13 -13   0    4.60    0.84 
 -13 -13   0    4.40    0.89 
  13  13   0    4.39    0.73 
 -13  13   0    4.48    0.79 
  13  13   0    4.39    0.77 
 -13  13   0    3.16    0.96 
 -14 -13   0    0.91    0.81 
  14 -13   0    0.86    0.70 
  14  13   0    0.73    0.65 
 -14  13   0    1.12    0.63 
 -14  13   0    1.51    0.82 
  14  13   0   -0.24    0.57 
 -15 -13   0    0.07    0.79 
 -15  13   0    0.48    0.64 
  15  13   0    0.34    0.59 
  15  13   0   -0.04    0.65 
 -15  13   0    0.36    0.88 
   0 -14   0    5.74    0.67 
   0 -14   0    6.32    0.74 
   0  14   0    7.17    0.83 
   0  14   0    5.55    0.69 
   0  14   0    5.46    0.64 
   1 -14   0    2.98    0.54 
  -1 -14   0    3.58    0.48 
  -1 -14   0    2.52    0.57 
   1 -14   0    2.54    0.47 
   1  14   0    3.10    0.45 
  -1  14   0    2.98    0.43 
  -1  14   0    3.71    0.64 
  -1  14   0    3.02    0.48 
   1  14   0    2.78    0.64 
   1  14   0    2.98    0.50 
  -2 -14   0   20.14    1.76 
   2 -14   0   14.76    1.67 
  -2 -14   0   18.40    1.66 
   2 -14   0   18.53    1.70 
  -2  14   0   21.08    1.80 
   2  14   0   17.96    1.76 
   2  14   0   19.43    1.68 
   2  14   0   18.78    1.68 
  -2  14   0   17.78    1.62 
  -3 -14   0   10.51    1.05 
  -3 -14   0   10.58    1.17 
   3 -14   0   10.48    1.11 
   3 -14   0   10.55    1.11 
  -3  14   0   11.07    1.16 
  -3  14   0   11.08    1.01 
   3  14   0   10.70    1.07 
   3  14   0   10.23    1.09 
   3  14   0   10.67    1.13 
   4 -14   0    4.82    0.58 
   4 -14   0    3.99    0.61 
  -4 -14   0    5.14    0.67 
  -4 -14   0    4.13    0.52 
   4  14   0    4.15    0.59 
  -4  14   0    4.35    0.49 
  -4  14   0    4.01    0.71 
   4  14   0    5.26    0.67 
   4  14   0    3.71    0.58 
   5 -14   0   -0.14    0.41 
  -5 -14   0   -0.16    0.44 
   5 -14   0   -0.24    0.37 
  -5 -14   0   -0.05    0.28 
   5  14   0    0.38    0.38 
  -5  14   0    0.02    0.24 
   5  14   0    0.90    0.47 
   5  14   0    0.02    0.39 
  -5  14   0    0.14    0.53 
  -6 -14   0    0.47    0.30 
  -6 -14   0    0.11    0.46 
   6 -14   0    1.06    0.45 
   6 -14   0    0.56    0.39 
   6  14   0    0.23    0.38 
  -6  14   0   -0.17    0.24 
  -6  14   0    0.50    0.54 
   6  14   0    0.92    0.40 
   6  14   0    0.00    0.44 
   7 -14   0   18.27    1.76 
  -7 -14   0   19.22    1.71 
  -7 -14   0   19.58    1.84 
   7 -14   0   19.18    1.83 
   7  14   0   16.75    1.79 
  -7  14   0   21.73    1.68 
   7  14   0   17.90    1.77 
  -7  14   0   17.32    1.87 
   7  14   0   20.72    1.80 
  -8 -14   0   -0.15    0.31 
   8 -14   0    0.32    0.49 
  -8 -14   0   -0.08    0.51 
   8 -14   0    0.46    0.43 
   8  14   0   -0.23    0.47 
  -8  14   0   -0.97    0.58 
   8  14   0   -1.07    0.42 
   8  14   0   -0.52    0.45 
  -8  14   0   -0.10    0.26 
   9 -14   0    0.95    0.47 
   9 -14   0    1.37    0.57 
  -9 -14   0   -0.04    0.56 
   9  14   0   -0.46    0.48 
   9  14   0    0.18    0.49 
  -9  14   0    0.72    0.65 
   9  14   0    0.49    0.47 
 -10 -14   0    1.75    0.62 
  10 -14   0    0.46    0.52 
  10 -14   0    0.90    0.58 
  10  14   0    1.75    0.56 
  10  14   0    1.71    0.57 
  10  14   0    1.42    0.51 
 -10  14   0    1.48    0.71 
  11 -14   0    2.48    0.70 
 -11 -14   0    2.33    0.72 
  11 -14   0    2.66    0.66 
 -11  14   0    3.81    0.87 
  11  14   0    2.86    0.66 
  11  14   0    3.61    0.63 
  12 -14   0    0.33    0.58 
  12 -14   0    0.41    0.64 
 -12 -14   0    0.45    0.68 
 -12  14   0    0.34    0.80 
  12  14   0    1.27    0.61 
  12  14   0   -0.04    0.54 
  13 -14   0    0.60    0.66 
 -13 -14   0    1.42    0.81 
 -13  14   0    0.83    0.62 
  13  14   0    0.41    0.57 
  13  14   0    0.90    0.63 
 -13  14   0    1.34    0.87 
  14 -14   0   -0.35    0.67 
 -14 -14   0   -1.14    0.77 
  14  14   0    0.71    0.58 
  14  14   0    0.26    0.63 
 -14  14   0    0.72    0.89 
 -14  14   0   -0.34    0.60 
 -15 -14   0    0.17    0.84 
 -15  14   0    0.95    0.92 
  15  14   0   -0.26    0.61 
  15  14   0    1.65    0.72 
 -15  14   0    0.20    0.64 
   0 -15   0   -0.14    0.42 
   0 -15   0    0.30    0.35 
   0  15   0   -0.70    0.36 
   0  15   0    0.56    0.56 
   0  15   0   -0.50    0.32 
  -1 -15   0    1.88    0.44 
  -1 -15   0    1.55    0.53 
   1 -15   0    2.92    0.48 
   1 -15   0    1.54    0.52 
  -1  15   0    3.27    0.42 
   1  15   0    2.07    0.63 
  -1  15   0    2.55    0.45 
   1  15   0    2.12    0.48 
  -1  15   0    2.47    0.63 
   1  15   0    3.17    0.46 
   2 -15   0    0.31    0.42 
  -2 -15   0    0.95    0.36 
  -2 -15   0    0.47    0.48 
   2 -15   0    0.94    0.40 
  -2  15   0    0.93    0.55 
   2  15   0    0.20    0.53 
  -2  15   0    1.24    0.32 
   2  15   0    0.67    0.42 
   2  15   0    0.86    0.37 
  -3 -15   0   24.72    2.33 
   3 -15   0   24.69    2.29 
   3 -15   0   25.15    2.29 
  -3 -15   0   26.86    2.26 
  -3  15   0   26.57    2.37 
   3  15   0   25.60    2.27 
   3  15   0   23.94    2.36 
  -3  15   0   26.66    2.22 
   3  15   0   25.40    2.28 
   4 -15   0   22.91    1.93 
  -4 -15   0   19.74    1.98 
  -4 -15   0   22.33    1.89 
   4 -15   0   20.11    1.94 
  -4  15   0   21.19    1.85 
   4  15   0   20.71    1.92 
   4  15   0   21.14    1.92 
  -4  15   0   21.02    2.02 
   4  15   0   20.44    1.99 
   5 -15   0    0.27    0.44 
  -5 -15   0    0.19    0.30 
   5 -15   0    0.46    0.40 
  -5 -15   0    0.31    0.48 
   5  15   0    0.07    0.41 
  -5  15   0    0.29    0.56 
   5  15   0   -0.01    0.46 
  -5  15   0   -0.48    0.26 
   5  15   0    0.84    0.43 
  -6 -15   0    1.35    0.35 
   6 -15   0    1.10    0.44 
  -6 -15   0    1.41    0.54 
   6 -15   0    1.19    0.50 
  -6  15   0    1.84    0.30 
   6  15   0    0.40    0.50 
   6  15   0    1.45    0.45 
  -6  15   0    0.09    0.57 
   6  15   0    1.68    0.48 
  -7 -15   0   17.07    1.50 
   7 -15   0   15.51    1.63 
  -7 -15   0   15.46    1.64 
   7 -15   0   17.59    1.57 
  -7  15   0   18.26    1.47 
   7  15   0   15.48    1.56 
   7  15   0   16.33    1.61 
  -7  15   0   16.03    1.70 
   7  15   0   14.03    1.57 
  -8 -15   0    1.24    0.59 
   8 -15   0    2.25    0.52 
  -8 -15   0    1.45    0.37 
   8 -15   0    1.65    0.58 
  -8  15   0    1.04    0.66 
   8  15   0    1.11    0.50 
   8  15   0    0.78    0.52 
   8  15   0    2.02    0.56 
   9 -15   0    1.48    0.52 
  -9 -15   0    1.13    0.61 
   9 -15   0    0.83    0.58 
  -9  15   0    1.80    0.73 
   9  15   0    2.65    0.55 
   9  15   0    1.97    0.59 
   9  15   0    1.13    0.56 
 -10 -15   0   -0.26    0.64 
  10 -15   0    0.25    0.51 
  10 -15   0    1.86    0.63 
  10  15   0    1.15    0.52 
  10  15   0    0.45    0.56 
  10  15   0    1.49    0.56 
 -10  15   0    0.09    0.70 
  11 -15   0    0.08    0.57 
  11 -15   0    0.17    0.62 
 -11 -15   0    0.80    0.69 
 -11  15   0   -0.04    0.73 
  11  15   0    0.97    0.60 
  11  15   0    1.11    0.55 
 -12 -15   0    1.63    0.74 
  12 -15   0    0.73    0.60 
  12 -15   0    0.27    0.63 
  12  15   0    1.14    0.57 
 -12  15   0    0.17    0.78 
  12  15   0    1.32    0.64 
  13 -15   0    2.78    0.80 
 -13 -15   0    2.93    0.85 
  13  15   0    3.46    0.70 
 -13  15   0    3.13    0.97 
  13  15   0    3.83    0.77 
  14 -15   0    3.32    0.82 
 -14 -15   0    1.14    0.85 
  14  15   0    2.06    0.78 
 -14  15   0    2.39    0.99 
  14  15   0    3.76    0.71 
 -14  15   0    2.01    0.71 
 -15 -15   0    0.72    0.89 
  15 -15   0    3.15    0.83 
 -15  15   0    0.54    0.69 
  15  15   0    3.02    0.74 
 -15  15   0    2.57    1.02 
  15  15   0    1.32    0.73 
   0 -16   0    2.92    0.55 
   0 -16   0    2.15    0.44 
   0  16   0    1.68    0.38 
   0  16   0    1.93    0.61 
   0  16   0    0.78    0.44 
   1 -16   0    2.80    0.52 
  -1 -16   0    3.31    0.51 
  -1 -16   0    3.78    0.63 
   1 -16   0    4.20    0.62 
   1  16   0    3.06    0.71 
   1  16   0    2.97    0.49 
  -1  16   0    3.99    0.70 
  -1  16   0    3.28    0.46 
   1  16   0    3.33    0.55 
  -1  16   0    3.32    0.53 
   2 -16   0    2.48    0.49 
  -2 -16   0    2.71    0.45 
  -2 -16   0    2.31    0.58 
   2 -16   0    1.78    0.52 
  -2  16   0    2.05    0.64 
   2  16   0    2.14    0.48 
   2  16   0    2.81    0.46 
  -2  16   0    2.35    0.45 
  -2  16   0    2.45    0.40 
   2  16   0    1.54    0.62 
   3 -16   0    1.23    0.48 
   3 -16   0    2.44    0.47 
  -3 -16   0    1.59    0.55 
  -3 -16   0    1.31    0.39 
   3  16   0    0.50    0.56 
  -3  16   0    1.16    0.34 
   3  16   0    1.19    0.43 
  -3  16   0    1.85    0.62 
   3  16   0    1.41    0.45 
  -4 -16   0    2.23    0.42 
   4 -16   0    1.72    0.51 
   4 -16   0    1.18    0.47 
  -4 -16   0    2.12    0.57 
   4  16   0    1.34    0.60 
  -4  16   0    1.99    0.65 
  -4  16   0    2.24    0.37 
   4  16   0    2.31    0.52 
   4  16   0    2.45    0.49 
   5 -16   0    0.57    0.43 
  -5 -16   0   -0.04    0.53 
  -5 -16   0    0.19    0.33 
   5 -16   0   -0.62    0.45 
   5  16   0   -0.26    0.41 
   5  16   0   -0.06    0.49 
  -5  16   0    0.45    0.29 
   5  16   0   -0.09    0.42 
  -5  16   0    0.10    0.58 
   6 -16   0    5.17    0.73 
  -6 -16   0    3.73    0.73 
  -6 -16   0    4.36    0.59 
   6 -16   0    5.10    0.68 
   6  16   0    5.56    0.71 
  -6  16   0    4.80    0.83 
   6  16   0    4.39    0.74 
  -6  16   0    6.27    0.56 
   6  16   0    4.38    0.68 
  -7 -16   0    1.95    0.39 
   7 -16   0    1.89    0.56 
   7 -16   0    1.35    0.50 
  -7 -16   0    0.35    0.55 
   7  16   0    1.41    0.54 
   7  16   0    1.45    0.51 
  -7  16   0    2.19    0.36 
  -7  16   0    0.61    0.68 
   7  16   0    0.79    0.55 
  -8 -16   0    8.38    1.06 
   8 -16   0    7.57    0.96 
   8 -16   0    9.55    1.06 
   8  16   0    9.51    1.02 
  -8  16   0    7.32    1.09 
   8  16   0    9.73    1.04 
   8  16   0    9.68    1.00 
   9 -16   0    0.14    0.59 
   9 -16   0    1.58    0.55 
  -9 -16   0    0.78    0.61 
   9  16   0    1.64    0.58 
  -9  16   0    0.48    0.70 
   9  16   0    1.63    0.60 
   9  16   0    2.16    0.55 
  10 -16   0    1.86    0.57 
 -10 -16   0    0.87    0.67 
  10 -16   0    1.20    0.66 
  10  16   0    1.37    0.55 
 -10  16   0    0.37    0.79 
  10  16   0    1.76    0.62 
  10  16   0    1.40    0.61 
  11 -16   0    2.20    0.63 
  11 -16   0    0.77    0.67 
 -11 -16   0    1.09    0.71 
  11  16   0    1.97    0.60 
  11  16   0    0.15    0.59 
 -11  16   0    0.25    0.81 
 -12 -16   0    0.39    0.76 
  12 -16   0    1.27    0.70 
  12  16   0    1.21    0.60 
  12  16   0    1.44    0.67 
 -12  16   0    1.45    0.91 
  13 -16   0    0.99    0.71 
 -13 -16   0    0.12    0.77 
  13  16   0    0.26    0.66 
  13  16   0    0.79    0.60 
 -13  16   0   -0.99    0.84 
 -14 -16   0   -0.57    0.87 
  14 -16   0    1.67    0.79 
 -14  16   0    1.34    0.93 
  14  16   0    0.68    0.63 
 -14  16   0    0.98    0.71 
  14  16   0    2.20    0.79 
   0 -17   0   -0.49    0.37 
   0 -17   0    0.09    0.48 
   0  17   0   -0.04    0.40 
   0  17   0   -0.49    0.35 
   0  17   0    0.58    0.62 
   1 -17   0    1.91    0.56 
  -1 -17   0    3.07    0.61 
   1 -17   0    2.92    0.52 
  -1 -17   0    2.91    0.49 
  -1  17   0    2.62    0.44 
  -1  17   0    3.10    0.50 
   1  17   0    2.37    0.51 
  -1  17   0    2.97    0.69 
   1  17   0    2.69    0.70 
   1  17   0    2.41    0.47 
  -2 -17   0    4.15    0.54 
   2 -17   0    3.12    0.55 
   2 -17   0    2.14    0.57 
  -2 -17   0    4.04    0.66 
  -2  17   0    3.92    0.48 
  -2  17   0    3.03    0.71 
  -2  17   0    3.70    0.55 
   2  17   0    2.73    0.72 
   2  17   0    3.21    0.58 
   2  17   0    3.13    0.52 
  -3 -17   0    2.61    0.63 
  -3 -17   0    2.20    0.45 
   3 -17   0    1.58    0.53 
   3 -17   0    2.00    0.51 
  -3  17   0    2.66    0.40 
   3  17   0    2.50    0.53 
   3  17   0    2.72    0.49 
  -3  17   0    1.29    0.65 
   3  17   0    1.40    0.63 
  -4 -17   0    1.26    0.40 
   4 -17   0    0.72    0.48 
   4 -17   0    0.97    0.49 
  -4 -17   0    2.15    0.60 
   4  17   0    1.00    0.62 
  -4  17   0    1.80    0.35 
   4  17   0    1.59    0.47 
   4  17   0    1.34    0.49 
  -4  17   0    0.77    0.63 
   5 -17   0   25.70    2.28 
  -5 -17   0   23.49    2.34 
  -5 -17   0   26.04    2.23 
   5 -17   0   25.78    2.33 
  -5  17   0   25.52    2.19 
   5  17   0   24.87    2.28 
  -5  17   0   23.01    2.39 
   5  17   0   25.22    2.27 
   5  17   0   25.76    2.36 
   6 -17   0    1.10    0.50 
  -6 -17   0    0.84    0.37 
   6 -17   0   -0.15    0.52 
  -6 -17   0    0.58    0.56 
  -6  17   0    0.88    0.66 
   6  17   0    0.41    0.58 
   6  17   0    1.12    0.50 
  -6  17   0    0.86    0.31 
   6  17   0    0.35    0.49 
   7 -17   0    0.57    0.50 
   7 -17   0    0.99    0.55 
  -7 -17   0    0.80    0.58 
  -7 -17   0    1.17    0.38 
  -7  17   0    1.06    0.69 
   7  17   0    0.71    0.57 
   7  17   0    1.09    0.52 
   7  17   0    0.99    0.49 
  -8 -17   0    1.12    0.64 
   8 -17   0    1.23    0.53 
   8 -17   0    0.73    0.58 
   8  17   0    1.45    0.56 
   8  17   0    2.03    0.64 
  -8  17   0    0.14    0.71 
   8  17   0    0.68    0.54 
   9 -17   0    1.22    0.55 
   9 -17   0    0.42    0.61 
  -9 -17   0    0.84    0.65 
  -9  17   0    1.05    0.76 
   9  17   0    1.73    0.59 
   9  17   0    1.14    0.63 
   9  17   0    1.37    0.56 
 -10 -17   0    1.25    0.71 
  10 -17   0   -0.14    0.65 
  10 -17   0    0.75    0.57 
  10  17   0    0.02    0.58 
  10  17   0   -0.22    0.61 
  10  17   0    0.66    0.59 
 -10  17   0    1.16    0.79 
  11 -17   0    2.76    0.80 
 -11 -17   0    3.07    0.81 
  11 -17   0    3.97    0.72 
 -11  17   0    3.38    0.93 
  11  17   0    3.75    0.72 
  11  17   0    2.94    0.74 
  12 -17   0    1.35    0.74 
 -12 -17   0   -0.07    0.75 
 -12  17   0    0.45    0.85 
  12  17   0   -0.38    0.59 
  12  17   0   -0.87    0.65 
 -13 -17   0   -0.13    0.85 
  13 -17   0    0.23    0.77 
  13  17   0    0.96    0.66 
  13  17   0   -0.26    0.67 
 -13  17   0    1.02    0.97 
 -14 -17   0    2.14    0.93 
  14 -17   0    2.70    0.90 
  14  17   0    4.87    0.78 
 -14  17   0    1.65    1.05 
  14  17   0    2.59    0.80 
 -14  17   0    2.49    0.81 
   0 -18   0   49.47    4.32 
   0 -18   0   55.64    4.38 
   0  18   0   50.93    4.41 
   0  18   0   47.07    4.29 
   0  18   0   49.47    4.32 
  -1 -18   0    5.02    0.64 
   1 -18   0    3.76    0.64 
  -1 -18   0    5.37    0.75 
   1 -18   0    5.34    0.73 
   1  18   0    4.68    0.66 
  -1  18   0    5.01    0.66 
   1  18   0    4.84    0.62 
  -1  18   0    4.88    0.59 
   1  18   0    3.93    0.83 
  -1  18   0    5.07    0.83 
   2 -18   0    0.50    0.44 
   2 -18   0   -0.31    0.49 
  -2 -18   0    0.22    0.56 
  -2 -18   0   -0.18    0.39 
   2  18   0    0.18    0.41 
   2  18   0    0.05    0.61 
  -2  18   0    2.15    0.67 
  -2  18   0    0.58    0.34 
   2  18   0   -0.03    0.44 
  -2  18   0    0.63    0.43 
   3 -18   0   -0.49    0.48 
   3 -18   0    0.20    0.46 
  -3 -18   0    0.72    0.40 
  -3 -18   0    0.99    0.59 
  -3  18   0    1.23    0.33 
  -3  18   0    0.26    0.64 
   3  18   0    0.93    0.47 
   3  18   0    0.85    0.43 
   3  18   0   -0.05    0.61 
  -4 -18   0    5.27    0.80 
   4 -18   0    5.34    0.74 
   4 -18   0    6.39    0.76 
  -4 -18   0    6.28    0.67 
   4  18   0    4.32    0.83 
  -4  18   0    5.04    0.59 
  -4  18   0    4.65    0.86 
   4  18   0    4.17    0.72 
   4  18   0    4.66    0.69 
  -5 -18   0    6.63    0.99 
  -5 -18   0    9.13    0.94 
   5 -18   0    6.90    0.95 
   5 -18   0    8.10    0.94 
  -5  18   0    8.24    0.87 
   5  18   0    8.35    0.94 
  -5  18   0    7.82    1.08 
   5  18   0    8.82    0.93 
   5  18   0    8.68    1.03 
  -6 -18   0   16.45    1.81 
  -6 -18   0   19.25    1.67 
   6 -18   0   19.39    1.75 
   6 -18   0   17.29    1.77 
   6  18   0   17.80    1.74 
   6  18   0   16.63    1.72 
   6  18   0   18.98    1.82 
  -6  18   0   16.48    1.89 
   7 -18   0    6.17    0.79 
  -7 -18   0    6.83    0.73 
  -7 -18   0    5.43    0.85 
   7 -18   0    5.49    0.82 
  -7  18   0    4.42    0.93 
   7  18   0    5.27    0.84 
   7  18   0    4.19    0.76 
   7  18   0    5.02    0.76 
   8 -18   0    0.39    0.56 
  -8 -18   0    0.55    0.62 
   8 -18   0    0.36    0.59 
   8  18   0    0.82    0.55 
   8  18   0    0.75    0.63 
   8  18   0    0.49    0.58 
  -8  18   0    0.08    0.74 
   9 -18   0    1.56    0.58 
   9 -18   0   -0.58    0.65 
  -9 -18   0    1.08    0.69 
   9  18   0    1.55    0.64 
   9  18   0    1.19    0.62 
   9  18   0    1.56    0.58 
  -9  18   0    1.15    0.80 
  10 -18   0   -1.17    0.65 
  10 -18   0    0.03    0.57 
 -10 -18   0    0.13    0.69 
 -10  18   0   -0.59    0.84 
  10  18   0   -1.00    0.59 
  10  18   0    0.13    0.56 
  10  18   0    0.47    0.62 
 -11 -18   0    9.76    1.21 
  11 -18   0    9.49    1.19 
 -11  18   0    8.47    1.33 
  11  18   0    9.20    1.15 
  11  18   0    8.76    1.10 
 -12 -18   0    0.47    0.80 
  12 -18   0    0.52    0.76 
  12  18   0    1.32    0.64 
 -12  18   0   -0.15    0.94 
  12  18   0   -0.69    0.65 
  13 -18   0   -0.02    0.79 
 -13 -18   0   -1.56    0.81 
 -13  18   0    1.43    1.02 
  13  18   0    0.73    0.66 
  13  18   0   -0.41    0.68 
 -14 -18   0   -0.64    0.86 
  14 -18   0    0.71    0.85 
  14  18   0    0.55    0.77 
 -14  18   0    0.05    0.68 
  14  18   0   -0.24    0.69 
 -14  18   0   -0.55    1.03 
   0 -19   0    0.44    0.44 
   0 -19   0    0.53    0.56 
   0  19   0    0.19    0.45 
   0  19   0    0.02    0.38 
   0  19   0    1.05    0.67 
   1 -19   0    0.05    0.53 
   1 -19   0    0.19    0.43 
  -1 -19   0    0.33    0.41 
  -1 -19   0   -0.14    0.52 
   1  19   0    0.13    0.66 
  -1  19   0    0.41    0.67 
  -1  19   0    0.33    0.43 
   1  19   0   -0.01    0.37 
  -1  19   0   -0.01    0.35 
   1  19   0    0.26    0.47 
  -2 -19   0    1.13    0.62 
   2 -19   0    1.15    0.49 
   2 -19   0    1.15    0.53 
  -2 -19   0    2.09    0.47 
   2  19   0    1.07    0.46 
   2  19   0    1.43    0.70 
   2  19   0    2.11    0.53 
  -2  19   0    1.64    0.48 
  -2  19   0    2.17    0.40 
  -2  19   0    2.12    0.69 
  -3 -19   0    8.53    0.96 
   3 -19   0    4.10    0.85 
   3 -19   0    8.98    0.89 
  -3 -19   0    6.65    0.80 
  -3  19   0    7.06    0.75 
  -3  19   0    6.61    1.00 
   3  19   0    6.36    0.99 
  -3  19   0    8.47    0.83 
   3  19   0    7.50    0.82 
   3  19   0    7.52    0.86 
   4 -19   0    3.87    0.62 
  -4 -19   0    2.84    0.68 
  -4 -19   0    1.60    0.47 
   4 -19   0    1.75    0.59 
   4  19   0    1.50    0.52 
   4  19   0    1.76    0.55 
  -4  19   0    1.99    0.41 
   4  19   0    3.26    0.76 
  -4  19   0    2.70    0.74 
   5 -19   0   41.15    3.57 
   5 -19   0   41.12    3.59 
  -5 -19   0   42.79    3.53 
  -5 -19   0   41.46    3.65 
   5  19   0   38.73    3.64 
  -5  19   0   40.73    3.48 
   5  19   0   41.45    3.56 
   5  19   0   39.50    3.56 
  -5  19   0   37.80    3.66 
  -6 -19   0    5.57    0.83 
  -6 -19   0    4.36    0.60 
   6 -19   0    4.35    0.73 
   6 -19   0    3.23    0.72 
   6  19   0    5.33    0.84 
   6  19   0    4.42    0.71 
   6  19   0    3.32    0.69 
  -6  19   0    3.85    0.90 
  -7 -19   0    1.59    0.68 
   7 -19   0    1.69    0.60 
   7 -19   0    1.17    0.65 
   7  19   0    1.11    0.67 
  -7  19   0    1.94    0.80 
   7  19   0    1.64    0.60 
   7  19   0    2.50    0.61 
  -8 -19   0   -0.04    0.68 
   8 -19   0    1.40    0.65 
   8 -19   0    0.88    0.56 
  -8  19   0    1.07    0.80 
   8  19   0    0.67    0.66 
   8  19   0    1.04    0.61 
   8  19   0    0.43    0.59 
   9 -19   0    2.10    0.66 
   9 -19   0    2.53    0.74 
  -9 -19   0    1.14    0.75 
   9  19   0    2.85    0.66 
   9  19   0    1.62    0.66 
   9  19   0    0.97    0.71 
  -9  19   0    3.52    0.91 
  10 -19   0   -0.65    0.63 
  10 -19   0   -0.19    0.69 
 -10 -19   0    0.10    0.71 
 -10  19   0    0.36    0.85 
  10  19   0   -0.94    0.62 
  10  19   0   -0.16    0.58 
 -11 -19   0    6.46    1.19 
  11 -19   0   11.27    1.25 
  11  19   0    8.60    1.13 
  11  19   0   10.45    1.14 
 -11  19   0    9.37    1.35 
  12 -19   0    0.53    0.78 
 -12 -19   0   -0.92    0.79 
  12  19   0   -0.26    0.69 
  12  19   0   -0.20    0.64 
 -12  19   0   -0.69    0.98 
  13 -19   0    1.56    0.85 
 -13 -19   0    0.81    0.91 
  13  19   0    1.84    0.76 
  13  19   0    1.24    0.72 
 -13  19   0    0.32    1.03 
   0 -20   0   34.93    2.95 
   0 -20   0   31.45    2.87 
   0  20   0   32.57    2.87 
   0  20   0   33.09    2.84 
   0  20   0   29.82    2.99 
   1 -20   0    0.34    0.57 
  -1 -20   0    1.38    0.47 
  -1 -20   0    0.90    0.61 
   1 -20   0    0.94    0.50 
  -1  20   0    0.76    0.68 
  -1  20   0    1.35    0.41 
   1  20   0    0.79    0.71 
   1  20   0    1.13    0.50 
  -1  20   0    1.56    0.49 
   1  20   0    1.16    0.42 
  -2 -20   0    0.05    0.60 
  -2 -20   0   -0.02    0.42 
   2 -20   0    0.09    0.47 
   2 -20   0   -0.24    0.53 
  -2  20   0   -0.19    0.67 
   2  20   0    0.13    0.49 
   2  20   0   -0.73    0.40 
   2  20   0    0.32    0.68 
  -2  20   0    0.32    0.36 
  -2  20   0   -0.03    0.43 
  -3 -20   0    0.06    0.42 
   3 -20   0   -0.52    0.48 
   3 -20   0   -1.40    0.53 
  -3 -20   0    0.56    0.63 
   3  20   0    0.16    0.44 
  -3  20   0   -0.05    0.66 
  -3  20   0    0.57    0.36 
   3  20   0    0.43    0.49 
   3  20   0   -0.52    0.71 
  -3  20   0    0.64    0.46 
  -4 -20   0    1.75    0.68 
   4 -20   0    0.09    0.56 
  -4 -20   0    2.41    0.49 
   4 -20   0    0.96    0.57 
   4  20   0    1.79    0.55 
  -4  20   0    1.32    0.39 
   4  20   0    2.08    0.58 
  -4  20   0    1.44    0.74 
   4  20   0    1.45    0.75 
  -5 -20   0   14.93    1.70 
  -5 -20   0   17.89    1.59 
   5 -20   0   16.28    1.67 
   5 -20   0   16.83    1.70 
   5  20   0   15.66    1.81 
   5  20   0   17.79    1.65 
   5  20   0   15.03    1.65 
  -5  20   0   18.07    1.85 
   6 -20   0   14.22    1.43 
  -6 -20   0   14.78    1.37 
   6 -20   0   12.23    1.42 
  -6 -20   0   13.89    1.50 
   6  20   0   14.65    1.47 
   6  20   0   14.01    1.46 
  -6  20   0   11.93    1.52 
   6  20   0   13.76    1.49 
   7 -20   0   -0.22    0.62 
   7 -20   0   -0.39    0.55 
  -7 -20   0   -0.35    0.68 
  -7  20   0   -1.07    0.76 
   7  20   0   -0.44    0.58 
   7  20   0   -0.01    0.65 
   7  20   0   -0.43    0.53 
  -8 -20   0    0.14    0.71 
   8 -20   0    0.77    0.58 
   8 -20   0   -0.08    0.66 
  -8  20   0   -0.39    0.81 
   8  20   0    0.16    0.70 
   8  20   0   -0.08    0.56 
   8  20   0   -0.43    0.59 
   9 -20   0    0.62    0.64 
  -9 -20   0    0.71    0.76 
   9 -20   0    1.01    0.73 
   9  20   0    1.41    0.64 
  -9  20   0   -0.02    0.92 
   9  20   0    2.10    0.67 
   9  20   0    1.89    0.73 
 -10 -20   0    0.67    0.78 
  10 -20   0    1.05    0.76 
 -10  20   0    1.02    0.94 
  10  20   0    1.61    0.71 
  10  20   0    0.61    0.65 
 -11 -20   0   -0.95    0.78 
  11 -20   0    0.49    0.79 
  11  20   0   -0.71    0.63 
 -11  20   0    0.65    0.95 
  11  20   0   -1.45    0.64 
 -12 -20   0    5.27    1.06 
  12 -20   0    4.79    0.97 
 -12  20   0    2.99    1.13 
  12  20   0    7.17    0.98 
  12  20   0    4.88    0.94 
  13 -20   0    1.61    0.84 
 -13 -20   0    3.48    1.02 
 -13  20   0    2.62    1.08 
  13  20   0    0.25    0.77 
  13  20   0    2.39    0.75 
   0 -21   0    0.18    0.60 
   0 -21   0    0.53    0.48 
   0  21   0    0.61    0.48 
   0  21   0    0.40    0.41 
   0  21   0    0.39    0.70 
  -1 -21   0    9.36    1.16 
  -1 -21   0   10.51    1.09 
   1 -21   0    8.80    1.16 
   1 -21   0   11.20    1.11 
  -1  21   0   12.45    1.09 
   1  21   0   10.49    1.11 
  -1  21   0   11.46    1.10 
   1  21   0    9.58    1.08 
  -1  21   0    8.88    1.23 
   1  21   0    8.97    1.28 
   2 -21   0    2.05    0.57 
   2 -21   0    1.94    0.64 
  -2 -21   0    3.10    0.69 
  -2 -21   0    2.36    0.52 
  -2  21   0    1.16    0.74 
   2  21   0    3.31    0.79 
  -2  21   0    1.95    0.44 
   2  21   0    1.16    0.50 
   2  21   0    2.12    0.56 
  -2  21   0    1.35    0.50 
   3 -21   0   22.65    2.19 
  -3 -21   0   24.20    2.15 
  -3 -21   0   22.66    2.30 
  -3  21   0   24.05    2.15 
   3  21   0   24.73    2.18 
  -3  21   0   20.29    2.30 
   3  21   0   19.04    2.29 
   3  21   0   25.18    2.14 
  -3  21   0   24.96    2.08 
   4 -21   0   13.56    1.37 
  -4 -21   0   12.23    1.37 
   4 -21   0    7.45    1.25 
  -4 -21   0   14.13    1.29 
   4  21   0   12.13    1.27 
  -4  21   0   12.86    1.27 
  -4  21   0   13.32    1.43 
  -4  21   0   13.01    1.30 
   4  21   0   12.37    1.29 
   4  21   0   11.05    1.40 
  -5 -21   0    3.89    0.81 
   5 -21   0    3.08    0.72 
   5 -21   0    3.75    0.72 
  -5 -21   0    3.55    0.58 
   5  21   0    3.13    0.64 
   5  21   0    2.65    0.67 
  -5  21   0    3.02    0.87 
   5  21   0    1.07    0.81 
   6 -21   0    1.67    0.63 
  -6 -21   0    1.94    0.76 
   6 -21   0    0.45    0.65 
   6  21   0    1.67    0.60 
   6  21   0    1.03    0.77 
   6  21   0    1.84    0.61 
  -6  21   0    1.83    0.86 
   7 -21   0    0.64    0.67 
   7 -21   0    1.15    0.61 
  -7 -21   0    1.52    0.77 
  -7  21   0    1.65    0.89 
   7  21   0    0.83    0.72 
   7  21   0    0.52    0.60 
   7  21   0    0.65    0.61 
   8 -21   0    1.88    0.65 
   8 -21   0    0.91    0.73 
  -8 -21   0    0.90    0.76 
   8  21   0    2.24    0.68 
   8  21   0    2.10    0.68 
  -8  21   0    1.87    0.92 
   8  21   0    2.45    0.77 
   9 -21   0    5.23    0.93 
  -9 -21   0    4.70    0.96 
   9 -21   0    5.78    1.05 
  -9  21   0    4.65    1.10 
   9  21   0    4.57    0.84 
   9  21   0    5.42    0.97 
   9  21   0    4.52    0.85 
  10 -21   0   -0.83    0.71 
 -10 -21   0    0.61    0.81 
  10  21   0    0.37    0.68 
  10  21   0    0.46    0.66 
 -10  21   0   -0.80    0.95 
 -11 -21   0    2.73    0.97 
  11 -21   0    3.27    0.91 
  11  21   0    5.09    0.84 
  11  21   0    4.78    0.90 
 -11  21   0    2.45    1.16 
  12 -21   0    0.26    0.83 
 -12 -21   0    0.78    0.95 
 -12  21   0    2.26    1.08 
  12  21   0   -0.20    0.74 
  12  21   0    0.12    0.76 
 -13 -21   0    0.69    0.93 
  13 -21   0    2.46    0.94 
 -13  21   0    1.84    1.09 
  13  21   0    0.33    0.83 
  13  21   0    2.55    0.80 
   0 -22   0    7.22    0.82 
   0 -22   0    7.85    0.95 
   0  22   0    7.98    1.05 
   0  22   0    4.57    0.71 
   0  22   0    4.85    0.78 
  -1 -22   0    6.21    0.91 
   1 -22   0    6.82    0.83 
  -1 -22   0    6.84    0.81 
   1 -22   0    7.26    0.94 
   1  22   0    6.02    0.82 
  -1  22   0    6.51    0.75 
  -1  22   0    5.19    0.78 
   1  22   0    5.75    0.75 
  -1  22   0    5.92    1.01 
   1  22   0    6.05    1.03 
  -2 -22   0   -0.20    0.61 
   2 -22   0   -0.28    0.59 
   2 -22   0    0.51    0.51 
  -2 -22   0    0.25    0.46 
  -2  22   0    0.92    0.75 
   2  22   0   -0.23    0.46 
   2  22   0   -0.37    0.72 
  -2  22   0    0.33    0.48 
  -2  22   0    0.34    0.39 
   2  22   0    0.64    0.53 
  -3 -22   0    0.39    0.66 
   3 -22   0    0.06    0.53 
  -3 -22   0    0.26    0.45 
   3 -22   0    0.51    0.61 
   3  22   0    0.26    0.50 
  -3  22   0    0.06    0.76 
   3  22   0    0.22    0.79 
   3  22   0    0.17    0.53 
  -3  22   0    0.42    0.39 
  -3  22   0    0.19    0.46 
  -4 -22   0   24.95    2.13 
   4 -22   0   24.12    2.20 
  -4 -22   0   21.71    2.27 
  -4  22   0   22.28    2.31 
   4  22   0   20.99    2.35 
  -4  22   0   22.28    2.12 
   4  22   0   22.78    2.17 
   4  22   0   23.88    2.16 
   5 -22   0   -0.74    0.57 
   5 -22   0   -0.21    0.59 
  -5 -22   0    1.16    0.76 
  -5 -22   0    0.49    0.45 
   5  22   0    0.44    0.54 
   5  22   0   -0.63    0.72 
  -5  22   0    2.07    0.82 
   5  22   0    1.61    0.64 
   6 -22   0   -0.32    0.62 
  -6 -22   0    1.00    0.77 
   6 -22   0   -0.22    0.61 
   6  22   0   -0.88    0.55 
   6  22   0    0.95    0.77 
   6  22   0   -0.01    0.55 
  -6  22   0    1.03    0.84 
   7 -22   0    2.27    0.68 
   7 -22   0    1.98    0.70 
  -7 -22   0    1.33    0.81 
   7  22   0    1.29    0.79 
  -7  22   0   -0.14    0.88 
   7  22   0    1.25    0.65 
   7  22   0    1.61    0.66 
  -8 -22   0    3.92    0.94 
   8 -22   0    4.29    0.90 
   8 -22   0    3.16    0.79 
   8  22   0    4.58    0.81 
  -8  22   0    3.06    1.06 
   8  22   0    5.25    0.94 
   8  22   0    4.17    0.77 
   9 -22   0   -0.07    0.70 
  -9 -22   0    1.04    0.83 
   9  22   0    0.42    0.67 
   9  22   0    2.40    0.84 
   9  22   0   -0.75    0.66 
  -9  22   0   -0.82    0.93 
  10 -22   0    1.85    0.83 
 -10 -22   0    2.18    0.88 
 -10  22   0    1.84    1.10 
  10  22   0    1.96    0.76 
  10  22   0    2.15    0.79 
 -11 -22   0    2.33    0.97 
  11 -22   0    4.16    0.96 
  11  22   0    4.08    0.85 
 -11  22   0    1.52    1.17 
  11  22   0    2.15    0.83 
 -12 -22   0   -0.46    0.88 
  12 -22   0    1.36    0.84 
  12  22   0   -0.96    0.72 
 -12  22   0   -0.11    1.06 
  12  22   0   -0.59    0.75 
   0 -23   0    0.45    0.51 
   0 -23   0   -0.22    0.65 
   0  23   0    1.09    0.45 
   0  23   0    0.00    0.49 
   0  23   0    0.17    0.82 
   1 -23   0   15.04    1.60 
   1 -23   0   17.47    1.72 
  -1 -23   0   15.70    1.68 
  -1 -23   0   16.60    1.58 
   1  23   0   15.73    1.52 
  -1  23   0   15.73    1.57 
   1  23   0   12.61    1.69 
  -1  23   0   16.46    1.50 
   1  23   0   15.92    1.60 
  -1  23   0   14.93    1.70 
  -2 -23   0    0.64    0.65 
   2 -23   0    0.24    0.63 
  -2 -23   0    0.36    0.48 
   2 -23   0    1.08    0.58 
   2  23   0    0.08    0.45 
  -2  23   0    1.02    0.44 
   2  23   0    0.21    0.56 
  -2  23   0   -0.14    0.79 
  -2  23   0    1.05    0.51 
   2  23   0    0.48    0.78 
   3 -23   0    0.77    0.64 
  -3 -23   0    1.22    0.70 
  -3 -23   0    1.84    0.53 
   3 -23   0    0.46    0.58 
  -3  23   0    1.59    0.53 
   3  23   0    0.69    0.59 
  -3  23   0    2.46    0.84 
   3  23   0    0.98    0.51 
   3  23   0    1.46    0.83 
  -4 -23   0    9.54    1.17 
   4 -23   0    5.72    1.05 
  -4 -23   0    9.93    0.97 
   4 -23   0    9.45    1.07 
  -4  23   0    8.58    0.97 
   4  23   0    7.83    1.18 
   4  23   0    8.88    1.01 
   4  23   0    8.14    1.03 
  -4  23   0    8.34    1.19 
  -5 -23   0    7.66    1.00 
   5 -23   0    4.79    0.84 
   5 -23   0    2.04    0.79 
   5  23   0    5.69    1.02 
  -5  23   0    5.82    1.05 
   5  23   0    5.85    0.80 
  -5  23   0    5.71    0.75 
   5  23   0    5.87    0.84 
  -6 -23   0    0.07    0.77 
   6 -23   0    1.17    0.67 
   6 -23   0    1.49    0.69 
   6  23   0    0.47    0.62 
  -6  23   0    0.60    0.86 
   6  23   0   -0.45    0.78 
   6  23   0   -0.35    0.61 
   7 -23   0    3.96    0.82 
   7 -23   0    3.80    0.78 
  -7 -23   0    2.88    0.94 
  -7  23   0    3.75    1.03 
   7  23   0    3.97    0.75 
   7  23   0    3.03    0.75 
   7  23   0    2.35    0.89 
  -8 -23   0    4.80    0.97 
   8 -23   0    3.46    0.85 
  -8  23   0    3.81    1.12 
   8  23   0    4.16    0.82 
   8  23   0    3.31    0.84 
   8  23   0    5.04    0.98 
   9 -23   0    3.99    0.93 
  -9 -23   0    2.43    0.99 
   9  23   0    4.36    1.12 
   9  23   0    3.31    0.82 
   9  23   0    4.76    0.88 
  -9  23   0    3.09    1.12 
  10 -23   0    2.12    0.83 
 -10 -23   0    0.83    0.90 
 -10  23   0    1.25    1.11 
  10  23   0    0.52    0.73 
  10  23   0    1.04    0.74 
 -11 -23   0    1.12    0.95 
  11 -23   0   -0.94    0.83 
  11  23   0   -0.01    0.75 
  11  23   0    0.74    0.82 
 -11  23   0   -0.04    1.15 
  12 -23   0   -0.51    0.82 
 -12 -23   0   -0.54    0.94 
  12  23   0    0.72    0.79 
  12  23   0   -0.23    0.76 
 -12  23   0    0.08    1.09 
   0 -24   0   20.11    2.01 
   0 -24   0   19.97    1.88 
   0  24   0   18.42    1.80 
   0  24   0   19.14    1.85 
   0  24   0   20.35    2.10 
  -1 -24   0    7.34    1.04 
  -1 -24   0    8.05    0.95 
   1 -24   0    7.76    0.96 
   1 -24   0    8.86    1.06 
   1  24   0    8.56    1.18 
   1  24   0    7.60    0.87 
  -1  24   0    7.25    0.86 
  -1  24   0    8.38    0.94 
   1  24   0    7.90    0.94 
  -1  24   0    6.92    1.14 
   2 -24   0   -0.01    0.65 
   2 -24   0    0.17    0.54 
  -2 -24   0   -0.50    0.66 
  -2 -24   0    0.14    0.49 
  -2  24   0    0.26    0.45 
   2  24   0    0.41    0.57 
   2  24   0   -0.18    0.78 
   2  24   0    0.51    0.51 
  -2  24   0    1.05    0.81 
  -2  24   0    0.01    0.48 
  -3 -24   0   -0.18    0.47 
   3 -24   0    0.98    0.69 
   3 -24   0    0.13    0.59 
  -3 -24   0    0.56    0.72 
  -3  24   0   -0.34    0.50 
   3  24   0   -0.59    0.58 
   3  24   0    0.47    0.53 
  -3  24   0    0.79    0.81 
   3  24   0   -0.22    0.80 
   4 -24   0   15.59    1.58 
  -4 -24   0   15.59    1.49 
  -4 -24   0   13.92    1.59 
   4 -24   0   10.86    1.49 
   4  24   0   16.84    1.53 
   4  24   0   11.95    1.64 
  -4  24   0   15.90    1.47 
  -4  24   0   14.19    1.66 
   4  24   0   14.65    1.52 
   5 -24   0    5.49    0.86 
   5 -24   0    1.86    0.77 
  -5 -24   0    4.71    0.95 
   5  24   0    4.64    0.98 
   5  24   0    3.67    0.81 
   5  24   0    3.68    0.73 
  -5  24   0    3.45    0.98 
  -5  24   0    5.47    0.71 
   6 -24   0    7.33    1.03 
  -6 -24   0    6.04    1.11 
   6 -24   0    5.92    1.01 
  -6  24   0    7.80    0.89 
   6  24   0    8.83    0.98 
  -6  24   0    7.97    1.24 
   6  24   0    6.81    0.99 
   6  24   0    5.37    1.12 
  -7 -24   0    0.30    0.83 
   7 -24   0   -1.20    0.68 
   7 -24   0   -0.24    0.67 
  -7  24   0    0.08    0.93 
   7  24   0   -0.06    0.84 
   7  24   0   -0.16    0.64 
   7  24   0    0.45    0.67 
   8 -24   0    4.69    0.94 
  -8 -24   0    4.44    1.05 
   8  24   0    6.36    0.98 
  -8  24   0    3.93    1.16 
   8  24   0    5.22    1.01 
   8  24   0    4.21    0.87 
   9 -24   0    0.15    0.80 
  -9 -24   0   -0.96    0.87 
  -9  24   0    0.70    1.05 
   9  24   0    0.42    0.74 
   9  24   0    0.90    0.76 
  10 -24   0    5.49    1.08 
 -10 -24   0    4.43    1.18 
  10  24   0    6.94    1.06 
  10  24   0    6.94    1.09 
 -10  24   0    6.71    1.42 
 -11 -24   0   -0.20    0.98 
  11 -24   0   -0.38    0.85 
  11  24   0    0.42    0.83 
  11  24   0   -0.34    0.78 
 -11  24   0    0.08    1.21 
   0 -25   0    0.25    0.53 
   0 -25   0   -0.44    0.67 
   0  25   0   -0.42    0.44 
   0  25   0    0.16    0.82 
   0  25   0    0.70    0.54 
  -1 -25   0    6.54    0.81 
  -1 -25   0    5.83    0.95 
   1 -25   0    5.31    0.81 
   1 -25   0    5.15    0.91 
   1  25   0    5.06    0.81 
  -1  25   0    4.48    1.03 
  -1  25   0    6.49    0.79 
  -1  25   0    5.73    0.70 
   1  25   0    5.64    1.06 
   1  25   0    4.39    0.72 
   2 -25   0    2.09    0.65 
   2 -25   0    3.18    0.79 
  -2 -25   0    2.97    0.75 
  -2 -25   0    1.74    0.57 
   2  25   0    1.08    0.55 
   2  25   0    1.55    0.61 
  -2  25   0    0.73    0.85 
   2  25   0    1.88    0.91 
  -2  25   0    2.95    0.59 
  -3 -25   0    4.66    0.90 
   3 -25   0    4.63    0.77 
  -3 -25   0    2.86    0.65 
   3 -25   0    3.96    0.83 
   3  25   0    2.97    0.67 
   3  25   0    5.48    1.01 
  -3  25   0    4.45    0.97 
  -3  25   0    3.22    0.67 
   3  25   0    3.65    0.76 
  -4 -25   0    1.64    0.77 
   4 -25   0    0.96    0.63 
  -4 -25   0    0.39    0.61 
   4 -25   0    0.00    0.66 
   4  25   0   -0.56    0.81 
  -4  25   0    0.75    0.52 
  -4  25   0   -0.36    0.85 
   4  25   0    0.61    0.56 
   4  25   0    0.15    0.65 
   5 -25   0   11.87    1.25 
   5 -25   0    5.94    1.18 
  -5 -25   0   10.16    1.30 
   5  25   0   10.78    1.22 
  -5  25   0   12.02    1.43 
   5  25   0    9.62    1.39 
  -5  25   0   11.09    1.12 
   5  25   0   10.92    1.16 
   6 -25   0   -0.16    0.69 
  -6 -25   0    0.26    0.85 
   6 -25   0   -0.27    0.66 
   6  25   0   -0.73    0.84 
  -6  25   0    0.94    0.93 
   6  25   0    1.58    0.65 
   6  25   0   -0.02    0.71 
  -6  25   0    0.85    0.55 
   7 -25   0    1.41    0.77 
  -7 -25   0    4.44    0.98 
   7  25   0    2.19    0.94 
   7  25   0    2.93    0.81 
   7  25   0    3.33    0.75 
  -7  25   0    2.20    1.11 
  -8 -25   0    1.67    0.94 
   8 -25   0    1.36    0.83 
   8  25   0    1.63    0.71 
  -8  25   0    0.54    1.03 
   8  25   0   -0.13    0.77 
   8  25   0    1.26    0.91 
  -9 -25   0    0.62    0.92 
   9 -25   0   -0.11    0.75 
   9  25   0   -0.65    0.74 
   9  25   0   -0.99    0.68 
  -9  25   0   -1.01    1.05 
 -10 -25   0    0.23    0.95 
  10 -25   0    0.82    0.83 
  10  25   0   -1.01    0.79 
  10  25   0    0.60    0.77 
 -10  25   0    0.53    1.21 
   0 -26   0   -0.58    0.64 
   0 -26   0   -0.09    0.55 
   0  26   0    0.96    0.56 
   0  26   0    0.02    0.85 
   0  26   0    0.59    0.47 
  -1 -26   0    0.60    0.56 
   1 -26   0    0.44    0.58 
  -1 -26   0    0.40    0.70 
   1 -26   0    0.76    0.71 
  -1  26   0    0.53    0.88 
   1  26   0    1.15    0.85 
   1  26   0    0.47    0.49 
  -1  26   0    0.45    0.53 
   1  26   0    0.77    0.55 
  -2 -26   0   -0.54    0.66 
  -2 -26   0    0.46    0.54 
   2 -26   0   -0.21    0.57 
   2 -26   0    0.47    0.72 
   2  26   0   -0.41    0.51 
  -2  26   0    0.05    0.51 
   2  26   0    0.52    0.61 
  -2  26   0   -0.28    0.89 
   2  26   0   -0.51    0.82 
   3 -26   0    1.01    0.75 
  -3 -26   0    1.01    0.76 
   3 -26   0    1.61    0.65 
  -3 -26   0    0.88    0.53 
   3  26   0    0.83    0.63 
  -3  26   0    0.39    0.56 
   3  26   0    0.20    0.56 
  -3  26   0    1.73    0.89 
   3  26   0    0.73    0.87 
   4 -26   0   -0.73    0.69 
  -4 -26   0    0.40    0.75 
   4 -26   0    0.55    0.66 
  -4  26   0    0.53    0.88 
   4  26   0   -0.31    0.56 
   4  26   0    0.90    0.65 
  -4  26   0    0.69    0.53 
   4  26   0    0.81    0.90 
   5 -26   0    3.55    0.93 
  -5 -26   0    4.77    1.03 
   5 -26   0    6.13    0.96 
   5  26   0    5.94    0.95 
  -5  26   0    6.09    1.16 
   5  26   0    4.28    1.12 
   5  26   0    7.95    0.91 
  -5  26   0    7.17    0.83 
   6 -26   0   -0.14    0.73 
  -6 -26   0    1.48    0.84 
   6 -26   0    1.67    0.78 
  -6  26   0    1.00    1.03 
   6  26   0    0.74    0.72 
   6  26   0    1.78    0.66 
  -6  26   0    1.15    0.57 
   6  26   0   -0.30    0.91 
   7 -26   0    1.34    0.78 
  -7 -26   0    0.80    0.91 
   7  26   0    1.94    0.79 
  -7  26   0    1.40    0.59 
  -7  26   0    1.24    1.11 
   7  26   0    0.06    0.88 
   7  26   0    0.70    0.67 
  -8 -26   0   -1.77    0.92 
   8 -26   0    0.98    0.78 
   8  26   0    0.98    0.69 
   8  26   0   -0.72    0.75 
  -8  26   0    0.61    1.06 
   8  26   0   -0.60    0.89 
   9 -26   0   -0.19    0.79 
  -9 -26   0   -0.06    0.98 
  -9  26   0    0.74    1.12 
   9  26   0    0.31    0.71 
   9  26   0   -0.39    0.76 
 -10 -26   0    0.80    1.02 
  10 -26   0   -0.16    0.89 
  10  26   0   -0.65    0.78 
 -10  26   0   -0.04    1.20 
  10  26   0    0.88    0.82 
   0 -27   0   -0.20    0.68 
   0 -27   0    0.94    0.59 
   0  27   0    0.83    0.56 
   0  27   0   -0.24    0.52 
   0  27   0   -0.05    0.85 
  -1 -27   0    3.61    0.87 
   1 -27   0    3.41    0.71 
  -1 -27   0    3.33    0.71 
   1 -27   0    3.39    0.84 
  -1  27   0    3.80    1.05 
   1  27   0    3.18    0.63 
  -1  27   0    3.88    0.69 
   1  27   0    3.65    0.69 
   1  27   0    0.73    0.90 
   2 -27   0    1.78    0.66 
  -2 -27   0    3.13    0.65 
   2 -27   0    1.83    0.82 
  -2 -27   0    1.12    0.79 
   2  27   0    2.46    0.68 
   2  27   0    3.17    0.63 
  -2  27   0    3.91    0.64 
   2  27   0    1.00    0.90 
  -2  27   0    1.12    0.92 
   3 -27   0    0.88    0.73 
  -3 -27   0    0.59    0.67 
  -3 -27   0    1.09    0.74 
   3 -27   0    1.66    0.69 
   3  27   0    0.53    0.66 
  -3  27   0    0.90    0.96 
  -3  27   0    1.57    0.57 
   3  27   0    1.25    0.91 
   3  27   0    0.87    0.56 
  -4 -27   0    0.64    0.80 
   4 -27   0   -1.00    0.72 
   4 -27   0   -0.46    0.66 
  -4  27   0   -1.13    0.90 
   4  27   0   -0.19    0.65 
  -4  27   0    0.64    0.54 
   4  27   0   -1.13    0.92 
   4  27   0   -0.15    0.54 
  -5 -27   0    3.09    0.92 
   5 -27   0    2.04    0.82 
   5 -27   0    2.47    0.80 
  -5  27   0    2.76    1.03 
   5  27   0    4.68    0.86 
  -5  27   0    3.71    0.67 
   5  27   0    1.64    1.01 
   5  27   0    2.25    0.71 
   6 -27   0    4.82    0.99 
  -6 -27   0    5.85    1.08 
   6  27   0    5.65    0.99 
   6  27   0    4.37    1.17 
  -6  27   0    2.76    1.16 
   6  27   0    6.97    0.94 
  -6  27   0    7.67    0.86 
  -7 -27   0    0.63    0.93 
   7 -27   0   -0.88    0.77 
   7  27   0   -1.10    0.90 
   7  27   0   -1.07    0.72 
  -7  27   0    0.04    1.03 
   7  27   0   -0.56    0.64 
  -7  27   0   -0.23    0.64 
  -8 -27   0    0.63    0.94 
   8 -27   0   -1.20    0.80 
   8  27   0   -0.60    0.76 
   8  27   0   -0.52    0.65 
   8  27   0    0.41    1.00 
  -8  27   0    0.01    1.08 
   9 -27   0    1.37    0.89 
  -9 -27   0    2.13    1.02 
   9  27   0    2.39    0.90 
  -9  27   0    1.84    1.18 
   9  27   0    0.94    0.81 
   0 -28   0    0.92    0.64 
   0 -28   0    3.68    0.81 
   0  28   0    2.13    0.92 
   0  28   0    2.31    0.63 
  -1 -28   0    6.53    0.85 
   1 -28   0    4.14    0.93 
   1 -28   0    5.89    0.87 
  -1 -28   0    5.08    0.99 
  -1  28   0    4.51    1.15 
   1  28   0    5.17    1.12 
   1  28   0    5.83    0.77 
   1  28   0    6.19    0.86 
  -1  28   0    5.27    0.83 
   2 -28   0    0.46    0.64 
  -2 -28   0    0.22    0.57 
   2 -28   0    0.15    0.77 
  -2 -28   0    1.10    0.75 
   2  28   0   -0.51    0.53 
  -2  28   0    1.02    0.95 
   2  28   0   -0.73    0.90 
   2  28   0    1.15    0.66 
  -2  28   0   -0.05    0.54 
   3 -28   0    2.74    0.81 
   3 -28   0    3.12    0.75 
  -3 -28   0    2.71    0.82 
  -3  28   0    2.81    0.64 
   3  28   0    2.48    0.63 
   3  28   0    3.08    1.05 
   3  28   0    3.12    0.77 
  -3  28   0    1.44    1.01 
  -4 -28   0    2.18    0.87 
   4 -28   0    1.42    0.71 
   4 -28   0    0.08    0.78 
   4  28   0    1.50    1.03 
   4  28   0    1.61    0.64 
   4  28   0    2.61    0.76 
  -4  28   0    2.71    0.62 
  -4  28   0    0.54    1.01 
  -5 -28   0   -0.01    0.81 
   5 -28   0    0.89    0.74 
  -5  28   0   -0.10    1.05 
   5  28   0   -0.26    0.70 
   5  28   0    0.67    0.95 
   5  28   0    1.52    0.65 
  -5  28   0    0.86    0.58 
   6 -28   0    2.59    0.85 
  -6 -28   0    1.98    0.92 
   6  28   0    1.03    0.78 
  -6  28   0    2.21    0.63 
   6  28   0    0.36    0.69 
  -6  28   0    1.97    1.11 
   6  28   0    1.06    1.00 
   7 -28   0   -0.93    0.79 
  -7 -28   0    0.95    0.90 
   7  28   0   -0.07    0.80 
   7  28   0   -0.63    0.64 
   7  28   0   -1.91    0.92 
  -7  28   0    0.59    1.11 
   8 -28   0   -1.21    0.81 
  -8 -28   0    1.01    0.96 
  -8  28   0    0.66    1.22 
   8  28   0   -0.98    0.81 
   8  28   0    0.88    0.70 
   0 -29   0   -0.63    0.59 
   0 -29   0    1.25    0.79 
   0  29   0    1.21    0.92 
   0  29   0   -0.15    0.55 
   1 -29   0    3.85    0.85 
   1 -29   0    2.53    0.71 
  -1 -29   0    3.17    0.84 
  -1 -29   0    2.60    0.71 
  -1  29   0    3.09    0.70 
  -1  29   0    4.07    1.05 
   1  29   0    3.33    0.74 
   1  29   0    3.10    1.01 
   2 -29   0    1.96    0.74 
  -2 -29   0    1.65    0.86 
   2 -29   0    3.06    0.87 
   2  29   0    0.56    0.93 
   2  29   0    2.16    0.64 
   2  29   0    3.35    0.72 
  -2  29   0    2.20    1.02 
  -2  29   0    2.69    0.66 
   3 -29   0    0.52    0.68 
   3 -29   0   -0.73    0.74 
  -3 -29   0    0.73    0.80 
   3  29   0   -0.22    0.70 
  -3  29   0   -0.20    0.96 
   3  29   0    1.01    1.01 
   3  29   0    0.13    0.58 
  -3  29   0    0.23    0.56 
   4 -29   0   -0.46    0.68 
   4 -29   0    0.57    0.80 
  -4 -29   0   -0.24    0.81 
   4  29   0   -0.10    0.99 
   4  29   0    0.26    0.72 
  -4  29   0   -0.98    0.98 
   4  29   0   -0.62    0.55 
  -4  29   0    0.79    0.58 
   5 -29   0    6.77    0.98 
  -5 -29   0    5.88    1.08 
   5  29   0    6.23    0.97 
  -5  29   0    3.90    1.22 
   5  29   0    4.66    0.88 
   5  29   0    4.96    1.20 
  -5  29   0    5.79    0.84 
   6 -29   0    1.64    0.82 
  -6 -29   0    0.37    0.87 
   6  29   0   -0.73    0.74 
  -6  29   0   -0.85    1.11 
   6  29   0    0.59    0.65 
   6  29   0   -0.36    1.01 
  -6  29   0    0.84    0.60 
  -7 -29   0    0.46    0.91 
   7 -29   0    1.14    0.85 
  -7  29   0    0.62    1.12 
   7  29   0   -0.16    0.71 
   7  29   0   -0.66    0.78 
   7  29   0   -0.86    1.00 
   0 -30   0    5.53    0.97 
   0 -30   0    4.73    0.82 
   0  30   0    3.18    0.72 
   0  30   0    2.89    1.08 
  -1 -30   0    5.51    1.00 
   1 -30   0    5.09    0.96 
  -1 -30   0    5.05    0.84 
   1 -30   0    4.96    0.85 
  -1  30   0    1.54    1.06 
  -1  30   0    5.08    0.81 
   1  30   0    3.94    1.10 
   1  30   0    6.61    0.85 
   2 -30   0    1.10    0.70 
   2 -30   0    0.67    0.80 
  -2 -30   0    1.06    0.81 
   2  30   0    1.00    0.99 
  -2  30   0    0.80    0.59 
  -2  30   0    1.32    1.06 
   2  30   0    1.43    0.72 
   3 -30   0    0.80    0.72 
  -3 -30   0    0.92    0.84 
   3 -30   0    0.66    0.80 
  -3  30   0    0.70    1.01 
   3  30   0   -0.87    0.65 
   3  30   0    0.44    0.59 
   3  30   0    0.84    0.97 
  -3  30   0    0.91    0.60 
   4 -30   0   -0.93    0.66 
  -4 -30   0   -0.43    0.81 
   4  30   0   -0.54    0.73 
   4  30   0   -0.93    1.01 
  -4  30   0    0.95    1.11 
   4  30   0    0.20    0.58 
  -4  30   0    0.67    0.58 
  -5 -30   0    1.25    0.84 
   5 -30   0    0.97    0.80 
   5  30   0   -0.07    0.74 
   5  30   0    0.19    0.63 
  -5  30   0   -0.50    1.12 
  -5  30   0    1.19    0.61 
   5  30   0   -1.10    1.02 
  -6 -30   0    9.64    1.34 
   6 -30   0    8.35    1.23 
  -6  30   0    7.07    1.48 
   6  30   0   10.88    1.25 
   6  30   0    6.53    1.40 
   6  30   0   11.32    1.21 
   0 -31   0    0.35    0.81 
   0 -31   0   -0.29    0.63 
   0  31   0    0.46    0.59 
   0  31   0   -0.26    0.99 
   1 -31   0    3.57    0.82 
  -1 -31   0    3.20    0.92 
   1 -31   0    4.38    0.91 
  -1  31   0    3.90    0.76 
   1  31   0    1.65    1.07 
  -1  31   0    2.81    1.07 
   1  31   0    3.90    0.77 
   2 -31   0    1.62    0.73 
   2 -31   0    1.61    0.86 
  -2 -31   0    1.82    0.89 
  -2  31   0    2.36    0.69 
   2  31   0    2.42    1.08 
   2  31   0    3.61    0.78 
  -2  31   0    2.44    1.09 
   3 -31   0    1.44    0.75 
   3 -31   0    2.43    1.29 
  -3 -31   0    2.76    0.88 
   3  31   0    2.18    0.81 
  -3  31   0    1.47    1.10 
   3  31   0    2.95    1.08 
  -3  31   0    1.22    0.63 
  -4 -31   0   -1.19    0.78 
   4 -31   0   -1.28    0.70 
  -4  31   0    1.03    0.60 
   4  31   0    0.19    0.73 
   4  31   0    2.21    1.07 
   4  31   0   -0.34    0.62 
  -4  31   0    1.73    1.11 
   5 -31   0   13.42    1.59 
  -5 -31   0   12.65    1.57 
   5  31   0   13.61    1.45 
  -5  31   0   10.56    1.74 
   5  31   0   13.18    1.74 
  -5  31   0   13.71    1.41 
   5  31   0   14.15    1.57 
   0 -32   0    7.38    1.16 
   0 -32   0    7.14    1.08 
   0  32   0    7.67    1.35 
   0  32   0    8.47    1.02 
  -1 -32   0    1.22    0.85 
   1 -32   0    0.41    0.69 
   1 -32   0    0.42    0.81 
   1  32   0    1.99    1.06 
  -1  32   0    0.48    0.62 
  -1  32   0    0.09    0.99 
   1  32   0   -0.30    0.65 
   2 -32   0   -0.39    0.66 
   2 -32   0    0.52    0.83 
  -2 -32   0    0.09    0.83 
   2  32   0   -0.66    0.97 
  -2  32   0    1.07    1.07 
  -2  32   0   -0.45    0.60 
   2  32   0    1.50    0.74 
  -3 -32   0    0.99    0.85 
   3 -32   0   -0.88    0.67 
   3  32   0    0.86    0.72 
   3  32   0    1.47    1.06 
  -3  32   0   -1.14    1.12 
  -3  32   0    0.39    0.62 
  17   0  -1    4.09    0.95 
 -17   0   1    4.04    0.81 
  16   0  -1    0.06    0.74 
 -16   0   1    0.08    0.62 
  16   0  -1    0.55    0.61 
 -15   0   1    4.32    0.72 
  15   0  -1    3.58    0.81 
  15   0  -1    2.44    0.61 
  14   0  -1    0.12    0.45 
 -14   0   1    0.34    0.46 
  14   0  -1    0.93    0.80 
 -14   0   1    0.53    0.54 
  14   0  -1   -0.08    0.63 
 -13   0   1   36.76    3.33 
  13   0  -1   38.13    3.31 
 -13   0   1   40.34    3.31 
  13   0  -1   39.15    3.29 
  13   0  -1   34.09    3.35 
  13   0  -1   38.07    3.38 
  12   0  -1   -0.01    0.52 
  12   0  -1    0.21    0.54 
 -12   0   1   -0.45    0.38 
 -12   0   1    0.62    0.49 
  12   0  -1   -0.22    0.37 
  12   0  -1    0.29    0.43 
 -11   0   1    3.47    0.51 
  11   0  -1    3.18    0.62 
  11   0  -1    2.95    0.61 
 -11   0   1    3.26    0.57 
  11   0  -1    4.04    0.52 
  11   0  -1    3.63    0.54 
 -10   0   1   -0.23    0.38 
  10   0  -1    0.30    0.31 
  10   0  -1    0.34    0.45 
  10   0  -1   -0.09    0.33 
 -10   0   1   -0.16    0.32 
  10   0  -1   -0.33    0.41 
   9   0  -1   -0.20    0.31 
   9   0  -1    0.24    0.39 
  -9   0   1    0.49    0.34 
  -9   0   1    0.17    0.29 
   9   0  -1    0.91    0.40 
   9   0  -1    0.25    0.29 
  -8   0   1   -0.44    0.25 
   8   0  -1    0.49    0.27 
   8   0  -1    0.51    0.28 
  -8   0   1   -0.33    0.31 
   8   0  -1    0.12    0.36 
   8   0  -1    0.45    0.31 
   8   0  -1   -0.17    0.34 
   7   0  -1   27.30    2.40 
  -7   0   1   27.46    2.40 
   7   0  -1   25.31    2.41 
   7   0  -1   26.47    2.40 
  -7   0   1   29.13    2.42 
   7   0  -1   30.03    2.44 
   7   0  -1   30.33    2.43 
  -6   0   1    0.06    0.23 
   6   0  -1    0.09    0.22 
   6   0  -1    0.02    0.30 
   6   0  -1    0.12    0.30 
   6   0  -1    0.12    0.24 
   6   0  -1    0.28    0.27 
  -6   0   1    0.12    0.25 
   5   0  -1    4.33    0.52 
   5   0  -1    4.64    0.49 
   5   0  -1    4.12    0.48 
   5   0  -1    3.83    0.51 
  -5   0   1    5.11    0.52 
   5   0  -1    4.98    0.48 
   5   0  -1    5.37    0.50 
  -4   0   1   -0.28    0.20 
   4   0  -1    0.01    0.19 
   4   0  -1    0.15    0.22 
   4   0  -1    0.11    0.21 
   4   0  -1   -0.05    0.27 
   4   0  -1   -0.15    0.26 
   4   0  -1   -0.31    0.23 
   3   0  -1   10.55    0.97 
   3   0  -1   10.55    0.99 
   3   0  -1   11.24    0.98 
   3   0  -1   11.75    1.00 
   3   0  -1   10.93    0.98 
   3   0  -1   11.28    0.99 
   2   0  -1   -0.34    0.15 
   2   0  -1    0.11    0.13 
   2   0  -1    0.14    0.18 
  -2   0   1    0.09    0.12 
   2   0  -1    0.22    0.15 
   2   0  -1    0.25    0.14 
   2   0  -1   -0.09    0.13 
   1   0  -1    0.57    0.09 
  -1   0   1    0.53    0.08 
   1   0  -1    0.43    0.09 
   1   0  -1    0.62    0.09 
   1   0  -1    0.31    0.08 
  -1   0   1    0.31    0.08 
   1   0  -1    0.52    0.10 
   1   0  -1    0.53    0.08 
   1   0   1   10.28    0.85 
   1   0   1   10.75    0.85 
   1   0   1    9.06    0.86 
  -2   0  -1    0.19    0.15 
   2   0   1   -0.08    0.14 
   2   0   1    0.04    0.13 
   2   0   1   -0.11    0.11 
   2   0   1    0.15    0.17 
  -3   0  -1  162.77   13.33 
   3   0   1  161.86   13.33 
   3   0   1  155.78   13.33 
   3   0   1  154.53   13.32 
   3   0   1  160.59   13.34 
   4   0   1   -0.18    0.19 
   4   0   1   -0.03    0.18 
  -4   0  -1    0.04    0.21 
   4   0   1   -0.18    0.23 
   4   0   1    0.36    0.26 
   4   0   1   -0.18    0.23 
  -5   0  -1    0.32    0.23 
   5   0   1    0.54    0.29 
   5   0   1    0.57    0.22 
   5   0   1    0.40    0.27 
   5   0   1    0.25    0.19 
  -6   0  -1   -0.36    0.23 
   6   0   1    0.14    0.20 
   6   0   1    0.21    0.23 
   6   0   1    0.19    0.30 
   6   0   1    0.27    0.28 
  -7   0  -1   79.61    6.31 
   7   0   1   69.16    6.31 
   7   0   1   75.12    6.30 
   7   0   1   72.81    6.33 
   7   0   1   77.06    6.31 
   8   0   1   -0.08    0.26 
  -8   0  -1    0.12    0.26 
   8   0   1   -0.08    0.24 
   8   0   1    0.30    0.37 
   8   0   1   -0.08    0.32 
  -8   0  -1    0.14    0.31 
   9   0   1   22.82    2.20 
   9   0   1   25.86    2.18 
  -9   0  -1   25.86    2.18 
   9   0   1   23.52    2.23 
   9   0   1   25.81    2.16 
  -9   0  -1   24.81    2.20 
  10   0   1    0.24    0.46 
 -10   0  -1    0.39    0.34 
  10   0   1    0.18    0.32 
  10   0   1   -0.08    0.40 
  10   0   1    0.48    0.31 
 -10   0  -1   -0.21    0.38 
 -11   0  -1   -0.29    0.35 
  11   0   1   -0.17    0.32 
  11   0   1    0.10    0.36 
  11   0   1    0.39    0.46 
 -11   0  -1   -0.07    0.41 
  11   0   1    0.04    0.51 
 -12   0  -1    0.12    0.39 
  12   0   1   -0.36    0.41 
  12   0   1   -0.08    0.52 
  12   0   1    0.10    0.55 
 -12   0  -1   -0.34    0.47 
  12   0   1   -0.39    0.36 
  13   0   1    2.12    0.60 
  13   0   1    0.25    0.62 
  13   0   1    0.92    0.43 
 -13   0  -1    0.52    0.54 
  13   0   1    1.18    0.44 
 -13   0  -1    0.94    0.45 
  14   0   1    0.21    0.46 
 -14   0  -1   -0.37    0.54 
  14   0   1    0.31    0.66 
 -14   0  -1   -0.17    0.45 
  14   0   1   -0.17    0.43 
  15   0   1    5.15    0.70 
 -15   0  -1    5.46    0.81 
  15   0   1    2.78    0.86 
  16   0   1    0.52    0.73 
 -16   0  -1    1.52    0.68 
 -17   0  -1    0.71    0.69 
  17   0   1    1.17    0.84 
  17  -1  -1    0.16    0.84 
 -17  -1   1    0.82    0.68 
 -17   1   1    0.84    0.66 
  17   1  -1    1.10    0.79 
  16  -1  -1   -0.28    0.72 
 -16  -1   1    1.71    0.66 
  16   1  -1   -0.27    0.71 
 -16   1   1    2.03    0.65 
  16   1  -1    1.05    0.57 
  15  -1  -1    2.29    0.74 
  15  -1  -1    1.86    0.55 
 -15  -1   1    3.50    0.67 
  15   1  -1    2.72    0.59 
 -15   1   1    2.96    0.66 
  15   1  -1    2.10    0.79 
 -14  -1   1   37.57    3.36 
  14  -1  -1   33.75    3.36 
  14  -1  -1   35.48    3.38 
  14  -1  -1   38.70    3.29 
 -14  -1   1   39.11    3.39 
 -14   1   1   35.93    3.34 
 -14   1   1   38.25    3.29 
  14   1  -1   37.28    3.40 
  14   1  -1   40.53    3.30 
  14   1  -1   38.60    3.29 
 -13  -1   1    1.20    0.51 
  13  -1  -1    0.14    0.58 
  13  -1  -1   -0.60    0.40 
 -13  -1   1   -0.54    0.41 
  13  -1  -1    0.10    0.59 
 -13   1   1    0.79    0.50 
 -13   1   1    0.14    0.43 
  13   1  -1    0.77    0.58 
  13   1  -1   -0.33    0.43 
  13   1  -1    0.44    0.42 
  13   1  -1    0.36    0.59 
  12  -1  -1    1.70    0.58 
 -12  -1   1    1.47    0.52 
  12  -1  -1    0.40    0.39 
  12  -1  -1    1.29    0.58 
  12  -1  -1    1.24    0.43 
 -12  -1   1    0.47    0.39 
 -12   1   1    0.50    0.41 
  12   1  -1    1.25    0.55 
  12   1  -1    1.32    0.55 
  12   1  -1    1.50    0.45 
 -12   1   1    1.56    0.48 
  12   1  -1    0.66    0.41 
 -11  -1   1   17.47    1.72 
  11  -1  -1   17.32    1.65 
 -11  -1   1   19.15    1.66 
  11  -1  -1   16.37    1.65 
  11  -1  -1   17.92    1.74 
  11  -1  -1   18.87    1.75 
 -11   1   1   19.60    1.68 
  11   1  -1   17.43    1.72 
  11   1  -1   18.31    1.66 
  11   1  -1   19.23    1.77 
 -11   1   1   17.06    1.69 
  11   1  -1   18.58    1.67 
  10  -1  -1    0.84    0.36 
 -10  -1   1    1.06    0.42 
  10  -1  -1    1.21    0.46 
 -10  -1   1    0.58    0.34 
  10  -1  -1    0.06    0.33 
  10  -1  -1    1.96    0.48 
  10   1  -1    0.86    0.46 
 -10   1   1    0.64    0.38 
  10   1  -1    0.84    0.48 
  10   1  -1    0.55    0.33 
 -10   1   1    1.13    0.35 
  10   1  -1    1.28    0.37 
   9  -1  -1    3.14    0.46 
   9  -1  -1    3.12    0.52 
  -9  -1   1    3.84    0.47 
   9  -1  -1    3.06    0.44 
  -9  -1   1    3.24    0.52 
   9  -1  -1    2.84    0.53 
   9   1  -1    3.43    0.47 
  -9   1   1    3.78    0.47 
   9   1  -1    2.96    0.53 
   9   1  -1    3.18    0.44 
  -9   1   1    3.86    0.50 
   9   1  -1    3.30    0.53 
  -8  -1   1   12.80    1.18 
   8  -1  -1   13.78    1.21 
   8  -1  -1   11.54    1.12 
  -8  -1   1   11.77    1.14 
   8  -1  -1   14.05    1.19 
   8  -1  -1   12.50    1.14 
   8  -1  -1   10.05    1.17 
   8   1  -1   10.19    1.14 
   8   1  -1   15.00    1.20 
  -8   1   1   13.52    1.15 
   8   1  -1   11.22    1.12 
   8   1  -1   11.85    1.15 
  -8   1   1   11.82    1.16 
   8   1  -1   13.23    1.20 
   7  -1  -1    8.09    0.84 
   7  -1  -1    6.98    0.83 
   7  -1  -1    8.23    0.81 
  -7  -1   1    8.02    0.78 
   7  -1  -1    7.78    0.78 
  -7  -1   1    8.80    0.84 
   7  -1  -1    7.42    0.82 
   7  -1  -1    7.89    0.84 
   7   1  -1    9.08    0.85 
   7   1  -1    8.04    0.81 
   7   1  -1    8.50    0.79 
  -7   1   1    7.77    0.80 
   7   1  -1    8.31    0.86 
   7   1  -1    7.62    0.80 
   6  -1  -1    2.50    0.39 
   6  -1  -1    3.25    0.42 
  -6  -1   1    3.62    0.38 
   6  -1  -1    2.26    0.41 
  -6  -1   1    3.15    0.42 
   6  -1  -1    3.38    0.38 
   6  -1  -1    2.40    0.43 
   6  -1  -1    3.22    0.37 
   6   1  -1    3.25    0.38 
  -6   1   1    3.10    0.38 
   6   1  -1    3.63    0.40 
   6   1  -1    3.15    0.39 
   6   1  -1    2.48    0.42 
   6   1  -1    2.69    0.42 
   5  -1  -1    0.32    0.25 
   5  -1  -1   -0.07    0.27 
   5  -1  -1    0.58    0.23 
   5  -1  -1    0.83    0.21 
   5  -1  -1    0.35    0.28 
  -5  -1   1    0.44    0.21 
  -5  -1   1    0.30    0.26 
   5  -1  -1    0.67    0.28 
   5   1  -1    0.35    0.28 
   5   1  -1    0.24    0.24 
   5   1  -1    0.55    0.30 
   5   1  -1    0.24    0.21 
   5   1  -1    0.58    0.25 
   4  -1  -1   68.02    5.40 
   4  -1  -1   65.38    5.39 
   4  -1  -1   62.08    5.39 
  -4  -1   1   65.89    5.39 
   4  -1  -1   59.18    5.39 
   4  -1  -1   62.92    5.39 
   4  -1  -1   62.53    5.38 
  -4  -1   1   67.73    5.40 
   4   1  -1   59.93    5.39 
   4   1  -1   61.89    5.39 
   4   1  -1   63.12    5.39 
   4   1  -1   69.33    5.40 
   4   1  -1   64.85    5.40 
   3  -1  -1    4.55    0.47 
   3  -1  -1    4.62    0.48 
  -3  -1   1    4.70    0.47 
  -3  -1   1    5.10    0.53 
   3  -1  -1    4.28    0.50 
   3  -1  -1    4.93    0.54 
   3  -1  -1    5.03    0.46 
   3  -1  -1    4.59    0.47 
   3   1  -1    4.61    0.50 
   3   1  -1    4.15    0.49 
   3   1  -1    4.68    0.48 
   3   1  -1    4.39    0.45 
   3   1  -1    4.98    0.52 
   2  -1  -1    4.79    0.51 
  -2  -1   1    4.85    0.50 
   2  -1  -1    5.16    0.49 
  -2  -1   1    5.04    0.47 
   2  -1  -1    5.33    0.51 
   2  -1  -1    4.90    0.48 
   2  -1  -1    4.98    0.49 
   2  -1  -1    5.31    0.47 
  -2  -1   1    5.48    0.47 
   2   1  -1    5.28    0.49 
   2   1  -1    5.05    0.47 
   2   1  -1    5.17    0.50 
   2   1  -1    4.57    0.49 
   2   1  -1    5.30    0.51 
   1  -1  -1    4.03    0.38 
   1  -1  -1    4.57    0.39 
  -1  -1   1    3.60    0.35 
  -1  -1   1    3.97    0.38 
  -1  -1   1    3.96    0.35 
   1  -1  -1    4.27    0.38 
   1  -1  -1    4.53    0.36 
   1  -1  -1    4.28    0.37 
   1   1  -1    4.84    0.38 
  -1   1   1    3.99    0.38 
   1   1  -1    4.12    0.36 
   1   1  -1    4.82    0.38 
   1   1  -1    3.54    0.35 
   0  -1  -1    0.05    0.04 
   0   1   1   -0.01    0.04 
   0   1  -1   -0.02    0.04 
  -1  -1  -1    6.14    0.57 
   1  -1   1    7.35    0.60 
   1  -1   1    7.34    0.58 
   1  -1   1    6.49    0.58 
   1  -1   1    6.68    0.57 
   1  -1   1    6.19    0.56 
   1   1   1    6.12    0.58 
   1   1   1    7.31    0.58 
  -1   1  -1    7.41    0.59 
   1   1   1    6.08    0.57 
  -2  -1  -1    2.03    0.23 
   2  -1   1    2.03    0.21 
   2  -1   1    1.84    0.25 
   2  -1   1    1.91    0.25 
   2  -1   1    2.17    0.22 
   2  -1   1    1.80    0.25 
   2   1   1    2.05    0.24 
   2   1   1    1.99    0.23 
   2   1   1    2.08    0.22 
   2   1   1    1.79    0.26 
   3  -1   1    1.13    0.26 
   3  -1   1    1.58    0.26 
  -3  -1  -1    1.36    0.23 
   3  -1   1    1.20    0.21 
   3  -1   1    1.62    0.27 
   3  -1   1    1.92    0.26 
   3  -1   1    1.72    0.21 
   3   1   1    1.26    0.22 
   3   1   1    1.80    0.28 
   3   1   1    1.27    0.24 
   3   1   1    1.40    0.25 
   4  -1   1  298.11   23.61 
   4  -1   1  266.88   23.60 
  -4  -1  -1  278.62   23.61 
   4  -1   1  284.97   23.61 
   4  -1   1  254.85   23.61 
   4  -1   1  309.87   23.61 
   4  -1   1  270.21   23.60 
   4   1   1  308.22   23.61 
   4   1   1  266.84   23.61 
  -4   1  -1  280.73   23.61 
   4   1   1  267.18   23.60 
   4   1   1  296.50   23.62 
   5  -1   1    8.52    0.80 
   5  -1   1    9.60    0.86 
   5  -1   1    8.44    0.82 
   5  -1   1    9.31    0.87 
  -5  -1  -1    8.50    0.83 
   5  -1   1    9.94    0.86 
   5   1   1    8.15    0.84 
   5   1   1    7.77    0.81 
   5   1   1    9.45    0.89 
  -5   1  -1    9.13    0.84 
   5   1   1    8.82    0.85 
  -6  -1  -1    1.17    0.30 
   6  -1   1    0.34    0.29 
   6  -1   1    0.60    0.22 
   6  -1   1    0.92    0.24 
  -6  -1  -1    0.56    0.25 
   6  -1   1    0.52    0.30 
   6   1   1    0.51    0.32 
   6   1   1    0.77    0.28 
   6   1   1    0.69    0.25 
   6   1   1    0.87    0.23 
  -6   1  -1    0.33    0.25 
   7  -1   1   12.42    1.18 
   7  -1   1   11.84    1.12 
  -7  -1  -1   12.35    1.18 
   7  -1   1   12.96    1.14 
  -7  -1  -1   12.99    1.14 
   7  -1   1   11.42    1.17 
   7   1   1   11.82    1.19 
  -7   1  -1   12.71    1.15 
   7   1   1   12.92    1.15 
   7   1   1   12.74    1.13 
   7   1   1   12.63    1.17 
   8  -1   1   38.44    3.29 
   8  -1   1   39.26    3.28 
  -8  -1  -1   38.02    3.28 
   8  -1   1   36.99    3.25 
   8  -1   1   37.12    3.24 
  -8  -1  -1   40.54    3.26 
  -8   1  -1   38.07    3.26 
   8   1   1   38.04    3.27 
   8   1   1   39.10    3.26 
   8   1   1   37.12    3.29 
   8   1   1   36.63    3.25 
   9  -1   1    0.74    0.39 
  -9  -1  -1    0.79    0.32 
   9  -1   1    1.24    0.29 
   9  -1   1    0.69    0.40 
   9  -1   1    0.75    0.30 
  -9  -1  -1    1.22    0.39 
   9   1   1    1.09    0.32 
   9   1   1    0.55    0.38 
   9   1   1    0.60    0.30 
  -9   1  -1    0.96    0.34 
   9   1   1    0.51    0.41 
 -10  -1  -1   23.64    2.10 
  10  -1   1   21.17    2.10 
  10  -1   1   23.21    2.04 
 -10  -1  -1   24.43    2.04 
  10  -1   1   22.73    2.08 
  10  -1   1   22.24    2.01 
 -10   1  -1   22.61    2.06 
  10   1   1   21.47    2.09 
 -10   1  -1   23.97    2.05 
  10   1   1   24.42    2.03 
  10   1   1   25.21    2.05 
  10   1   1   19.98    2.06 
  11  -1   1   -0.18    0.47 
  11  -1   1    0.64    0.38 
  11  -1   1    0.46    0.33 
  11  -1   1   -0.23    0.46 
 -11  -1  -1    0.39    0.44 
 -11  -1  -1   -0.24    0.34 
  11   1   1    0.14    0.46 
 -11   1  -1    0.27    0.37 
  11   1   1    0.00    0.36 
  11   1   1   -0.18    0.34 
 -11   1  -1   -0.45    0.42 
  11   1   1    0.12    0.49 
  12  -1   1    1.43    0.43 
  12  -1   1    1.60    0.40 
 -12  -1  -1    1.08    0.42 
 -12  -1  -1    0.56    0.52 
  12  -1   1    1.12    0.53 
  12  -1   1    1.66    0.58 
  12   1   1    0.92    0.41 
  12   1   1    1.22    0.42 
  12   1   1    1.40    0.57 
 -12   1  -1    0.18    0.47 
  12   1   1    1.13    0.52 
 -12   1  -1    0.75    0.41 
  13  -1   1    0.38    0.43 
  13  -1   1    0.56    0.59 
 -13  -1  -1   -0.08    0.43 
 -13  -1  -1    0.21    0.50 
  13  -1   1    0.02    0.57 
  13  -1   1    0.10    0.39 
  13   1   1    0.27    0.45 
  13   1   1    0.16    0.61 
 -13   1  -1    0.23    0.42 
 -13   1  -1    1.21    0.54 
  13   1   1    0.89    0.42 
  13   1   1   -0.64    0.54 
  14  -1   1    2.73    0.72 
 -14  -1  -1    2.82    0.67 
  14  -1   1    3.18    0.56 
 -14  -1  -1    2.47    0.57 
  14   1   1    3.18    0.76 
  14   1   1    3.93    0.57 
  14   1   1    3.56    0.60 
 -14   1  -1    3.10    0.65 
 -14   1  -1    3.22    0.59 
 -15  -1  -1    1.09    0.62 
  15  -1   1    1.53    0.54 
  15  -1   1   -1.09    0.67 
  15   1   1    0.07    0.51 
  15   1   1    0.33    0.70 
  15   1   1   -0.20    0.47 
 -15   1  -1    0.74    0.60 
 -15   1  -1    0.41    0.49 
 -16  -1  -1    0.54    0.67 
  16  -1   1    0.59    0.72 
  16   1   1    0.47    0.74 
 -16   1  -1    0.12    0.61 
 -17  -1  -1    0.25    0.70 
  17  -1   1   -1.53    0.78 
 -17   1  -1    0.05    0.61 
  17   1   1   -0.22    0.78 
 -17  -2   1    1.42    0.71 
  17  -2  -1    1.07    0.82 
 -17   2   1    1.10    0.69 
  17   2  -1    1.34    0.85 
 -16  -2   1    0.57    0.63 
  16  -2  -1    0.09    0.73 
 -16   2   1    0.17    0.56 
  16   2  -1   -0.65    0.52 
  16   2  -1    1.51    0.75 
  15  -2  -1    3.61    0.81 
 -15  -2   1    2.89    0.72 
  15  -2  -1    3.82    0.61 
  15   2  -1    1.64    0.82 
 -15   2   1    2.98    0.63 
  15   2  -1    3.43    0.66 
 -15   2   1    3.49    0.70 
  15   2  -1    4.49    0.65 
  14  -2  -1    2.18    0.71 
  14  -2  -1    2.80    0.53 
 -14  -2   1    2.93    0.65 
  14  -2  -1    1.67    0.74 
 -14   2   1    2.48    0.54 
  14   2  -1    3.79    0.61 
 -14   2   1    0.76    0.59 
 -14   2   1    3.25    0.61 
  14   2  -1    3.49    0.57 
  14   2  -1    0.77    0.71 
 -13  -2   1    7.33    0.85 
  13  -2  -1    7.67    0.97 
  13  -2  -1    8.84    0.85 
 -13  -2   1    7.13    0.93 
  13  -2  -1    7.12    0.99 
  13   2  -1    7.16    0.96 
  13   2  -1    7.04    0.99 
  13   2  -1    8.81    0.90 
 -13   2   1    8.71    0.89 
  13   2  -1    7.79    0.87 
 -13   2   1    7.20    0.91 
  12  -2  -1    2.05    0.60 
 -12  -2   1    1.36    0.52 
  12  -2  -1    1.77    0.58 
 -12  -2   1    1.03    0.43 
  12  -2  -1    2.54    0.45 
  12   2  -1    1.50    0.48 
  12   2  -1    2.12    0.47 
  12   2  -1    1.65    0.58 
 -12   2   1    2.12    0.50 
 -12   2   1    1.28    0.44 
  12   2  -1    2.04    0.60 
  11  -2  -1    1.65    0.51 
  11  -2  -1    1.65    0.38 
 -11  -2   1    1.24    0.38 
 -11  -2   1    1.46    0.47 
  11  -2  -1    1.79    0.55 
  11   2  -1    0.86    0.39 
 -11   2   1    1.09    0.45 
 -11   2   1    0.85    0.40 
  11   2  -1    0.94    0.51 
  11   2  -1    0.52    0.50 
  11   2  -1    1.48    0.43 
 -10  -2   1   -0.36    0.30 
  10  -2  -1   -0.15    0.32 
  10  -2  -1    0.16    0.43 
  10  -2  -1    0.02    0.30 
  10  -2  -1   -0.07    0.41 
 -10  -2   1   -0.23    0.41 
 -10   2   1    0.12    0.35 
  10   2  -1    0.34    0.44 
  10   2  -1   -0.23    0.35 
 -10   2   1   -0.19    0.32 
  10   2  -1    0.21    0.45 
  10   2  -1   -0.10    0.33 
   9  -2  -1   -0.10    0.38 
   9  -2  -1    0.04    0.27 
  -9  -2   1   -0.26    0.27 
  -9  -2   1    0.43    0.36 
   9  -2  -1   -0.39    0.29 
   9  -2  -1   -0.44    0.39 
   9   2  -1    0.72    0.43 
   9   2  -1    0.20    0.30 
   9   2  -1   -0.12    0.31 
  -9   2   1    0.08    0.31 
   9   2  -1   -0.61    0.37 
  -9   2   1    0.39    0.31 
   8  -2  -1    2.01    0.41 
   8  -2  -1    1.97    0.34 
   8  -2  -1    1.82    0.32 
   8  -2  -1    2.58    0.41 
  -8  -2   1    1.59    0.39 
  -8  -2   1    1.41    0.32 
   8  -2  -1    1.89    0.37 
   8  -2  -1    1.66    0.41 
   8   2  -1    1.12    0.43 
   8   2  -1    1.70    0.33 
   8   2  -1    1.80    0.34 
  -8   2   1    1.05    0.34 
   8   2  -1    1.90    0.41 
   8   2  -1    1.80    0.36 
   7  -2  -1    6.67    0.72 
  -7  -2   1    6.95    0.69 
   7  -2  -1    6.94    0.71 
   7  -2  -1    7.44    0.72 
   7  -2  -1    7.12    0.69 
   7  -2  -1    6.50    0.69 
  -7  -2   1    7.28    0.76 
   7  -2  -1    6.87    0.69 
   7   2  -1    6.88    0.78 
   7   2  -1    6.92    0.71 
  -7   2   1    6.95    0.70 
   7   2  -1    6.35    0.72 
   7   2  -1    7.22    0.72 
   7   2  -1    5.60    0.70 
   6  -2  -1    0.52    0.22 
   6  -2  -1    0.85    0.28 
   6  -2  -1    0.32    0.26 
   6  -2  -1    0.27    0.32 
   6  -2  -1    0.29    0.24 
  -6  -2   1    0.42    0.23 
   6  -2  -1    0.09    0.30 
  -6  -2   1    0.08    0.29 
   6   2  -1    0.53    0.26 
   6   2  -1    0.62    0.24 
   6   2  -1    0.52    0.25 
   6   2  -1    0.61    0.30 
   6   2  -1    0.82    0.32 
   5  -2  -1    7.88    0.81 
   5  -2  -1    8.18    0.76 
  -5  -2   1    8.25    0.79 
   5  -2  -1    7.10    0.74 
  -5  -2   1    8.09    0.74 
   5  -2  -1    7.82    0.78 
   5  -2  -1    8.98    0.81 
   5  -2  -1    7.77    0.77 
   5   2  -1    7.74    0.77 
   5   2  -1    7.81    0.79 
   5   2  -1    7.82    0.83 
   5   2  -1    7.13    0.74 
   5   2  -1    7.96    0.76 
   4  -2  -1   39.52    3.44 
  -4  -2   1   42.44    3.45 
   4  -2  -1   39.88    3.43 
  -4  -2   1   41.16    3.42 
   4  -2  -1   38.73    3.45 
   4  -2  -1   40.83    3.44 
   4  -2  -1   41.65    3.43 
   4  -2  -1   40.47    3.44 
   4   2  -1   39.78    3.44 
   4   2  -1   40.79    3.44 
   4   2  -1   41.42    3.43 
   4   2  -1   40.97    3.45 
   4   2  -1   39.73    3.42 
   3  -2  -1    1.82    0.27 
  -3  -2   1    1.72    0.23 
   3  -2  -1    1.76    0.25 
  -3  -2   1    2.30    0.30 
   3  -2  -1    2.58    0.32 
   3  -2  -1    1.69    0.27 
   3  -2  -1    1.65    0.31 
   3   2  -1    2.13    0.31 
   3   2  -1    1.40    0.27 
   3   2  -1    2.39    0.29 
   3   2  -1    1.44    0.26 
   3   2  -1    1.63    0.23 
   2  -2  -1    5.20    0.46 
   2  -2  -1    4.21    0.49 
  -2  -2   1    5.01    0.49 
   2  -2  -1    4.71    0.45 
  -2  -2   1    4.60    0.43 
   2  -2  -1    5.23    0.50 
   2  -2  -1    4.76    0.47 
   2   2  -1    4.91    0.50 
   2   2  -1    4.56    0.49 
   2   2  -1    4.17    0.42 
   2   2  -1    4.49    0.47 
   2   2  -1    4.67    0.44 
   2   2  -1    4.19    0.46 
   1  -2  -1   15.08    1.26 
   1  -2  -1   16.35    1.28 
   1  -2  -1   14.30    1.27 
  -1  -2   1   15.26    1.27 
  -1  -2   1   15.24    1.25 
   1  -2  -1   15.44    1.27 
  -1  -2   1   13.27    1.25 
   1   2  -1   14.69    1.26 
   1   2  -1   13.63    1.25 
   1   2  -1   14.34    1.26 
   1   2  -1   14.91    1.25 
  -1   2   1   16.36    1.27 
   1   2  -1   15.49    1.27 
   0  -2  -1  295.82   28.00 
   0  -2   1  331.92   28.01 
   0  -2   1  336.91   28.00 
   0  -2  -1  379.70   28.02 
   0  -2  -1  328.28   28.01 
   0   2   1  333.78   28.01 
   0   2  -1  329.43   28.00 
   0   2  -1  318.02   28.00 
   0   2  -1  357.35   28.01 
   1  -2   1    0.09    0.11 
  -1  -2  -1    0.41    0.10 
   1  -2   1    0.38    0.11 
  -1  -2  -1    0.09    0.13 
   1   2   1    0.22    0.13 
   1   2   1    0.22    0.14 
   1   2   1    0.21    0.12 
   1   2   1    0.20    0.12 
  -1   2  -1    0.19    0.16 
   1   2   1    0.36    0.11 
   2  -2   1    5.07    0.56 
  -2  -2  -1    5.86    0.57 
   2  -2   1    6.24    0.55 
  -2  -2  -1    5.86    0.53 
   2  -2   1    5.80    0.51 
  -2  -2  -1    5.16    0.51 
   2  -2   1    5.33    0.51 
   2  -2   1    5.83    0.57 
  -2   2  -1    6.06    0.56 
   2   2   1    6.28    0.54 
   2   2   1    5.30    0.55 
   2   2   1    5.07    0.53 
   2   2   1    5.64    0.57 
   3  -2   1   41.43    3.58 
   3  -2   1   41.18    3.58 
  -3  -2  -1   44.70    3.60 
   3  -2   1   41.06    3.60 
   3  -2   1   44.20    3.60 
   3  -2   1   44.17    3.60 
   3  -2   1   40.22    3.60 
  -3  -2  -1   42.10    3.59 
   3   2   1   41.49    3.59 
   3   2   1   44.18    3.60 
   3   2   1   45.08    3.59 
   3   2   1   41.00    3.58 
   4  -2   1  124.54   10.14 
   4  -2   1  111.34   10.14 
  -4  -2  -1  122.36   10.13 
   4  -2   1  118.10   10.13 
   4  -2   1  117.08   10.13 
   4  -2   1  121.02   10.14 
   4  -2   1  124.49   10.14 
   4   2   1  124.41   10.15 
   4   2   1  119.08   10.13 
   4   2   1  127.13   10.14 
   4   2   1  119.36   10.14 
   5  -2   1    8.06    0.83 
   5  -2   1    9.00    0.84 
   5  -2   1    7.79    0.79 
   5  -2   1    8.55    0.86 
   5  -2   1   10.72    0.85 
  -5  -2  -1    9.60    0.85 
   5  -2   1    7.75    0.78 
  -5  -2  -1    8.70    0.80 
   5   2   1    9.27    0.83 
   5   2   1    9.11    0.86 
   5   2   1    7.26    0.79 
   5   2   1    7.64    0.81 
   6  -2   1   29.56    2.73 
   6  -2   1   30.78    2.73 
   6  -2   1   33.73    2.71 
  -6  -2  -1   31.79    2.74 
   6  -2   1   30.38    2.73 
  -6  -2  -1   32.68    2.71 
   6  -2   1   31.60    2.70 
   6   2   1   33.33    2.72 
   6   2   1   31.58    2.71 
   6   2   1   30.72    2.72 
  -6   2  -1   33.13    2.72 
   6   2   1   31.59    2.74 
  -7  -2  -1    1.05    0.27 
   7  -2   1    1.27    0.25 
  -7  -2  -1    0.41    0.34 
   7  -2   1    1.21    0.26 
   7  -2   1    1.75    0.33 
   7  -2   1    1.24    0.35 
   7  -2   1    1.01    0.34 
   7   2   1    0.76    0.36 
   7   2   1    0.94    0.26 
   7   2   1    1.05    0.33 
  -7   2  -1    0.94    0.31 
   7   2   1    0.64    0.28 
  -8  -2  -1    0.87    0.36 
   8  -2   1    0.43    0.37 
   8  -2   1    1.45    0.28 
   8  -2   1    0.68    0.37 
   8  -2   1    1.41    0.30 
  -8  -2  -1    1.39    0.30 
   8   2   1    1.37    0.32 
   8   2   1    0.38    0.40 
   8   2   1    0.27    0.33 
   8   2   1    0.91    0.29 
  -8   2  -1    1.29    0.33 
  -9  -2  -1    6.30    0.72 
   9  -2   1    5.48    0.71 
   9  -2   1    6.70    0.66 
  -9  -2  -1    6.18    0.65 
   9  -2   1    6.06    0.63 
   9  -2   1    5.34    0.71 
   9   2   1    6.63    0.71 
   9   2   1    6.46    0.75 
   9   2   1    5.17    0.64 
   9   2   1    6.38    0.67 
  -9   2  -1    6.46    0.67 
  10  -2   1   19.09    1.55 
 -10  -2  -1   14.88    1.63 
  10  -2   1   17.93    1.53 
  10  -2   1   15.12    1.63 
  10  -2   1   17.05    1.61 
 -10  -2  -1   17.55    1.56 
  10   2   1   17.65    1.55 
  10   2   1   15.00    1.58 
 -10   2  -1   18.14    1.56 
  10   2   1   19.35    1.57 
  10   2   1   14.20    1.63 
 -11  -2  -1    6.48    0.83 
  11  -2   1    7.96    0.76 
  11  -2   1    7.64    0.74 
  11  -2   1    4.88    0.82 
  11  -2   1    6.05    0.83 
 -11  -2  -1    7.51    0.76 
  11   2   1    7.59    0.76 
  11   2   1    6.35    0.76 
  11   2   1    6.51    0.85 
  11   2   1    5.60    0.80 
 -11   2  -1    8.06    0.79 
 -11   2  -1    7.50    0.82 
 -12  -2  -1    1.90    0.57 
  12  -2   1    3.21    0.61 
  12  -2   1    2.40    0.46 
  12  -2   1    2.33    0.47 
  12  -2   1    2.52    0.63 
 -12  -2  -1    2.93    0.49 
  12   2   1    3.09    0.65 
 -12   2  -1    1.58    0.52 
  12   2   1    3.13    0.58 
 -12   2  -1    2.09    0.49 
  12   2   1    2.15    0.47 
  12   2   1    2.26    0.51 
  13  -2   1    0.07    0.58 
 -13  -2  -1   -0.61    0.40 
  13  -2   1    0.53    0.55 
 -13  -2  -1    0.98    0.53 
  13  -2   1    0.96    0.40 
  13   2   1    0.87    0.48 
  13   2   1   -0.16    0.42 
 -13   2  -1   -0.12    0.49 
 -13   2  -1   -0.07    0.43 
  13   2   1    0.83    0.60 
 -13   2  -1   -0.28    0.48 
 -14  -2  -1    1.00    0.62 
  14  -2   1    0.64    0.44 
 -14  -2  -1    0.47    0.47 
  14  -2   1    0.60    0.66 
  14   2   1    1.90    0.71 
 -14   2  -1    1.76    0.50 
 -14   2  -1    1.14    0.57 
  14   2   1    1.73    0.49 
  14   2   1    0.37    0.49 
  15  -2   1    0.24    0.69 
 -15  -2  -1    0.90    0.62 
  15   2   1    0.19    0.72 
  15   2   1    0.06    0.47 
 -15   2  -1    1.42    0.57 
 -15   2  -1    0.19    0.48 
  15   2   1   -0.47    0.48 
 -16  -2  -1    3.34    0.78 
  16  -2   1    2.53    0.80 
 -16   2  -1    2.77    0.71 
  16   2   1    4.13    0.88 
  16   2   1    2.33    0.65 
 -17  -2  -1    0.98    0.72 
  17  -2   1   -0.27    0.81 
 -17   2  -1    0.95    0.67 
  17   2   1   -0.50    0.82 
  16  -3  -1    0.54    0.74 
 -16  -3   1    2.10    0.69 
  16   3  -1    1.93    0.57 
 -16   3   1    0.80    0.60 
  16   3  -1    0.22    0.55 
  16   3  -1    0.59    0.76 
  15  -3  -1    1.15    0.71 
  15  -3  -1    0.13    0.46 
 -15  -3   1    1.53    0.64 
  15   3  -1   -0.02    0.68 
  15   3  -1    1.32    0.57 
 -15   3   1    0.22    0.56 
 -15   3   1    1.02    0.50 
  15   3  -1    0.20    0.51 
  14  -3  -1    0.46    0.61 
  14  -3  -1    0.65    0.44 
 -14  -3   1    0.27    0.61 
  14  -3  -1    0.99    0.66 
  14   3  -1    0.86    0.49 
 -14   3   1    0.93    0.49 
  14   3  -1    0.51    0.69 
  14   3  -1    0.71    0.50 
 -14   3   1    0.79    0.54 
 -14   3   1    0.52    0.57 
  13  -3  -1    0.21    0.40 
 -13  -3   1    0.07    0.56 
  13  -3  -1    0.81    0.63 
  13  -3  -1    1.60    0.58 
 -13  -3   1   -0.55    0.40 
  13   3  -1    0.64    0.46 
 -13   3   1    0.61    0.50 
 -13   3   1    1.33    0.45 
  13   3  -1   -0.22    0.59 
  13   3  -1    0.23    0.45 
 -13   3   1   -0.22    0.51 
  13   3  -1    0.95    0.58 
 -12  -3   1    3.23    0.61 
  12  -3  -1    3.69    0.51 
  12  -3  -1    3.27    0.63 
  12  -3  -1    3.40    0.69 
 -12  -3   1    2.51    0.50 
  12   3  -1    3.31    0.55 
 -12   3   1    3.52    0.54 
  12   3  -1    3.05    0.53 
  12   3  -1    3.08    0.67 
 -12   3   1    3.29    0.56 
  12   3  -1    2.31    0.63 
  11  -3  -1   38.17    3.37 
 -11  -3   1   38.12    3.37 
  11  -3  -1   37.20    3.38 
 -11  -3   1   40.57    3.31 
  11  -3  -1   37.28    3.31 
  11   3  -1   39.86    3.34 
  11   3  -1   40.16    3.32 
 -11   3   1   40.10    3.33 
  11   3  -1   35.99    3.37 
 -11   3   1   36.03    3.33 
  11   3  -1   38.62    3.37 
 -10  -3   1    2.44    0.41 
  10  -3  -1    3.10    0.55 
  10  -3  -1    2.21    0.49 
  10  -3  -1    2.15    0.40 
 -10  -3   1    1.97    0.52 
  10   3  -1    1.97    0.55 
  10   3  -1    2.95    0.44 
  10   3  -1    2.57    0.52 
  10   3  -1    3.17    0.48 
 -10   3   1    2.66    0.44 
  -9  -3   1    3.68    0.52 
   9  -3  -1    3.08    0.43 
   9  -3  -1    3.48    0.52 
   9  -3  -1    3.06    0.48 
   9  -3  -1    2.56    0.54 
  -9  -3   1    2.82    0.43 
   9   3  -1    3.47    0.46 
   9   3  -1    3.45    0.55 
  -9   3   1    3.02    0.46 
   9   3  -1    3.84    0.53 
   9   3  -1    2.72    0.47 
  -8  -3   1    0.38    0.36 
   8  -3  -1    0.49    0.34 
  -8  -3   1   -0.37    0.25 
   8  -3  -1    0.06    0.31 
   8  -3  -1   -0.06    0.25 
   8  -3  -1   -0.18    0.38 
   8  -3  -1   -0.18    0.34 
   8   3  -1    0.07    0.31 
  -8   3   1    0.17    0.28 
   8   3  -1    0.72    0.35 
   8   3  -1    0.85    0.38 
   8   3  -1   -0.04    0.27 
   7  -3  -1    2.22    0.34 
   7  -3  -1    1.38    0.28 
   7  -3  -1    0.40    0.35 
   7  -3  -1    1.71    0.37 
  -7  -3   1    1.09    0.27 
  -7  -3   1    1.45    0.37 
   7  -3  -1    1.59    0.34 
   7   3  -1    1.61    0.28 
   7   3  -1    1.55    0.30 
   7   3  -1    1.53    0.33 
   7   3  -1    0.87    0.37 
   7   3  -1    1.30    0.35 
  -6  -3   1    6.03    0.63 
   6  -3  -1    6.09    0.65 
   6  -3  -1    6.45    0.60 
   6  -3  -1    5.96    0.65 
   6  -3  -1    5.38    0.63 
   6  -3  -1    6.37    0.67 
  -6  -3   1    5.58    0.60 
   6   3  -1    5.61    0.61 
   6   3  -1    5.52    0.62 
   6   3  -1    5.38    0.61 
   6   3  -1    5.51    0.60 
   6   3  -1    5.79    0.64 
   5  -3  -1    0.02    0.24 
  -5  -3   1   -0.12    0.19 
  -5  -3   1    0.27    0.29 
   5  -3  -1    0.79    0.30 
   5  -3  -1    0.97    0.31 
   5  -3  -1    0.88    0.22 
   5  -3  -1    0.10    0.26 
   5   3  -1    0.56    0.24 
   5   3  -1    0.19    0.24 
   5   3  -1    0.27    0.20 
   5   3  -1    0.65    0.29 
   5   3  -1    0.90    0.31 
   4  -3  -1   11.62    1.06 
   4  -3  -1   12.28    1.01 
  -4  -3   1   12.33    1.06 
   4  -3  -1   11.25    1.03 
   4  -3  -1   10.56    1.06 
  -4  -3   1   10.70    1.00 
   4  -3  -1   10.31    1.04 
   4   3  -1   11.68    1.05 
   4   3  -1   10.68    0.99 
   4   3  -1   11.98    1.07 
   4   3  -1   11.81    1.03 
   4   3  -1   11.59    1.04 
   3  -3  -1    4.21    0.43 
   3  -3  -1    3.91    0.42 
  -3  -3   1    3.82    0.45 
  -3  -3   1    3.94    0.42 
   3  -3  -1    4.23    0.44 
   3  -3  -1    3.77    0.45 
   3  -3  -1    4.15    0.46 
   3   3  -1    4.02    0.45 
   3   3  -1    3.99    0.40 
   3   3  -1    4.15    0.43 
   3   3  -1    3.97    0.45 
   3   3  -1    4.62    0.46 
   2  -3  -1    0.74    0.18 
  -2  -3   1    0.46    0.09 
  -2  -3   1    0.78    0.14 
   2  -3  -1    0.87    0.25 
   2  -3  -1    0.80    0.21 
   2  -3  -1    1.07    0.23 
  -2  -3   1    1.08    0.24 
  -2   3   1    0.72    0.24 
   2   3  -1    0.65    0.22 
   2   3  -1    0.39    0.09 
   2   3  -1    0.33    0.19 
   2   3  -1    0.37    0.20 
   2   3  -1    0.47    0.14 
   1  -3  -1   15.91    1.27 
   1  -3  -1   14.34    1.28 
   1  -3  -1   16.18    1.29 
   1  -3  -1   13.93    1.29 
  -1  -3   1   14.79    1.26 
   1   3  -1   14.97    1.26 
  -1   3   1   13.53    1.26 
   1   3  -1   15.67    1.29 
   1   3  -1   14.25    1.27 
  -1   3   1   15.41    1.29 
   0  -3  -1   12.45    1.09 
   0  -3  -1   13.19    1.12 
   0  -3   1   13.67    1.10 
   0  -3  -1   12.96    1.11 
   0   3  -1   11.80    1.09 
   0   3  -1   12.76    1.10 
   0   3   1   11.88    1.12 
   0   3   1   12.27    1.10 
   0   3   1   14.80    1.13 
   1  -3   1   52.41    4.05 
  -1  -3  -1   50.19    4.04 
  -1  -3  -1   45.65    4.03 
  -1  -3  -1   52.84    4.05 
   1  -3   1   51.17    4.05 
   1   3   1   45.16    4.05 
   1   3   1   50.29    4.04 
   1   3   1   47.98    4.05 
   1   3   1   42.07    4.03 
  -1   3  -1   44.63    4.03 
   2  -3   1    7.05    0.65 
   2  -3   1    6.63    0.61 
   2  -3   1    6.41    0.63 
  -2  -3  -1    5.95    0.64 
   2  -3   1    5.40    0.64 
  -2  -3  -1    6.76    0.60 
   2   3   1    6.17    0.61 
   2   3   1    6.90    0.65 
   2   3   1    6.28    0.63 
   2   3   1    6.63    0.61 
  -2   3  -1    6.74    0.65 
   3  -3   1    0.46    0.17 
   3  -3   1    0.23    0.27 
   3  -3   1    0.37    0.26 
  -3  -3  -1    0.27    0.18 
  -3  -3  -1    0.47    0.25 
   3  -3   1    0.27    0.22 
   3  -3   1    0.43    0.22 
  -3   3  -1    0.90    0.25 
   3   3   1    0.09    0.20 
   3   3   1    0.14    0.26 
   3   3   1    0.41    0.23 
   3   3   1    0.37    0.22 
   4  -3   1    2.88    0.31 
  -4  -3  -1    2.86    0.39 
   4  -3   1    2.69    0.37 
   4  -3   1    2.83    0.39 
   4  -3   1    2.73    0.39 
   4  -3   1    3.01    0.31 
  -4  -3  -1    2.78    0.32 
   4  -3   1    2.74    0.36 
   4   3   1    2.09    0.39 
   4   3   1    2.82    0.36 
   4   3   1    2.62    0.35 
   4   3   1    2.65    0.33 
  -4   3  -1    2.35    0.37 
  -5  -3  -1   92.17    7.45 
   5  -3   1   89.78    7.44 
   5  -3   1   85.75    7.44 
  -5  -3  -1   89.11    7.42 
   5  -3   1   86.13    7.44 
   5  -3   1   88.20    7.42 
   5  -3   1   88.05    7.42 
   5  -3   1   90.05    7.44 
   5   3   1   86.58    7.42 
   5   3   1   88.38    7.43 
   5   3   1   86.63    7.43 
   5   3   1   89.15    7.44 
   6  -3   1    7.87    0.72 
   6  -3   1    7.81    0.81 
  -6  -3  -1    7.53    0.81 
   6  -3   1    7.38    0.81 
   6  -3   1    7.88    0.80 
   6  -3   1    7.18    0.73 
  -6  -3  -1    7.84    0.74 
   6   3   1    7.08    0.78 
   6   3   1    8.56    0.78 
   6   3   1    7.27    0.76 
   6   3   1    7.65    0.74 
   7  -3   1   17.68    1.65 
   7  -3   1   18.16    1.60 
   7  -3   1   18.27    1.65 
  -7  -3  -1   17.61    1.61 
   7  -3   1   18.52    1.66 
   7  -3   1   19.30    1.61 
  -7  -3  -1   18.37    1.66 
   7   3   1   17.18    1.64 
   7   3   1   18.08    1.68 
  -7   3  -1   18.56    1.64 
   7   3   1   19.42    1.63 
   7   3   1   19.26    1.62 
   8  -3   1    1.78    0.38 
   8  -3   1    1.94    0.41 
  -8  -3  -1    1.60    0.41 
   8  -3   1    0.96    0.38 
   8  -3   1    1.62    0.30 
  -8  -3  -1    2.05    0.32 
   8  -3   1    1.96    0.31 
   8   3   1    1.81    0.38 
   8   3   1    1.40    0.31 
   8   3   1    2.35    0.37 
   8   3   1    1.17    0.43 
  -8   3  -1    0.72    0.36 
   9  -3   1    5.94    0.61 
   9  -3   1    4.67    0.65 
   9  -3   1    4.66    0.63 
  -9  -3  -1    3.69    0.64 
  -9  -3  -1    5.76    0.58 
   9  -3   1    5.35    0.56 
   9   3   1    4.16    0.61 
   9   3   1    5.62    0.58 
   9   3   1    6.18    0.62 
  -9   3  -1    5.94    0.62 
   9   3   1    4.27    0.66 
  10  -3   1    0.36    0.45 
 -10  -3  -1   -1.27    0.41 
 -10  -3  -1   -0.62    0.30 
  10  -3   1   -0.13    0.29 
  10  -3   1    0.06    0.42 
  10  -3   1    0.00    0.32 
 -10   3  -1    0.45    0.36 
  10   3   1    0.43    0.42 
  10   3   1   -0.26    0.30 
  10   3   1   -1.17    0.45 
  10   3   1    0.36    0.35 
 -11  -3  -1    0.68    0.37 
  11  -3   1    1.63    0.54 
  11  -3   1    0.50    0.50 
  11  -3   1    1.33    0.35 
 -11  -3  -1    1.37    0.49 
  11   3   1    1.34    0.50 
 -11   3  -1    0.74    0.42 
 -11   3  -1    1.59    0.42 
  11   3   1    0.42    0.36 
  11   3   1    1.06    0.43 
  11   3   1    0.60    0.54 
  12  -3   1    1.58    0.56 
 -12  -3  -1    1.23    0.56 
  12  -3   1    2.27    0.43 
  12  -3   1    2.64    0.62 
 -12  -3  -1    1.95    0.46 
 -12   3  -1    2.24    0.52 
 -12   3  -1    2.68    0.49 
  12   3   1    1.36    0.56 
  12   3   1    2.14    0.61 
 -12   3  -1    1.98    0.52 
  12   3   1    2.21    0.51 
  12   3   1    2.52    0.47 
 -13  -3  -1   -0.27    0.41 
  13  -3   1   -0.32    0.58 
  13  -3   1    0.12    0.55 
  13  -3   1   -0.12    0.38 
 -13  -3  -1    0.39    0.54 
 -13   3  -1    0.24    0.49 
  13   3   1    0.90    0.48 
 -13   3  -1    0.28    0.44 
  13   3   1    0.45    0.61 
  13   3   1    0.20    0.43 
 -13   3  -1   -1.14    0.44 
  14  -3   1    0.93    0.66 
 -14  -3  -1    1.22    0.62 
  14  -3   1    1.70    0.47 
  14   3   1    2.09    0.72 
  14   3   1    1.50    0.56 
 -14   3  -1    1.59    0.57 
 -14   3  -1    1.86    0.51 
  14   3   1    1.54    0.51 
 -15  -3  -1    0.52    0.63 
  15  -3   1    0.01    0.67 
  15   3   1    0.18    0.55 
 -15   3  -1    0.40    0.56 
  15   3   1   -0.51    0.48 
  15   3   1   -0.61    0.74 
 -15   3  -1    0.31    0.50 
  16  -3   1    0.67    0.73 
 -16  -3  -1    2.10    0.71 
  16   3   1    0.63    0.58 
 -16   3  -1    0.77    0.62 
  16   3   1    0.66    0.77 
  16   3   1    0.40    0.57 
 -16  -4   1    1.39    0.69 
  16  -4  -1   -1.12    0.71 
 -16   4   1   -0.13    0.57 
  16   4  -1    0.74    0.57 
  16   4  -1    0.14    0.54 
  16   4  -1    0.55    0.78 
 -15  -4   1    2.66    0.69 
  15  -4  -1    1.34    0.73 
  15   4  -1    2.44    0.61 
 -15   4   1    2.59    0.63 
  15   4  -1    1.36    0.75 
  15   4  -1    1.44    0.57 
 -15   4   1    1.57    0.55 
 -14  -4   1    1.27    0.62 
  14  -4  -1    0.90    0.70 
  14  -4  -1    0.66    0.63 
  14  -4  -1    1.01    0.45 
 -14   4   1    1.15    0.49 
  14   4  -1    0.29    0.49 
 -14   4   1   -0.38    0.56 
  14   4  -1    1.25    0.56 
  14   4  -1    1.12    0.66 
 -14   4   1    1.03    0.53 
  13  -4  -1    5.95    0.85 
 -13  -4   1    4.22    0.74 
  13  -4  -1    4.11    0.74 
  13  -4  -1    3.42    0.59 
 -13   4   1    4.96    0.73 
  13   4  -1    4.26    0.81 
  13   4  -1    4.77    0.67 
 -13   4   1    4.06    0.64 
 -13   4   1    4.38    0.67 
  13   4  -1    3.71    0.64 
  13   4  -1    5.16    0.77 
  12  -4  -1    1.63    0.41 
 -12  -4   1    1.27    0.56 
 -12  -4   1    0.89    0.42 
  12  -4  -1    2.33    0.55 
  12  -4  -1    1.36    0.62 
 -12   4   1    0.99    0.54 
  12   4  -1    2.55    0.61 
  12   4  -1    1.74    0.49 
  12   4  -1    1.73    0.62 
 -12   4   1    2.46    0.47 
  12   4  -1    1.83    0.45 
 -12   4   1    1.30    0.48 
 -11  -4   1   -0.36    0.32 
  11  -4  -1   -0.16    0.52 
  11  -4  -1   -0.23    0.46 
  11  -4  -1   -0.16    0.32 
 -11  -4   1    0.52    0.47 
 -11   4   1    0.40    0.40 
  11   4  -1    0.78    0.39 
  11   4  -1    0.33    0.40 
 -11   4   1    0.01    0.37 
  11   4  -1   -0.02    0.51 
 -11   4   1   -0.17    0.44 
  11   4  -1    0.38    0.48 
 -10  -4   1    1.01    0.46 
  10  -4  -1    1.67    0.52 
  10  -4  -1    0.37    0.44 
  10  -4  -1    2.19    0.44 
  10  -4  -1    1.54    0.34 
 -10  -4   1    1.29    0.35 
  10   4  -1    1.15    0.40 
  10   4  -1    1.47    0.39 
  10   4  -1    1.09    0.48 
 -10   4   1    2.04    0.42 
  10   4  -1    1.31    0.53 
   9  -4  -1    1.64    0.45 
  -9  -4   1    0.21    0.38 
   9  -4  -1    0.04    0.27 
   9  -4  -1    0.20    0.38 
   9  -4  -1    0.64    0.36 
  -9  -4   1    0.04    0.28 
   9   4  -1    1.31    0.40 
   9   4  -1    0.47    0.34 
   9   4  -1    1.02    0.46 
   9   4  -1    0.85    0.32 
  -9   4   1    0.50    0.33 
   8  -4  -1    0.89    0.35 
  -8  -4   1    0.79    0.27 
   8  -4  -1    0.26    0.38 
   8  -4  -1    1.52    0.39 
   8  -4  -1    1.06    0.34 
  -8  -4   1    1.23    0.39 
   8  -4  -1    0.56    0.26 
   8   4  -1    0.72    0.33 
   8   4  -1    1.79    0.33 
   8   4  -1    0.80    0.36 
   8   4  -1    0.90    0.42 
  -7  -4   1    0.00    0.32 
   7  -4  -1   -0.21    0.32 
   7  -4  -1    0.14    0.29 
   7  -4  -1    0.54    0.24 
  -7  -4   1    0.23    0.22 
   7  -4  -1   -0.25    0.34 
   7  -4  -1   -0.08    0.29 
   7   4  -1    0.50    0.26 
   7   4  -1    0.63    0.33 
   7   4  -1    0.30    0.22 
   7   4  -1    0.39    0.29 
   7   4  -1    0.24    0.37 
  -6  -4   1   -0.04    0.20 
   6  -4  -1   -0.29    0.27 
   6  -4  -1    0.18    0.27 
   6  -4  -1    0.06    0.22 
   6  -4  -1    0.02    0.32 
  -6  -4   1    0.11    0.30 
   6  -4  -1    0.31    0.31 
   6   4  -1    0.18    0.28 
   6   4  -1    0.07    0.20 
   6   4  -1   -0.40    0.32 
   6   4  -1   -0.10    0.29 
   6   4  -1    0.27    0.24 
  -5  -4   1   30.59    2.53 
  -5  -4   1   30.67    2.57 
   5  -4  -1   28.90    2.55 
   5  -4  -1   30.29    2.57 
   5  -4  -1   28.71    2.55 
   5  -4  -1   28.56    2.57 
   5  -4  -1   30.58    2.54 
   5   4  -1   29.57    2.57 
   5   4  -1   29.80    2.56 
   5   4  -1   29.51    2.56 
   5   4  -1   30.80    2.54 
   5   4  -1   29.06    2.52 
   4  -4  -1    0.95    0.25 
   4  -4  -1    0.62    0.28 
   4  -4  -1   -0.01    0.30 
   4  -4  -1    1.10    0.23 
  -4  -4   1    0.76    0.20 
  -4  -4   1    1.05    0.30 
   4  -4  -1    0.98    0.31 
   4   4  -1    0.48    0.28 
   4   4  -1    1.75    0.26 
  -4   4   1    0.71    0.30 
   4   4  -1    1.23    0.18 
   4   4  -1    0.36    0.31 
   4   4  -1    1.17    0.28 
   3  -4  -1   13.75    1.23 
   3  -4  -1   14.12    1.25 
   3  -4  -1   12.41    1.26 
  -3  -4   1   13.77    1.20 
  -3  -4   1   13.83    1.25 
   3  -4  -1   14.57    1.26 
   3   4  -1   14.37    1.23 
   3   4  -1   12.98    1.24 
  -3   4   1   13.59    1.27 
   3   4  -1   14.99    1.24 
   3   4  -1   14.57    1.18 
   2  -4  -1    0.39    0.25 
   2  -4  -1    0.71    0.28 
   2  -4  -1    0.54    0.19 
  -2  -4   1    1.24    0.17 
   2  -4  -1    0.91    0.24 
  -2  -4   1    0.74    0.26 
   2   4  -1    0.79    0.17 
   2   4  -1    0.64    0.20 
   2   4  -1    0.25    0.20 
   2   4  -1    0.74    0.24 
   2   4  -1    0.68    0.10 
  -2   4   1    0.76    0.28 
   1  -4  -1    2.77    0.34 
   1  -4  -1    2.59    0.31 
  -1  -4   1    2.38    0.29 
   1  -4  -1    3.21    0.33 
  -1  -4   1    2.65    0.36 
  -1   4   1    2.97    0.31 
  -1   4   1    2.74    0.36 
   1   4  -1    2.64    0.35 
   1   4  -1    2.38    0.30 
   1   4  -1    3.04    0.31 
   1   4  -1    2.72    0.31 
   0  -4  -1  139.85   12.24 
   0  -4  -1  149.47   12.25 
   0  -4   1  139.08   12.25 
   0  -4  -1  145.64   12.25 
   0  -4   1  146.09   12.24 
   0   4  -1  159.19   12.26 
   0   4   1  139.39   12.24 
   0   4  -1  140.73   12.24 
   0   4  -1  139.96   12.24 
   0   4   1  162.35   12.26 
  -1  -4  -1   11.98    1.06 
   1  -4   1   12.71    1.07 
  -1  -4  -1   13.02    1.07 
   1  -4   1   11.88    1.06 
  -1  -4  -1   11.13    1.03 
  -1   4  -1   12.34    1.04 
   1   4   1   10.63    1.06 
  -1   4  -1   12.94    1.13 
   1   4   1   11.69    1.07 
   1   4   1   13.86    1.11 
   2  -4   1    0.05    0.24 
   2  -4   1   -0.18    0.19 
  -2  -4  -1    0.38    0.18 
  -2  -4  -1    0.16    0.22 
   2  -4   1    0.04    0.20 
   2   4   1   -0.09    0.20 
   2   4   1   -0.03    0.23 
   2   4   1   -0.25    0.21 
  -2   4  -1   -0.08    0.27 
   2   4   1    0.01    0.24 
   3  -4   1    0.10    0.23 
   3  -4   1    0.61    0.24 
   3  -4   1    0.82    0.29 
  -3  -4  -1    0.35    0.18 
  -3  -4  -1    0.59    0.26 
   3  -4   1    0.33    0.27 
  -3   4  -1    0.86    0.27 
   3   4   1    0.19    0.28 
   3   4   1    0.45    0.24 
   3   4   1    0.37    0.23 
   3   4   1    0.25    0.21 
  -4  -4  -1   31.19    2.59 
  -4  -4  -1   30.04    2.55 
   4  -4   1   29.64    2.57 
   4  -4   1   30.67    2.59 
   4  -4   1   28.23    2.58 
   4  -4   1   29.54    2.58 
   4   4   1   29.05    2.56 
   4   4   1   30.98    2.59 
   4   4   1   28.60    2.57 
   4   4   1   31.22    2.57 
  -4   4  -1   31.55    2.58 
   5  -4   1   14.24    1.27 
   5  -4   1   14.23    1.23 
   5  -4   1   14.21    1.27 
  -5  -4  -1   13.52    1.24 
   5  -4   1   13.94    1.30 
  -5  -4  -1   14.57    1.29 
   5  -4   1   14.10    1.31 
  -5   4  -1   14.16    1.29 
   5   4   1   13.44    1.27 
   5   4   1   15.34    1.27 
   5   4   1   13.20    1.24 
   5   4   1   13.78    1.30 
   6  -4   1   32.20    2.85 
   6  -4   1   33.92    2.89 
   6  -4   1   34.06    2.89 
  -6  -4  -1   32.71    2.89 
   6  -4   1   33.43    2.89 
  -6  -4  -1   34.46    2.86 
   6   4   1   32.00    2.87 
   6   4   1   31.99    2.87 
   6   4   1   35.93    2.88 
   6   4   1   34.34    2.90 
  -6   4  -1   34.50    2.89 
   7  -4   1   14.63    1.34 
   7  -4   1   13.99    1.28 
  -7  -4  -1   14.56    1.29 
  -7  -4  -1   15.02    1.35 
   7  -4   1   15.82    1.33 
   7  -4   1   13.86    1.36 
   7   4   1   13.90    1.36 
   7   4   1   15.44    1.32 
   7   4   1   13.31    1.31 
  -7   4  -1   14.27    1.34 
   7   4   1   14.11    1.30 
   8  -4   1    8.46    0.90 
   8  -4   1    8.56    0.89 
   8  -4   1    7.79    0.79 
  -8  -4  -1    8.07    0.90 
   8  -4   1    8.77    0.87 
  -8  -4  -1    6.56    0.80 
  -8   4  -1    8.77    0.87 
  -8   4  -1    7.93    0.88 
   8   4   1    9.16    0.88 
   8   4   1    8.35    0.88 
   8   4   1    8.40    0.83 
   8   4   1    7.84    0.85 
  -9  -4  -1    0.35    0.30 
   9  -4   1    0.23    0.38 
   9  -4   1    1.03    0.29 
  -9  -4  -1    1.62    0.44 
   9  -4   1    1.24    0.44 
   9  -4   1    2.08    0.44 
   9   4   1    1.37    0.33 
   9   4   1    1.52    0.46 
   9   4   1    1.81    0.41 
   9   4   1    1.29    0.36 
  -9   4  -1    1.25    0.38 
  -9   4  -1    1.07    0.40 
 -10  -4  -1    7.58    0.85 
 -10  -4  -1    6.54    0.89 
  10  -4   1    8.09    0.83 
  10  -4   1    7.58    0.90 
  10  -4   1    8.69    0.89 
 -10   4  -1    7.86    0.87 
 -10   4  -1    8.84    0.92 
  10   4   1    7.64    0.86 
  10   4   1    8.18    0.86 
  10   4   1    8.69    0.90 
  10   4   1    8.28    0.93 
 -11  -4  -1    8.51    0.84 
  11  -4   1    8.00    0.86 
  11  -4   1    7.50    0.94 
  11  -4   1    8.20    0.92 
 -11  -4  -1    7.88    0.92 
  11   4   1    8.54    0.97 
 -11   4  -1    9.83    0.95 
  11   4   1    6.12    0.88 
  11   4   1    8.86    0.85 
  11   4   1    7.88    0.86 
 -11   4  -1    7.40    0.89 
  12  -4   1   10.78    1.20 
  12  -4   1   11.36    1.14 
  12  -4   1   11.78    1.25 
 -12  -4  -1   11.27    1.15 
 -12  -4  -1   11.80    1.23 
 -12   4  -1   11.39    1.24 
  12   4   1   10.03    1.24 
 -12   4  -1   11.99    1.25 
  12   4   1   11.67    1.26 
  12   4   1   12.03    1.20 
 -12   4  -1   13.05    1.22 
  12   4   1   11.26    1.17 
  13  -4   1    1.09    0.62 
 -13  -4  -1    1.51    0.61 
  13  -4   1    1.69    0.43 
  13  -4   1    2.31    0.69 
 -13  -4  -1    0.94    0.46 
 -13   4  -1    1.71    0.53 
  13   4   1    2.23    0.52 
  13   4   1    0.41    0.64 
  13   4   1    2.31    0.49 
 -13   4  -1    1.16    0.49 
 -13   4  -1    1.46    0.56 
 -14  -4  -1    0.98    0.66 
  14  -4   1    1.44    0.46 
  14  -4   1    1.77    0.65 
  14  -4   1    0.04    0.67 
  14   4   1    1.46    0.54 
 -14   4  -1    1.67    0.58 
  14   4   1    1.29    0.72 
  14   4   1    1.53    0.50 
 -14   4  -1    0.84    0.59 
 -14   4  -1    1.73    0.52 
 -15  -4  -1    0.71    0.67 
  15  -4   1   -0.78    0.63 
  15   4   1   -0.11    0.50 
 -15   4  -1    0.12    0.49 
  15   4   1   -0.09    0.48 
  15   4   1    0.62    0.72 
 -15   4  -1    0.04    0.55 
 -16  -4  -1    2.98    0.79 
  16  -4   1    2.39    0.84 
 -16   4  -1    2.95    0.72 
  16   4   1    2.91    0.88 
  16   4   1    4.57    0.71 
 -16   4  -1    4.45    0.70 
  16   4   1    2.73    0.65 
 -16  -5   1    0.95    0.67 
  16  -5  -1   -0.12    0.73 
 -16   5   1   -0.14    0.54 
 -16   5   1    0.74    0.62 
  16   5  -1    0.85    0.58 
  16   5  -1    0.81    0.57 
  15  -5  -1    1.71    0.76 
 -15  -5   1    4.85    0.78 
 -15   5   1    2.30    0.65 
  15   5  -1    3.38    0.67 
 -15   5   1    2.50    0.91 
  15   5  -1    1.65    0.83 
  15   5  -1    3.82    0.64 
 -15   5   1    3.12    0.62 
 -14  -5   1   14.96    1.72 
  14  -5  -1   16.10    1.69 
  14  -5  -1   15.71    1.75 
  14  -5  -1   15.60    1.52 
  14   5  -1   16.59    1.59 
  14   5  -1   17.01    1.61 
  14   5  -1   15.16    1.68 
 -14   5   1   16.84    1.60 
 -14   5   1   15.91    1.62 
 -14   5   1   16.47    1.71 
  13  -5  -1    2.81    0.66 
  13  -5  -1    2.69    0.48 
 -13  -5   1    3.15    0.66 
  13  -5  -1    1.54    0.72 
  13   5  -1    3.27    0.60 
 -13   5   1    1.47    0.63 
  13   5  -1    2.65    0.77 
  13   5  -1    2.36    0.53 
  13   5  -1    2.17    0.73 
 -13   5   1    2.74    0.55 
 -13   5   1    1.78    0.55 
  12  -5  -1    1.01    0.50 
  12  -5  -1   -0.04    0.35 
  12  -5  -1   -0.58    0.58 
 -12  -5   1   -0.08    0.51 
 -12  -5   1   -0.67    0.36 
  12   5  -1    0.36    0.60 
 -12   5   1    0.24    0.43 
 -12   5   1   -0.58    0.48 
  12   5  -1    0.27    0.52 
 -12   5   1   -0.48    0.40 
  12   5  -1    0.25    0.41 
  12   5  -1   -0.32    0.42 
  11  -5  -1    1.53    0.39 
  11  -5  -1    2.11    0.51 
  11  -5  -1    1.52    0.59 
 -11  -5   1    2.77    0.57 
  11  -5  -1    2.23    0.53 
 -11  -5   1    1.87    0.40 
  11   5  -1    2.54    0.56 
 -11   5   1    2.36    0.48 
  11   5  -1    2.97    0.50 
  11   5  -1    2.07    0.45 
 -11   5   1    2.55    0.56 
  11   5  -1    1.32    0.59 
 -10  -5   1   -0.11    0.43 
  10  -5  -1    0.53    0.48 
 -10  -5   1   -0.50    0.29 
  10  -5  -1   -0.46    0.28 
  10  -5  -1    0.28    0.39 
  10  -5  -1   -0.23    0.41 
  10   5  -1    0.15    0.34 
  10   5  -1   -0.84    0.42 
  10   5  -1    0.30    0.38 
 -10   5   1   -0.31    0.43 
  10   5  -1   -0.66    0.50 
 -10   5   1   -0.28    0.35 
  -9  -5   1    1.29    0.43 
  -9  -5   1    0.37    0.28 
   9  -5  -1    1.13    0.39 
   9  -5  -1    0.58    0.38 
   9  -5  -1    0.77    0.29 
   9  -5  -1    0.36    0.46 
   9   5  -1    0.95    0.36 
   9   5  -1    1.32    0.42 
   9   5  -1    0.08    0.33 
   9   5  -1    0.97    0.46 
  -9   5   1    0.65    0.39 
   8  -5  -1    0.06    0.25 
  -8  -5   1    0.23    0.36 
   8  -5  -1   -0.17    0.38 
  -8  -5   1   -0.35    0.23 
   8  -5  -1   -0.02    0.32 
   8  -5  -1   -0.04    0.38 
   8  -5  -1    0.20    0.33 
   8   5  -1    0.69    0.33 
  -8   5   1   -0.17    0.35 
   8   5  -1    0.62    0.35 
   8   5  -1    0.28    0.41 
   8   5  -1    0.11    0.29 
   7  -5  -1    0.35    0.23 
   7  -5  -1    0.89    0.31 
  -7  -5   1   -0.09    0.21 
  -7  -5   1    0.28    0.33 
   7  -5  -1   -0.37    0.35 
   7  -5  -1   -0.01    0.35 
   7  -5  -1   -0.13    0.30 
   7   5  -1    0.00    0.38 
  -7   5   1    0.42    0.34 
   7   5  -1   -0.10    0.26 
   7   5  -1   -0.12    0.30 
   7   5  -1    0.75    0.31 
   6  -5  -1   13.44    1.26 
   6  -5  -1   13.40    1.26 
   6  -5  -1   13.97    1.19 
   6  -5  -1   13.55    1.20 
  -6  -5   1   14.45    1.25 
  -6  -5   1   12.97    1.17 
   6  -5  -1   12.15    1.23 
   6   5  -1   12.82    1.15 
   6   5  -1   12.91    1.21 
   6   5  -1   14.00    1.23 
   6   5  -1   12.69    1.24 
   6   5  -1   12.62    1.25 
  -6   5   1   13.65    1.26 
  -5  -5   1   16.05    1.44 
   5  -5  -1   16.98    1.45 
   5  -5  -1   15.74    1.41 
   5  -5  -1   14.71    1.45 
  -5  -5   1   16.34    1.38 
   5  -5  -1   14.94    1.43 
   5   5  -1   15.96    1.42 
  -5   5   1   15.15    1.45 
   5   5  -1   15.95    1.40 
   5   5  -1   15.94    1.45 
   5   5  -1   15.27    1.43 
   5   5  -1   16.91    1.36 
  -4  -5   1   -0.18    0.28 
   4  -5  -1    0.01    0.27 
   4  -5  -1   -0.17    0.30 
   4  -5  -1   -0.40    0.29 
  -4  -5   1    0.01    0.17 
   4  -5  -1    0.07    0.23 
   4   5  -1    0.44    0.28 
  -4   5   1    0.26    0.31 
   4   5  -1    0.13    0.27 
   4   5  -1    0.45    0.25 
   4   5  -1    0.34    0.13 
   3  -5  -1   43.55    3.78 
   3  -5  -1   44.95    3.77 
  -3  -5   1   44.75    3.76 
  -3  -5   1   45.32    3.79 
   3  -5  -1   44.69    3.80 
   3  -5  -1   42.78    3.79 
   3   5  -1   44.50    3.78 
   3   5  -1   43.87    3.78 
  -3   5   1   46.03    3.79 
   3   5  -1   45.75    3.78 
   2  -5  -1   14.97    1.32 
   2  -5  -1   15.09    1.28 
  -2  -5   1   15.52    1.27 
   2  -5  -1   14.36    1.31 
  -2   5   1   14.14    1.33 
   2   5  -1   15.22    1.31 
   2   5  -1   15.58    1.30 
   2   5  -1   13.60    1.24 
   1  -5  -1    1.74    0.29 
  -1  -5   1    1.44    0.24 
  -1  -5   1    1.72    0.32 
   1  -5  -1    1.06    0.25 
   1  -5  -1    1.49    0.25 
  -1   5   1    0.69    0.21 
   1   5  -1    0.67    0.24 
   1   5  -1    1.15    0.24 
  -1   5   1    2.40    0.36 
   1   5  -1    2.15    0.34 
   0  -5  -1    8.13    0.86 
   0  -5  -1    8.45    0.82 
   0  -5   1    7.45    0.86 
   0  -5  -1    8.03    0.76 
   0  -5   1    9.26    0.80 
   0   5  -1    8.38    0.78 
   0   5   1    9.77    0.92 
   0   5   1    8.22    0.79 
   0   5  -1    9.21    0.90 
   0   5  -1    8.03    0.81 
   1  -5   1   32.48    2.78 
  -1  -5  -1   30.29    2.76 
  -1  -5  -1   32.62    2.78 
  -1  -5  -1   34.37    2.79 
   1  -5   1   34.57    2.79 
  -1   5  -1   34.23    2.83 
   1   5   1   31.65    2.79 
   1   5   1   30.86    2.79 
   1   5   1   36.15    2.81 
  -1   5  -1   31.70    2.77 
   2  -5   1    0.40    0.27 
   2  -5   1    0.62    0.23 
  -2  -5  -1    0.52    0.20 
  -2  -5  -1    0.32    0.24 
   2  -5   1    0.47    0.23 
  -2   5  -1    0.34    0.32 
   2   5   1    0.12    0.25 
  -2   5  -1   -0.01    0.12 
   2   5   1    0.19    0.23 
   2   5   1    0.34    0.25 
   3  -5   1    5.64    0.55 
  -3  -5  -1    6.00    0.54 
  -3  -5  -1    5.15    0.55 
   3  -5   1    4.87    0.53 
   3  -5   1    5.07    0.56 
  -3   5  -1    5.27    0.58 
   3   5   1    5.61    0.58 
   3   5   1    4.63    0.54 
   3   5   1    5.60    0.57 
   3   5   1    5.05    0.57 
   4  -5   1   17.96    1.50 
   4  -5   1   15.67    1.48 
  -4  -5  -1   15.69    1.44 
   4  -5   1   17.64    1.47 
   4   5   1   18.63    1.47 
  -4   5  -1   16.98    1.50 
   4   5   1   15.00    1.46 
   4   5   1   14.68    1.47 
   4   5   1   17.70    1.50 
   5  -5   1   21.56    1.73 
   5  -5   1   16.19    1.71 
   5  -5   1   17.72    1.70 
   5  -5   1   19.27    1.68 
  -5  -5  -1   19.71    1.71 
  -5  -5  -1   19.34    1.66 
   5   5   1   18.38    1.72 
   5   5   1   21.66    1.69 
  -5   5  -1   21.59    1.72 
   5   5   1   17.46    1.69 
   5   5   1   18.26    1.67 
  -6  -5  -1   15.83    1.30 
   6  -5   1   12.80    1.37 
  -6  -5  -1   15.43    1.37 
   6  -5   1   15.26    1.29 
   6  -5   1   14.73    1.35 
   6  -5   1   13.55    1.33 
   6   5   1   13.79    1.33 
   6   5   1   13.85    1.38 
   6   5   1   16.17    1.32 
   6   5   1   17.00    1.35 
  -6   5  -1   12.80    1.36 
   7  -5   1    0.12    0.35 
  -7  -5  -1    0.49    0.24 
   7  -5   1    0.65    0.24 
   7  -5   1    0.09    0.32 
  -7  -5  -1    0.08    0.33 
   7  -5   1    0.96    0.32 
  -7   5  -1    0.36    0.34 
   7   5   1    0.99    0.28 
   7   5   1    0.11    0.38 
   7   5   1    0.85    0.31 
   7   5   1    0.67    0.30 
   8  -5   1    5.78    0.68 
   8  -5   1    7.15    0.78 
   8  -5   1    6.74    0.77 
   8  -5   1    7.02    0.73 
  -8  -5  -1    6.38    0.74 
  -8  -5  -1    6.78    0.71 
   8   5   1    7.43    0.77 
   8   5   1    6.99    0.76 
   8   5   1    6.55    0.70 
  -8   5  -1    6.93    0.75 
   8   5   1    7.83    0.80 
  -9  -5  -1    5.82    0.61 
   9  -5   1    5.41    0.67 
   9  -5   1    5.96    0.60 
   9  -5   1    5.03    0.71 
  -9  -5  -1    6.20    0.71 
   9  -5   1    5.50    0.68 
   9   5   1    4.78    0.73 
   9   5   1    6.90    0.67 
   9   5   1    5.00    0.67 
  -9   5  -1    6.47    0.68 
   9   5   1    6.02    0.63 
  -9   5  -1    5.12    0.69 
  10  -5   1    2.32    0.42 
  10  -5   1    4.14    0.55 
  10  -5   1    3.62    0.60 
 -10  -5  -1    1.80    0.55 
  10  -5   1    3.58    0.54 
 -10  -5  -1    3.02    0.44 
 -10   5  -1    2.61    0.52 
  10   5   1    2.81    0.46 
  10   5   1    2.39    0.60 
 -10   5  -1    3.36    0.57 
  10   5   1    3.44    0.51 
  10   5   1    3.62    0.54 
 -11  -5  -1    0.45    0.35 
  11  -5   1    0.49    0.49 
  11  -5   1    0.28    0.32 
 -11  -5  -1    0.63    0.50 
  11  -5   1    0.28    0.53 
  11   5   1    0.90    0.43 
  11   5   1    0.29    0.56 
  11   5   1    0.14    0.47 
 -11   5  -1    0.86    0.43 
  11   5   1    0.80    0.37 
 -11   5  -1    1.42    0.47 
  12  -5   1    6.45    0.88 
 -12  -5  -1    7.45    0.78 
  12  -5   1    7.11    0.75 
 -12  -5  -1    6.70    0.89 
  12  -5   1    6.44    0.92 
  12   5   1    7.85    0.84 
 -12   5  -1    6.81    0.86 
  12   5   1    8.22    0.81 
  12   5   1    5.70    0.85 
 -12   5  -1    7.90    0.83 
  12   5   1    4.94    0.92 
 -13  -5  -1    2.88    0.67 
  13  -5   1    4.59    0.79 
  13  -5   1    3.77    0.54 
  13  -5   1    3.04    0.71 
 -13  -5  -1    3.33    0.74 
  13   5   1    3.98    0.80 
  13   5   1    4.80    0.64 
 -13   5  -1    4.21    0.64 
 -13   5  -1    2.79    0.63 
  13   5   1    4.63    0.61 
 -13   5  -1    2.94    0.67 
  14  -5   1    0.28    0.64 
  14  -5   1    1.00    0.69 
 -14  -5  -1    0.33    0.61 
 -14   5  -1   -0.20    0.57 
 -14   5  -1    0.44    0.51 
  14   5   1   -0.42    0.50 
 -14   5  -1    0.49    0.48 
  14   5   1   -1.19    0.68 
  14   5   1   -0.01    0.47 
  15  -5   1   -0.07    0.65 
 -15  -5  -1    0.73    0.63 
 -15   5  -1   -0.23    0.56 
  15   5   1   -0.51    0.72 
  15   5   1    0.14    0.52 
 -15   5  -1   -0.21    0.52 
  15   5   1   -0.22    0.51 
 -16  -5  -1    0.04    0.66 
  16  -5   1    0.54    0.76 
 -16   5  -1    0.21    0.53 
  16   5   1   -0.86    0.57 
  16   5   1   -0.29    0.76 
  16   5   1    0.63    0.53 
 -16   5  -1   -0.63    0.56 
  16  -6  -1    0.68    0.79 
 -16  -6   1    1.20    0.69 
  16   6  -1   -0.03    0.58 
 -16   6   1   -0.24    0.58 
  16   6  -1   -0.37    0.55 
 -16   6   1   -0.43    0.53 
  15  -6  -1    1.42    0.78 
  15  -6  -1    2.45    0.73 
 -15  -6   1    1.16    0.70 
  15   6  -1    1.08    0.56 
  15   6  -1    0.40    0.56 
 -15   6   1    1.76    0.56 
 -15   6   1    1.81    0.59 
 -15   6   1    1.30    0.68 
  14  -6  -1    1.58    0.74 
 -14  -6   1    0.68    0.64 
  14  -6  -1    0.87    0.62 
 -14   6   1    1.25    0.64 
 -14   6   1    1.62    0.53 
 -14   6   1    0.71    0.54 
  14   6  -1    1.61    0.54 
  14   6  -1    1.46    0.58 
  14   6  -1    0.01    0.70 
 -13  -6   1   18.03    1.89 
  13  -6  -1   17.86    1.84 
  13  -6  -1   19.26    2.00 
 -13   6   1   19.67    1.83 
 -13   6   1   16.79    1.88 
  13   6  -1   20.44    1.81 
  13   6  -1   20.34    1.95 
  13   6  -1   20.23    1.86 
 -13   6   1   20.19    1.83 
 -12  -6   1    1.22    0.52 
 -12  -6   1    1.50    0.59 
  12  -6  -1    1.59    0.67 
  12  -6  -1    2.26    0.56 
  12   6  -1    1.31    0.47 
  12   6  -1    1.51    0.58 
 -12   6   1    1.71    0.49 
 -12   6   1    0.73    0.57 
  12   6  -1    2.56    0.54 
  12   6  -1    1.15    0.65 
  11  -6  -1    0.15    0.32 
  11  -6  -1   -0.02    0.47 
  11  -6  -1    1.43    0.46 
  11  -6  -1   -0.50    0.54 
 -11  -6   1   -0.53    0.31 
 -11  -6   1   -0.28    0.46 
  11   6  -1   -0.58    0.54 
 -11   6   1    0.38    0.41 
  11   6  -1   -0.12    0.47 
  11   6  -1    0.51    0.40 
 -11   6   1    0.09    0.49 
  11   6  -1    0.66    0.45 
 -10  -6   1   -0.25    0.29 
  10  -6  -1    0.04    0.41 
  10  -6  -1   -0.28    0.49 
  10  -6  -1    0.42    0.30 
 -10  -6   1   -0.55    0.44 
  10  -6  -1    0.54    0.42 
  10   6  -1    0.03    0.50 
 -10   6   1   -0.43    0.38 
  10   6  -1   -0.41    0.33 
  10   6  -1    0.52    0.40 
 -10   6   1    0.11    0.44 
  10   6  -1   -0.06    0.43 
   9  -6  -1   13.27    1.28 
   9  -6  -1   11.57    1.19 
   9  -6  -1   15.00    1.35 
  -9  -6   1   12.32    1.32 
  -9  -6   1   12.01    1.19 
   9  -6  -1   12.42    1.26 
   9   6  -1   14.61    1.27 
   9   6  -1   12.93    1.33 
  -9   6   1   12.74    1.29 
   9   6  -1   14.44    1.27 
   9   6  -1   12.67    1.22 
   8  -6  -1    2.25    0.41 
   8  -6  -1    2.23    0.49 
  -8  -6   1    1.51    0.43 
   8  -6  -1    1.78    0.45 
  -8  -6   1    1.40    0.30 
   8  -6  -1    1.98    0.40 
   8   6  -1    1.64    0.46 
  -8   6   1    1.66    0.43 
   8   6  -1    2.01    0.40 
   8   6  -1    1.29    0.36 
   8   6  -1    1.96    0.41 
  -7  -6   1   -0.30    0.20 
   7  -6  -1    0.47    0.38 
   7  -6  -1   -0.05    0.37 
   7  -6  -1    0.08    0.32 
  -7  -6   1    0.19    0.34 
   7  -6  -1    0.16    0.29 
  -7   6   1    0.37    0.36 
   7   6  -1   -0.14    0.30 
   7   6  -1    0.30    0.27 
   7   6  -1   -0.03    0.37 
   7   6  -1    0.44    0.33 
  -6  -6   1   10.09    1.01 
   6  -6  -1    8.95    0.95 
   6  -6  -1    9.21    0.98 
   6  -6  -1   10.80    1.01 
  -6  -6   1    9.75    0.90 
   6  -6  -1   10.24    1.02 
   6   6  -1   11.64    0.98 
   6   6  -1    9.18    1.02 
   6   6  -1   10.08    0.98 
  -6   6   1   10.02    1.02 
   6   6  -1    9.94    0.94 
   5  -6  -1    4.18    0.49 
  -5  -6   1    3.23    0.48 
   5  -6  -1    4.13    0.48 
   5  -6  -1    3.33    0.51 
  -5  -6   1    3.61    0.39 
   5  -6  -1    3.33    0.43 
   5   6  -1    3.41    0.44 
  -5   6   1    2.90    0.48 
   5   6  -1    3.25    0.46 
   5   6  -1    4.00    0.36 
   5   6  -1    4.16    0.44 
   4  -6  -1    0.17    0.28 
   4  -6  -1    0.25    0.30 
  -4  -6   1    0.31    0.30 
   4  -6  -1    0.25    0.24 
  -4  -6   1    0.52    0.19 
   4  -6  -1    0.46    0.33 
   4   6  -1    0.48    0.25 
  -4   6   1   -0.17    0.32 
   4   6  -1    0.72    0.29 
   4   6  -1    0.70    0.28 
  -3  -6   1    2.05    0.23 
  -3  -6   1    1.14    0.31 
   3  -6  -1    1.28    0.31 
   3  -6  -1    1.69    0.38 
   3  -6  -1    1.81    0.28 
   3  -6  -1    1.36    0.35 
   3   6  -1    1.42    0.31 
   3   6  -1    1.31    0.28 
  -3   6   1    1.22    0.35 
   3   6  -1    1.73    0.32 
   2  -6  -1   20.94    1.86 
   2  -6  -1   22.71    1.83 
   2  -6  -1   20.12    1.85 
  -2  -6   1   21.13    1.82 
   2   6  -1   20.24    1.84 
   2   6  -1   23.61    1.87 
   2   6  -1   20.84    1.84 
  -2   6   1   22.84    1.88 
  -2   6   1   19.88    1.81 
   1  -6  -1   19.65    1.87 
   1  -6  -1   23.30    1.89 
  -1  -6   1   22.36    1.92 
  -1  -6   1   22.20    1.88 
   1  -6  -1   21.50    1.90 
  -1   6   1   25.17    1.93 
  -1   6   1   20.20    1.86 
   1   6  -1   20.36    1.88 
   1   6  -1   19.73    1.87 
   1   6  -1   25.51    1.94 
   0  -6  -1   -0.15    0.27 
   0  -6   1    0.12    0.24 
   0  -6   1    0.14    0.34 
   0  -6  -1   -0.13    0.20 
   0  -6  -1    1.09    0.34 
   0   6  -1    1.01    0.40 
   0   6  -1    0.16    0.26 
   0   6   1    0.03    0.26 
   0   6  -1    0.04    0.22 
   0   6   1    0.62    0.40 
   1  -6   1   48.70    4.10 
   1  -6   1   53.04    4.10 
  -1  -6  -1   48.29    4.09 
  -1  -6  -1   51.38    4.11 
  -1  -6  -1   45.80    4.07 
   1   6   1   45.82    4.10 
  -1   6  -1   47.94    4.08 
   1   6   1   48.48    4.12 
   1   6   1   47.16    4.10 
  -2  -6  -1   36.72    3.15 
  -2  -6  -1   38.25    3.18 
   2  -6   1   37.82    3.17 
   2  -6   1   39.12    3.16 
  -2   6  -1   39.02    3.20 
  -2   6  -1   36.43    3.14 
   2   6   1   35.19    3.17 
   2   6   1   35.98    3.17 
   2   6   1   37.28    3.17 
   3  -6   1   20.78    1.80 
  -3  -6  -1   21.24    1.77 
  -3  -6  -1   19.88    1.80 
   3  -6   1   21.64    1.78 
   3   6   1   20.57    1.79 
   3   6   1   18.55    1.78 
   3   6   1   20.38    1.79 
  -3   6  -1   21.58    1.82 
  -4  -6  -1    0.41    0.30 
   4  -6   1    0.20    0.26 
   4  -6   1    0.25    0.34 
  -4  -6  -1    0.95    0.22 
   4  -6   1    0.55    0.32 
   4  -6   1    0.76    0.29 
  -4   6  -1    0.45    0.31 
   4   6   1    0.36    0.25 
   4   6   1    0.88    0.30 
   4   6   1    0.43    0.27 
   4   6   1    0.22    0.31 
  -5  -6  -1   13.04    1.13 
   5  -6   1   13.16    1.17 
   5  -6   1   11.99    1.19 
  -5  -6  -1   12.43    1.20 
   5  -6   1   13.54    1.23 
   5   6   1   12.95    1.21 
   5   6   1   13.97    1.18 
   5   6   1   11.11    1.18 
   5   6   1   11.66    1.16 
  -5   6  -1   13.68    1.22 
   6  -6   1    2.01    0.37 
   6  -6   1    2.42    0.45 
  -6  -6  -1    2.65    0.43 
   6  -6   1    2.41    0.39 
  -6  -6  -1    2.03    0.32 
   6   6   1    2.92    0.39 
  -6   6  -1    2.74    0.43 
   6   6   1    2.27    0.40 
   6   6   1    2.39    0.36 
   6   6   1    2.30    0.44 
   7  -6   1    0.14    0.36 
  -7  -6  -1    0.16    0.34 
  -7  -6  -1    0.53    0.23 
   7  -6   1    0.12    0.31 
   7  -6   1   -0.25    0.31 
   7   6   1   -0.39    0.26 
   7   6   1    0.43    0.30 
   7   6   1   -0.52    0.29 
   7   6   1    0.12    0.38 
  -7   6  -1    0.19    0.33 
  -8  -6  -1   14.50    1.28 
  -8  -6  -1   14.41    1.36 
   8  -6   1   12.95    1.39 
   8  -6   1   14.12    1.34 
   8  -6   1   14.34    1.34 
   8   6   1   13.31    1.39 
   8   6   1   13.92    1.30 
   8   6   1   13.60    1.32 
   8   6   1   16.77    1.34 
  -8   6  -1   13.27    1.35 
   9  -6   1   21.53    1.95 
  -9  -6  -1   21.59    1.88 
   9  -6   1   22.35    1.95 
   9  -6   1   21.12    1.99 
  -9  -6  -1   20.27    1.96 
  -9   6  -1   20.78    1.96 
  -9   6  -1   21.29    1.93 
   9   6   1   22.58    1.93 
   9   6   1   21.25    1.93 
   9   6   1   21.04    1.99 
   9   6   1   22.13    1.91 
 -10  -6  -1    3.88    0.47 
  10  -6   1    3.94    0.57 
  10  -6   1    3.58    0.64 
  10  -6   1    3.38    0.44 
  10  -6   1    3.35    0.56 
 -10  -6  -1    3.32    0.60 
  10   6   1    2.25    0.64 
  10   6   1    2.73    0.55 
 -10   6  -1    2.94    0.54 
  10   6   1    3.52    0.50 
 -10   6  -1    2.88    0.58 
  10   6   1    4.33    0.55 
 -11  -6  -1    3.02    0.47 
  11  -6   1    3.12    0.59 
  11  -6   1    3.21    0.65 
 -11  -6  -1    1.86    0.60 
 -11   6  -1    2.93    0.59 
  11   6   1    2.94    0.67 
  11   6   1    3.61    0.56 
 -11   6  -1    3.47    0.55 
  11   6   1    3.36    0.50 
  11   6   1    2.86    0.59 
  12  -6   1    0.30    0.59 
 -12  -6  -1   -0.44    0.36 
  12  -6   1    0.22    0.52 
 -12  -6  -1    0.48    0.52 
  12   6   1    0.37    0.41 
 -12   6  -1   -1.31    0.49 
 -12   6  -1   -0.59    0.42 
  12   6   1    0.51    0.63 
  12   6   1    0.33    0.47 
  12   6   1    0.51    0.56 
  13  -6   1    1.01    0.58 
  13  -6   1    0.09    0.68 
 -13  -6  -1    0.53    0.58 
  13   6   1    0.43    0.67 
  13   6   1   -0.11    0.48 
  13   6   1   -0.20    0.42 
 -13   6  -1    0.82    0.49 
 -13   6  -1    0.41    0.55 
  14  -6   1   -0.35    0.61 
 -14  -6  -1    0.67    0.66 
  14  -6   1   -0.14    0.68 
 -14   6  -1    0.46    0.52 
  14   6   1   -0.12    0.69 
  14   6   1    0.26    0.53 
  14   6   1    0.25    0.47 
 -14   6  -1    0.12    0.49 
 -14   6  -1    0.52    0.62 
 -15  -6  -1    1.23    0.68 
  15  -6   1   -0.07    0.63 
  15   6   1   -0.21    0.57 
  15   6   1    0.14    0.51 
 -15   6  -1   -0.05    0.54 
 -15   6  -1    0.77    0.52 
  15   6   1    0.12    0.79 
 -16  -6  -1    1.66    0.74 
  16  -6   1    1.51    0.77 
  16   6   1    0.83    0.57 
 -16   6  -1    0.15    0.59 
  16   6   1    0.70    0.62 
 -16   6  -1    0.21    0.56 
  16   6   1   -1.26    0.76 
 -16  -7   1   -0.47    0.68 
  16   7  -1   -0.41    0.57 
  16   7  -1   -0.02    0.63 
 -16   7   1   -0.20    0.53 
  15  -7  -1    0.62    0.68 
 -15  -7   1    2.31    0.76 
  15  -7  -1   -0.10    0.81 
 -15   7   1    2.10    0.59 
 -15   7   1    0.26    0.53 
  15   7  -1    1.22    0.57 
 -15   7   1    1.33    0.70 
  15   7  -1    0.84    0.59 
 -14  -7   1    5.49    0.96 
  14  -7  -1    8.66    1.08 
  14  -7  -1    7.05    0.94 
  14   7  -1    6.71    0.86 
 -14   7   1    6.00    0.85 
  14   7  -1    5.53    0.85 
 -14   7   1    7.77    0.98 
 -14   7   1    7.28    0.85 
 -13  -7   1    1.93    0.65 
  13  -7  -1    0.70    0.71 
  13  -7  -1    1.64    0.60 
  13   7  -1    0.51    0.48 
 -13   7   1    1.44    0.64 
 -13   7   1    0.16    0.47 
 -13   7   1   -0.44    0.45 
  13   7  -1   -0.04    0.49 
  12  -7  -1    3.94    0.66 
  12  -7  -1    3.85    0.68 
 -12  -7   1    4.72    0.73 
  12  -7  -1    3.67    0.78 
  12   7  -1    4.76    0.63 
 -12   7   1    3.60    0.63 
  12   7  -1    4.86    0.66 
  12   7  -1    4.46    0.79 
  12   7  -1    3.69    0.71 
 -12   7   1    4.24    0.74 
  11  -7  -1    0.30    0.47 
  11  -7  -1   -0.79    0.55 
 -11  -7   1   -0.03    0.51 
  11  -7  -1    0.15    0.45 
 -11  -7   1   -0.30    0.31 
  11   7  -1    0.12    0.42 
 -11   7   1   -0.34    0.41 
  11   7  -1   -0.19    0.39 
 -11   7   1    0.35    0.52 
  11   7  -1   -0.29    0.55 
  11   7  -1    0.25    0.49 
 -10  -7   1    2.28    0.39 
 -10  -7   1    2.42    0.56 
  10  -7  -1    2.26    0.58 
  10  -7  -1    2.39    0.50 
  10  -7  -1    3.06    0.52 
 -10   7   1    2.16    0.56 
  10   7  -1    1.59    0.43 
  10   7  -1    2.11    0.58 
  10   7  -1    1.40    0.51 
  10   7  -1    2.84    0.49 
   9  -7  -1    5.00    0.64 
  -9  -7   1    4.91    0.56 
  -9  -7   1    4.63    0.68 
   9  -7  -1    5.94    0.75 
   9  -7  -1    6.04    0.67 
  -9   7   1    6.13    0.71 
   9   7  -1    5.48    0.65 
   9   7  -1    5.27    0.73 
   9   7  -1    5.09    0.61 
   9   7  -1    4.65    0.65 
  -8  -7   1    1.12    0.28 
  -8  -7   1    0.58    0.42 
   8  -7  -1    1.75    0.45 
   8  -7  -1    1.02    0.39 
   8  -7  -1    0.73    0.46 
   8  -7  -1    0.78    0.35 
   8   7  -1    1.20    0.39 
   8   7  -1    1.64    0.36 
   8   7  -1    2.08    0.41 
  -8   7   1    1.69    0.45 
   8   7  -1    0.66    0.45 
  -7  -7   1    2.23    0.32 
   7  -7  -1    1.97    0.39 
   7  -7  -1    2.57    0.43 
   7  -7  -1    1.74    0.44 
  -7  -7   1    1.96    0.43 
   7  -7  -1    2.88    0.49 
   7   7  -1    2.35    0.38 
   7   7  -1    2.60    0.43 
   7   7  -1    2.54    0.42 
  -7   7   1    2.40    0.46 
  -6  -7   1    3.46    0.37 
   6  -7  -1    2.89    0.48 
   6  -7  -1    3.39    0.47 
   6  -7  -1    2.96    0.42 
  -6  -7   1    3.34    0.48 
   6  -7  -1    3.77    0.52 
   6   7  -1    3.09    0.46 
  -6   7   1    2.99    0.50 
   6   7  -1    2.66    0.42 
   6   7  -1    3.94    0.47 
   5  -7  -1   -0.55    0.31 
   5  -7  -1   -0.02    0.30 
  -5  -7   1   -0.25    0.31 
   5  -7  -1    0.55    0.35 
   5  -7  -1   -0.32    0.26 
  -5  -7   1    0.39    0.20 
  -5   7   1    0.26    0.35 
   5   7  -1    0.36    0.29 
   5   7  -1    0.23    0.30 
   5   7  -1    0.26    0.27 
   4  -7  -1    0.23    0.34 
   4  -7  -1    0.19    0.24 
   4  -7  -1   -0.02    0.29 
  -4  -7   1    0.21    0.31 
  -4  -7   1    0.27    0.19 
   4  -7  -1   -0.16    0.30 
   4   7  -1    0.02    0.28 
  -4   7   1    0.40    0.34 
   4   7  -1    0.28    0.25 
   4   7  -1   -0.05    0.29 
   3  -7  -1    7.28    0.68 
  -3  -7   1    6.80    0.68 
   3  -7  -1    7.68    0.72 
   3  -7  -1    6.26    0.65 
  -3  -7   1    6.40    0.63 
   3   7  -1    6.71    0.69 
  -3   7   1    4.79    0.67 
   3   7  -1    6.82    0.69 
   3   7  -1    5.96    0.65 
   2  -7  -1    0.69    0.30 
   2  -7  -1    1.05    0.32 
  -2  -7   1    0.97    0.24 
  -2  -7   1    0.97    0.33 
   2  -7  -1    1.02    0.27 
   2   7  -1    0.60    0.28 
  -2   7   1    0.86    0.21 
  -2   7   1    1.30    0.37 
   2   7  -1    1.31    0.35 
   2   7  -1    1.03    0.29 
   1  -7  -1   16.87    1.43 
  -1  -7   1   16.02    1.40 
   1  -7  -1   15.09    1.39 
   1  -7  -1   15.72    1.43 
  -1  -7   1   15.37    1.46 
  -1   7   1   16.80    1.48 
  -1   7   1   16.49    1.39 
   1   7  -1   17.43    1.47 
   1   7  -1   15.07    1.40 
   1   7  -1   14.10    1.39 
   0  -7  -1    0.55    0.35 
   0  -7   1    0.33    0.27 
   0  -7  -1    0.47    0.29 
   0  -7  -1    0.66    0.23 
   0  -7   1    0.38    0.35 
   0   7   1    0.73    0.31 
   0   7   1    1.39    0.43 
   0   7  -1    0.49    0.30 
   0   7  -1    0.85    0.26 
   0   7  -1    0.77    0.43 
   1  -7   1   57.07    4.57 
  -1  -7  -1   49.81    4.53 
  -1  -7  -1   54.30    4.56 
   1  -7   1   55.35    4.56 
  -1  -7  -1   56.64    4.58 
   1   7   1   56.02    4.59 
  -1   7  -1   50.51    4.54 
   1   7   1   52.28    4.56 
   1   7   1   51.87    4.57 
  -1   7  -1   57.13    4.61 
  -2  -7  -1    0.12    0.29 
   2  -7   1    0.51    0.26 
  -2  -7  -1    0.07    0.22 
   2  -7   1    0.36    0.28 
   2   7   1   -0.18    0.27 
   2   7   1    0.26    0.28 
  -2   7  -1    0.39    0.17 
  -2   7  -1    0.53    0.38 
   2   7   1    0.16    0.32 
   3  -7   1    3.88    0.41 
   3  -7   1    3.91    0.45 
  -3  -7  -1    2.85    0.43 
  -3  -7  -1    3.60    0.38 
   3   7   1    3.12    0.43 
   3   7   1    3.37    0.43 
  -3   7  -1    3.71    0.51 
  -3   7  -1    2.94    0.33 
   3   7   1    3.52    0.42 
  -4  -7  -1   19.84    1.77 
  -4  -7  -1   20.60    1.72 
   4  -7   1   19.14    1.74 
   4  -7   1   19.79    1.76 
   4   7   1   19.34    1.74 
  -4   7  -1   21.38    1.78 
   4   7   1   21.08    1.74 
   4   7   1   17.91    1.76 
   5  -7   1   12.66    1.15 
   5  -7   1   13.45    1.23 
  -5  -7  -1   12.28    1.19 
   5  -7   1   12.09    1.20 
  -5  -7  -1   12.93    1.12 
   5   7   1   11.71    1.18 
   5   7   1   13.06    1.16 
  -5   7  -1   12.63    1.20 
   5   7   1   12.19    1.21 
   5   7   1   12.07    1.14 
  -6  -7  -1    0.74    0.25 
   6  -7   1    0.44    0.32 
  -6  -7  -1    0.93    0.36 
   6  -7   1    1.32    0.40 
   6  -7   1    0.78    0.32 
   6   7   1    0.52    0.31 
   6   7   1    1.04    0.40 
  -6   7  -1    1.18    0.36 
   6   7   1    0.98    0.29 
   6   7   1    0.74    0.31 
  -7  -7  -1    2.71    0.44 
  -7  -7  -1    2.21    0.33 
   7  -7   1    2.34    0.40 
   7  -7   1    1.88    0.42 
   7  -7   1    2.65    0.48 
   7   7   1    1.91    0.40 
   7   7   1    2.56    0.37 
   7   7   1    2.79    0.48 
   7   7   1    1.72    0.40 
  -7   7  -1    2.15    0.45 
  -8  -7  -1    0.87    0.27 
   8  -7   1    0.27    0.38 
   8  -7   1    1.09    0.46 
  -8  -7  -1    0.98    0.42 
   8  -7   1    0.58    0.37 
   8   7   1    1.00    0.45 
   8   7   1    1.23    0.35 
   8   7   1    0.61    0.32 
   8   7   1    1.20    0.37 
  -8   7  -1    0.96    0.40 
   9  -7   1    2.04    0.43 
   9  -7   1    0.47    0.41 
  -9  -7  -1    1.38    0.46 
   9  -7   1    2.12    0.53 
  -9  -7  -1    1.71    0.33 
   9   7   1    1.58    0.43 
   9   7   1    1.32    0.38 
  -9   7  -1    1.81    0.47 
   9   7   1    1.87    0.44 
   9   7   1    2.07    0.54 
  10  -7   1    6.20    0.84 
 -10  -7  -1    7.89    0.89 
 -10  -7  -1    7.60    0.80 
  10  -7   1    8.32    0.93 
  10  -7   1    7.27    0.86 
 -10   7  -1    6.99    0.83 
 -10   7  -1    7.48    0.88 
  10   7   1    6.91    0.90 
  10   7   1    8.49    0.81 
  10   7   1    7.58    0.84 
  10   7   1    7.82    0.84 
  11  -7   1    0.52    0.46 
  11  -7   1    0.34    0.47 
 -11  -7  -1    0.54    0.33 
 -11  -7  -1    0.23    0.51 
  11  -7   1    0.46    0.57 
  11   7   1   -0.14    0.39 
 -11   7  -1    0.40    0.48 
  11   7   1    0.50    0.44 
  11   7   1    0.52    0.57 
 -11   7  -1    0.46    0.45 
  11   7   1    0.58    0.48 
 -12  -7  -1    1.62    0.58 
  12  -7   1    0.15    0.51 
  12  -7   1   -0.21    0.61 
 -12  -7  -1   -0.44    0.35 
 -12   7  -1    1.68    0.58 
  12   7   1   -0.10    0.63 
 -12   7  -1    0.49    0.48 
  12   7   1    0.70    0.43 
  12   7   1    0.97    0.47 
  13  -7   1    5.82    1.09 
  13  -7   1    8.69    1.06 
 -13  -7  -1   10.31    1.11 
  13   7   1    9.52    0.98 
 -13   7  -1    9.51    1.01 
 -13   7  -1    8.58    1.08 
  13   7   1    8.61    1.12 
  13   7   1   10.11    1.03 
 -14  -7  -1   -0.51    0.63 
  14  -7   1    0.84    0.74 
  14  -7   1    0.95    0.62 
  14   7   1    0.61    0.76 
 -14   7  -1    0.94    0.65 
 -14   7  -1    0.15    0.51 
  14   7   1   -0.34    0.55 
 -14   7  -1    0.16    0.50 
  14   7   1    0.57    0.48 
  15  -7   1   -0.81    0.65 
 -15  -7  -1    0.12    0.71 
 -15   7  -1    0.15    0.54 
 -15   7  -1    0.52    0.55 
  15   7   1   -0.79    0.51 
  15   7   1   -0.59    0.54 
 -16  -7  -1    1.92    0.77 
  16  -7   1    1.89    0.82 
  16   7   1    2.74    0.70 
 -16   7  -1    2.16    0.68 
  16   7   1    1.59    0.64 
 -16   7  -1    3.60    0.67 
 -16  -8   1    1.17    0.77 
  16   8  -1    1.39    0.65 
  16   8  -1    1.87    0.62 
 -16   8   1    1.67    0.60 
  15  -8  -1    0.65    0.81 
  15  -8  -1   -0.23    0.65 
 -15  -8   1    0.45    0.72 
  15   8  -1   -0.23    0.53 
 -15   8   1    1.31    0.70 
 -15   8   1    0.12    0.55 
  15   8  -1    1.29    0.60 
 -15   8   1    0.89    0.54 
 -14  -8   1    4.64    0.85 
  14  -8  -1    4.12    0.82 
  14  -8  -1    2.67    0.90 
  14   8  -1    6.16    0.76 
 -14   8   1    5.60    0.76 
 -14   8   1    4.52    0.74 
  14   8  -1    6.63    0.80 
 -14   8   1    4.95    0.88 
  13  -8  -1   13.72    1.53 
  13  -8  -1   13.20    1.49 
 -13  -8   1   13.49    1.53 
 -13   8   1   13.36    1.45 
  13   8  -1   14.51    1.46 
 -13   8   1   15.29    1.59 
  13   8  -1   14.44    1.43 
  12  -8  -1    8.10    0.95 
  12  -8  -1    7.10    0.93 
  12  -8  -1    6.81    1.04 
 -12  -8   1    8.17    0.99 
  12   8  -1    8.65    0.93 
  12   8  -1    7.31    0.95 
 -12   8   1    7.34    1.00 
 -12   8   1    8.39    0.92 
  12   8  -1    8.56    0.89 
  11  -8  -1    0.22    0.46 
 -11  -8   1   -0.05    0.33 
  11  -8  -1   -0.78    0.54 
 -11  -8   1    0.21    0.51 
  11  -8  -1    0.38    0.46 
 -11   8   1   -0.08    0.54 
  11   8  -1    0.54    0.47 
  11   8  -1    0.84    0.50 
 -11   8   1   -0.29    0.42 
  11   8  -1    0.75    0.42 
  10  -8  -1   -0.46    0.41 
  10  -8  -1    0.56    0.56 
 -10  -8   1    0.16    0.49 
  10  -8  -1    0.09    0.44 
 -10  -8   1   -0.21    0.28 
  10   8  -1    0.34    0.37 
  10   8  -1   -0.52    0.40 
  10   8  -1   -0.33    0.43 
 -10   8   1   -0.15    0.51 
   9  -8  -1   12.38    1.26 
  -9  -8   1   12.71    1.18 
   9  -8  -1   12.97    1.35 
   9  -8  -1   13.87    1.32 
  -9  -8   1   12.09    1.31 
   9   8  -1   12.10    1.27 
   9   8  -1   13.47    1.26 
  -9   8   1   13.33    1.35 
   9   8  -1   13.41    1.28 
   8  -8  -1    0.61    0.48 
   8  -8  -1    0.19    0.43 
   8  -8  -1    0.32    0.35 
   8  -8  -1    0.23    0.37 
  -8  -8   1    0.63    0.25 
  -8  -8   1    0.63    0.41 
   8   8  -1    0.63    0.32 
  -8   8   1    0.66    0.42 
   8   8  -1    0.25    0.37 
   8   8  -1    1.18    0.38 
  -7  -8   1    1.83    0.30 
   7  -8  -1    2.24    0.49 
   7  -8  -1    2.21    0.38 
   7  -8  -1    2.13    0.46 
  -7  -8   1    2.37    0.46 
   7  -8  -1    2.40    0.43 
  -7   8   1    2.56    0.48 
   7   8  -1    2.02    0.38 
   7   8  -1    1.29    0.40 
   7   8  -1    2.63    0.44 
   6  -8  -1    2.42    0.50 
   6  -8  -1    2.45    0.47 
   6  -8  -1    3.49    0.46 
  -6  -8   1    3.30    0.35 
  -6  -8   1    2.33    0.45 
   6  -8  -1    2.57    0.40 
  -6   8   1    3.31    0.49 
   6   8  -1    2.36    0.40 
   6   8  -1    2.58    0.44 
   6   8  -1    2.82    0.44 
   5  -8  -1    5.52    0.62 
  -5  -8   1    6.58    0.62 
   5  -8  -1    5.47    0.70 
   5  -8  -1    6.61    0.69 
   5  -8  -1    6.20    0.67 
  -5  -8   1    6.24    0.68 
   5   8  -1    5.54    0.64 
   5   8  -1    6.72    0.72 
   5   8  -1    6.17    0.64 
  -5   8   1    6.07    0.69 
  -4  -8   1    3.51    0.52 
   4  -8  -1    4.73    0.54 
   4  -8  -1    4.18    0.47 
  -4  -8   1    5.06    0.49 
   4  -8  -1    4.63    0.52 
   4   8  -1    3.72    0.51 
   4   8  -1    4.17    0.51 
   4   8  -1    4.51    0.49 
  -4   8   1    3.43    0.54 
  -3  -8   1    0.32    0.21 
   3  -8  -1    0.57    0.25 
   3  -8  -1    0.37    0.30 
   3  -8  -1   -0.12    0.29 
  -3  -8   1    0.02    0.31 
   3   8  -1   -0.15    0.29 
  -3   8   1    0.08    0.36 
   3   8  -1    0.38    0.28 
   3   8  -1    0.01    0.30 
  -3   8   1    0.39    0.18 
   2  -8  -1    2.55    0.41 
  -2  -8   1    3.26    0.37 
  -2  -8   1    3.72    0.47 
   2  -8  -1    3.47    0.42 
   2  -8  -1    3.43    0.44 
   2   8  -1    2.54    0.46 
  -2   8   1    3.50    0.50 
  -2   8   1    2.85    0.34 
   2   8  -1    2.52    0.40 
   2   8  -1    2.86    0.40 
  -1  -8   1   44.90    3.80 
   1  -8  -1   43.95    3.82 
   1  -8  -1   44.08    3.80 
   1  -8  -1   40.60    3.82 
  -1  -8   1   47.39    3.85 
   1   8  -1   44.23    3.80 
  -1   8   1   44.18    3.79 
   1   8  -1   43.29    3.81 
  -1   8   1   47.65    3.85 
   1   8  -1   49.51    3.85 
   0  -8  -1  109.19    9.58 
   0  -8  -1  117.89    9.61 
   0  -8   1  114.17    9.59 
   0  -8   1  113.73    9.61 
   0  -8  -1  113.12    9.60 
   0   8   1  111.02    9.59 
   0   8   1  122.62    9.63 
   0   8  -1  116.01    9.63 
   0   8  -1  114.33    9.59 
   0   8  -1  111.73    9.58 
   0   8   1  112.84    9.60 
  -1  -8  -1   39.35    3.18 
   1  -8   1   36.32    3.17 
  -1  -8  -1   37.25    3.15 
   1  -8   1   37.01    3.16 
   1   8   1   35.66    3.21 
  -1   8  -1   38.28    3.14 
   1   8   1   35.75    3.15 
   1   8   1   35.94    3.16 
  -2  -8  -1    0.15    0.24 
   2  -8   1    0.15    0.29 
  -2  -8  -1    0.36    0.31 
   2  -8   1    0.20    0.28 
   2   8   1    0.25    0.30 
  -2   8  -1    0.71    0.20 
  -2   8  -1    0.61    0.40 
   2   8   1    1.06    0.36 
   2   8   1    0.23    0.27 
  -3  -8  -1    0.51    0.22 
  -3  -8  -1    0.77    0.32 
   3  -8   1    0.70    0.27 
   3  -8   1    0.51    0.29 
  -3   8  -1   -0.18    0.38 
   3   8   1    0.37    0.31 
   3   8   1    0.86    0.29 
  -3   8  -1    0.41    0.16 
   3   8   1    0.54    0.28 
  -4  -8  -1   10.62    0.93 
   4  -8   1    9.85    0.98 
   4  -8   1    9.95    0.96 
   4   8   1    9.76    0.95 
   4   8   1    9.84    0.98 
   4   8   1    9.96    0.99 
  -4   8  -1    9.68    1.03 
  -5  -8  -1    0.42    0.23 
  -5  -8  -1    0.91    0.34 
   5  -8   1    0.18    0.29 
   5  -8   1   -0.36    0.30 
   5   8   1    0.37    0.32 
  -5   8  -1    0.64    0.36 
   5   8   1    0.15    0.30 
   5   8   1    0.46    0.27 
  -6  -8  -1    2.26    0.31 
   6  -8   1    1.21    0.35 
   6  -8   1    2.38    0.41 
  -6  -8  -1    1.93    0.42 
  -6   8  -1    1.71    0.44 
   6   8   1    2.70    0.41 
   6   8   1    1.62    0.37 
   6   8   1    1.87    0.36 
  -7  -8  -1    5.87    0.56 
   7  -8   1    3.92    0.55 
  -7  -8  -1    4.18    0.59 
   7  -8   1    3.95    0.56 
   7  -8   1    4.43    0.63 
   7   8   1    5.27    0.57 
   7   8   1    4.63    0.54 
  -7   8  -1    5.02    0.61 
   7   8   1    3.76    0.54 
   7   8   1    4.20    0.60 
   8  -8   1    2.04    0.42 
  -8  -8  -1    1.90    0.32 
  -8  -8  -1    1.57    0.44 
   8  -8   1    0.28    0.45 
   8  -8   1    1.78    0.42 
   8   8   1    2.34    0.42 
   8   8   1    1.19    0.39 
  -8   8  -1    0.99    0.45 
   8   8   1    1.99    0.38 
   8   8   1    1.59    0.49 
  -9  -8  -1    6.24    0.79 
   9  -8   1    7.31    0.76 
  -9  -8  -1    6.51    0.72 
   9  -8   1    6.41    0.77 
   9  -8   1    7.13    0.84 
  -9   8  -1    6.44    0.80 
   9   8   1    6.66    0.84 
   9   8   1    6.55    0.72 
   9   8   1    6.39    0.75 
   9   8   1    6.16    0.74 
 -10  -8  -1    6.37    0.65 
  10  -8   1    5.21    0.80 
  10  -8   1    6.43    0.75 
  10  -8   1    6.13    0.76 
 -10  -8  -1    5.82    0.78 
  10   8   1    5.55    0.82 
  10   8   1    6.64    0.72 
  10   8   1    4.53    0.72 
  10   8   1    5.92    0.69 
 -10   8  -1    6.63    0.80 
 -11  -8  -1    5.79    0.66 
  11  -8   1    6.86    0.79 
  11  -8   1    6.31    0.88 
  11  -8   1    5.53    0.78 
 -11  -8  -1    5.27    0.80 
  11   8   1    6.25    0.72 
 -11   8  -1    5.98    0.82 
  11   8   1    5.96    0.75 
  11   8   1    6.54    0.78 
 -11   8  -1    6.33    0.77 
  11   8   1    4.55    0.85 
  12  -8   1    1.06    0.66 
  12  -8   1    1.01    0.52 
 -12  -8  -1    0.82    0.57 
  12  -8   1    0.23    0.53 
  12   8   1    0.89    0.67 
  12   8   1    0.38    0.44 
 -12   8  -1    0.17    0.48 
 -12   8  -1    1.17    0.58 
  12   8   1    0.45    0.48 
 -13  -8  -1   -0.40    0.58 
  13  -8   1   -0.17    0.58 
  13  -8   1    0.13    0.70 
 -13   8  -1   -0.60    0.46 
  13   8   1    0.66    0.70 
  13   8   1    0.19    0.50 
  13   8   1    0.43    0.45 
 -13   8  -1    0.63    0.62 
  14  -8   1    0.37    0.63 
  14  -8   1    0.06    0.73 
 -14  -8  -1    1.20    0.70 
  14   8   1    0.95    0.52 
 -14   8  -1    0.36    0.53 
  14   8   1    1.15    0.57 
 -14   8  -1    0.57    0.64 
 -15  -8  -1    1.27    0.75 
  15  -8   1    2.75    0.76 
 -15   8  -1    3.09    0.65 
 -15   8  -1    3.21    0.65 
  15   8   1    1.68    0.68 
  15   8   1    2.07    0.60 
 -16  -8  -1    5.89    1.08 
  16  -8   1    6.99    1.12 
  16   8   1    9.68    1.00 
  16   8   1    7.54    1.00 
 -16   8  -1    6.62    1.02 
 -16   8  -1    8.42    0.99 
 -16  -9   1   -0.09    0.76 
 -16   9   1    0.79    0.57 
  16   9  -1    0.43    0.61 
  16   9  -1    0.22    0.62 
 -15  -9   1    0.00    0.73 
  15   9  -1    0.11    0.56 
 -15   9   1    2.19    0.77 
  15   9  -1   -0.05    0.61 
 -15   9   1    1.28    0.56 
  14  -9  -1    0.81    0.65 
 -14  -9   1    1.35    0.71 
  14  -9  -1    1.14    0.80 
 -14   9   1    2.34    0.74 
 -14   9   1    2.17    0.60 
  14   9  -1    1.98    0.59 
  14   9  -1    2.69    0.64 
 -13  -9   1    6.22    0.95 
  13  -9  -1    6.56    0.90 
  13  -9  -1    8.10    1.09 
  13  -9  -1    7.96    0.93 
 -13   9   1    5.91    0.85 
 -13   9   1    6.46    0.98 
  13   9  -1    6.88    0.83 
  13   9  -1    6.98    0.89 
  12  -9  -1    5.25    0.81 
 -12  -9   1    6.06    0.89 
  12  -9  -1    6.77    0.97 
  12  -9  -1    7.26    0.87 
  12   9  -1    6.83    0.87 
 -12   9   1    6.42    0.82 
  12   9  -1    6.13    0.82 
  12   9  -1    6.81    0.79 
 -12   9   1    5.91    0.90 
  11  -9  -1    1.71    0.67 
  11  -9  -1    1.37    0.53 
 -11  -9   1    1.59    0.59 
  11  -9  -1    1.25    0.52 
 -11   9   1    2.56    0.60 
  11   9  -1    1.30    0.45 
  11   9  -1    1.55    0.50 
  11   9  -1    1.68    0.55 
 -10  -9   1    1.25    0.55 
  10  -9  -1    0.91    0.48 
  10  -9  -1    1.47    0.60 
 -10  -9   1    2.33    0.38 
  10  -9  -1    2.47    0.53 
  10   9  -1    2.83    0.52 
 -10   9   1    1.29    0.59 
  10   9  -1    1.54    0.51 
  10   9  -1    2.16    0.45 
   9  -9  -1   10.10    1.10 
  -9  -9   1    9.98    0.95 
   9  -9  -1    9.27    1.05 
  -9  -9   1   10.20    1.06 
   9  -9  -1    9.71    1.09 
   9   9  -1   10.46    1.07 
  -9   9   1   10.10    1.08 
   9   9  -1    9.21    1.09 
   9   9  -1    9.95    1.04 
   8  -9  -1    1.97    0.43 
   8  -9  -1    1.81    0.51 
  -8  -9   1    1.79    0.49 
   8  -9  -1    3.03    0.56 
   8  -9  -1    2.61    0.48 
  -8  -9   1    2.46    0.35 
  -8   9   1    1.62    0.52 
   8   9  -1    2.23    0.47 
   8   9  -1    2.32    0.43 
   8   9  -1    2.75    0.47 
  -7  -9   1    1.75    0.28 
   7  -9  -1    1.16    0.34 
   7  -9  -1    0.91    0.46 
   7  -9  -1    2.23    0.46 
   7  -9  -1    0.99    0.40 
  -7  -9   1    0.95    0.42 
   7   9  -1    0.45    0.37 
  -7   9   1    0.80    0.42 
   7   9  -1    2.07    0.41 
   7   9  -1    1.54    0.35 
  -6  -9   1   12.26    1.20 
   6  -9  -1   11.67    1.15 
  -6  -9   1   12.30    1.09 
   6  -9  -1   13.06    1.23 
   6  -9  -1   11.67    1.19 
   6  -9  -1   12.40    1.19 
   6   9  -1   11.81    1.16 
   6   9  -1   12.04    1.14 
   6   9  -1   11.62    1.17 
  -6   9   1   12.54    1.21 
  -5  -9   1    1.02    0.24 
   5  -9  -1    0.74    0.28 
  -5  -9   1    0.47    0.35 
   5  -9  -1    0.13    0.36 
   5  -9  -1    0.67    0.34 
   5   9  -1    0.39    0.33 
   5   9  -1    0.36    0.33 
   5   9  -1    1.07    0.30 
  -5   9   1    0.45    0.38 
   4  -9  -1   19.96    1.80 
  -4  -9   1   20.90    1.72 
   4  -9  -1   21.71    1.76 
  -4  -9   1   19.24    1.79 
   4  -9  -1   20.09    1.78 
   4   9  -1   19.40    1.78 
   4   9  -1   19.60    1.77 
  -4   9   1   20.35    1.81 
  -4   9   1   19.24    1.71 
   4   9  -1   18.72    1.75 
   3  -9  -1   -0.46    0.31 
   3  -9  -1    0.02    0.26 
  -3  -9   1    0.14    0.33 
   3  -9  -1   -0.24    0.30 
  -3  -9   1   -0.19    0.21 
   3   9  -1   -0.17    0.29 
   3   9  -1   -0.32    0.34 
  -3   9   1    0.39    0.19 
  -3   9   1    0.21    0.38 
   3   9  -1   -0.09    0.28 
   2  -9  -1    2.79    0.42 
  -2  -9   1    2.59    0.46 
   2  -9  -1    2.87    0.41 
  -2  -9   1    3.17    0.38 
   2  -9  -1    2.31    0.43 
  -2   9   1    3.11    0.35 
  -2   9   1    2.28    0.49 
   2   9  -1    2.96    0.41 
   2   9  -1    2.98    0.49 
   2   9  -1    3.27    0.41 
   1  -9  -1   43.36    4.03 
  -1  -9   1   47.99    4.01 
   1  -9  -1   48.19    4.03 
  -1  -9   1   48.56    4.07 
   1  -9  -1   48.76    4.01 
   1   9  -1   44.95    4.01 
   1   9  -1   45.73    4.02 
  -1   9   1   47.63    4.01 
  -1   9   1   48.26    4.07 
   1   9  -1   50.28    4.07 
   0  -9  -1   23.90    2.17 
   0  -9  -1   26.52    2.22 
   0  -9  -1   25.94    2.25 
   0  -9   1   25.26    2.20 
   0  -9   1   24.69    2.24 
   0   9   1   27.68    2.29 
   0   9  -1   25.00    2.21 
   0   9   1   24.67    2.19 
   0   9   1   27.13    2.22 
   0   9  -1   23.79    2.18 
   0   9  -1   26.01    2.27 
  -1  -9  -1  158.52   12.36 
  -1  -9  -1  151.88   12.34 
   1  -9   1  146.19   12.35 
   1  -9   1  147.50   12.34 
  -1   9  -1  157.88   12.38 
  -1   9  -1  141.64   12.33 
   1   9   1  136.30   12.34 
   1   9   1  127.53   12.34 
   1   9   1  156.61   12.37 
   2  -9   1    0.32    0.31 
   2  -9   1   -0.17    0.28 
  -2  -9  -1    0.22    0.25 
  -2  -9  -1    0.48    0.32 
   2   9   1   -0.12    0.39 
  -2   9  -1   -0.02    0.21 
   2   9   1    0.42    0.31 
   2   9   1    0.31    0.32 
  -2   9  -1   -0.41    0.42 
   3  -9   1    0.96    0.29 
  -3  -9  -1    0.55    0.33 
  -3  -9  -1    0.97    0.25 
   3  -9   1    0.67    0.33 
   3   9   1    0.46    0.33 
   3   9   1    0.52    0.34 
  -3   9  -1    0.57    0.18 
  -3   9  -1    0.28    0.41 
   3   9   1    0.53    0.29 
   4  -9   1   -0.03    0.30 
  -4  -9  -1    0.04    0.24 
   4  -9   1    0.57    0.29 
  -4  -9  -1    0.08    0.32 
   4   9   1    0.11    0.28 
   4   9   1    0.61    0.33 
   4   9   1   -0.10    0.31 
  -4   9  -1    0.05    0.39 
  -4   9  -1   -0.35    0.16 
  -5  -9  -1  281.00   23.18 
   5  -9   1  275.00   23.19 
  -5  -9  -1  278.86   23.21 
   5  -9   1  281.18   23.21 
   5   9   1  274.73   23.20 
  -5   9  -1  276.03   23.22 
   5   9   1  270.55   23.19 
   5   9   1  275.85   23.20 
  -6  -9  -1    0.75    0.24 
  -6  -9  -1   -0.23    0.36 
   6  -9   1    0.79    0.35 
   6  -9   1   -0.15    0.31 
   6   9   1    0.45    0.32 
  -6   9  -1    0.38    0.39 
   6   9   1    0.40    0.30 
   6   9   1    0.74    0.34 
  -7  -9  -1   -0.02    0.38 
   7  -9   1    0.13    0.34 
  -7  -9  -1    0.45    0.26 
   7  -9   1   -0.02    0.37 
  -7   9  -1    0.04    0.39 
   7   9   1    0.07    0.36 
   7   9   1    0.24    0.34 
   7   9   1    0.63    0.31 
   8  -9   1    2.80    0.50 
   8  -9   1    3.41    0.53 
  -8  -9  -1    2.85    0.54 
  -8  -9  -1    3.48    0.42 
   8   9   1    2.65    0.50 
  -8   9  -1    3.58    0.58 
   8   9   1    2.72    0.51 
   8   9   1    3.95    0.49 
   9  -9   1    6.46    0.73 
   9  -9   1    5.61    0.74 
   9  -9   1    4.80    0.78 
  -9  -9  -1    5.40    0.75 
  -9  -9  -1    6.56    0.69 
   9   9   1    6.71    0.70 
   9   9   1    6.13    0.73 
  -9   9  -1    6.28    0.80 
   9   9   1    6.08    0.74 
 -10  -9  -1    0.44    0.31 
  10  -9   1   -0.12    0.45 
 -10  -9  -1    0.46    0.49 
  10  -9   1    0.10    0.55 
  10  -9   1    0.33    0.46 
  10   9   1   -0.32    0.44 
  10   9   1   -0.01    0.44 
  10   9   1    0.33    0.37 
 -10   9  -1   -0.07    0.48 
  11  -9   1    7.54    0.81 
  11  -9   1    4.93    0.76 
  11  -9   1    5.18    0.85 
 -11  -9  -1    5.18    0.65 
 -11  -9  -1    5.72    0.83 
  11   9   1    7.03    0.78 
  11   9   1    6.17    0.77 
 -11   9  -1    5.39    0.77 
  11   9   1    5.66    0.72 
 -11   9  -1    6.28    0.84 
  12  -9   1    0.49    0.53 
 -12  -9  -1   -0.07    0.57 
  12  -9   1   -0.41    0.63 
  12  -9   1    0.23    0.54 
  12   9   1    0.87    0.50 
 -12   9  -1    1.58    0.61 
  12   9   1    0.06    0.45 
 -12   9  -1   -0.24    0.47 
  13  -9   1    0.17    0.58 
 -13  -9  -1    0.42    0.65 
  13   9   1    0.57    0.53 
  13   9   1   -0.24    0.47 
 -13   9  -1    0.95    0.66 
 -13   9  -1    0.83    0.51 
 -14  -9  -1   -0.52    0.66 
  14  -9   1    1.45    0.66 
  14   9   1   -0.56    0.54 
 -14   9  -1   -0.45    0.68 
  14   9   1    0.02    0.49 
 -14   9  -1   -0.80    0.50 
 -15  -9  -1    0.10    0.72 
  15  -9   1    0.39    0.69 
 -15   9  -1    1.37    0.59 
 -15   9  -1    0.14    0.55 
  15   9   1    0.78    0.60 
  15   9   1    0.03    0.55 
 -15   9  -1    0.67    1.10 
 -16  -9  -1    0.36    0.76 
  16   9   1   -0.50    0.55 
 -16   9  -1    1.20    0.61 
  16   9   1    1.16    0.67 
 -16 -10   1    2.42    0.90 
  16  10  -1    3.72    0.79 
  16  10  -1    3.44    0.73 
 -16  10   1    3.85    0.73 
 -15 -10   1   -0.34    0.72 
 -15  10   1    0.69    0.77 
  15  10  -1    0.37    0.62 
  15  10  -1   -0.50    0.54 
 -15  10   1    0.37    0.57 
 -14 -10   1    2.32    0.81 
  14 -10  -1    1.49    0.70 
  14  10  -1    3.10    0.64 
  14  10  -1    3.10    0.71 
 -14  10   1    3.03    0.66 
 -14  10   1    3.39    0.83 
 -13 -10   1    8.24    1.16 
  13 -10  -1    9.66    1.10 
  13 -10  -1    9.92    1.24 
  13 -10  -1   10.10    1.10 
  13  10  -1    9.27    1.08 
  13  10  -1    9.62    1.04 
 -13  10   1    9.09    1.07 
 -13  10   1   10.01    1.19 
  12 -10  -1    0.23    0.70 
  12 -10  -1    0.33    0.54 
 -12 -10   1    1.16    0.62 
  12 -10  -1    0.19    0.51 
 -12  10   1    1.75    0.67 
  12  10  -1    0.35    0.51 
  12  10  -1    1.75    0.62 
  12  10  -1    0.72    0.46 
 -12  10   1    0.77    0.51 
  11 -10  -1    3.60    0.65 
  11 -10  -1    2.47    0.77 
  11 -10  -1    4.62    0.68 
 -11 -10   1    3.49    0.71 
  11  10  -1    3.75    0.66 
  11  10  -1    4.72    0.67 
  11  10  -1    4.75    0.61 
 -11  10   1    3.12    0.74 
 -10 -10   1    5.47    0.60 
  10 -10  -1    5.01    0.70 
  10 -10  -1    5.82    0.75 
 -10 -10   1    5.06    0.76 
  10 -10  -1    5.17    0.83 
  10  10  -1    6.55    0.70 
 -10  10   1    5.81    0.80 
  10  10  -1    5.07    0.72 
  10  10  -1    4.90    0.72 
   9 -10  -1    6.98    0.88 
   9 -10  -1    9.87    0.98 
  -9 -10   1    7.53    0.91 
  -9 -10   1    6.90    0.80 
   9 -10  -1    8.24    0.85 
   9  10  -1    6.67    0.82 
   9  10  -1    6.48    0.85 
  -9  10   1    8.39    0.94 
   9  10  -1   10.16    0.95 
   8 -10  -1    0.67    0.36 
   8 -10  -1   -0.04    0.51 
  -8 -10   1    0.50    0.26 
  -8 -10   1   -0.35    0.43 
   8 -10  -1   -0.40    0.40 
   8  10  -1    0.38    0.40 
   8  10  -1    0.22    0.35 
   8  10  -1   -0.04    0.40 
  -8  10   1    0.18    0.48 
   7 -10  -1   17.44    1.56 
   7 -10  -1   17.80    1.62 
  -7 -10   1   16.60    1.51 
  -7 -10   1   16.31    1.61 
   7 -10  -1   17.57    1.61 
   7  10  -1   17.40    1.58 
   7  10  -1   16.32    1.58 
  -7  10   1   16.58    1.63 
   7  10  -1   18.62    1.57 
   6 -10  -1   18.00    1.67 
   6 -10  -1   16.28    1.63 
   6 -10  -1   20.64    1.69 
  -6 -10   1   18.85    1.59 
  -6 -10   1   18.54    1.68 
  -6  10   1   15.72    1.69 
   6  10  -1   18.14    1.67 
   6  10  -1   18.19    1.64 
   6  10  -1   19.89    1.67 
  -5 -10   1   -0.14    0.34 
   5 -10  -1    0.46    0.37 
   5 -10  -1   -0.13    0.28 
  -5 -10   1    0.37    0.22 
   5 -10  -1    0.09    0.34 
   5  10  -1   -0.60    0.28 
   5  10  -1    0.40    0.35 
   5  10  -1   -0.22    0.29 
  -5  10   1   -0.03    0.41 
   4 -10  -1   21.02    1.86 
  -4 -10   1   20.08    1.80 
  -4 -10   1   19.80    1.87 
   4 -10  -1   21.64    1.82 
   4 -10  -1   20.20    1.85 
   4  10  -1   21.64    1.85 
   4  10  -1   21.21    1.83 
  -4  10   1   20.79    1.79 
  -4  10   1   21.56    1.89 
   4  10  -1   19.80    1.85 
   3 -10  -1    0.02    0.32 
  -3 -10   1    0.67    0.36 
   3 -10  -1    0.49    0.32 
   3 -10  -1    0.28    0.29 
  -3 -10   1   -0.14    0.24 
  -3  10   1    0.13    0.20 
   3  10  -1   -0.03    0.29 
   3  10  -1    0.46    0.39 
  -3  10   1    0.11    0.41 
   3  10  -1   -0.18    0.30 
   2 -10  -1    0.57    0.34 
  -2 -10   1    0.66    0.41 
   2 -10  -1    0.57    0.31 
   2 -10  -1    0.27    0.30 
  -2 -10   1    0.22    0.27 
   2  10  -1    0.63    0.30 
   2  10  -1   -0.06    0.43 
  -2  10   1   -0.09    0.23 
  -2  10   1    0.21    0.42 
   2  10  -1    0.37    0.30 
  -1 -10   1    3.62    0.45 
  -1 -10   1    3.00    0.56 
   1 -10  -1    2.74    0.49 
   1 -10  -1    3.10    0.48 
   1 -10  -1    3.88    0.43 
   1  10  -1    3.68    0.48 
   1  10  -1    4.03    0.44 
  -1  10   1    2.94    0.57 
   1  10  -1    3.11    0.59 
  -1  10   1    3.81    0.43 
   0 -10  -1  187.37   14.89 
   0 -10  -1  166.89   14.85 
   0 -10   1  176.62   14.89 
   0 -10   1  176.75   14.87 
   0 -10  -1  181.43   14.87 
   0  10   1  191.85   14.91 
   0  10   1  166.16   14.86 
   0  10   1  177.09   14.87 
   0  10  -1  165.87   14.85 
   0  10  -1  189.46   14.91 
   0  10  -1  170.99   14.87 
   1 -10   1    7.51    0.85 
   1 -10   1    7.00    0.82 
  -1 -10  -1    6.86    0.78 
  -1 -10  -1    8.66    0.85 
   1  10   1    7.14    0.87 
  -1  10  -1    9.59    0.80 
   1  10   1    8.73    0.83 
   1  10   1    8.86    0.87 
  -1  10  -1    7.63    0.90 
   2 -10   1   67.02    5.30 
  -2 -10  -1   62.35    5.30 
   2 -10   1   62.34    5.29 
  -2 -10  -1   61.71    5.28 
  -2  10  -1   63.33    5.26 
   2  10   1   60.09    5.29 
  -2  10  -1   60.80    5.33 
   2  10   1   61.62    5.29 
   2  10   1   62.37    5.32 
  -3 -10  -1   -0.45    0.33 
  -3 -10  -1   -0.01    0.24 
   3 -10   1   -0.04    0.33 
   3 -10   1    0.40    0.29 
   3  10   1   -0.51    0.31 
   3  10   1    0.70    0.37 
  -3  10  -1   -0.10    0.42 
   3  10   1    0.10    0.32 
  -3  10  -1    0.05    0.19 
  -4 -10  -1   15.29    1.37 
   4 -10   1   14.73    1.37 
   4 -10   1   15.53    1.34 
  -4 -10  -1   14.51    1.31 
  -4  10  -1   15.04    1.42 
   4  10   1   14.58    1.34 
   4  10   1   14.38    1.36 
  -4  10  -1   13.27    1.27 
   4  10   1   15.61    1.37 
  -5 -10  -1   29.06    2.55 
   5 -10   1   30.48    2.55 
  -5 -10  -1   28.62    2.50 
   5 -10   1   27.81    2.52 
   5  10   1   27.97    2.54 
  -5  10  -1   29.31    2.58 
  -5  10  -1   29.36    2.47 
   5  10   1   28.46    2.52 
   5  10   1   31.19    2.53 
   6 -10   1    6.90    0.76 
  -6 -10  -1    6.67    0.80 
  -6 -10  -1    8.20    0.75 
   6 -10   1    8.49    0.82 
   6  10   1    6.66    0.77 
  -6  10  -1    7.49    0.85 
   6  10   1    8.14    0.81 
   6  10   1    7.26    0.79 
  -7 -10  -1    1.21    0.30 
  -7 -10  -1    1.60    0.45 
   7 -10   1    1.48    0.42 
   7 -10   1    1.34    0.37 
  -7  10  -1    1.59    0.48 
   7  10   1    1.90    0.41 
   7  10   1    1.09    0.42 
   7  10   1    1.00    0.36 
  -8 -10  -1   -0.01    0.43 
   8 -10   1    0.08    0.40 
   8 -10   1    0.55    0.38 
  -8 -10  -1    0.18    0.28 
   8  10   1    0.29    0.39 
  -8  10  -1    0.15    0.48 
   8  10   1    0.24    0.40 
   8  10   1    0.53    0.34 
   9 -10   1   10.89    1.22 
   9 -10   1   11.91    1.17 
  -9 -10  -1   11.76    1.07 
  -9 -10  -1   10.22    1.14 
   9  10   1   11.78    1.14 
   9  10   1   11.64    1.14 
   9  10   1   10.27    1.17 
  -9  10  -1    9.52    1.16 
 -10 -10  -1    6.38    0.87 
  10 -10   1    6.47    0.82 
  10 -10   1    7.65    0.86 
 -10 -10  -1    7.65    0.80 
 -10  10  -1    6.16    0.90 
  10  10   1    7.41    0.80 
  10  10   1    7.88    0.86 
  10  10   1    6.53    0.82 
 -11 -10  -1    1.10    0.58 
  11 -10   1    1.05    0.55 
  11 -10   1    1.58    0.53 
 -11  10  -1    1.09    0.63 
  11  10   1    1.29    0.46 
  11  10   1    1.41    0.53 
  11  10   1    1.38    0.52 
  12 -10   1   -0.45    0.54 
  12 -10   1    0.33    0.53 
 -12 -10  -1    0.44    0.60 
 -12  10  -1    0.50    0.63 
 -12  10  -1    1.16    0.53 
  12  10   1   -0.41    0.50 
  12  10   1    0.58    0.44 
  13 -10   1    1.06    0.61 
 -13 -10  -1    0.40    0.64 
  13 -10   1    0.19    0.58 
  13  10   1    0.74    0.55 
 -13  10  -1    0.31    0.55 
  13  10   1    0.20    0.46 
 -13  10  -1    0.24    0.68 
 -14 -10  -1    0.05    0.72 
  14 -10   1    1.03    0.66 
 -14  10  -1   -0.19    0.54 
  14  10   1    0.70    0.58 
  14  10   1    0.48    0.53 
 -14  10  -1    1.27    0.73 
 -15 -10  -1   -0.18    0.73 
  15 -10   1    0.78    0.71 
  15  10   1    0.74    0.62 
 -15  10  -1    0.55    0.78 
 -15  10  -1    0.87    0.57 
  15  10   1    1.11    0.56 
 -16 -10  -1    7.32    1.17 
  16  10   1    9.75    1.11 
  16  10   1    8.46    1.03 
 -16  10  -1    7.22    1.03 
 -16 -11   1    0.43    0.82 
  16  11  -1    1.03    0.65 
 -16  11   1    1.82    0.64 
  16  11  -1    2.53    0.78 
 -15 -11   1   -0.37    0.74 
 -15  11   1    0.26    0.55 
  15  11  -1    0.59    0.59 
  15  11  -1    0.15    0.63 
 -15  11   1    1.32    0.83 
 -14 -11   1    5.64    0.99 
  14 -11  -1    5.85    0.89 
 -14  11   1    5.80    1.01 
 -14  11   1    5.05    0.84 
  14  11  -1    6.64    0.83 
  14  11  -1    6.11    0.88 
  13 -11  -1    8.03    1.06 
 -13 -11   1    9.21    1.13 
  13 -11  -1    8.45    1.05 
 -13  11   1    9.31    1.17 
  13  11  -1    9.07    1.00 
 -13  11   1    7.75    1.03 
  13  11  -1    8.78    1.04 
 -12 -11   1    2.71    0.72 
  12 -11  -1    2.47    0.61 
  12 -11  -1    2.02    0.64 
 -12  11   1    2.38    0.76 
  12  11  -1    2.15    0.60 
  12  11  -1    2.43    0.55 
 -11 -11   1    0.04    0.56 
  11 -11  -1    0.73    0.53 
  11 -11  -1    0.01    0.48 
  11  11  -1    0.54    0.52 
 -11  11   1    0.12    0.62 
  11  11  -1    1.04    0.50 
  11  11  -1   -0.19    0.43 
  10 -11  -1    4.56    0.71 
 -10 -11   1    4.01    0.74 
  10 -11  -1    4.95    0.67 
  10  11  -1    5.79    0.66 
 -10  11   1    3.93    0.78 
  10  11  -1    4.14    0.70 
  10  11  -1    5.68    0.71 
  -9 -11   1    6.98    0.93 
   9 -11  -1    8.27    0.87 
   9 -11  -1    8.56    0.92 
  -9 -11   1    8.74    0.82 
  -9  11   1    9.11    0.97 
   9  11  -1    7.90    0.90 
   9  11  -1    7.15    0.88 
   9  11  -1    6.44    0.85 
   8 -11  -1    2.92    0.49 
  -8 -11   1    2.51    0.57 
   8 -11  -1    3.76    0.57 
  -8 -11   1    3.58    0.42 
   8  11  -1    3.14    0.54 
  -8  11   1    2.45    0.63 
   8  11  -1    3.06    0.53 
   8  11  -1    2.69    0.50 
   7 -11  -1   10.81    1.17 
  -7 -11   1   12.09    1.18 
   7 -11  -1   11.03    1.10 
   7 -11  -1   11.62    1.18 
  -7 -11   1   11.31    1.04 
  -7  11   1   10.98    1.21 
   7  11  -1   11.28    1.11 
   7  11  -1   11.40    1.14 
   7  11  -1   10.23    1.14 
   6 -11  -1    6.68    0.66 
  -6 -11   1    4.16    0.62 
   6 -11  -1    4.91    0.63 
  -6 -11   1    5.39    0.52 
   6 -11  -1    4.51    0.56 
   6  11  -1    5.07    0.59 
  -6  11   1    3.59    0.66 
   6  11  -1    3.51    0.60 
   6  11  -1    5.74    0.63 
   5 -11  -1    7.59    0.77 
   5 -11  -1    6.92    0.76 
  -5 -11   1    6.27    0.68 
   5 -11  -1    6.33    0.69 
  -5 -11   1    6.06    0.74 
  -5  11   1    7.51    0.66 
   5  11  -1    5.90    0.73 
   5  11  -1    6.45    0.70 
  -5  11   1    6.03    0.77 
   5  11  -1    6.93    0.72 
   4 -11  -1   30.19    2.56 
   4 -11  -1   28.15    2.57 
  -4 -11   1   29.46    2.58 
   4 -11  -1   29.81    2.54 
  -4 -11   1   28.97    2.51 
   4  11  -1   28.47    2.57 
  -4  11   1   29.48    2.60 
   4  11  -1   28.26    2.54 
   4  11  -1   29.30    2.55 
  -4  11   1   30.55    2.50 
   3 -11  -1   17.40    1.60 
   3 -11  -1   18.93    1.63 
   3 -11  -1   20.20    1.60 
  -3 -11   1   17.69    1.57 
  -3 -11   1   17.66    1.65 
   3  11  -1   16.38    1.61 
  -3  11   1   17.73    1.67 
   3  11  -1   18.67    1.65 
  -3  11   1   16.91    1.54 
   3  11  -1   16.68    1.59 
   2 -11  -1   70.36    5.90 
  -2 -11   1   71.68    5.94 
   2 -11  -1   69.82    5.93 
   2 -11  -1   69.50    5.91 
  -2 -11   1   70.26    5.90 
   2  11  -1   73.06    5.95 
   2  11  -1   66.45    5.90 
  -2  11   1   67.32    5.89 
  -2  11   1   70.25    5.95 
   2  11  -1   70.62    5.91 
   1 -11  -1   20.91    2.08 
   1 -11  -1   23.62    2.06 
  -1 -11   1   24.50    2.12 
   1 -11  -1   24.15    2.03 
  -1 -11   1   23.73    2.04 
   1  11  -1   23.00    2.03 
   1  11  -1   22.53    2.05 
  -1  11   1   22.54    2.03 
  -1  11   1   24.45    2.14 
   1  11  -1   24.60    2.14 
   0 -11  -1    5.29    0.63 
   0 -11   1    4.45    0.63 
   0 -11  -1    5.45    0.58 
   0 -11   1    4.44    0.56 
   0  11  -1    4.89    0.58 
   0  11  -1    5.01    0.70 
   0  11   1    4.27    0.69 
   0  11   1    4.81    0.55 
   0  11   1    5.19    0.60 
   0  11  -1    4.69    0.53 
  -1 -11  -1    5.17    0.64 
  -1 -11  -1    5.03    0.55 
   1 -11   1    4.29    0.56 
   1 -11   1    4.02    0.61 
  -1  11  -1    4.32    0.68 
   1  11   1    4.18    0.54 
   1  11   1    4.66    0.70 
  -1  11  -1    5.01    0.52 
  -1  11  -1    5.02    0.56 
   1  11   1    5.47    0.60 
   2 -11   1   58.63    4.92 
  -2 -11  -1   58.62    4.91 
  -2 -11  -1   60.21    4.94 
   2 -11   1   62.89    4.93 
   2  11   1   62.50    4.96 
  -2  11  -1   62.91    4.98 
   2  11   1   52.00    4.92 
  -2  11  -1   53.15    4.89 
   2  11   1   52.73    4.91 
  -3 -11  -1    0.02    0.27 
  -3 -11  -1    0.78    0.37 
   3 -11   1   -0.05    0.34 
   3 -11   1    0.18    0.32 
  -3  11  -1    0.75    0.47 
  -3  11  -1    0.72    0.22 
   3  11   1    0.89    0.42 
   3  11   1    0.15    0.33 
   3  11   1    0.61    0.34 
   4 -11   1   34.02    2.78 
  -4 -11  -1   31.93    2.75 
   4 -11   1   32.58    2.80 
  -4 -11  -1   34.37    2.81 
   4  11   1   35.24    2.81 
  -4  11  -1   29.12    2.72 
  -4  11  -1   34.48    2.84 
   4  11   1   27.48    2.77 
   4  11   1   32.69    2.78 
   5 -11   1  122.29   10.28 
  -5 -11  -1  117.98   10.30 
   5 -11   1  119.70   10.29 
  -5 -11  -1  124.09   10.26 
   5  11   1  124.74   10.28 
  -5  11  -1  126.54   10.25 
  -5  11  -1  119.35   10.31 
   5  11   1  119.19   10.29 
   5  11   1  124.56   10.29 
   6 -11   1   14.32    1.41 
   6 -11   1   13.08    1.36 
  -6 -11  -1   13.93    1.41 
  -6 -11  -1   15.92    1.33 
  -6  11  -1   14.19    1.45 
   6  11   1   15.78    1.36 
   6  11   1   13.49    1.37 
   6  11   1   16.15    1.40 
   7 -11   1   10.09    1.06 
  -7 -11  -1    8.73    1.04 
  -7 -11  -1   11.43    0.99 
   7 -11   1   11.48    1.11 
   7  11   1   10.43    1.05 
  -7  11  -1   11.16    1.16 
   7  11   1    9.53    1.08 
   7  11   1   10.13    1.06 
  -8 -11  -1    4.35    0.52 
   8 -11   1    4.41    0.63 
   8 -11   1    3.96    0.60 
  -8 -11  -1    4.37    0.65 
   8  11   1    4.54    0.59 
  -8  11  -1    3.65    0.71 
   8  11   1    5.39    0.61 
   8  11   1    4.69    0.63 
  -9 -11  -1    0.27    0.52 
   9 -11   1    0.75    0.47 
   9 -11   1    1.55    0.46 
  -9 -11  -1    0.98    0.34 
   9  11   1    0.71    0.43 
   9  11   1    0.92    0.47 
   9  11   1    1.41    0.42 
  -9  11  -1    1.46    0.60 
  10 -11   1    9.52    1.01 
 -10 -11  -1    7.94    1.06 
 -10 -11  -1   10.70    0.97 
  10 -11   1    9.13    1.04 
  10  11   1    8.23    1.00 
  10  11   1    9.97    0.99 
  10  11   1   10.31    1.04 
 -10  11  -1    8.94    1.09 
 -11 -11  -1    3.16    0.71 
  11 -11   1    3.38    0.65 
  11 -11   1    4.42    0.69 
  11  11   1    4.06    0.68 
 -11  11  -1    3.33    0.78 
  11  11   1    3.65    0.61 
  11  11   1    4.21    0.67 
  12 -11   1    0.72    0.57 
  12 -11   1   -0.15    0.54 
 -12 -11  -1   -0.60    0.61 
  12  11   1    1.16    0.56 
  12  11   1    0.71    0.47 
 -12  11  -1   -0.10    0.68 
 -12  11  -1    0.16    0.51 
  13 -11   1    1.45    0.64 
 -13 -11  -1    2.09    0.72 
  13 -11   1    1.54    0.61 
 -13  11  -1    0.97    0.75 
 -13  11  -1    0.99    0.58 
  13  11   1    1.06    0.53 
  13  11   1    0.87    0.60 
  14 -11   1   -0.27    0.66 
 -14 -11  -1    0.62    0.73 
 -14  11  -1   -0.10    0.56 
  14  11   1   -0.58    0.58 
  14  11   1   -0.20    0.52 
 -14  11  -1    1.15    0.79 
 -15 -11  -1   -0.04    0.79 
  15  11   1    1.05    0.58 
 -15  11  -1   -0.87    0.59 
  15  11   1    0.43    0.66 
 -15  11  -1    2.04    0.84 
 -16 -11  -1    1.83    0.90 
  16  11   1    0.47    0.68 
  16  11   1    1.29    0.63 
 -16  11  -1    0.74    0.62 
 -15 -12   1    0.61    0.84 
  15  12  -1    0.52    0.60 
  15  12  -1   -0.16    0.62 
 -15  12   1    0.06    0.60 
 -15  12   1    1.12    0.87 
 -14 -12   1    0.69    0.78 
  14 -12  -1    3.11    0.73 
  14  12  -1    2.21    0.63 
 -14  12   1    2.50    0.84 
 -14  12   1    2.04    0.66 
  14  12  -1    2.04    0.71 
  13 -12  -1   39.14    3.44 
 -13 -12   1   35.76    3.47 
  13 -12  -1   39.22    3.41 
  13  12  -1   39.25    3.37 
 -13  12   1   38.75    3.50 
  13  12  -1   38.63    3.39 
 -13  12   1   35.12    3.40 
 -12 -12   1    2.73    0.78 
  12 -12  -1    3.79    0.68 
  12 -12  -1    3.35    0.71 
  12  12  -1    4.57    0.71 
  12  12  -1    4.30    0.64 
 -12  12   1    1.95    0.83 
 -11 -12   1    3.66    0.72 
  11 -12  -1    2.45    0.62 
  11 -12  -1    2.37    0.66 
  11  12  -1    3.30    0.58 
  11  12  -1    2.67    0.62 
  11  12  -1    3.82    0.64 
 -11  12   1    3.28    0.74 
  10 -12  -1    1.36    0.56 
 -10 -12   1    0.44    0.59 
  10 -12  -1    1.43    0.50 
  10  12  -1    2.47    0.56 
  10  12  -1    2.36    0.51 
 -10  12   1    1.08    0.64 
  10  12  -1    2.31    0.56 
  -9 -12   1   37.58    3.33 
  -9 -12   1   36.28    3.22 
   9 -12  -1   38.23    3.28 
   9 -12  -1   39.40    3.32 
   9  12  -1   37.64    3.29 
   9  12  -1   38.35    3.31 
  -9  12   1   38.27    3.35 
   9  12  -1   36.27    3.30 
  -8 -12   1   10.88    1.26 
   8 -12  -1   12.24    1.19 
   8 -12  -1   11.46    1.25 
  -8 -12   1   11.71    1.10 
   8  12  -1   11.57    1.17 
   8  12  -1   11.91    1.19 
  -8  12   1   11.41    1.24 
   8  12  -1   11.88    1.23 
   7 -12  -1    5.97    0.77 
  -7 -12   1    6.86    0.71 
  -7 -12   1    6.51    0.80 
   7 -12  -1    5.79    0.71 
   7  12  -1    6.06    0.75 
   7  12  -1    7.04    0.73 
   7  12  -1    7.49    0.77 
  -7  12   1    5.92    0.82 
   6 -12  -1    2.42    0.50 
   6 -12  -1    2.64    0.50 
   6 -12  -1    2.86    0.44 
  -6 -12   1    2.50    0.36 
  -6 -12   1    2.14    0.50 
   6  12  -1    3.09    0.47 
   6  12  -1    2.13    0.45 
  -6  12   1    3.61    0.59 
   6  12  -1    2.08    0.50 
  -6  12   1    2.74    0.35 
   5 -12  -1    2.86    0.53 
   5 -12  -1    4.76    0.55 
  -5 -12   1    3.05    0.53 
   5 -12  -1    3.38    0.47 
  -5 -12   1    3.25    0.40 
  -5  12   1    3.91    0.39 
  -5  12   1    2.12    0.57 
   5  12  -1    2.74    0.51 
   5  12  -1    3.41    0.51 
   5  12  -1    2.81    0.47 
   4 -12  -1   12.32    1.08 
   4 -12  -1   10.82    1.11 
  -4 -12   1   11.07    1.05 
  -4 -12   1   10.88    1.16 
   4 -12  -1   11.59    1.14 
  -4  12   1   10.48    1.01 
  -4  12   1   10.40    1.19 
   4  12  -1   11.25    1.13 
   4  12  -1   11.31    1.09 
   4  12  -1   11.75    1.10 
  -3 -12   1    3.33    0.55 
   3 -12  -1    3.17    0.47 
   3 -12  -1    2.84    0.45 
  -3 -12   1    3.49    0.43 
   3 -12  -1    2.38    0.48 
   3  12  -1    3.24    0.47 
   3  12  -1    3.02    0.45 
   3  12  -1    3.26    0.56 
  -3  12   1    3.19    0.39 
  -3  12   1    2.29    0.56 
   2 -12  -1   14.70    1.36 
  -2 -12   1   15.42    1.42 
   2 -12  -1   15.06    1.31 
   2 -12  -1   13.45    1.33 
  -2 -12   1   15.05    1.31 
  -2  12   1   14.63    1.29 
  -2  12   1   13.11    1.44 
   2  12  -1   13.53    1.31 
   2  12  -1   14.46    1.33 
   2  12  -1   12.94    1.41 
   1 -12  -1   26.36    2.24 
   1 -12  -1   23.57    2.29 
   1 -12  -1   25.25    2.28 
  -1 -12   1   27.26    2.27 
  -1 -12   1   25.62    2.33 
  -1  12   1   27.03    2.25 
   1  12  -1   27.32    2.26 
   1  12  -1   26.25    2.28 
   1  12  -1   24.61    2.35 
  -1  12   1   24.73    2.35 
   0 -12  -1    1.79    0.48 
   0 -12   1    1.90    0.47 
   0 -12   1    1.81    0.38 
   0 -12  -1    1.81    0.41 
   0  12  -1    1.50    0.34 
   0  12  -1    1.64    0.57 
   0  12   1    2.29    0.42 
   0  12   1    1.23    0.54 
   0  12  -1    1.83    0.42 
   0  12   1    2.19    0.39 
  -1 -12  -1    5.62    0.64 
  -1 -12  -1    5.11    0.55 
   1 -12   1    4.88    0.56 
   1 -12   1    4.22    0.60 
   1  12   1    3.72    0.53 
  -1  12  -1    3.83    0.54 
   1  12   1    3.13    0.56 
  -1  12  -1    5.18    0.70 
   1  12   1    5.60    0.69 
  -1  12  -1    3.64    0.49 
   2 -12   1   41.30    3.45 
  -2 -12  -1   39.81    3.46 
   2 -12   1   37.62    3.44 
  -2 -12  -1   41.31    3.43 
   2  12   1   40.46    3.44 
  -2  12  -1   39.07    3.50 
   2  12   1   40.09    3.43 
  -2  12  -1   41.55    3.40 
   2  12   1   38.06    3.49 
  -3 -12  -1    7.89    0.81 
  -3 -12  -1    8.46    0.90 
   3 -12   1    7.30    0.83 
   3 -12   1    7.39    0.81 
   3  12   1    7.91    0.85 
   3  12   1    7.62    0.85 
  -3  12  -1    8.14    0.75 
  -3  12  -1    7.38    0.90 
   3  12   1    7.09    0.80 
   4 -12   1    9.29    0.96 
  -4 -12  -1    8.99    1.01 
  -4 -12  -1    9.47    0.91 
   4 -12   1    9.19    1.03 
   4  12   1    8.13    0.95 
  -4  12  -1    8.03    1.00 
   4  12   1    9.58    0.97 
  -4  12  -1   10.54    0.86 
   4  12   1    9.81    0.98 
  -5 -12  -1   40.94    3.48 
  -5 -12  -1   40.95    3.53 
   5 -12   1   40.95    3.52 
   5 -12   1   42.93    3.51 
   5  12   1   35.73    3.50 
  -5  12  -1   40.65    3.56 
  -5  12  -1   39.75    3.45 
   5  12   1   40.31    3.51 
   5  12   1   45.37    3.52 
  -6 -12  -1    7.74    0.81 
   6 -12   1    6.76    0.81 
  -6 -12  -1    7.07    0.85 
   6 -12   1    8.18    0.86 
   6  12   1    8.25    0.83 
   6  12   1    6.26    0.82 
  -6  12  -1    6.46    0.90 
   6  12   1    9.32    0.87 
  -6  12  -1    9.68    0.75 
  -7 -12  -1    1.42    0.32 
   7 -12   1    0.65    0.40 
  -7 -12  -1    0.49    0.44 
   7 -12   1    1.12    0.43 
  -7  12  -1    0.84    0.55 
   7  12   1    1.07    0.44 
   7  12   1    0.56    0.42 
   7  12   1    1.53    0.39 
  -8 -12  -1    3.13    0.61 
   8 -12   1    3.84    0.57 
   8 -12   1    4.44    0.62 
  -8 -12  -1    3.70    0.48 
  -8  12  -1    3.17    0.67 
   8  12   1    2.89    0.57 
   8  12   1    4.53    0.61 
   8  12   1    4.27    0.56 
   9 -12   1   41.25    3.60 
  -9 -12  -1   39.78    3.64 
   9 -12   1   40.17    3.63 
  -9 -12  -1   41.88    3.55 
   9  12   1   43.36    3.62 
  -9  12  -1   41.58    3.67 
   9  12   1   41.06    3.60 
   9  12   1   42.70    3.59 
 -10 -12  -1    6.42    0.84 
  10 -12   1    4.68    0.79 
  10 -12   1    5.99    0.78 
 -10 -12  -1    6.32    0.76 
  10  12   1    6.47    0.75 
  10  12   1    5.89    0.77 
 -10  12  -1    5.45    0.88 
  10  12   1    6.59    0.80 
 -11 -12  -1   -0.48    0.56 
  11 -12   1   -0.10    0.53 
  11 -12   1    0.56    0.57 
  11  12   1   -0.20    0.45 
 -11  12  -1    0.33    0.68 
  11  12   1   -0.30    0.49 
  12 -12   1   -0.16    0.55 
  12 -12   1    1.07    0.61 
 -12 -12  -1    0.45    0.63 
  12  12   1    0.92    0.56 
 -12  12  -1   -0.12    0.67 
 -12  12  -1   -0.25    0.53 
  12  12   1    0.94    0.49 
  13 -12   1    0.92    0.63 
  13 -12   1    0.54    0.62 
 -13 -12  -1    0.68    0.72 
  13  12   1   -0.09    0.48 
 -13  12  -1   -1.06    0.72 
 -13  12  -1   -0.26    0.56 
  13  12   1    0.22    0.57 
 -14 -12  -1    4.37    0.94 
  14 -12   1    3.73    0.81 
 -14  12  -1    5.33    0.97 
  14  12   1    4.60    0.81 
 -14  12  -1    4.71    0.80 
  14  12   1    4.19    0.74 
 -15 -12  -1    1.45    0.82 
  15  12   1    2.37    0.66 
  15  12   1    1.68    0.69 
 -15  12  -1    2.13    0.68 
 -15  12  -1    2.51    0.94 
 -15 -13   1    0.19    0.88 
 -15  13   1    1.42    0.92 
  15  13  -1    1.43    0.71 
 -15  13   1    1.57    0.66 
  15  13  -1    2.21    0.65 
  14 -13  -1    2.82    0.75 
 -14 -13   1    1.75    0.86 
 -14  13   1    1.50    0.91 
  14  13  -1    1.23    0.62 
  14  13  -1    2.29    0.70 
 -14  13   1    1.27    0.65 
  13 -13  -1    5.09    0.80 
 -13 -13   1    1.75    0.81 
  13  13  -1    4.72    0.76 
 -13  13   1    1.14    0.87 
 -13  13   1    3.15    0.71 
  13  13  -1    3.25    0.65 
 -12 -13   1   -0.48    0.65 
  12 -13  -1    0.54    0.55 
  12 -13  -1    0.97    0.61 
  12  13  -1   -0.02    0.54 
  12  13  -1    0.70    0.54 
 -12  13   1   -0.38    0.75 
  11 -13  -1    1.17    0.53 
  11 -13  -1    1.06    0.59 
 -11 -13   1    0.94    0.65 
  11  13  -1    0.99    0.52 
  11  13  -1    1.49    0.58 
 -11  13   1    0.46    0.69 
  11  13  -1    1.37    0.59 
 -10 -13   1    1.99    0.67 
  10 -13  -1    2.47    0.62 
  10 -13  -1    2.47    0.57 
  10  13  -1    2.14    0.58 
  10  13  -1    3.83    0.62 
  10  13  -1    3.15    0.57 
 -10  13   1    1.72    0.72 
  -9 -13   1    0.94    0.55 
   9 -13  -1    1.13    0.53 
   9 -13  -1    0.49    0.44 
   9  13  -1    0.33    0.43 
   9  13  -1    0.37    0.49 
   9  13  -1    0.71    0.48 
  -9  13   1    0.12    0.60 
  -8 -13   1    5.24    0.58 
   8 -13  -1    6.23    0.75 
   8 -13  -1    5.34    0.67 
  -8 -13   1    4.91    0.77 
   8  13  -1    4.24    0.70 
   8  13  -1    6.74    0.73 
   8  13  -1    4.80    0.67 
  -8  13   1    5.10    0.80 
  -7 -13   1    3.91    0.71 
   7 -13  -1    5.54    0.66 
  -7 -13   1    5.79    0.58 
   7 -13  -1    5.89    0.72 
   7  13  -1    5.84    0.70 
   7  13  -1    4.46    0.70 
   7  13  -1    5.83    0.66 
  -7  13   1    5.64    0.60 
  -7  13   1    4.38    0.77 
   6 -13  -1   -0.09    0.41 
  -6 -13   1    0.45    0.45 
  -6 -13   1    0.30    0.26 
   6 -13  -1   -0.05    0.35 
   6  13  -1    0.10    0.43 
   6  13  -1    0.08    0.41 
   6  13  -1    0.32    0.37 
  -6  13   1    0.66    0.25 
  -6  13   1   -0.08    0.50 
   5 -13  -1    6.25    0.68 
  -5 -13   1    5.38    0.57 
  -5 -13   1    5.87    0.72 
   5 -13  -1    5.50    0.63 
   5 -13  -1    4.41    0.67 
   5  13  -1    5.64    0.66 
   5  13  -1    5.40    0.69 
  -5  13   1    3.71    0.71 
  -5  13   1    5.79    0.58 
   5  13  -1    5.46    0.64 
   4 -13  -1    1.17    0.36 
  -4 -13   1    1.35    0.45 
  -4 -13   1    1.35    0.30 
   4 -13  -1    0.94    0.41 
   4 -13  -1    1.23    0.42 
   4  13  -1    1.91    0.46 
  -4  13   1    1.43    0.27 
   4  13  -1    0.73    0.38 
  -4  13   1    0.35    0.49 
   4  13  -1    1.91    0.41 
   3 -13  -1   25.20    2.12 
  -3 -13   1   23.13    2.08 
   3 -13  -1   23.63    2.13 
  -3 -13   1   23.00    2.16 
   3 -13  -1   24.11    2.11 
   3  13  -1   24.22    2.11 
   3  13  -1   23.86    2.10 
  -3  13   1   24.58    2.07 
   3  13  -1   22.65    2.18 
  -3  13   1   23.13    2.18 
  -2 -13   1    5.52    0.56 
   2 -13  -1    4.20    0.59 
  -2 -13   1    5.81    0.70 
   2 -13  -1    5.63    0.61 
  -2  13   1    3.76    0.68 
  -2  13   1    4.18    0.53 
   2  13  -1    4.05    0.70 
   2  13  -1    5.08    0.57 
   2  13  -1    4.20    0.58 
  -1 -13   1    0.47    0.45 
   1 -13  -1    0.23    0.35 
   1 -13  -1    0.04    0.40 
  -1 -13   1    0.49    0.33 
   1  13  -1    0.62    0.52 
  -1  13   1   -0.05    0.50 
  -1  13   1    0.75    0.31 
   1  13  -1    0.32    0.36 
   1  13  -1    0.72    0.32 
   0 -13   1    0.53    0.43 
   0 -13  -1    1.56    0.45 
   0 -13  -1    0.80    0.38 
   0 -13   1    1.50    0.36 
   0  13   1    0.73    0.39 
   0  13   1    2.67    0.57 
   0  13  -1    1.50    0.57 
   0  13   1    1.21    0.34 
   0  13  -1    0.52    0.32 
   0  13  -1    1.11    0.38 
   1 -13   1   50.56    4.19 
  -1 -13  -1   50.59    4.23 
  -1 -13  -1   51.43    4.19 
   1 -13   1   45.83    4.22 
  -1  13  -1   48.80    4.16 
  -1  13  -1   49.53    4.19 
   1  13   1   46.23    4.18 
  -1  13  -1   50.30    4.26 
   1  13   1   48.36    4.20 
   1  13   1   49.17    4.25 
   2 -13   1   22.91    2.23 
  -2 -13  -1   26.24    2.26 
  -2 -13  -1   25.65    2.20 
   2 -13   1   24.72    2.22 
   2  13   1   25.98    2.20 
   2  13   1   24.11    2.22 
   2  13   1   21.80    2.28 
  -2  13  -1   27.22    2.17 
  -2  13  -1   25.66    2.30 
  -3 -13  -1    0.29    0.30 
  -3 -13  -1    0.42    0.41 
   3 -13   1    0.80    0.37 
   3 -13   1    0.40    0.37 
   3  13   1    0.17    0.35 
   3  13   1    0.03    0.47 
  -3  13  -1   -0.25    0.24 
  -3  13  -1    0.10    0.48 
   3  13   1   -0.22    0.35 
   4 -13   1   31.94    2.67 
  -4 -13  -1   31.87    2.67 
  -4 -13  -1   30.58    2.61 
   4 -13   1   31.34    2.64 
   4  13   1   27.35    2.64 
  -4  13  -1   28.43    2.58 
  -4  13  -1   30.30    2.71 
   4  13   1   31.59    2.66 
   4  13   1   29.65    2.65 
   5 -13   1   14.93    1.42 
  -5 -13  -1   13.90    1.31 
   5 -13   1   16.21    1.37 
  -5 -13  -1   14.55    1.41 
   5  13   1   17.48    1.42 
  -5  13  -1   12.84    1.26 
   5  13   1   12.83    1.38 
   5  13   1   13.51    1.36 
  -5  13  -1   15.12    1.48 
  -6 -13  -1    1.88    0.50 
   6 -13   1    2.15    0.45 
  -6 -13  -1    2.35    0.37 
   6 -13   1    1.92    0.48 
   6  13   1    1.55    0.43 
  -6  13  -1    2.19    0.30 
   6  13   1    2.33    0.45 
  -6  13  -1    2.10    0.57 
   6  13   1    1.91    0.48 
   7 -13   1    4.93    0.66 
  -7 -13  -1    6.37    0.76 
   7 -13   1    4.62    0.71 
  -7 -13  -1    5.79    0.61 
   7  13   1    6.00    0.70 
  -7  13  -1    5.71    0.59 
   7  13   1    6.76    0.72 
  -7  13  -1    4.98    0.78 
   7  13   1    4.37    0.70 
  -8 -13  -1    0.35    0.50 
   8 -13   1   -0.53    0.45 
  -8 -13  -1    0.10    0.31 
   8 -13   1    0.95    0.42 
  -8  13  -1   -0.15    0.58 
   8  13   1    0.62    0.45 
   8  13   1   -0.06    0.40 
   8  13   1    0.26    0.45 
   9 -13   1   18.01    1.80 
  -9 -13  -1   19.91    1.73 
   9 -13   1   19.83    1.85 
  -9 -13  -1   17.78    1.85 
   9  13   1   18.50    1.81 
  -9  13  -1   17.03    1.90 
   9  13   1   20.76    1.84 
   9  13   1   21.42    1.81 
  10 -13   1    1.43    0.56 
 -10 -13  -1   -0.24    0.56 
  10 -13   1    0.64    0.51 
  10  13   1    0.04    0.50 
  10  13   1    1.31    0.50 
  10  13   1    0.84    0.55 
 -10  13  -1    0.97    0.66 
 -11 -13  -1    1.44    0.64 
  11 -13   1    0.91    0.56 
  11 -13   1    1.86    0.63 
 -11  13  -1    2.04    0.76 
  11  13   1    1.21    0.50 
  11  13   1    1.12    0.58 
  12 -13   1    0.21    0.56 
  12 -13   1    0.16    0.60 
 -12 -13  -1   -0.72    0.66 
  12  13   1    0.06    0.57 
 -12  13  -1   -0.86    0.74 
  12  13   1    0.19    0.52 
 -13 -13  -1    0.77    0.73 
  13 -13   1    0.37    0.67 
  13 -13   1    0.28    0.61 
  13  13   1   -0.28    0.52 
 -13  13  -1    0.03    0.59 
 -13  13  -1    0.93    0.81 
  13  13   1    0.26    0.59 
 -14 -13  -1   -0.38    0.74 
  14 -13   1    0.03    0.69 
 -14  13  -1    0.32    0.84 
  14  13   1   -0.07    0.62 
  14  13   1   -0.51    0.54 
 -14  13  -1    0.16    0.61 
 -15 -13  -1    4.83    1.01 
 -15  13  -1    4.57    1.07 
  15  13   1    4.51    0.80 
  15  13   1    6.27    0.90 
 -15  13  -1    5.23    0.88 
  15 -14  -1    1.97    0.75 
 -15 -14   1   -0.19    0.81 
  15  14  -1    0.15    0.62 
 -15  14   1    1.30    0.96 
  15  14  -1    0.09    0.68 
 -15  14   1    1.12    0.66 
 -14 -14   1    1.24    0.80 
  14 -14  -1    0.49    0.69 
 -14  14   1    1.86    0.65 
  14  14  -1    0.34    0.64 
  14  14  -1   -0.07    0.59 
 -14  14   1    0.85    0.84 
 -13 -14   1    2.00    0.83 
  13 -14  -1    3.45    0.79 
  13  14  -1    3.34    0.77 
 -13  14   1    3.31    0.92 
  13  14  -1    3.92    0.70 
  12 -14  -1    0.06    0.65 
  12 -14  -1    0.00    0.55 
 -12 -14   1   -0.12    0.68 
  12  14  -1    0.94    0.60 
 -12  14   1   -0.91    0.72 
  12  14  -1    0.13    0.52 
 -11 -14   1    0.01    0.64 
  11 -14  -1    0.53    0.54 
  11 -14  -1   -0.10    0.58 
 -11  14   1    1.43    0.73 
  11  14  -1    0.81    0.51 
  11  14  -1    0.28    0.56 
  11  14  -1    1.55    0.59 
  10 -14  -1    1.39    0.54 
 -10 -14   1    0.23    0.62 
  10 -14  -1    2.31    0.63 
  10  14  -1    0.61    0.55 
  10  14  -1    1.16    0.56 
  10  14  -1    1.80    0.53 
 -10  14   1    1.72    0.70 
   9 -14  -1    5.53    0.69 
  -9 -14   1    3.80    0.76 
   9 -14  -1    4.59    0.76 
   9  14  -1    5.22    0.73 
   9  14  -1    5.29    0.71 
  -9  14   1    5.38    0.86 
   9  14  -1    4.73    0.74 
  -8 -14   1    3.47    0.45 
   8 -14  -1    3.02    0.63 
   8 -14  -1    3.06    0.54 
  -8 -14   1    2.43    0.64 
   8  14  -1    3.47    0.56 
   8  14  -1    2.89    0.59 
   8  14  -1    3.17    0.59 
  -8  14   1    3.29    0.42 
  -8  14   1    2.03    0.71 
  -7 -14   1    5.44    0.56 
   7 -14  -1    6.02    0.66 
   7 -14  -1    4.35    0.70 
  -7 -14   1    4.24    0.70 
   7  14  -1    5.00    0.70 
  -7  14   1    4.86    0.80 
  -7  14   1    4.56    0.53 
   7  14  -1    5.04    0.64 
   7  14  -1    4.60    0.67 
  -6 -14   1    3.34    0.66 
   6 -14  -1    4.35    0.60 
  -6 -14   1    5.05    0.53 
   6 -14  -1    5.08    0.68 
   6  14  -1    4.69    0.65 
   6  14  -1    5.42    0.64 
  -6  14   1    2.93    0.72 
  -6  14   1    6.01    0.57 
   6  14  -1    3.75    0.65 
   5 -14  -1    1.35    0.46 
  -5 -14   1    1.55    0.48 
  -5 -14   1    1.30    0.31 
   5 -14  -1    2.02    0.41 
   5  14  -1    1.74    0.51 
  -5  14   1    0.81    0.27 
   5  14  -1    0.31    0.39 
   5  14  -1    0.71    0.41 
  -5  14   1    1.59    0.54 
   4 -14  -1    0.79    0.37 
   4 -14  -1    0.08    0.40 
  -4 -14   1    0.44    0.31 
  -4 -14   1   -0.23    0.45 
   4  14  -1    0.27    0.37 
  -4  14   1    0.28    0.26 
  -4  14   1   -0.01    0.49 
   4  14  -1    0.70    0.44 
   4  14  -1    0.32    0.37 
  -3 -14   1   -0.26    0.44 
   3 -14  -1    0.27    0.37 
   3 -14  -1    0.34    0.39 
  -3 -14   1   -0.38    0.29 
  -3  14   1   -0.10    0.27 
   3  14  -1   -0.31    0.35 
   3  14  -1    0.19    0.49 
   3  14  -1    0.20    0.34 
  -3  14   1   -0.06    0.49 
   2 -14  -1   44.51    3.91 
  -2 -14   1   46.54    3.89 
  -2 -14   1   44.26    3.95 
   2  14  -1   47.11    3.89 
   2  14  -1   49.01    3.90 
  -2  14   1   48.63    3.87 
   2  14  -1   40.25    3.95 
  -2  14   1   41.56    3.96 
  -1 -14   1    4.35    0.58 
   1 -14  -1    4.56    0.61 
  -1 -14   1    4.10    0.69 
   1 -14  -1    4.09    0.65 
   1  14  -1    3.80    0.75 
  -1  14   1    4.26    0.74 
   1  14  -1    5.46    0.57 
   1  14  -1    5.68    0.63 
  -1  14   1    5.81    0.57 
  -1  14   1    5.98    0.63 
   0 -14  -1   33.41    2.93 
   0 -14   1   36.34    2.96 
   0 -14   1   34.16    2.90 
   0 -14  -1   35.67    2.91 
   0  14   1   38.76    3.01 
   0  14  -1   32.06    2.91 
   0  14  -1   31.12    2.87 
   0  14   1   29.87    2.88 
   0  14  -1   34.15    2.99 
   0  14   1   31.78    2.91 
   1 -14   1   46.63    4.02 
   1 -14   1   43.24    4.04 
  -1 -14  -1   47.80    4.02 
  -1 -14  -1   50.55    4.07 
  -1  14  -1   45.91    4.02 
  -1  14  -1   46.88    3.99 
   1  14   1   46.59    4.03 
   1  14   1   46.75    4.01 
   1  14   1   48.80    4.10 
  -1  14  -1   46.89    4.09 
   2 -14   1    1.04    0.38 
  -2 -14  -1    0.84    0.34 
  -2 -14  -1    0.83    0.46 
   2 -14   1    0.40    0.40 
   2  14   1    0.23    0.52 
   2  14   1    0.38    0.40 
   2  14   1    0.41    0.37 
  -2  14  -1    0.39    0.28 
  -2  14  -1    0.01    0.50 
  -3 -14  -1    0.32    0.32 
   3 -14   1    0.18    0.38 
   3 -14   1    0.98    0.40 
  -3 -14  -1    0.49    0.44 
  -3  14  -1    0.30    0.27 
   3  14   1    0.50    0.51 
  -3  14  -1    1.32    0.55 
   3  14   1    0.46    0.38 
   3  14   1    0.54    0.37 
   4 -14   1   29.20    2.46 
  -4 -14  -1   25.17    2.48 
   4 -14   1   26.68    2.47 
  -4 -14  -1   27.73    2.42 
   4  14   1   27.02    2.47 
   4  14   1   29.20    2.49 
  -4  14  -1   28.14    2.54 
  -4  14  -1   28.62    2.39 
   4  14   1   28.33    2.46 
   5 -14   1    0.78    0.46 
  -5 -14  -1    1.78    0.34 
  -5 -14  -1    1.57    0.49 
   5 -14   1    1.69    0.44 
  -5  14  -1    1.41    0.28 
   5  14   1    1.68    0.50 
   5  14   1    1.97    0.44 
   5  14   1    1.23    0.45 
  -5  14  -1    1.45    0.59 
  -6 -14  -1    6.13    0.67 
   6 -14   1    6.55    0.75 
  -6 -14  -1    6.99    0.82 
   6 -14   1    8.30    0.82 
   6  14   1    6.31    0.77 
   6  14   1    5.74    0.75 
  -6  14  -1    5.85    0.86 
   6  14   1    5.91    0.77 
  -6  14  -1    7.01    0.66 
  -7 -14  -1    0.89    0.49 
   7 -14   1    0.20    0.48 
   7 -14   1    1.46    0.45 
  -7 -14  -1    0.91    0.34 
   7  14   1    0.90    0.48 
  -7  14  -1    1.77    0.61 
   7  14   1    0.02    0.46 
  -7  14  -1    1.30    0.27 
   7  14   1    0.90    0.45 
  -8 -14  -1    0.12    0.33 
   8 -14   1   -0.40    0.43 
  -8 -14  -1    0.62    0.52 
   8 -14   1   -0.97    0.46 
   8  14   1   -0.04    0.45 
   8  14   1    0.43    0.43 
  -8  14  -1   -0.28    0.36 
  -8  14  -1    0.21    0.61 
   8  14   1    0.26    0.46 
   9 -14   1   10.40    1.22 
   9 -14   1   13.46    1.30 
  -9 -14  -1   12.39    1.14 
  -9 -14  -1    9.08    1.22 
   9  14   1   11.72    1.25 
   9  14   1   12.27    1.27 
  -9  14  -1   10.11    1.29 
   9  14   1   12.66    1.24 
 -10 -14  -1    1.52    0.65 
  10 -14   1    1.31    0.61 
  10 -14   1    2.47    0.60 
  10  14   1    3.25    0.65 
  10  14   1    3.06    0.56 
  10  14   1    2.71    0.59 
 -10  14  -1    2.21    0.74 
 -11 -14  -1    3.47    0.78 
  11 -14   1    3.88    0.69 
  11 -14   1    3.98    0.73 
 -11  14  -1    3.90    0.84 
  11  14   1    2.80    0.63 
  11  14   1    2.12    0.68 
 -12 -14  -1   -0.25    0.66 
  12 -14   1    0.60    0.63 
  12 -14   1    1.11    0.61 
  12  14   1    0.61    0.51 
  12  14   1    2.12    0.63 
 -12  14  -1    0.80    0.79 
 -13 -14  -1    0.86    0.80 
  13 -14   1    0.86    0.66 
  13 -14   1    1.12    0.66 
  13  14   1    0.55    0.54 
 -13  14  -1    0.24    0.81 
  13  14   1   -1.13    0.60 
 -13  14  -1    0.10    0.59 
  14 -14   1    4.48    0.88 
 -14 -14  -1    4.18    0.97 
 -14  14  -1    4.49    0.84 
  14  14   1    4.78    0.80 
 -14  14  -1    5.32    1.08 
  14  14   1    6.02    0.87 
 -15 -14  -1    3.54    0.99 
  15  14   1    4.97    0.82 
 -15  14  -1    4.10    0.84 
  15  14   1    5.47    0.90 
 -15  14  -1    3.31    1.06 
  15 -15  -1    1.75    0.80 
 -15 -15   1   -0.71    0.82 
  15  15  -1   -0.79    0.63 
 -15  15   1   -0.10    0.65 
  15  15  -1    0.66    0.71 
 -15  15   1   -0.32    0.93 
 -14 -15   1    1.36    0.84 
  14 -15  -1   -0.03    0.74 
  14  15  -1   -0.01    0.71 
 -14  15   1    1.26    0.93 
  14  15  -1    0.46    0.61 
 -14  15   1    0.50    0.65 
 -13 -15   1    0.64    0.76 
  13 -15  -1   -0.05    0.69 
 -13  15   1    1.10    0.89 
  13  15  -1    0.07    0.58 
  13  15  -1    1.31    0.65 
 -12 -15   1    1.73    0.77 
  12 -15  -1    2.26    0.72 
  12  15  -1    2.13    0.61 
 -12  15   1    3.19    0.91 
  12  15  -1    2.61    0.69 
 -11 -15   1    0.15    0.71 
  11 -15  -1    1.64    0.67 
  11 -15  -1    1.22    0.59 
 -11  15   1    0.70    0.81 
  11  15  -1    0.77    0.59 
  11  15  -1    1.82    0.66 
  11  15  -1    2.76    0.59 
  10 -15  -1    0.42    0.57 
 -10 -15   1   -0.27    0.60 
  10 -15  -1    0.00    0.50 
  10  15  -1   -0.21    0.54 
  10  15  -1   -0.39    0.48 
  10  15  -1    0.03    0.57 
 -10  15   1    0.23    0.72 
  -9 -15   1    0.39    0.59 
   9 -15  -1    1.01    0.59 
   9 -15  -1    0.18    0.47 
   9  15  -1    0.47    0.53 
   9  15  -1    1.14    0.51 
   9  15  -1    1.45    0.56 
  -9  15   1    1.28    0.69 
  -8 -15   1    0.43    0.49 
   8 -15  -1    0.28    0.46 
   8 -15  -1   -0.12    0.52 
  -8 -15   1    0.72    0.55 
   8  15  -1    0.06    0.45 
  -8  15   1    0.21    0.29 
   8  15  -1    0.49    0.49 
  -8  15   1    1.07    0.65 
   8  15  -1   -0.57    0.50 
   7 -15  -1    0.27    0.50 
  -7 -15   1    0.18    0.52 
  -7 -15   1    0.52    0.31 
   7 -15  -1    0.28    0.42 
   7  15  -1    0.04    0.49 
  -7  15   1    0.45    0.28 
   7  15  -1    0.96    0.44 
  -7  15   1    0.05    0.60 
   7  15  -1    0.35    0.47 
  -6 -15   1    3.68    0.45 
   6 -15  -1    3.15    0.54 
  -6 -15   1    2.01    0.58 
   6 -15  -1    2.67    0.59 
   6  15  -1    3.40    0.53 
  -6  15   1    3.07    0.68 
   6  15  -1    2.79    0.60 
   6  15  -1    2.97    0.56 
  -6  15   1    3.62    0.41 
  -5 -15   1   21.40    1.92 
   5 -15  -1   22.25    1.97 
  -5 -15   1   19.46    2.01 
   5 -15  -1   20.84    2.01 
   5  15  -1   19.97    1.99 
  -5  15   1   22.98    1.89 
   5  15  -1   22.84    1.97 
  -5  15   1   19.18    2.05 
   5  15  -1   24.30    1.99 
   4 -15  -1   13.47    1.23 
   4 -15  -1   11.79    1.27 
  -4 -15   1   12.04    1.18 
  -4 -15   1   12.40    1.27 
   4  15  -1   12.35    1.22 
  -4  15   1   13.08    1.15 
   4  15  -1   12.51    1.24 
  -4  15   1   10.49    1.28 
   4  15  -1   12.77    1.31 
  -3 -15   1    7.03    0.84 
  -3 -15   1    6.98    0.70 
   3 -15  -1    6.75    0.76 
   3 -15  -1    5.23    0.73 
   3  15  -1    6.35    0.74 
   3  15  -1    6.21    0.83 
   3  15  -1    6.38    0.71 
  -3  15   1    5.01    0.84 
  -3  15   1    7.52    0.73 
  -2 -15   1    2.74    0.59 
   2 -15  -1    1.56    0.49 
   2 -15  -1    2.88    0.50 
  -2 -15   1    3.31    0.45 
  -2  15   1    3.53    0.65 
   2  15  -1    3.99    0.65 
   2  15  -1    2.66    0.45 
  -2  15   1    2.39    0.42 
   2  15  -1    2.93    0.50 
  -1 -15   1    0.35    0.35 
  -1 -15   1    0.57    0.48 
   1 -15  -1    0.68    0.39 
   1 -15  -1    0.62    0.46 
   1  15  -1    0.61    0.33 
   1  15  -1    0.88    0.40 
  -1  15   1    0.61    0.54 
  -1  15   1    1.15    0.35 
   1  15  -1    0.96    0.58 
  -1  15   1    0.83    0.40 
   0 -15  -1    9.14    0.94 
   0 -15   1    9.26    0.96 
   0 -15  -1    9.47    0.97 
   0 -15   1    8.65    0.89 
   0  15  -1    8.39    0.90 
   0  15   1    8.31    1.02 
   0  15  -1    8.66    0.90 
   0  15  -1    8.55    1.02 
   0  15   1    8.99    0.92 
   0  15   1    7.79    0.90 
  -1 -15  -1   16.46    1.78 
   1 -15   1   19.80    1.70 
   1 -15   1   17.77    1.74 
  -1 -15  -1   19.91    1.70 
  -1  15  -1   18.10    1.66 
   1  15   1   18.62    1.69 
  -1  15  -1   18.34    1.70 
   1  15   1   17.98    1.70 
   1  15   1   20.38    1.85 
  -1  15  -1   18.01    1.82 
  -2 -15  -1    0.85    0.36 
   2 -15   1    0.62    0.37 
   2 -15   1   -0.05    0.41 
  -2 -15  -1   -0.41    0.45 
   2  15   1   -0.43    0.37 
  -2  15  -1   -0.44    0.52 
   2  15   1    0.11    0.40 
  -2  15  -1   -0.25    0.27 
  -2  15  -1   -0.20    0.36 
   2  15   1    0.38    0.53 
   3 -15   1    0.33    0.38 
   3 -15   1   -0.28    0.41 
  -3 -15  -1    0.29    0.34 
  -3 -15  -1    0.05    0.45 
  -3  15  -1   -0.27    0.55 
   3  15   1    0.53    0.53 
  -3  15  -1    0.13    0.28 
   3  15   1    0.02    0.39 
   3  15   1    0.43    0.38 
  -4 -15  -1    0.48    0.46 
   4 -15   1    0.54    0.41 
   4 -15   1    0.24    0.40 
  -4 -15  -1    1.13    0.34 
  -4  15  -1    0.93    0.57 
   4  15   1    0.00    0.49 
  -4  15  -1    0.37    0.27 
   4  15   1    0.57    0.41 
   4  15   1    0.26    0.41 
   5 -15   1   72.58    6.00 
  -5 -15  -1   71.76    5.97 
   5 -15   1   69.52    6.01 
  -5 -15  -1   67.37    6.02 
   5  15   1   71.70    6.00 
  -5  15  -1   72.89    5.94 
  -5  15  -1   64.33    6.05 
   5  15   1   71.10    6.00 
   5  15   1   71.63    6.02 
  -6 -15  -1   11.74    1.14 
  -6 -15  -1    8.59    1.18 
   6 -15   1   11.45    1.26 
   6 -15   1   11.65    1.21 
   6  15   1   12.53    1.21 
   6  15   1   11.19    1.24 
   6  15   1   12.20    1.23 
  -6  15  -1   13.84    1.08 
  -6  15  -1   10.24    1.27 
  -7 -15  -1    0.99    0.55 
   7 -15   1    2.17    0.50 
   7 -15   1    1.34    0.53 
  -7 -15  -1    1.36    0.37 
   7  15   1    1.05    0.47 
  -7  15  -1    1.73    0.31 
   7  15   1    2.51    0.54 
   7  15   1    1.91    0.53 
  -7  15  -1    1.30    0.64 
  -8 -15  -1    0.17    0.52 
  -8 -15  -1    0.53    0.35 
   8 -15   1    0.40    0.53 
   8 -15   1    0.55    0.48 
   8  15   1    1.16    0.48 
   8  15   1   -0.12    0.48 
  -8  15  -1   -0.08    0.61 
   8  15   1   -0.45    0.48 
   9 -15   1    7.67    0.91 
   9 -15   1    7.53    0.85 
  -9 -15  -1    5.58    0.90 
   9  15   1    7.58    0.84 
   9  15   1    5.49    0.83 
   9  15   1    8.16    0.90 
  -9  15  -1    4.15    0.94 
  10 -15   1    5.60    0.79 
 -10 -15  -1    2.98    0.77 
  10 -15   1    3.49    0.71 
  10  15   1    5.03    0.71 
  10  15   1    4.70    0.75 
  10  15   1    6.37    0.79 
 -10  15  -1    3.66    0.90 
  11 -15   1    9.28    1.09 
 -11 -15  -1    8.74    1.14 
  11 -15   1   10.31    1.14 
  11  15   1    8.75    1.06 
 -11  15  -1    7.61    1.19 
  11  15   1   11.17    1.12 
 -12 -15  -1    0.78    0.73 
  12 -15   1    1.77    0.70 
  12 -15   1    1.92    0.65 
  12  15   1    1.08    0.63 
  12  15   1    1.14    0.57 
 -12  15  -1    0.94    0.84 
  13 -15   1   -0.25    0.68 
 -13 -15  -1    0.00    0.74 
 -13  15  -1   -1.47    0.82 
  13  15   1    1.33    0.67 
  13  15   1    0.90    0.58 
 -13  15  -1   -0.40    0.58 
  14 -15   1    1.42    0.74 
 -14 -15  -1    0.19    0.85 
  14  15   1    0.46    0.63 
 -14  15  -1    0.56    0.92 
 -14  15  -1    0.81    0.65 
  14  15   1    0.22    0.71 
 -15 -15  -1    2.04    0.99 
  15  15   1    2.53    0.79 
 -15  15  -1    1.50    0.72 
 -15  15  -1    3.10    1.04 
  15  15   1    3.85    0.75 
  14 -16  -1    1.56    0.79 
 -14 -16   1    1.50    0.89 
 -14  16   1    1.35    0.99 
  14  16  -1    1.14    0.65 
  14  16  -1    1.86    0.78 
 -14  16   1    1.46    0.70 
 -13 -16   1    0.66    0.81 
  13 -16  -1    1.24    0.75 
 -13  16   1    0.25    0.92 
  13  16  -1    0.72    0.67 
  13  16  -1    1.69    0.64 
  12 -16  -1    0.84    0.71 
 -12 -16   1    2.44    0.80 
 -12  16   1   -0.14    0.84 
  12  16  -1    1.70    0.67 
  12  16  -1    1.91    0.60 
 -11 -16   1    2.13    0.76 
  11 -16  -1    1.48    0.62 
  11 -16  -1    1.24    0.71 
  11  16  -1    2.55    0.68 
 -11  16   1    0.94    0.81 
  11  16  -1    2.67    0.62 
  10 -16  -1    5.81    0.80 
  10 -16  -1    5.68    0.89 
 -10 -16   1    5.80    0.90 
  10  16  -1    5.77    0.85 
  10  16  -1    6.51    0.85 
  10  16  -1    6.06    0.82 
 -10  16   1    4.86    0.98 
   9 -16  -1    0.25    0.60 
   9 -16  -1   -0.03    0.50 
  -9 -16   1   -0.16    0.62 
   9  16  -1   -0.43    0.46 
  -9  16   1   -0.30    0.69 
   9  16  -1    0.67    0.57 
   9  16  -1    0.05    0.55 
   8 -16  -1    0.19    0.46 
   8 -16  -1    0.23    0.54 
  -8 -16   1   -0.47    0.56 
   8  16  -1   -0.93    0.45 
   8  16  -1    0.22    0.54 
   8  16  -1    0.22    0.52 
  -8  16   1   -0.14    0.66 
  -7 -16   1    7.42    0.99 
  -7 -16   1    8.46    0.87 
   7 -16  -1    8.23    0.96 
   7 -16  -1    9.87    0.92 
   7  16  -1    6.00    0.89 
   7  16  -1    9.73    0.98 
  -7  16   1    7.64    0.81 
   7  16  -1    7.58    0.92 
  -7  16   1    6.86    1.01 
   6 -16  -1    2.05    0.50 
  -6 -16   1    1.85    0.58 
   6 -16  -1    1.27    0.53 
  -6 -16   1    2.02    0.40 
  -6  16   1    1.55    0.66 
  -6  16   1    1.67    0.35 
   6  16  -1    1.90    0.50 
   6  16  -1    2.03    0.58 
   6  16  -1    1.70    0.52 
  -5 -16   1    2.66    0.61 
   5 -16  -1    2.38    0.55 
   5 -16  -1    2.41    0.52 
  -5 -16   1    2.41    0.45 
   5  16  -1    2.80    0.54 
  -5  16   1    2.60    0.67 
  -5  16   1    2.88    0.40 
   5  16  -1    2.02    0.51 
   5  16  -1    3.07    0.60 
  -4 -16   1    0.00    0.52 
   4 -16  -1    0.36    0.45 
  -4 -16   1    0.29    0.33 
   4 -16  -1    0.12    0.42 
   4  16  -1   -0.05    0.41 
  -4  16   1    1.20    0.60 
   4  16  -1    0.45    0.45 
   4  16  -1    0.53    0.56 
  -4  16   1    0.76    0.30 
   3 -16  -1    0.39    0.41 
  -3 -16   1    0.87    0.53 
  -3 -16   1   -0.27    0.33 
   3 -16  -1    0.76    0.45 
   3  16  -1   -0.29    0.55 
   3  16  -1    0.16    0.37 
  -3  16   1    0.25    0.55 
   3  16  -1    0.76    0.41 
  -3  16   1   -0.20    0.30 
   2 -16  -1    0.37    0.44 
  -2 -16   1    0.41    0.51 
  -2 -16   1    0.90    0.37 
   2 -16  -1    0.53    0.42 
   2  16  -1    1.48    0.43 
  -2  16   1    1.12    0.58 
  -2  16   1    0.97    0.33 
   2  16  -1    0.61    0.57 
   2  16  -1    0.95    0.38 
  -1 -16   1    6.47    0.78 
   1 -16  -1    8.11    0.88 
   1 -16  -1    7.06    0.82 
  -1 -16   1    8.32    0.91 
   1  16  -1    8.00    0.82 
  -1  16   1    7.94    0.82 
  -1  16   1    6.37    0.93 
   1  16  -1    7.64    0.78 
  -1  16   1    6.93    0.76 
   1  16  -1    7.44    0.96 
   0 -16  -1   46.03    3.72 
   0 -16   1   43.87    3.68 
   0 -16  -1   42.20    3.68 
   0 -16   1   44.62    3.72 
   0  16  -1   41.79    3.76 
   0  16   1   41.52    3.68 
   0  16  -1   41.42    3.68 
   0  16   1   42.25    3.65 
   0  16   1   41.92    3.77 
   0  16  -1   41.41    3.65 
  -1 -16  -1   13.21    1.22 
  -1 -16  -1   11.72    1.25 
   1 -16   1   11.73    1.22 
   1 -16   1   11.81    1.31 
   1  16   1   11.75    1.30 
   1  16   1   12.50    1.23 
   1  16   1   11.43    1.18 
  -1  16  -1   12.75    1.22 
  -1  16  -1   12.86    1.17 
  -1  16  -1   12.35    1.38 
   2 -16   1   -0.14    0.43 
   2 -16   1    0.17    0.39 
  -2 -16  -1   -0.44    0.35 
  -2 -16  -1   -0.19    0.51 
   2  16   1   -0.06    0.38 
  -2  16  -1    0.18    0.29 
  -2  16  -1   -0.11    0.57 
   2  16   1   -0.74    0.53 
   2  16   1   -0.74    0.41 
  -2  16  -1   -0.14    0.37 
  -3 -16  -1    0.67    0.51 
  -3 -16  -1    1.14    0.38 
   3 -16   1    1.16    0.45 
   3 -16   1    0.72    0.46 
  -3  16  -1    1.00    0.61 
  -3  16  -1    1.48    0.33 
   3  16   1    0.90    0.59 
   3  16   1    1.73    0.43 
   3  16   1    0.81    0.43 
  -4 -16  -1    7.71    0.77 
   4 -16   1    7.35    0.83 
  -4 -16  -1    5.83    0.86 
   4 -16   1    7.74    0.84 
   4  16   1    7.15    0.81 
   4  16   1    6.19    0.88 
   4  16   1    7.10    0.83 
  -4  16  -1    7.03    0.94 
  -4  16  -1    7.11    0.74 
  -5 -16  -1    2.64    0.60 
  -5 -16  -1    3.91    0.49 
   5 -16   1    2.74    0.57 
   5 -16   1    3.76    0.58 
   5  16   1    3.10    0.56 
   5  16   1    2.42    0.56 
   5  16   1    4.36    0.66 
  -5  16  -1    2.93    0.42 
  -5  16  -1    2.10    0.70 
   6 -16   1   32.04    2.74 
   6 -16   1   28.69    2.76 
  -6 -16  -1   30.93    2.69 
  -6 -16  -1   30.04    2.77 
  -6  16  -1   28.32    2.83 
  -6  16  -1   31.90    2.65 
   6  16   1   31.07    2.75 
   6  16   1   29.72    2.77 
   6  16   1   33.65    2.74 
  -7 -16  -1    6.53    0.70 
  -7 -16  -1    4.74    0.83 
   7 -16   1    6.08    0.78 
   7 -16   1    7.69    0.86 
   7  16   1    6.07    0.81 
   7  16   1    6.99    0.83 
  -7  16  -1    5.16    0.94 
   7  16   1    6.43    0.80 
   8 -16   1    1.53    0.61 
  -8 -16  -1    1.28    0.62 
  -8 -16  -1    2.03    0.41 
   8 -16   1    2.62    0.56 
   8  16   1    1.62    0.58 
  -8  16  -1    0.94    0.73 
   8  16   1    2.46    0.62 
   8  16   1    1.75    0.52 
   9 -16   1    1.88    0.57 
   9 -16   1    1.80    0.63 
  -9 -16  -1    2.16    0.66 
   9  16   1    1.95    0.57 
   9  16   1    0.65    0.58 
   9  16   1    1.97    0.59 
  -9  16  -1    1.02    0.76 
  10 -16   1    2.20    0.62 
 -10 -16  -1    2.13    0.70 
  10 -16   1    3.17    0.70 
  10  16   1    1.51    0.62 
  10  16   1    1.53    0.62 
 -10  16  -1    0.92    0.77 
  10  16   1    3.40    0.63 
  11 -16   1    5.01    0.87 
  11 -16   1    4.59    0.79 
 -11 -16  -1    4.86    0.90 
  11  16   1    6.16    0.80 
  11  16   1    5.17    0.86 
 -11  16  -1    4.09    1.02 
 -12 -16  -1    0.88    0.77 
  12 -16   1    0.19    0.63 
  12 -16   1    0.52    0.67 
 -12  16  -1    0.11    0.80 
  12  16   1    0.21    0.57 
  12  16   1   -0.05    0.61 
  13 -16   1    2.27    0.76 
 -13 -16  -1    1.36    0.84 
  13  16   1    1.43    0.71 
 -13  16  -1    0.40    0.93 
  13  16   1    1.53    0.65 
  14 -16   1    0.68    0.77 
 -14 -16  -1   -0.21    0.81 
 -14  16  -1    0.27    0.95 
 -14  16  -1   -0.81    0.65 
  14  16   1   -0.22    0.63 
  14  16   1   -0.47    0.72 
 -14 -17   1    3.86    1.07 
  14 -17  -1    5.48    1.00 
 -14  17   1    4.95    1.10 
  14  17  -1    5.24    0.88 
  14  17  -1    4.78    0.90 
 -14  17   1    4.03    0.89 
  13 -17  -1    1.91    0.81 
 -13 -17   1    0.91    0.89 
 -13  17   1    1.24    0.91 
  13  17  -1    1.20    0.73 
  13  17  -1    1.98    0.66 
 -12 -17   1    0.68    0.76 
  12 -17  -1    0.82    0.75 
  12  17  -1    0.66    0.60 
  12  17  -1    0.39    0.65 
 -12  17   1   -0.41    0.90 
  11 -17  -1    4.06    0.87 
 -11 -17   1    3.19    0.88 
 -11  17   1    3.97    0.98 
  11  17  -1    6.24    0.82 
  11  17  -1    5.89    0.86 
  10 -17  -1    1.09    0.67 
 -10 -17   1    0.42    0.68 
  10 -17  -1    0.83    0.56 
 -10  17   1   -0.01    0.80 
  10  17  -1    0.13    0.59 
  10  17  -1    0.12    0.56 
  10  17  -1   -0.06    0.58 
   9 -17  -1   -0.22    0.60 
   9 -17  -1    0.23    0.50 
  -9 -17   1    0.36    0.64 
   9  17  -1   -0.34    0.55 
   9  17  -1    0.92    0.61 
   9  17  -1    0.10    0.51 
  -9  17   1    0.91    0.72 
  -8 -17   1    6.61    0.93 
   8 -17  -1    7.27    0.92 
   8 -17  -1    7.00    0.83 
   8  17  -1    6.05    0.84 
   8  17  -1    7.18    0.93 
  -8  17   1    5.74    0.98 
   8  17  -1    6.28    0.85 
   7 -17  -1   15.43    1.54 
   7 -17  -1   13.42    1.45 
  -7 -17   1   16.01    1.39 
  -7 -17   1   14.29    1.51 
  -7  17   1   14.66    1.63 
   7  17  -1   14.65    1.54 
   7  17  -1   13.56    1.47 
   7  17  -1   14.32    1.49 
   6 -17  -1    0.77    0.51 
   6 -17  -1    0.60    0.46 
  -6 -17   1    0.01    0.55 
  -6 -17   1   -0.27    0.33 
   6  17  -1    1.74    0.50 
  -6  17   1   -0.11    0.64 
   6  17  -1    0.48    0.54 
   6  17  -1    1.02    0.48 
  -6  17   1    0.65    0.32 
  -5 -17   1   12.76    1.17 
   5 -17  -1   10.07    1.22 
  -5 -17   1    9.98    1.23 
   5 -17  -1   10.97    1.22 
  -5  17   1    9.51    1.29 
   5  17  -1   12.09    1.35 
   5  17  -1   13.11    1.24 
  -5  17   1   13.19    1.13 
   5  17  -1   13.39    1.24 
   4 -17  -1    5.26    0.71 
  -4 -17   1    5.78    0.65 
  -4 -17   1    5.52    0.80 
   4 -17  -1    4.77    0.72 
  -4  17   1    5.16    0.84 
   4  17  -1    4.42    0.82 
  -4  17   1    6.22    0.62 
   4  17  -1    4.99    0.68 
   4  17  -1    5.54    0.73 
  -3 -17   1    5.31    0.78 
   3 -17  -1    3.54    0.66 
  -3 -17   1    5.27    0.60 
   3 -17  -1    5.59    0.68 
   3  17  -1    4.45    0.78 
   3  17  -1    4.98    0.64 
  -3  17   1    4.19    0.54 
   3  17  -1    4.98    0.66 
  -3  17   1    3.86    0.79 
   2 -17  -1   -0.27    0.46 
  -2 -17   1   -0.06    0.51 
   2 -17  -1   -0.23    0.41 
  -2 -17   1    0.30    0.37 
  -2  17   1   -0.06    0.31 
   2  17  -1    0.03    0.36 
  -2  17   1   -0.06    0.38 
   2  17  -1   -0.76    0.39 
   2  17  -1   -0.11    0.57 
  -2  17   1    1.13    0.60 
  -1 -17   1    2.63    0.59 
   1 -17  -1    2.61    0.51 
  -1 -17   1    1.91    0.45 
   1 -17  -1    2.54    0.56 
   1  17  -1    1.19    0.67 
  -1  17   1    3.31    0.69 
   1  17  -1    2.18    0.45 
  -1  17   1    2.35    0.48 
  -1  17   1    1.85    0.41 
   1  17  -1    2.65    0.49 
   0 -17   1    8.96    1.09 
   0 -17  -1   10.64    1.11 
   0 -17   1   11.05    1.08 
   0 -17  -1   10.54    1.09 
   0  17   1    9.02    1.17 
   0  17  -1   11.44    1.05 
   0  17   1   11.14    1.06 
   0  17  -1   11.03    1.11 
   0  17  -1    8.72    1.16 
   0  17   1   10.72    1.13 
  -1 -17  -1    2.88    0.65 
  -1 -17  -1    3.87    0.56 
   1 -17   1    3.16    0.64 
   1 -17   1    3.22    0.55 
  -1  17  -1    3.25    0.73 
  -1  17  -1    3.84    0.57 
  -1  17  -1    4.50    0.52 
   1  17   1    3.73    0.54 
   1  17   1    4.60    0.61 
   1  17   1    3.65    0.74 
  -2 -17  -1    2.32    0.59 
   2 -17   1    0.84    0.52 
  -2 -17  -1    2.02    0.45 
   2 -17   1    2.48    0.48 
  -2  17  -1    2.26    0.38 
   2  17   1    1.95    0.50 
   2  17   1    1.71    0.63 
   2  17   1    1.91    0.45 
  -2  17  -1    2.10    0.46 
  -2  17  -1    2.68    0.66 
   3 -17   1   -0.11    0.47 
   3 -17   1    1.00    0.46 
  -3 -17  -1    0.59    0.55 
  -3 -17  -1    0.33    0.38 
  -3  17  -1    1.09    0.32 
   3  17   1    0.23    0.45 
   3  17   1   -0.10    0.58 
  -3  17  -1   -0.07    0.59 
   3  17   1    0.13    0.41 
   4 -17   1   20.27    1.91 
  -4 -17  -1   20.22    1.98 
  -4 -17  -1   21.56    1.85 
   4 -17   1   20.98    1.89 
   4  17   1   19.54    1.87 
   4  17   1   18.98    1.89 
  -4  17  -1   20.27    1.80 
   4  17   1   21.35    2.00 
  -4  17  -1   20.00    2.02 
  -5 -17  -1   10.42    1.09 
  -5 -17  -1    9.98    1.15 
   5 -17   1   11.72    1.17 
   5 -17   1   11.27    1.20 
   5  17   1   11.82    1.19 
   5  17   1    9.26    1.09 
  -5  17  -1    9.30    1.22 
  -5  17  -1   10.98    1.02 
   5  17   1   10.31    1.10 
   6 -17   1    1.34    0.54 
  -6 -17  -1    1.15    0.57 
   6 -17   1    0.88    0.51 
  -6 -17  -1    1.22    0.39 
   6  17   1    1.19    0.51 
  -6  17  -1    1.73    0.43 
   6  17   1    1.60    0.59 
  -6  17  -1    0.83    0.67 
   6  17   1    0.83    0.51 
  -7 -17  -1    2.98    0.48 
  -7 -17  -1    2.71    0.66 
   7 -17   1    3.15    0.61 
   7 -17   1    3.02    0.64 
  -7  17  -1    2.26    0.77 
   7  17   1    3.06    0.61 
   7  17   1    1.41    0.55 
   7  17   1    3.61    0.67 
   8 -17   1    0.85    0.59 
  -8 -17  -1    1.23    0.61 
   8 -17   1    1.16    0.53 
   8  17   1    1.03    0.57 
   8  17   1    0.34    0.59 
   8  17   1    0.37    0.53 
  -8  17  -1    1.41    0.73 
  -9 -17  -1    1.07    0.65 
   9 -17   1   -0.22    0.57 
   9 -17   1   -0.04    0.52 
   9  17   1    0.29    0.56 
   9  17   1    0.58    0.59 
   9  17   1    0.54    0.53 
  -9  17  -1    1.00    0.78 
  10 -17   1    6.76    0.93 
  10 -17   1    7.17    1.01 
 -10 -17  -1    6.87    1.04 
  10  17   1    8.22    0.95 
 -10  17  -1    7.00    1.15 
  10  17   1    8.49    0.98 
  11 -17   1    3.63    0.79 
  11 -17   1    3.12    0.73 
 -11 -17  -1    3.16    0.82 
 -11  17  -1    3.43    0.98 
  11  17   1    2.87    0.76 
  11  17   1    4.46    0.73 
 -12 -17  -1    0.19    0.79 
  12 -17   1    1.95    0.73 
  12  17   1    2.59    0.65 
  12  17   1    1.10    0.69 
 -12  17  -1    0.96    0.97 
 -13 -17  -1    0.98    0.81 
  13 -17   1    1.40    0.80 
  13  17   1    0.03    0.69 
  13  17   1    0.92    0.63 
 -13  17  -1    0.21    0.96 
 -14 -17  -1    0.10    0.86 
  14 -17   1   -0.39    0.79 
 -14  17  -1    0.16    0.67 
  14  17   1    1.77    0.68 
 -14  17  -1    0.67    1.01 
  14  17   1   -0.59    0.68 
  14 -18  -1    0.17    0.81 
 -14 -18   1   -0.46    0.93 
 -14  18   1   -0.39    0.97 
  14  18  -1    1.43    0.70 
  14  18  -1    0.63    0.76 
  13 -18  -1    3.03    0.89 
 -13 -18   1    1.23    0.88 
  13  18  -1    2.52    0.78 
 -13  18   1    0.86    1.02 
  13  18  -1    2.39    0.72 
  12 -18  -1    4.02    0.93 
 -12 -18   1    4.79    1.00 
 -12  18   1    2.49    1.03 
  12  18  -1    4.64    0.85 
  12  18  -1    6.21    0.85 
 -11 -18   1    0.08    0.75 
  11 -18  -1   -0.16    0.72 
  11  18  -1   -0.02    0.64 
 -11  18   1    0.16    0.86 
  11  18  -1    0.48    0.59 
  10 -18  -1    0.33    0.67 
  10 -18  -1    0.31    0.58 
 -10 -18   1    0.23    0.68 
  10  18  -1    1.23    0.67 
  10  18  -1    1.10    0.64 
 -10  18   1   -0.90    0.79 
  10  18  -1    0.15    0.58 
  -9 -18   1    1.41    0.70 
   9 -18  -1    0.96    0.55 
   9 -18  -1    1.50    0.68 
   9  18  -1    1.47    0.57 
  -9  18   1    0.39    0.80 
   9  18  -1    0.84    0.59 
   9  18  -1    1.36    0.65 
   8 -18  -1   11.60    1.16 
   8 -18  -1    9.24    1.21 
  -8 -18   1   11.19    1.26 
  -8  18   1    9.34    1.30 
   8  18  -1   11.47    1.18 
   8  18  -1   10.13    1.22 
   8  18  -1   11.36    1.19 
   7 -18  -1    2.64    0.67 
  -7 -18   1    0.76    0.65 
   7 -18  -1    2.86    0.59 
   7  18  -1    1.70    0.57 
  -7  18   1    2.68    0.79 
   7  18  -1    2.38    0.70 
   7  18  -1    1.36    0.58 
   6 -18  -1    1.79    0.53 
  -6 -18   1    1.02    0.40 
   6 -18  -1    0.17    0.54 
  -6 -18   1    1.44    0.63 
  -6  18   1    0.84    0.73 
   6  18  -1    1.21    0.51 
   6  18  -1    1.64    0.64 
  -6  18   1    1.40    0.36 
   6  18  -1    0.87    0.51 
   5 -18  -1   -0.54    0.47 
   5 -18  -1   -0.59    0.47 
  -5 -18   1    0.31    0.59 
  -5 -18   1    0.16    0.38 
  -5  18   1   -0.27    0.64 
   5  18  -1    0.18    0.48 
   5  18  -1   -0.16    0.58 
  -5  18   1    0.78    0.34 
   5  18  -1    0.18    0.46 
   4 -18  -1    1.30    0.51 
  -4 -18   1    0.99    0.62 
  -4 -18   1    1.01    0.41 
   4 -18  -1    1.18    0.52 
   4  18  -1    0.72    0.48 
  -4  18   1    1.29    0.36 
   4  18  -1    1.20    0.62 
  -4  18   1    0.91    0.68 
   4  18  -1    0.66    0.46 
   3 -18  -1    2.48    0.55 
   3 -18  -1    1.62    0.58 
  -3 -18   1    2.08    0.65 
  -3 -18   1    3.03    0.50 
  -3  18   1    2.76    0.44 
   3  18  -1    3.20    0.73 
   3  18  -1    2.77    0.52 
   3  18  -1    2.54    0.55 
  -3  18   1    3.79    0.74 
  -2 -18   1    9.41    0.90 
   2 -18  -1    7.95    0.96 
  -2 -18   1    9.05    1.02 
   2 -18  -1    9.01    0.95 
   2  18  -1    7.32    0.87 
  -2  18   1    8.92    1.07 
   2  18  -1    8.54    0.93 
   2  18  -1    8.43    1.06 
  -2  18   1    7.48    0.89 
  -2  18   1    9.14    0.92 
   1 -18  -1    4.37    0.68 
  -1 -18   1    5.90    0.80 
   1 -18  -1    4.86    0.76 
  -1 -18   1    4.96    0.65 
  -1  18   1    5.87    0.63 
  -1  18   1    4.33    0.67 
   1  18  -1    5.41    0.64 
  -1  18   1    5.30    0.84 
   1  18  -1    6.09    0.88 
   1  18  -1    5.60    0.70 
   0 -18   1    1.70    0.58 
   0 -18  -1    1.32    0.54 
   0 -18  -1    1.19    0.44 
   0 -18   1    1.37    0.45 
   0  18  -1    1.01    0.66 
   0  18  -1    1.48    0.46 
   0  18   1    1.64    0.67 
   0  18   1    1.84    0.41 
   0  18  -1    1.26    0.40 
   0  18   1    2.52    0.50 
  -1 -18  -1    0.74    0.41 
   1 -18   1    0.52    0.51 
  -1 -18  -1    0.36    0.51 
   1 -18   1    1.28    0.44 
  -1  18  -1    0.37    0.36 
   1  18   1    0.66    0.39 
   1  18   1    1.62    0.65 
   1  18   1    0.65    0.44 
  -1  18  -1    0.64    0.42 
  -1  18  -1    0.38    0.63 
  -2 -18  -1    2.82    0.50 
  -2 -18  -1    2.27    0.62 
   2 -18   1    1.64    0.58 
   2 -18   1    3.28    0.54 
   2  18   1    2.08    0.49 
   2  18   1    2.60    0.54 
  -2  18  -1    2.26    0.42 
  -2  18  -1    2.91    0.73 
  -2  18  -1    3.47    0.51 
   2  18   1    3.33    0.73 
  -3 -18  -1    0.68    0.59 
   3 -18   1    0.07    0.49 
   3 -18   1    0.06    0.45 
  -3 -18  -1    0.86    0.40 
  -3  18  -1    0.09    0.64 
  -3  18  -1    0.49    0.32 
   3  18   1    0.54    0.44 
   3  18   1    0.63    0.64 
  -3  18  -1   -0.12    0.39 
   3  18   1   -0.34    0.47 
   4 -18   1    0.70    0.49 
  -4 -18  -1    0.60    0.57 
  -4 -18  -1    0.66    0.39 
   4 -18   1    0.89    0.49 
  -4  18  -1    0.19    0.32 
   4  18   1    1.20    0.66 
   4  18   1    0.45    0.48 
   4  18   1    0.94    0.46 
  -4  18  -1    0.81    0.65 
  -5 -18  -1    3.25    0.68 
  -5 -18  -1    2.96    0.50 
   5 -18   1    3.65    0.61 
   5 -18   1    1.69    0.58 
   5  18   1    2.54    0.58 
   5  18   1    3.49    0.72 
  -5  18  -1    1.83    0.74 
   5  18   1    2.22    0.59 
  -5  18  -1    2.25    0.41 
   6 -18   1   -0.32    0.51 
  -6 -18  -1    0.47    0.59 
  -6 -18  -1    0.54    0.39 
   6 -18   1    0.49    0.53 
   6  18   1    0.19    0.60 
  -6  18  -1    0.68    0.71 
   6  18   1    0.69    0.52 
   6  18   1    0.61    0.53 
   7 -18   1   -0.19    0.51 
  -7 -18  -1   -0.08    0.37 
  -7 -18  -1    1.02    0.61 
   7 -18   1    0.09    0.54 
   7  18   1    0.04    0.59 
  -7  18  -1   -0.06    0.71 
   7  18   1   -0.34    0.53 
   7  18   1    0.38    0.54 
   8 -18   1    0.99    0.63 
  -8 -18  -1    0.87    0.62 
   8 -18   1    0.70    0.54 
   8  18   1    0.85    0.61 
  -8  18  -1    0.27    0.78 
   8  18   1    0.34    0.57 
   8  18   1    1.10    0.53 
   9 -18   1    4.38    0.84 
  -9 -18  -1    4.39    0.85 
   9 -18   1    4.61    0.75 
   9  18   1    5.49    0.79 
  -9  18  -1    4.33    0.99 
   9  18   1    4.25    0.79 
   9  18   1    4.33    0.78 
  10 -18   1    0.01    0.68 
 -10 -18  -1    0.76    0.71 
  10 -18   1    3.19    0.68 
 -10  18  -1    1.35    0.85 
  10  18   1    2.01    0.67 
  10  18   1    1.48    0.64 
  11 -18   1   -0.23    0.67 
 -11 -18  -1   -0.72    0.71 
  11 -18   1    0.30    0.62 
  11  18   1    0.90    0.65 
  11  18   1    0.94    0.67 
 -11  18  -1   -0.06    0.84 
 -12 -18  -1   -0.57    0.79 
  12 -18   1   -0.79    0.70 
 -12  18  -1    1.33    0.95 
  12  18   1   -0.05    0.67 
  12  18   1    0.10    0.65 
 -13 -18  -1    0.43    0.83 
  13 -18   1   -0.24    0.78 
  13  18   1    0.63    0.66 
  13  18   1   -0.25    0.69 
 -13  18  -1    0.37    0.92 
  14 -18   1    2.94    0.89 
 -14 -18  -1    1.16    0.93 
 -14  18  -1    0.40    1.07 
  14  18   1    2.90    0.85 
 -14  18  -1    1.88    0.73 
  14  18   1    1.97    0.72 
 -13 -19   1   -0.35    0.86 
  13 -19  -1    0.14    0.81 
  13  19  -1   -0.42    0.70 
  13  19  -1    0.59    0.69 
 -13  19   1    0.39    1.04 
  12 -19  -1    0.78    0.76 
 -12 -19   1   -0.56    0.85 
  12  19  -1    0.64    0.69 
  12  19  -1    0.33    0.66 
 -12  19   1   -0.10    0.98 
 -11 -19   1    0.83    0.81 
  11 -19  -1    0.65    0.74 
 -11  19   1   -0.10    0.93 
  11  19  -1    1.26    0.72 
  11  19  -1    0.61    0.68 
  10 -19  -1   -0.23    0.69 
 -10 -19   1   -0.12    0.71 
 -10  19   1   -1.20    0.89 
  10  19  -1   -1.26    0.61 
  10  19  -1    0.82    0.61 
  10  19  -1    0.35    0.68 
  -9 -19   1    0.64    0.76 
   9 -19  -1    2.40    0.75 
   9 -19  -1    1.53    0.60 
   9  19  -1    2.30    0.66 
  -9  19   1    2.95    0.90 
   9  19  -1    1.72    0.62 
   9  19  -1    2.06    0.71 
   8 -19  -1   34.52    2.99 
   8 -19  -1   30.06    3.02 
  -8 -19   1   31.82    3.08 
  -8  19   1   30.32    3.10 
   8  19  -1   33.51    3.03 
   8  19  -1   35.70    3.00 
   8  19  -1   34.91    3.00 
   7 -19  -1    0.41    0.59 
   7 -19  -1    1.41    0.55 
  -7 -19   1    0.70    0.64 
   7  19  -1    0.53    0.66 
   7  19  -1    0.56    0.55 
  -7  19   1    0.90    0.80 
   7  19  -1    0.94    0.55 
   6 -19  -1    0.32    0.52 
  -6 -19   1    1.86    0.69 
  -6 -19   1    0.46    0.39 
   6 -19  -1    0.11    0.55 
   6  19  -1   -0.08    0.64 
  -6  19   1    0.69    0.76 
   6  19  -1    0.01    0.52 
   6  19  -1   -0.01    0.49 
   5 -19  -1    0.52    0.50 
   5 -19  -1    0.48    0.56 
  -5 -19   1    0.18    0.63 
  -5 -19   1    0.12    0.41 
  -5  19   1    0.55    0.71 
   5  19  -1    1.17    0.64 
   5  19  -1    0.69    0.49 
  -5  19   1    0.49    0.36 
   5  19  -1    1.77    0.54 
  -4 -19   1    0.93    0.41 
   4 -19  -1    0.49    0.51 
  -4 -19   1    0.65    0.66 
   4 -19  -1    0.39    0.53 
   4  19  -1    1.56    0.51 
   4  19  -1    0.83    0.50 
  -4  19   1    0.54    0.69 
  -4  19   1    0.74    0.37 
   4  19  -1    0.17    0.68 
  -3 -19   1    3.28    0.76 
   3 -19  -1    4.60    0.67 
  -3 -19   1    5.05    0.61 
   3 -19  -1    2.50    0.68 
  -3  19   1    4.58    0.54 
  -3  19   1    3.61    0.80 
   3  19  -1    3.08    0.79 
   3  19  -1    4.11    0.60 
   3  19  -1    4.16    0.66 
  -2 -19   1   -0.47    0.58 
  -2 -19   1    0.32    0.41 
   2 -19  -1    0.05    0.51 
   2 -19  -1   -0.13    0.46 
  -2  19   1   -0.04    0.43 
   2  19  -1    1.36    0.47 
   2  19  -1    0.22    0.69 
  -2  19   1    0.25    0.64 
  -2  19   1    0.38    0.35 
   2  19  -1    0.12    0.39 
   1 -19  -1    7.82    0.99 
  -1 -19   1    9.03    1.03 
  -1 -19   1    9.11    0.92 
   1 -19  -1    9.81    0.96 
  -1  19   1    7.91    0.87 
   1  19  -1    8.66    1.11 
  -1  19   1    7.97    1.06 
   1  19  -1    7.87    0.89 
  -1  19   1    8.31    0.92 
   1  19  -1    8.95    0.95 
   0 -19  -1    3.60    0.63 
   0 -19   1    4.52    0.64 
   0 -19   1    4.94    0.76 
   0 -19  -1    5.20    0.73 
   0  19  -1    4.86    0.58 
   0  19   1    4.40    0.60 
   0  19   1    4.93    0.85 
   0  19  -1    4.19    0.63 
   0  19   1    3.15    0.63 
   0  19  -1    4.51    0.82 
  -1 -19  -1    5.71    0.71 
   1 -19   1    6.65    0.82 
  -1 -19  -1    5.82    0.81 
   1 -19   1    4.35    0.70 
   1  19   1    5.81    0.75 
  -1  19  -1    6.59    0.73 
  -1  19  -1    5.90    0.66 
  -1  19  -1    5.55    0.90 
   1  19   1    5.06    0.68 
   1  19   1    5.54    0.91 
   2 -19   1   -0.38    0.52 
  -2 -19  -1   -0.24    0.54 
  -2 -19  -1   -0.35    0.40 
   2 -19   1    0.22    0.44 
   2  19   1   -0.80    0.64 
  -2  19  -1    0.43    0.35 
  -2  19  -1    0.79    0.43 
  -2  19  -1    0.88    0.69 
   2  19   1    0.08    0.46 
   2  19   1    0.02    0.42 
   3 -19   1    3.99    0.80 
  -3 -19  -1    6.08    0.74 
  -3 -19  -1    5.80    0.88 
   3 -19   1    6.40    0.80 
   3  19   1    6.81    0.77 
   3  19   1    6.06    0.79 
  -3  19  -1    7.00    0.76 
  -3  19  -1    7.48    0.68 
  -3  19  -1    5.04    0.90 
   3  19   1    4.48    0.91 
  -4 -19  -1   33.56    2.82 
  -4 -19  -1   31.69    2.92 
   4 -19   1   35.89    2.89 
   4 -19   1   28.81    2.87 
  -4  19  -1   32.91    2.76 
  -4  19  -1   28.79    2.94 
   4  19   1   33.43    2.87 
   4  19   1   29.84    2.95 
   4  19   1   31.78    2.84 
   5 -19   1   11.11    1.23 
   5 -19   1   11.44    1.29 
  -5 -19  -1   10.35    1.27 
  -5 -19  -1   12.19    1.21 
  -5  19  -1   11.91    1.38 
   5  19   1   11.27    1.31 
   5  19   1   12.56    1.28 
   5  19   1   12.43    1.29 
  -6 -19  -1    4.52    0.80 
   6 -19   1    3.49    0.74 
  -6 -19  -1    5.18    0.63 
   6 -19   1    5.62    0.76 
   6  19   1    5.82    0.74 
   6  19   1    4.24    0.72 
   6  19   1    3.28    0.79 
  -6  19  -1    2.52    0.86 
  -7 -19  -1    0.12    0.61 
   7 -19   1   -0.40    0.59 
   7 -19   1    0.34    0.55 
  -7 -19  -1   -0.41    0.61 
   7  19   1   -0.30    0.52 
   7  19   1   -0.14    0.53 
   7  19   1    0.16    0.63 
  -7  19  -1   -0.99    0.72 
   8 -19   1    0.15    0.63 
  -8 -19  -1   -0.09    0.66 
   8 -19   1    0.07    0.56 
   8  19   1   -0.16    0.59 
  -8  19  -1    0.00    0.78 
   8  19   1   -0.20    0.57 
   8  19   1    1.19    0.65 
  -9 -19  -1    1.51    0.72 
   9 -19   1    1.40    0.72 
   9 -19   1    2.43    0.66 
   9  19   1    2.16    0.65 
  -9  19  -1    1.49    0.88 
   9  19   1    2.08    0.67 
   9  19   1    1.66    0.68 
  10 -19   1    4.60    0.82 
  10 -19   1    4.73    0.90 
 -10 -19  -1    5.27    0.96 
 -10  19  -1    6.30    1.10 
  10  19   1    4.89    0.82 
  10  19   1    4.62    0.86 
  11 -19   1    0.71    0.72 
 -11 -19  -1   -0.49    0.75 
  11  19   1   -0.21    0.66 
  11  19   1   -0.15    0.65 
 -11  19  -1    1.03    0.96 
 -12 -19  -1    1.36    0.84 
  12 -19   1    0.33    0.75 
  12  19   1    0.41    0.71 
 -12  19  -1   -0.03    0.94 
  12  19   1    1.05    0.68 
  13 -19   1    1.97    0.89 
 -13 -19  -1    0.87    0.94 
  13  19   1    3.80    0.83 
  13  19   1    1.11    0.69 
 -13  19  -1    2.37    1.05 
 -13 -20   1   -0.11    0.91 
  13 -20  -1    1.54    0.85 
  13  20  -1   -0.24    0.74 
 -13  20   1    1.16    1.11 
  13  20  -1    1.95    0.77 
 -12 -20   1   -0.09    0.85 
  12 -20  -1   -0.80    0.76 
  12  20  -1    0.49    0.72 
  12  20  -1    0.96    0.68 
 -12  20   1    0.78    1.05 
 -11 -20   1    2.22    0.89 
  11 -20  -1    1.21    0.80 
  11  20  -1    2.64    0.78 
  11  20  -1    2.01    0.75 
 -11  20   1    2.15    0.99 
 -10 -20   1    0.05    0.75 
  10 -20  -1   -1.37    0.67 
 -10  20   1   -0.24    0.89 
  10  20  -1    0.08    0.69 
  10  20  -1    0.42    0.65 
  10  20  -1   -0.39    0.73 
   9 -20  -1    1.51    0.81 
   9 -20  -1    1.29    0.70 
  -9 -20   1    1.07    0.77 
   9  20  -1   -0.11    0.62 
  -9  20   1    1.96    0.91 
   9  20  -1    0.66    0.61 
   9  20  -1    1.34    0.72 
   8 -20  -1   -0.25    0.65 
  -8 -20   1   -0.32    0.69 
   8 -20  -1    0.21    0.60 
   8  20  -1    0.19    0.60 
  -8  20   1    0.62    0.84 
   8  20  -1    0.30    0.69 
   8  20  -1    0.73    0.58 
   7 -20  -1    1.80    0.59 
   7 -20  -1    0.16    0.60 
  -7 -20   1    0.56    0.70 
   7  20  -1   -0.15    0.65 
  -7  20   1    0.14    0.80 
   7  20  -1   -0.46    0.54 
   7  20  -1    0.04    0.58 
  -6 -20   1    0.85    0.68 
   6 -20  -1    1.65    0.65 
   6 -20  -1    1.26    0.59 
   6  20  -1    1.56    0.74 
  -6  20   1    3.13    0.82 
   6  20  -1    1.42    0.57 
   6  20  -1    1.14    0.59 
   5 -20  -1    2.59    0.60 
  -5 -20   1    1.75    0.72 
   5 -20  -1    1.65    0.62 
  -5 -20   1    2.81    0.50 
   5  20  -1    0.88    0.55 
  -5  20   1    2.25    0.53 
   5  20  -1    0.83    0.58 
   5  20  -1    2.15    0.77 
  -5  20   1    2.35    0.81 
   4 -20  -1    2.94    0.66 
   4 -20  -1    2.03    0.64 
  -4 -20   1    3.02    0.76 
  -4 -20   1    3.04    0.54 
   4  20  -1    3.34    0.65 
  -4  20   1    4.45    0.52 
   4  20  -1    1.92    0.78 
  -4  20   1    2.67    0.78 
   4  20  -1    3.95    0.61 
  -3 -20   1    2.76    0.49 
  -3 -20   1    1.06    0.67 
   3 -20  -1    1.72    0.56 
   3 -20  -1    1.21    0.59 
   3  20  -1    0.86    0.77 
  -3  20   1    1.78    0.75 
  -3  20   1    0.02    0.48 
  -3  20   1    1.62    0.41 
   3  20  -1    1.10    0.53 
   3  20  -1    1.67    0.48 
  -2 -20   1    1.47    0.65 
  -2 -20   1    1.69    0.47 
   2 -20  -1    1.31    0.58 
   2 -20  -1    0.77    0.51 
  -2  20   1    1.93    0.49 
  -2  20   1    2.38    0.73 
   2  20  -1    1.45    0.52 
   2  20  -1    1.23    0.46 
  -2  20   1    1.03    0.39 
   2  20  -1    2.33    0.74 
   1 -20  -1   21.63    1.99 
  -1 -20   1   20.47    1.90 
  -1 -20   1   21.90    2.01 
   1 -20  -1   18.22    1.92 
  -1  20   1   18.72    2.05 
   1  20  -1   18.94    1.86 
  -1  20   1   22.18    1.92 
  -1  20   1   21.54    1.86 
   1  20  -1   20.16    1.92 
   1  20  -1   20.48    2.12 
   0 -20  -1   13.86    1.41 
   0 -20   1   14.10    1.40 
   0 -20   1   17.12    1.55 
   0 -20  -1   14.14    1.47 
   0  20   1   15.52    1.65 
   0  20  -1   15.80    1.68 
   0  20   1   12.81    1.35 
   0  20   1   12.36    1.40 
   0  20  -1   12.53    1.33 
   0  20  -1   12.86    1.39 
   1 -20   1    5.78    0.90 
   1 -20   1    6.51    0.82 
  -1 -20  -1    7.53    0.83 
  -1 -20  -1    6.83    0.92 
   1  20   1    6.85    0.78 
   1  20   1    7.13    0.84 
   1  20   1    5.31    1.01 
  -1  20  -1    7.62    0.82 
  -1  20  -1    7.93    0.77 
  -1  20  -1    5.55    0.98 
   2 -20   1    0.13    0.54 
  -2 -20  -1    0.99    0.61 
  -2 -20  -1    0.72    0.45 
   2 -20   1    0.57    0.47 
  -2  20  -1    0.28    0.44 
   2  20   1    0.48    0.72 
   2  20   1    0.40    0.51 
  -2  20  -1   -0.47    0.66 
   2  20   1    0.43    0.44 
  -2  20  -1    0.27    0.35 
   3 -20   1    0.48    0.58 
  -3 -20  -1    1.19    0.67 
  -3 -20  -1    2.02    0.48 
   3 -20   1    1.69    0.56 
  -3  20  -1    1.90    0.39 
   3  20   1    1.02    0.54 
   3  20   1    1.16    0.48 
  -3  20  -1    1.99    0.49 
   3  20   1    1.10    0.71 
  -3  20  -1    1.07    0.71 
   4 -20   1   13.02    1.83 
  -4 -20  -1   18.87    1.93 
   4 -20   1   18.49    1.84 
  -4 -20  -1   20.51    1.77 
  -4  20  -1   18.61    1.77 
   4  20   1   20.18    1.81 
   4  20   1   21.13    1.83 
  -4  20  -1   20.20    2.03 
   4  20   1   17.60    1.99 
  -4  20  -1   19.87    1.71 
   5 -20   1    0.96    0.59 
  -5 -20  -1    1.37    0.47 
   5 -20   1    1.40    0.58 
  -5 -20  -1    1.08    0.67 
   5  20   1    0.47    0.55 
  -5  20  -1    1.20    0.76 
   5  20   1    1.06    0.56 
   5  20   1    0.25    0.66 
  -6 -20  -1   23.17    1.90 
  -6 -20  -1   18.91    2.09 
   6 -20   1   19.54    1.98 
   6 -20   1   19.83    2.00 
   6  20   1   19.94    1.99 
   6  20   1   22.19    1.96 
  -6  20  -1   19.35    2.12 
   6  20   1   18.45    2.06 
   7 -20   1    5.98    0.90 
  -7 -20  -1    5.97    0.96 
   7 -20   1    6.37    0.87 
   7  20   1    5.08    0.83 
   7  20   1    6.59    0.87 
   7  20   1    6.79    0.95 
  -7  20  -1    5.88    1.05 
   8 -20   1    1.46    0.68 
   8 -20   1    2.26    0.65 
  -8 -20  -1    1.57    0.72 
   8  20   1    1.97    0.72 
   8  20   1    1.77    0.64 
   8  20   1    2.15    0.64 
  -8  20  -1    1.12    0.87 
  -9 -20  -1   -0.09    0.72 
   9 -20   1   -0.72    0.66 
   9 -20   1    0.93    0.63 
   9  20   1    0.16    0.67 
  -9  20  -1   -1.47    0.85 
   9  20   1    0.60    0.64 
   9  20   1    0.90    0.63 
 -10 -20  -1    3.35    0.93 
  10 -20   1    3.74    0.87 
  10 -20   1    5.49    0.88 
 -10  20  -1    5.38    1.14 
  10  20   1    4.54    0.84 
  10  20   1    5.61    0.86 
 -11 -20  -1    0.61    0.87 
  11 -20   1    2.46    0.83 
  11  20   1    2.43    0.74 
  11  20   1    2.66    0.78 
 -11  20  -1    1.63    1.04 
 -12 -20  -1    0.25    0.88 
  12 -20   1    0.86    0.78 
 -12  20  -1   -0.44    0.97 
  12  20   1   -0.48    0.76 
  12  20   1   -0.15    0.66 
  13 -20   1   -0.04    0.79 
 -13 -20  -1    0.21    0.89 
  13  20   1    0.86    0.78 
  13  20   1   -0.68    0.68 
 -13  20  -1    1.07    1.03 
 -13 -21   1    0.21    0.96 
  13 -21  -1   -0.95    0.87 
  13  21  -1   -0.93    0.74 
  13  21  -1   -0.81    0.79 
 -13  21   1   -1.38    1.02 
 -12 -21   1    0.38    0.92 
  12 -21  -1   -1.09    0.81 
 -12  21   1   -0.09    1.01 
  12  21  -1    0.23    0.68 
  12  21  -1   -0.41    0.75 
  11 -21  -1    5.23    0.99 
 -11 -21   1    4.05    1.02 
  11  21  -1    5.14    0.93 
 -11  21   1    5.84    1.19 
  11  21  -1    4.36    0.94 
  10 -21  -1    6.93    1.04 
 -10 -21   1    6.32    1.09 
 -10  21   1    6.50    1.20 
  10  21  -1    5.27    0.94 
  10  21  -1    5.63    0.92 
  -9 -21   1    1.84    0.87 
   9 -21  -1    2.10    0.79 
   9  21  -1    4.11    0.85 
  -9  21   1    2.35    1.04 
   9  21  -1    1.84    0.71 
   9  21  -1    3.29    0.74 
   8 -21  -1    7.83    1.12 
   8 -21  -1    7.18    1.01 
  -8 -21   1    8.56    1.16 
   8  21  -1   10.91    1.10 
  -8  21   1    8.43    1.31 
   8  21  -1    8.36    1.06 
   8  21  -1    8.06    1.13 
   7 -21  -1    2.81    0.67 
   7 -21  -1    1.96    0.72 
  -7 -21   1    2.20    0.80 
   7  21  -1    0.90    0.75 
  -7  21   1    2.26    0.90 
   7  21  -1    2.63    0.67 
   7  21  -1    2.96    0.66 
   6 -21  -1    4.13    0.79 
  -6 -21   1    4.44    0.89 
   6 -21  -1    4.68    0.77 
   6  21  -1    4.31    0.74 
  -6  21   1    3.43    0.96 
   6  21  -1    4.85    0.91 
   6  21  -1    3.57    0.74 
   5 -21  -1   12.87    1.47 
  -5 -21   1   16.70    1.40 
  -5 -21   1   12.71    1.50 
   5 -21  -1   12.69    1.43 
   5  21  -1   12.03    1.51 
  -5  21   1   13.16    1.55 
   5  21  -1   13.03    1.41 
   5  21  -1   15.77    1.47 
  -4 -21   1    0.12    0.43 
  -4 -21   1    0.10    0.67 
   4 -21  -1   -0.84    0.55 
   4 -21  -1    0.89    0.55 
   4  21  -1   -0.93    0.70 
   4  21  -1    0.58    0.49 
  -4  21   1    0.70    0.38 
   4  21  -1    0.24    0.55 
  -4  21   1    0.14    0.71 
   3 -21  -1    2.64    0.71 
  -3 -21   1    4.68    0.83 
   3 -21  -1    4.28    0.71 
  -3 -21   1    4.30    0.63 
   3  21  -1    3.46    0.88 
   3  21  -1    3.72    0.70 
  -3  21   1    5.64    0.68 
   3  21  -1    4.62    0.66 
  -3  21   1    5.12    0.58 
  -3  21   1    3.09    0.85 
   2 -21  -1    1.40    0.53 
  -2 -21   1    1.64    0.49 
   2 -21  -1    1.75    0.63 
  -2 -21   1    1.15    0.65 
   2  21  -1    1.38    0.77 
  -2  21   1    2.33    0.51 
   2  21  -1    2.00    0.50 
   2  21  -1    1.41    0.53 
  -2  21   1   -0.15    0.70 
  -2  21   1    1.35    0.43 
  -1 -21   1    8.95    1.14 
  -1 -21   1    9.37    1.04 
   1 -21  -1   10.72    1.14 
   1 -21  -1    9.50    1.08 
  -1  21   1   10.46    1.11 
  -1  21   1    8.46    1.22 
   1  21  -1    7.25    1.20 
  -1  21   1   11.81    1.06 
   1  21  -1   10.79    1.08 
   1  21  -1   11.17    1.09 
   0 -21  -1    2.66    0.57 
   0 -21   1    3.87    0.60 
   0 -21  -1    2.53    0.69 
   0 -21   1    2.76    0.70 
   0  21   1    2.17    0.80 
   0  21  -1    3.08    0.51 
   0  21   1    2.03    0.58 
   0  21  -1    3.59    0.60 
   0  21   1    2.75    0.54 
   0  21  -1    4.01    0.84 
   1 -21   1    0.36    0.49 
   1 -21   1    0.87    0.63 
  -1 -21  -1    1.79    0.50 
  -1 -21  -1    1.34    0.60 
   1  21   1    1.16    0.75 
  -1  21  -1    1.06    0.50 
  -1  21  -1    2.35    0.77 
   1  21   1    0.85    0.54 
   1  21   1    1.66    0.46 
  -1  21  -1    0.98    0.41 
  -2 -21  -1    0.65    0.63 
  -2 -21  -1    0.86    0.47 
   2 -21   1    1.46    0.51 
   2 -21   1    1.05    0.59 
  -2  21  -1    0.92    0.46 
  -2  21  -1    0.37    0.71 
   2  21   1    0.71    0.75 
  -2  21  -1    0.83    0.40 
   2  21   1    0.62    0.45 
   2  21   1    0.86    0.55 
  -3 -21  -1    1.38    0.65 
  -3 -21  -1    0.75    0.46 
   3 -21   1    0.36    0.61 
   3 -21   1    0.88    0.53 
  -3  21  -1   -0.28    0.71 
   3  21   1    1.28    0.51 
   3  21   1    0.74    0.72 
  -3  21  -1   -0.08    0.44 
   3  21   1   -0.18    0.53 
  -3  21  -1    0.28    0.37 
   4 -21   1   12.82    1.33 
  -4 -21  -1   14.26    1.33 
  -4 -21  -1   11.07    1.40 
  -4  21  -1   13.25    1.32 
   4  21   1    9.98    1.43 
   4  21   1   13.53    1.38 
   4  21   1   15.24    1.36 
  -4  21  -1   10.77    1.42 
  -5 -21  -1   46.40    4.05 
  -5 -21  -1   48.68    3.94 
   5 -21   1   39.99    3.98 
   5 -21   1   45.55    4.01 
   5  21   1   47.94    3.99 
   5  21   1   43.04    4.06 
   5  21   1   45.59    3.96 
  -5  21  -1   45.29    4.11 
   6 -21   1    6.79    0.98 
  -6 -21  -1    8.23    0.90 
   6 -21   1    5.75    0.97 
  -6 -21  -1    8.57    1.09 
   6  21   1    8.63    0.96 
   6  21   1    7.84    0.98 
  -6  21  -1    6.59    1.12 
   6  21   1    6.64    1.05 
  -7 -21  -1   -0.90    0.68 
   7 -21   1   -1.55    0.58 
   7 -21   1   -0.09    0.59 
   7  21   1    0.25    0.60 
  -7  21  -1   -0.36    0.83 
   7  21   1   -0.35    0.58 
   7  21   1    0.53    0.71 
  -8 -21  -1    1.10    0.75 
   8 -21   1    1.96    0.67 
   8 -21   1    0.83    0.70 
   8  21   1    3.06    0.78 
  -8  21  -1    0.51    0.88 
   8  21   1    1.72    0.67 
   8  21   1    0.38    0.62 
   9 -21   1    0.14    0.66 
  -9 -21  -1    1.27    0.79 
   9 -21   1   -0.40    0.66 
   9  21   1    0.26    0.69 
   9  21   1    1.09    0.75 
  -9  21  -1    0.89    0.95 
   9  21   1   -0.71    0.64 
  10 -21   1   -0.02    0.75 
 -10 -21  -1    0.13    0.78 
 -10  21  -1    1.82    1.04 
  10  21   1    0.72    0.70 
  10  21   1   -0.41    0.65 
  11 -21   1    2.83    0.85 
 -11 -21  -1    1.37    0.90 
 -11  21  -1    3.68    1.15 
  11  21   1    3.58    0.83 
  11  21   1    2.76    0.83 
  12 -21   1    2.25    0.92 
 -12 -21  -1    1.83    0.93 
  12  21   1    2.97    0.86 
 -12  21  -1    3.05    1.10 
  12  21   1    3.78    0.83 
  13 -21   1   -0.66    0.80 
 -13 -21  -1    0.92    0.94 
  13  21   1    0.52    0.75 
 -13  21  -1    0.02    1.06 
  13  21   1   -0.36    0.80 
 -12 -22   1    3.92    1.16 
  12 -22  -1    7.22    1.18 
  12  22  -1    7.23    1.07 
 -12  22   1    5.72    1.33 
  12  22  -1    8.46    1.08 
  11 -22  -1   -1.36    0.81 
 -11 -22   1    1.89    0.90 
  11  22  -1   -0.03    0.72 
 -11  22   1    1.35    1.12 
  11  22  -1   -0.60    0.70 
  10 -22  -1   -1.40    0.71 
 -10 -22   1    1.30    0.91 
  10  22  -1   -0.91    0.66 
  10  22  -1   -0.04    0.68 
 -10  22   1   -0.59    0.98 
  -9 -22   1    0.14    0.82 
   9 -22  -1   -0.82    0.70 
   9  22  -1   -0.50    0.64 
  -9  22   1   -1.12    0.92 
   9  22  -1    0.20    0.79 
   9  22  -1   -0.34    0.68 
   8 -22  -1    3.10    0.82 
  -8 -22   1    4.19    0.95 
   8  22  -1    3.98    0.78 
   8  22  -1    4.34    0.90 
  -8  22   1    1.62    1.00 
   8  22  -1    5.49    0.81 
  -7 -22   1   -0.11    0.75 
   7 -22  -1    0.88    0.63 
   7 -22  -1    0.37    0.66 
   7  22  -1    2.23    0.65 
   7  22  -1    0.67    0.76 
   7  22  -1    0.75    0.64 
  -7  22   1    0.02    0.89 
  -6 -22   1    7.94    1.06 
   6 -22  -1    6.55    0.91 
   6 -22  -1    5.02    0.87 
   6  22  -1    7.21    0.85 
   6  22  -1    4.28    0.85 
  -6  22   1    5.14    1.05 
   6  22  -1    5.78    1.02 
   5 -22  -1   14.37    1.49 
   5 -22  -1   10.00    1.43 
  -5 -22   1   16.92    1.59 
  -5 -22   1   15.96    1.60 
  -5  22   1   11.30    1.57 
   5  22  -1   13.17    1.61 
   5  22  -1   16.83    1.54 
   5  22  -1   17.75    1.49 
  -4 -22   1    9.33    0.94 
   4 -22  -1    7.39    1.01 
  -4 -22   1    7.14    1.09 
  -4  22   1    7.31    1.16 
   4  22  -1    8.46    1.02 
  -4  22   1    8.47    0.95 
   4  22  -1    9.71    0.97 
   4  22  -1    6.84    1.16 
  -3 -22   1    1.07    0.48 
   3 -22  -1    1.58    0.57 
  -3 -22   1    1.22    0.71 
   3 -22  -1   -0.12    0.62 
  -3  22   1    0.65    0.50 
   3  22  -1    0.48    0.54 
   3  22  -1    0.87    0.81 
   3  22  -1    1.10    0.50 
  -3  22   1    0.30    0.75 
  -3  22   1    0.86    0.39 
   2 -22  -1    1.21    0.56 
  -2 -22   1    1.13    0.65 
  -2 -22   1    1.55    0.49 
   2 -22  -1    0.91    0.61 
  -2  22   1    1.24    0.50 
   2  22  -1    0.75    0.77 
  -2  22   1    2.83    0.78 
   2  22  -1    0.42    0.45 
   2  22  -1    0.75    0.53 
  -2  22   1    0.61    0.43 
   1 -22  -1   20.52    1.87 
  -1 -22   1   18.25    1.75 
   1 -22  -1   17.33    1.79 
  -1 -22   1   17.61    1.84 
  -1  22   1   18.80    1.69 
  -1  22   1   17.71    1.93 
   1  22  -1   18.24    1.77 
   1  22  -1   17.94    1.68 
  -1  22   1   18.99    1.76 
   1  22  -1   15.76    1.86 
   0 -22  -1   53.39    4.57 
   0 -22   1   56.75    4.57 
   0 -22   1   54.66    4.63 
   0 -22  -1   57.14    4.62 
   0  22  -1   50.67    4.52 
   0  22  -1   49.95    4.55 
   0  22  -1   51.40    4.68 
   0  22   1   49.84    4.67 
   0  22   1   53.93    4.53 
   0  22   1   50.62    4.56 
   1 -22   1    5.11    0.82 
  -1 -22  -1    4.47    0.69 
   1 -22   1    5.09    0.73 
  -1 -22  -1    4.80    0.82 
  -1  22  -1    5.34    0.70 
  -1  22  -1    4.72    0.64 
   1  22   1    4.67    0.65 
   1  22   1    2.07    0.89 
   1  22   1    6.00    0.74 
  -1  22  -1    3.87    0.91 
   2 -22   1    3.01    0.62 
  -2 -22  -1    2.51    0.54 
   2 -22   1    1.62    0.68 
  -2 -22  -1    2.00    0.69 
  -2  22  -1    1.50    0.45 
   2  22   1    1.16    0.57 
  -2  22  -1    2.91    0.84 
   2  22   1    2.51    0.55 
  -2  22  -1    2.27    0.55 
   2  22   1    0.88    0.77 
  -3 -22  -1   -0.32    0.46 
   3 -22   1   -0.22    0.54 
  -3 -22  -1   -0.03    0.65 
   3 -22   1   -0.07    0.58 
  -3  22  -1   -0.31    0.47 
  -3  22  -1   -0.59    0.73 
   3  22   1   -0.24    0.47 
  -3  22  -1    0.01    0.46 
   3  22   1   -0.71    0.77 
   3  22   1    0.29    0.55 
   4 -22   1    9.78    1.06 
  -4 -22  -1   11.58    1.08 
  -4 -22  -1    7.95    1.14 
   4 -22   1    4.41    1.02 
  -4  22  -1    9.15    1.21 
   4  22   1    8.64    1.03 
   4  22   1    8.05    1.20 
   4  22   1    9.31    1.01 
  -4  22  -1    9.05    0.96 
  -5 -22  -1   18.50    1.82 
   5 -22   1   16.07    1.69 
  -5 -22  -1   18.96    1.60 
   5 -22   1   11.92    1.60 
   5  22   1   16.83    1.63 
  -5  22  -1   17.15    1.60 
   5  22   1   13.66    1.71 
   5  22   1   16.18    1.67 
  -5  22  -1   16.97    1.84 
   6 -22   1   11.46    1.22 
  -6 -22  -1    9.22    1.28 
   6 -22   1   11.54    1.23 
   6  22   1   10.50    1.19 
   6  22   1   11.86    1.17 
   6  22   1    7.84    1.28 
  -6  22  -1    9.49    1.34 
   7 -22   1    1.40    0.67 
  -7 -22  -1    1.05    0.77 
   7 -22   1   -0.55    0.67 
   7  22   1   -0.94    0.59 
  -7  22  -1   -0.73    0.86 
   7  22   1    0.57    0.64 
   7  22   1   -0.06    0.74 
  -8 -22  -1    0.10    0.81 
   8 -22   1    0.40    0.67 
   8 -22   1    0.28    0.69 
   8  22   1    1.20    0.67 
   8  22   1    0.63    0.74 
   8  22   1    0.72    0.67 
  -8  22  -1    2.01    0.94 
   9 -22   1    4.00    1.05 
   9 -22   1    2.21    0.85 
  -9 -22  -1    2.56    0.94 
   9  22   1    2.61    0.76 
  -9  22  -1    3.46    1.06 
   9  22   1    4.63    0.82 
  10 -22   1   11.32    1.35 
 -10 -22  -1    8.97    1.40 
  10  22   1   11.90    1.31 
  10  22   1   12.62    1.32 
 -10  22  -1    9.59    1.53 
  11 -22   1   -0.22    0.79 
 -11 -22  -1    0.53    0.88 
  11  22   1    0.27    0.76 
  11  22   1    1.32    0.78 
 -11  22  -1    1.15    1.12 
 -12 -22  -1   -0.36    0.90 
  12 -22   1   -1.01    0.77 
 -12  22  -1   -0.71    1.03 
  12  22   1   -0.24    0.75 
  12  22   1    0.05    0.77 
 -12 -23   1   -1.41    0.98 
  12 -23  -1    0.34    0.86 
  12  23  -1   -0.97    0.76 
 -12  23   1    0.87    1.12 
  12  23  -1    0.98    0.84 
  11 -23  -1    2.00    0.91 
 -11 -23   1    2.66    1.00 
 -11  23   1    0.34    1.18 
  11  23  -1    2.09    0.82 
  11  23  -1    3.63    0.91 
 -10 -23   1    1.69    0.93 
  10 -23  -1    2.00    0.88 
  10  23  -1    2.25    0.83 
  10  23  -1    2.93    0.83 
 -10  23   1    2.02    1.15 
  -9 -23   1    0.03    0.86 
   9 -23  -1   -1.36    0.69 
   9  23  -1    0.23    0.65 
   9  23  -1    1.74    0.89 
   9  23  -1   -0.19    0.67 
  -9  23   1   -0.23    0.99 
   8 -23  -1    2.02    0.79 
  -8 -23   1    2.15    0.90 
   8  23  -1    1.44    0.67 
   8  23  -1    0.87    0.73 
  -8  23   1    2.00    1.01 
   8  23  -1    1.45    0.83 
   7 -23  -1    0.22    0.63 
  -7 -23   1   -0.18    0.79 
   7 -23  -1   -1.07    0.67 
   7  23  -1   -1.12    0.61 
   7  23  -1   -0.22    0.62 
   7  23  -1   -0.29    0.77 
  -7  23   1   -0.10    0.95 
   6 -23  -1    5.09    0.88 
   6 -23  -1    7.53    0.95 
  -6 -23   1    5.89    1.03 
   6  23  -1    6.01    0.91 
  -6  23   1    4.43    1.07 
   6  23  -1    7.18    0.88 
   6  23  -1    5.09    1.06 
  -5 -23   1   13.12    1.45 
   5 -23  -1   14.38    1.39 
   5  23  -1   10.26    1.47 
  -5  23   1   10.88    1.49 
   5  23  -1   11.41    1.33 
   5  23  -1   12.91    1.29 
  -4 -23   1    3.57    0.79 
   4 -23  -1    1.52    0.67 
  -4 -23   1    2.31    0.55 
   4 -23  -1    2.09    0.66 
  -4  23   1    1.27    0.85 
   4  23  -1    0.28    0.86 
   4  23  -1    3.27    0.60 
  -4  23   1    3.20    0.58 
   4  23  -1    3.13    0.68 
   3 -23  -1    6.36    0.96 
   3 -23  -1    5.95    0.91 
  -3 -23   1    6.11    0.85 
  -3 -23   1    5.47    1.01 
  -3  23   1    8.17    0.88 
   3  23  -1    8.36    0.94 
   3  23  -1    8.46    0.88 
  -3  23   1    4.42    1.05 
   3  23  -1    5.86    1.11 
  -3  23   1    9.21    0.82 
   2 -23  -1    1.29    0.57 
  -2 -23   1    1.24    0.49 
   2 -23  -1    0.12    0.60 
  -2 -23   1    1.14    0.69 
   2  23  -1    1.01    0.56 
  -2  23   1    0.38    0.76 
   2  23  -1    1.50    0.51 
   2  23  -1    0.09    0.78 
  -2  23   1    1.18    0.53 
  -2  23   1    0.46    0.42 
   1 -23  -1    0.72    0.64 
  -1 -23   1    0.65    0.50 
   1 -23  -1    0.29    0.53 
  -1 -23   1   -0.45    0.64 
  -1  23   1    0.67    0.44 
  -1  23   1    0.58    0.52 
   1  23  -1    0.23    0.51 
   1  23  -1    0.84    0.46 
  -1  23   1   -0.39    0.76 
   1  23  -1    0.62    0.81 
   0 -23   1    6.56    0.84 
   0 -23  -1    6.32    0.84 
   0 -23   1    7.25    0.96 
   0 -23  -1    7.38    0.96 
   0  23   1    4.11    1.02 
   0  23  -1    5.18    1.04 
   0  23  -1    6.88    0.77 
   0  23   1    7.16    0.84 
   0  23  -1    6.15    0.82 
   0  23   1    6.23    0.77 
  -1 -23  -1    0.57    0.51 
   1 -23   1    0.78    0.51 
   1 -23   1    0.08    0.66 
  -1 -23  -1    0.25    0.63 
   1  23   1   -0.54    0.77 
  -1  23  -1    0.83    0.42 
  -1  23  -1    0.88    0.48 
  -1  23  -1   -0.26    0.74 
   1  23   1    0.47    0.46 
   1  23   1    0.67    0.52 
   2 -23   1    4.51    0.80 
  -2 -23  -1    5.78    0.82 
   2 -23   1    3.90    0.71 
  -2 -23  -1    3.07    0.64 
   2  23   1    3.89    0.70 
   2  23   1    4.43    0.65 
  -2  23  -1    4.17    0.90 
  -2  23  -1    3.27    0.56 
  -2  23  -1    2.63    0.62 
   2  23   1    5.51    0.94 
  -3 -23  -1   14.91    1.48 
  -3 -23  -1   14.92    1.63 
   3 -23   1   15.57    1.57 
   3 -23   1   12.49    1.50 
   3  23   1   12.70    1.60 
   3  23   1   15.41    1.49 
  -3  23  -1   15.15    1.61 
  -3  23  -1   13.90    1.45 
   3  23   1   13.97    1.50 
   4 -23   1    2.89    0.82 
  -4 -23  -1    4.03    0.89 
  -4 -23  -1    6.20    0.75 
   4 -23   1    7.00    0.85 
  -4  23  -1    4.38    0.71 
  -4  23  -1    6.18    1.00 
   4  23   1    4.78    0.74 
   4  23   1    4.21    0.81 
   4  23   1    6.59    1.04 
  -5 -23  -1   12.13    1.35 
  -5 -23  -1   12.07    1.22 
   5 -23   1   10.44    1.22 
   5  23   1    8.26    1.32 
  -5  23  -1   10.77    1.13 
  -5  23  -1    8.84    1.34 
   5  23   1    9.70    1.18 
   5  23   1   11.53    1.18 
   6 -23   1    1.65    0.70 
  -6 -23  -1    1.93    0.81 
   6 -23   1    2.05    0.69 
   6  23   1    1.06    0.61 
   6  23   1    1.88    0.66 
  -6  23  -1    1.87    0.90 
   6  23   1    0.11    0.79 
   7 -23   1    0.08    0.69 
   7 -23   1    1.51    0.69 
  -7 -23  -1   -0.57    0.76 
   7  23   1    0.54    0.65 
   7  23   1    0.73    0.78 
  -7  23  -1    1.80    0.93 
   7  23   1    0.65    0.64 
  -8 -23  -1    2.70    0.92 
   8 -23   1    2.95    0.79 
   8 -23   1    3.63    0.83 
   8  23   1    3.32    0.79 
   8  23   1    3.05    0.78 
   8  23   1    3.42    0.87 
  -8  23  -1    3.39    1.05 
  -9 -23  -1    2.29    0.91 
   9 -23   1    1.96    0.84 
   9  23   1    2.35    0.74 
  -9  23  -1    3.73    1.10 
   9  23   1    1.44    0.79 
 -10 -23  -1    0.65    0.92 
  10 -23   1   -0.13    0.76 
  10  23   1    1.73    0.79 
 -10  23  -1   -0.65    1.07 
  10  23   1    0.70    0.74 
 -11 -23  -1    3.48    1.01 
  11 -23   1    4.47    1.01 
  11  23   1    3.14    0.89 
 -11  23  -1    3.69    1.27 
  11  23   1    3.60    0.89 
  12 -23   1    4.67    1.05 
 -12 -23  -1    3.65    1.15 
 -12  23  -1    3.63    1.26 
  12  23   1    5.92    1.05 
  12  23   1    5.97    1.02 
 -11 -24   1   -0.48    0.94 
  11 -24  -1    0.24    0.87 
 -11  24   1   -0.55    1.20 
  11  24  -1    0.27    0.75 
  11  24  -1   -0.79    0.81 
  10 -24  -1    1.22    0.81 
 -10 -24   1    0.28    0.93 
 -10  24   1    2.61    1.19 
  10  24  -1   -0.27    0.75 
  10  24  -1   -0.64    0.72 
  -9 -24   1   -0.20    0.95 
   9 -24  -1    0.66    0.81 
   9  24  -1    2.42    0.77 
  -9  24   1    2.49    1.10 
   9  24  -1    1.85    0.92 
   9  24  -1    1.29    0.72 
  -8 -24   1   -2.01    0.80 
   8 -24  -1   -0.20    0.72 
  -8  24   1   -0.84    1.00 
   8  24  -1    0.75    0.66 
   8  24  -1    0.80    0.83 
   8  24  -1   -0.14    0.71 
  -7 -24   1    2.26    0.95 
   7 -24  -1    3.36    0.78 
  -7  24   1    1.34    1.02 
   7  24  -1    1.62    0.68 
   7  24  -1    1.00    0.89 
   7  24  -1    3.10    0.75 
   6 -24  -1   -0.22    0.69 
  -6 -24   1   -1.91    0.75 
   6 -24  -1    0.73    0.66 
  -6  24   1    0.40    0.88 
   6  24  -1   -0.13    0.63 
   6  24  -1   -0.69    0.85 
   6  24  -1   -0.66    0.57 
   5 -24  -1    1.33    0.71 
  -5 -24   1    3.64    0.87 
   5 -24  -1    4.41    0.79 
   5  24  -1    1.23    0.94 
   5  24  -1    4.96    0.80 
  -5  24   1    2.68    0.97 
   5  24  -1    4.35    0.71 
  -5  24   1    3.87    0.66 
   4 -24  -1    3.56    0.79 
  -4 -24   1    3.82    0.87 
  -4 -24   1    3.68    0.64 
   4 -24  -1    4.30    0.76 
   4  24  -1    3.49    0.75 
   4  24  -1    3.26    0.95 
   4  24  -1    4.53    0.69 
  -4  24   1    4.02    0.67 
  -4  24   1    3.10    0.96 
   3 -24  -1   -0.30    0.58 
  -3 -24   1   -0.24    0.49 
  -3 -24   1   -0.42    0.67 
   3 -24  -1   -1.22    0.62 
  -3  24   1    0.51    0.52 
   3  24  -1   -0.19    0.56 
   3  24  -1    0.45    0.53 
   3  24  -1   -0.53    0.79 
  -3  24   1    0.92    0.83 
   2 -24  -1    6.68    0.90 
  -2 -24   1    5.59    0.76 
   2 -24  -1    6.60    0.82 
  -2 -24   1    6.25    0.91 
  -2  24   1    5.04    0.98 
   2  24  -1    6.00    1.03 
  -2  24   1    4.82    0.68 
  -2  24   1    4.21    0.74 
   2  24  -1    4.84    0.73 
   2  24  -1    3.34    0.75 
  -1 -24   1   -0.01    0.49 
   1 -24  -1   -0.06    0.61 
  -1 -24   1    0.89    0.69 
   1 -24  -1   -0.13    0.54 
   1  24  -1    0.56    0.55 
  -1  24   1    0.66    0.45 
   1  24  -1    0.49    0.46 
  -1  24   1    0.61    0.80 
  -1  24   1   -0.32    0.48 
   1  24  -1    0.61    0.82 
   0 -24  -1    0.18    0.52 
   0 -24   1    0.61    0.53 
   0 -24  -1    1.52    0.71 
   0 -24   1    0.13    0.65 
   0  24   1   -0.62    0.52 
   0  24  -1    1.10    0.81 
   0  24  -1    0.15    0.43 
   0  24  -1    0.49    0.52 
   0  24   1    0.88    0.82 
   0  24   1   -0.15    0.45 
   1 -24   1    3.01    0.76 
  -1 -24  -1    2.94    0.76 
  -1 -24  -1    3.38    0.63 
   1 -24   1    3.27    0.64 
  -1  24  -1    2.50    0.58 
   1  24   1    2.21    0.64 
   1  24   1    1.80    0.86 
  -1  24  -1    2.87    0.53 
   1  24   1    2.81    0.58 
  -1  24  -1    3.32    0.89 
  -2 -24  -1    6.56    0.92 
   2 -24   1    5.32    0.90 
   2 -24   1    6.32    0.83 
  -2 -24  -1    5.74    0.78 
   2  24   1    5.37    0.82 
  -2  24  -1    5.10    0.76 
   2  24   1    5.15    0.76 
  -2  24  -1    5.63    1.05 
   2  24   1    5.42    1.04 
  -3 -24  -1    2.03    0.57 
  -3 -24  -1    3.30    0.80 
   3 -24   1    3.29    0.69 
   3 -24   1    1.19    0.73 
  -3  24  -1    1.37    0.84 
   3  24   1    3.02    0.68 
   3  24   1    1.91    0.57 
  -3  24  -1    2.30    0.58 
   3  24   1    1.65    0.88 
   4 -24   1    7.72    0.95 
  -4 -24  -1    7.90    1.09 
  -4 -24  -1    8.43    0.88 
   4 -24   1    3.87    0.94 
  -4  24  -1    6.80    0.85 
   4  24   1    6.71    0.89 
   4  24   1    5.23    1.11 
  -4  24  -1    6.21    1.10 
   4  24   1    8.89    0.99 
   5 -24   1    0.06    0.70 
  -5 -24  -1    4.85    0.91 
   5 -24   1    4.46    0.77 
   5  24   1    3.44    0.75 
   5  24   1    3.34    0.69 
  -5  24  -1    3.21    0.61 
   5  24   1    1.84    0.91 
  -5  24  -1    4.26    0.98 
   6 -24   1   -0.99    0.65 
  -6 -24  -1    1.23    0.84 
   6 -24   1    0.19    0.68 
  -6  24  -1   -0.46    0.51 
   6  24   1   -0.91    0.80 
   6  24   1    0.24    0.62 
   6  24   1   -0.35    0.63 
  -6  24  -1    1.33    0.92 
  -7 -24  -1    0.01    0.82 
   7 -24   1   -0.63    0.67 
   7 -24   1    0.32    0.70 
   7  24   1    0.02    0.66 
   7  24   1    0.42    0.83 
  -7  24  -1    1.12    0.95 
   7  24   1   -0.27    0.61 
  -8 -24  -1    3.56    1.03 
   8 -24   1    4.99    0.96 
   8  24   1    3.77    0.97 
   8  24   1    4.94    0.86 
   8  24   1    3.48    0.86 
  -8  24  -1    4.77    1.13 
   9 -24   1    2.23    0.82 
  -9 -24  -1    0.64    0.93 
  -9  24  -1    1.97    1.06 
   9  24   1    2.26    0.82 
   9  24   1    2.22    0.75 
 -10 -24  -1    0.78    0.93 
  10 -24   1   -1.13    0.76 
 -10  24  -1    0.79    1.14 
  10  24   1   -1.17    0.69 
  10  24   1    0.99    0.78 
  11 -24   1    3.02    0.99 
 -11 -24  -1    2.07    1.04 
  11  24   1    2.98    0.94 
 -11  24  -1    2.31    1.28 
  11  24   1    4.79    0.92 
 -10 -25   1    1.13    1.01 
  10 -25  -1    0.64    0.82 
  10  25  -1    0.34    0.78 
  10  25  -1    0.67    0.75 
 -10  25   1    0.79    1.22 
  -9 -25   1    0.80    0.95 
   9 -25  -1    1.38    0.85 
   9  25  -1    1.43    0.76 
  -9  25   1    3.54    1.17 
   9  25  -1    1.37    0.80 
  -8 -25   1    2.47    1.00 
   8 -25  -1    3.47    0.87 
  -8  25   1    3.62    1.14 
   8  25  -1    1.84    0.95 
   8  25  -1    3.69    0.78 
   8  25  -1    2.69    0.84 
   7 -25  -1    0.12    0.71 
  -7 -25   1    1.54    0.89 
   7  25  -1    1.54    0.65 
  -7  25   1    1.47    1.07 
   7  25  -1    0.28    0.89 
   7  25  -1    1.09    0.72 
  -6 -25   1    0.31    0.83 
   6 -25  -1   -0.17    0.72 
   6 -25  -1    1.38    0.74 
  -6  25   1    2.39    0.58 
  -6  25   1    2.73    1.00 
   6  25  -1    1.94    0.65 
   6  25  -1    0.29    0.92 
   6  25  -1    0.17    0.73 
  -5 -25   1   -0.33    0.76 
   5 -25  -1    0.00    0.62 
   5 -25  -1   -0.73    0.65 
  -5  25   1    0.61    0.53 
   5  25  -1   -0.36    0.87 
  -5  25   1   -0.13    0.88 
   5  25  -1    0.05    0.56 
   5  25  -1    0.83    0.66 
  -4 -25   1   -0.56    0.71 
   4 -25  -1   -0.84    0.64 
   4 -25  -1    0.44    0.64 
  -4  25   1   -0.04    0.84 
   4  25  -1    0.90    0.53 
  -4  25   1    0.23    0.51 
   4  25  -1    0.39    0.65 
   4  25  -1    0.57    0.89 
   3 -25  -1    1.73    0.63 
  -3 -25   1    1.07    0.53 
   3 -25  -1   -0.05    0.67 
  -3 -25   1    1.10    0.73 
   3  25  -1    1.47    0.54 
  -3  25   1    1.14    0.56 
  -3  25   1   -0.16    0.88 
   3  25  -1    0.27    0.61 
   3  25  -1    0.63    0.90 
  -2 -25   1    0.72    0.51 
   2 -25  -1   -0.17    0.58 
  -2 -25   1   -0.79    0.69 
   2 -25  -1   -0.24    0.67 
  -2  25   1   -1.09    0.77 
   2  25  -1   -0.93    0.55 
   2  25  -1    0.73    0.49 
   2  25  -1    0.04    0.85 
  -2  25   1    0.38    0.49 
   1 -25  -1    3.28    0.73 
  -1 -25   1    4.54    0.72 
   1 -25  -1    4.12    0.84 
  -1 -25   1    4.68    0.86 
  -1  25   1    4.31    0.96 
   1  25  -1    4.66    1.02 
   1  25  -1    5.45    0.73 
  -1  25   1    4.38    0.64 
   1  25  -1    3.47    0.65 
  -1  25   1    4.38    0.70 
   0 -25  -1    4.36    0.73 
   0 -25   1    4.00    0.72 
   0 -25   1    3.35    0.82 
   0 -25  -1    5.60    0.88 
   0  25   1    3.89    0.72 
   0  25   1    3.28    0.97 
   0  25  -1    5.01    0.65 
   0  25  -1    4.60    0.73 
   0  25   1    4.57    0.65 
   0  25  -1    3.69    0.97 
   1 -25   1    0.52    0.66 
  -1 -25  -1    0.31    0.67 
   1 -25   1    0.35    0.57 
  -1 -25  -1    0.50    0.54 
  -1  25  -1   -0.03    0.84 
   1  25   1    0.81    0.86 
   1  25   1   -0.14    0.47 
   1  25   1    0.10    0.53 
  -1  25  -1    0.94    0.53 
  -1  25  -1   -0.24    0.44 
   2 -25   1   -1.20    0.67 
  -2 -25  -1    0.16    0.69 
   2 -25   1   -0.58    0.55 
  -2 -25  -1   -0.38    0.52 
   2  25   1    0.03    0.83 
   2  25   1    0.41    0.49 
  -2  25  -1    0.26    0.50 
   2  25   1    0.78    0.57 
  -2  25  -1    2.28    0.86 
  -3 -25  -1   12.14    1.38 
  -3 -25  -1   13.02    1.30 
   3 -25   1   11.82    1.35 
   3 -25   1   11.37    1.29 
  -3  25  -1   12.81    1.29 
  -3  25  -1   10.40    1.44 
   3  25   1    9.14    1.45 
   3  25   1   12.28    1.30 
   3  25   1   11.73    1.24 
   4 -25   1    3.52    0.92 
  -4 -25  -1    6.80    1.02 
   4 -25   1    5.67    0.88 
  -4 -25  -1    6.34    0.81 
  -4  25  -1    6.55    0.80 
  -4  25  -1    5.72    1.08 
   4  25   1    4.50    0.86 
   4  25   1    6.93    0.84 
   4  25   1    4.41    1.09 
   5 -25   1   -1.33    0.66 
  -5 -25  -1    1.30    0.79 
   5 -25   1    1.23    0.64 
  -5  25  -1    1.00    0.95 
  -5  25  -1    0.75    0.52 
   5  25   1    0.21    0.63 
   5  25   1    0.71    0.58 
   5  25   1   -0.57    0.81 
   6 -25   1    2.32    0.76 
   6 -25   1   -0.51    0.73 
  -6 -25  -1    2.65    0.91 
  -6  25  -1    3.30    1.00 
   6  25   1    1.75    0.70 
  -6  25  -1    2.60    0.60 
   6  25   1    1.97    0.92 
   6  25   1    3.10    0.79 
  -7 -25  -1    1.24    0.92 
   7 -25   1    0.96    0.78 
   7 -25   1    0.10    0.72 
  -7  25  -1    1.63    0.58 
  -7  25  -1   -0.18    0.97 
   7  25   1    1.62    0.66 
   7  25   1   -0.31    0.84 
   7  25   1    0.93    0.72 
  -8 -25  -1   -0.65    0.85 
   8 -25   1   -1.43    0.69 
   8  25   1   -0.20    0.65 
   8  25   1    0.19    0.73 
  -8  25  -1    0.31    1.02 
   8  25   1    0.60    0.85 
   9 -25   1    1.85    0.84 
  -9 -25  -1   -0.41    0.90 
   9  25   1    1.96    0.74 
  -9  25  -1    0.96    1.09 
   9  25   1    0.36    0.80 
 -10 -25  -1   -0.24    0.94 
  10 -25   1   -0.52    0.78 
  10  25   1    1.21    0.82 
  10  25   1    0.39    0.74 
 -10  25  -1   -0.60    1.15 
 -10 -26   1    1.30    1.08 
  10 -26  -1    1.55    0.95 
 -10  26   1    0.55    1.26 
  10  26  -1    0.76    0.84 
  10  26  -1    0.93    0.76 
  -9 -26   1    3.05    1.05 
   9 -26  -1    1.63    0.86 
   9  26  -1    2.64    0.89 
   9  26  -1    2.33    0.80 
  -9  26   1    2.77    1.17 
   8 -26  -1    0.30    0.76 
  -8 -26   1   -0.78    0.89 
   8  26  -1    0.46    0.81 
  -8  26   1   -0.19    1.05 
   8  26  -1   -0.10    0.72 
   8  26  -1   -0.64    0.88 
   7 -26  -1    0.96    0.79 
  -7 -26   1    2.18    0.91 
  -7  26   1   -0.35    0.56 
  -7  26   1    0.62    1.07 
   7  26  -1   -0.04    0.91 
   7  26  -1    0.26    0.73 
   7  26  -1   -0.01    0.63 
   6 -26  -1    0.88    0.71 
  -6 -26   1    1.39    0.86 
  -6  26   1    2.90    1.08 
   6  26  -1    1.14    0.72 
   6  26  -1    2.26    0.68 
   6  26  -1    1.50    0.98 
  -6  26   1    0.58    0.61 
   5 -26  -1   -0.20    0.68 
  -5 -26   1    0.28    0.82 
   5 -26  -1    0.68    0.66 
   5  26  -1    0.66    0.58 
  -5  26   1   -0.19    0.91 
  -5  26   1    0.44    0.53 
   5  26  -1   -0.52    0.85 
   5  26  -1   -0.59    0.67 
  -4 -26   1    4.88    0.95 
   4 -26  -1    4.05    0.89 
   4 -26  -1    4.49    0.86 
  -4  26   1    5.72    0.77 
   4  26  -1    5.30    0.80 
   4  26  -1    4.91    1.09 
  -4  26   1    4.06    1.07 
   4  26  -1    5.63    0.88 
  -3 -26   1    0.81    0.71 
   3 -26  -1    0.18    0.67 
   3 -26  -1    0.62    0.64 
  -3 -26   1   -0.18    0.54 
   3  26  -1    0.10    0.60 
   3  26  -1   -0.95    0.89 
  -3  26   1   -0.01    0.85 
  -3  26   1    0.51    0.53 
   3  26  -1    0.29    0.55 
  -2 -26   1    4.53    0.70 
   2 -26  -1    4.37    0.77 
  -2 -26   1    3.79    0.85 
   2 -26  -1    3.65    0.84 
   2  26  -1    3.67    0.66 
   2  26  -1    3.53    1.00 
  -2  26   1    4.16    0.70 
   2  26  -1    3.06    0.73 
  -2  26   1    2.88    1.01 
   1 -26  -1    4.27    0.85 
  -1 -26   1    4.69    0.87 
  -1 -26   1    4.97    0.72 
   1 -26  -1    3.06    0.71 
   1  26  -1    2.13    0.69 
   1  26  -1    3.45    0.64 
  -1  26   1    3.25    0.60 
  -1  26   1    4.68    0.71 
   1  26  -1    4.50    1.00 
  -1  26   1    3.50    1.00 
   0 -26   1    2.97    0.66 
   0 -26   1    2.48    0.77 
   0 -26  -1    2.38    0.65 
   0 -26  -1    3.28    0.79 
   0  26  -1    2.10    0.55 
   0  26  -1    3.09    0.65 
   0  26  -1    2.40    0.92 
   0  26   1    3.37    0.58 
   0  26   1    3.04    0.93 
   0  26   1    2.07    0.63 
  -1 -26  -1    2.09    0.63 
   1 -26   1    1.61    0.66 
  -1 -26  -1    2.06    0.78 
   1 -26   1    2.50    0.79 
  -1  26  -1    3.61    0.99 
   1  26   1    2.63    0.94 
  -1  26  -1    3.08    0.64 
   1  26   1    3.38    0.65 
   1  26   1    2.17    0.57 
   2 -26   1    1.62    0.80 
  -2 -26  -1    3.19    0.63 
  -2 -26  -1    2.67    0.81 
   2 -26   1    2.46    0.67 
  -2  26  -1    2.45    0.61 
  -2  26  -1    2.13    0.96 
   2  26   1    2.42    0.59 
   2  26   1    4.01    0.70 
   2  26   1    1.93    0.89 
  -3 -26  -1    3.53    0.68 
   3 -26   1    3.99    0.73 
   3 -26   1    2.07    0.80 
  -3 -26  -1    5.22    0.87 
   3  26   1    2.03    0.98 
  -3  26  -1    3.42    0.66 
  -3  26  -1    3.84    0.99 
   3  26   1    3.38    0.74 
   3  26   1    3.72    0.68 
   4 -26   1    1.50    0.66 
  -4 -26  -1    2.71    0.82 
   4 -26   1    1.03    0.75 
   4  26   1    0.86    0.91 
   4  26   1    2.11    0.70 
   4  26   1    1.47    0.63 
  -4  26  -1    2.28    0.59 
  -4  26  -1    1.95    0.91 
   5 -26   1    0.71    0.65 
  -5 -26  -1    1.54    0.84 
   5 -26   1   -1.22    0.70 
   5  26   1    0.03    0.90 
  -5  26  -1    0.49    0.92 
   5  26   1    0.63    0.71 
   5  26   1    0.75    0.63 
  -5  26  -1    1.46    0.56 
  -6 -26  -1    6.38    1.16 
   6 -26   1    8.93    1.08 
  -6  26  -1    7.70    0.92 
  -6  26  -1    5.18    1.28 
   6  26   1    7.88    1.02 
   6  26   1    9.22    1.09 
   6  26   1    5.41    1.19 
   7 -26   1    0.95    0.75 
  -7 -26  -1    0.62    0.87 
   7  26   1    0.72    0.78 
  -7  26  -1   -0.44    1.07 
   7  26   1   -1.20    0.84 
  -7  26  -1    0.61    0.65 
   7  26   1    0.13    0.69 
   8 -26   1   -0.06    0.75 
  -8 -26  -1    0.85    0.93 
   8  26   1   -0.29    0.76 
   8  26   1    0.65    0.73 
   8  26   1    0.08    1.08 
  -8  26  -1    0.13    1.05 
   9 -26   1   -0.61    0.81 
  -9 -26  -1    0.97    0.97 
  -9  26  -1   -0.38    1.06 
   9  26   1    0.40    0.78 
   9  26   1    1.13    0.85 
 -10 -26  -1    5.65    1.23 
  10 -26   1    4.24    1.08 
  10  26   1    6.08    0.99 
 -10  26  -1    4.43    1.37 
  10  26   1    4.68    1.06 
   9 -27  -1    0.47    0.90 
  -9 -27   1   -0.32    0.99 
  -9  27   1    0.00    1.16 
   9  27  -1    0.11    0.82 
   9  27  -1    0.35    0.72 
  -8 -27   1    0.26    0.93 
   8 -27  -1   -1.54    0.79 
   8  27  -1   -0.53    0.67 
   8  27  -1   -2.11    0.90 
   8  27  -1   -0.12    0.79 
  -8  27   1    0.42    1.10 
  -7 -27   1    0.87    0.91 
   7 -27  -1   -1.59    0.73 
  -7  27   1   -1.20    0.56 
  -7  27   1    0.95    1.07
[truncated: 6,110,022 more chars]
